# Supplementary material for: National, regional, and worldwide estimates of low birthweight in 2015, with trends from 2000: a systematic analysis
Source: PubMed Central journal article supplement (PMC6560046; doi:10.1016/s2214-109x(18)30565-5), 2019-05-15
Supplement: mmc1.pdf [file mmc1.pdf]

# THE LANCET

## Global Health

### Supplementary appendix

This appendix formed part of the original submission and has been peer reviewed.  
We post it as supplied by the authors.

Supplement to: Blencowe H, Krusevec J, de Onis M, et al. National, regional, and worldwide estimates of low birthweight in 2015, with trends from 2000: a systematic analysis. *Lancet Glob Health* 2019; published online May 15. [http://dx.doi.org/10.1016/S2214-109X\(18\)30565-5](http://dx.doi.org/10.1016/S2214-109X(18)30565-5).

# National, regional, and worldwide estimates of low birthweight in 2015, with trends from 2000: a systematic analysis

## Authors

Hannah Blencowe, Julia Krasevec, Mercedes de Onis, Robert E. Black, Xiaoyi An, Gretchen A. Stevens, Elaine Borghi, Chika Hayashi, Diana Estevez, Luca Cegolon, Suhail Shiekh, Victoria Ponce Hardy, Joy E Lawn\*, Simon Cousens\*

\*joint senior authors

## Contents

|                                                                                                                                                      |    |
|------------------------------------------------------------------------------------------------------------------------------------------------------|----|
| 1. Guidelines for Accurate and Transparent Health Estimates Reporting .....                                                                          | 3  |
| Table 1.1: GATHER Checklist of information that should be included in reports of global health estimates.....                                        | 3  |
| 2. Definitions and country groupings.....                                                                                                            | 5  |
| Table 2.1: Countries by United Nations sub-regions .....                                                                                             | 5  |
| Source: United Nations .....                                                                                                                         | 5  |
| Table 2.2: Aggregated UN sub-region groupings used in reporting these estimates.....                                                                 | 6  |
| 3. Data – inclusion criteria and adjustments .....                                                                                                   | 7  |
| Inclusion criteria.....                                                                                                                              | 7  |
| Exclusion criteria .....                                                                                                                             | 7  |
| Survey low birthweight estimate adjustments .....                                                                                                    | 7  |
| 4. Data - final inputs.....                                                                                                                          | 8  |
| Table 4.1: Nationally-representative survey data meeting inclusion criteria (N=229).....                                                             | 8  |
| Table 4.2: Administrative data meeting inclusion criteria (N=1218) .....                                                                             | 13 |
| Figure 4.1: Summary of regional low birthweight rate data inputs meeting inclusion criteria....                                                      | 45 |
| Table 4.3: Summary of datapoints included by World Bank income region: .....                                                                         | 46 |
| Quality categorisation of administrative data .....                                                                                                  | 47 |
| Table 4.3: Summary of previously used and proposed quality criteria for the assessment of National Routine Data in global estimation exercises ..... | 47 |
| Table 4.4: Countries with higher quality national routine data (N=57).....                                                                           | 49 |
| Table 4.5: Summary of input data by data type .....                                                                                                  | 49 |
| 5. Predictor variables .....                                                                                                                         | 50 |
| Identification of predictor variables for model input .....                                                                                          | 50 |
| Table 5.1: Source of potential predictor variables tested in models.....                                                                             | 50 |
| 6. Model selection and estimation .....                                                                                                              | 51 |
| Table 6.1: Summary of model fitting process .....                                                                                                    | 51 |
| Final model equation .....                                                                                                                           | 52 |

|                                                                                                                           |    |
|---------------------------------------------------------------------------------------------------------------------------|----|
| Figure 6.1: Diagnostic plots for the low birthweight prediction regression model.....                                     | 52 |
| Table 6.2: Model coefficients.....                                                                                        | 54 |
| Calculation of low birthweight numbers .....                                                                              | 55 |
| Uncertainty estimation .....                                                                                              | 55 |
| Annual Average Rate of Reduction (AARR).....                                                                              | 55 |
| 7. Results.....                                                                                                           | 56 |
| Table 7.1: Estimated low birthweight rate by country for 2000 and 2015 for 148 countries with data .....                  | 56 |
| Table 7.2: Estimated low birthweight number and rate globally and by region for low birthweight regions (2000-2015) ..... | 60 |
| Figure 7.3: Graphs by country of data inputs and low birthweight rate estimates with associated uncertainty.....          | 64 |

# 1. Guidelines for Accurate and Transparent Health Estimates Reporting

Table 1.1: GATHER Checklist of information that should be included in reports of global health estimates.

| Item #                                                                                                | Checklist item                                                                                                                                                                                                                                                                                                                                                                            | Place Reported                           |
|-------------------------------------------------------------------------------------------------------|-------------------------------------------------------------------------------------------------------------------------------------------------------------------------------------------------------------------------------------------------------------------------------------------------------------------------------------------------------------------------------------------|------------------------------------------|
| <b>Objectives and funding</b>                                                                         |                                                                                                                                                                                                                                                                                                                                                                                           |                                          |
| 1                                                                                                     | Define the indicator(s), populations (including age, sex, and geographic entities), and time period(s) for which estimates were made.                                                                                                                                                                                                                                                     | Paper page 3<br>Web appendix page 55     |
| 2                                                                                                     | List the funding sources for the work.                                                                                                                                                                                                                                                                                                                                                    | Paper pages 2, 10                        |
| <b>Data Inputs</b>                                                                                    |                                                                                                                                                                                                                                                                                                                                                                                           |                                          |
| <i>For all data inputs from multiple sources that are synthesized as part of the study:</i>           |                                                                                                                                                                                                                                                                                                                                                                                           |                                          |
| 3                                                                                                     | Describe how the data were identified and how the data were accessed.                                                                                                                                                                                                                                                                                                                     | Paper pages 4-5                          |
| 4                                                                                                     | Specify the inclusion and exclusion criteria. Identify all ad-hoc exclusions.                                                                                                                                                                                                                                                                                                             | Paper pages 4-10<br>Web appendix pages 7 |
| 5                                                                                                     | Provide information on all included data sources and their main characteristics. For each data source used, report reference information or contact name/institution, population represented, data collection method, year(s) of data collection, sex and age range, diagnostic criteria or measurement method, and sample size, as relevant.                                             | Web appendix pages 8-50                  |
| 6                                                                                                     | Identify and describe any categories of input data that have potentially important biases (e.g., based on characteristics listed in item 5).                                                                                                                                                                                                                                              | Table 1                                  |
| <i>For data inputs that contribute to the analysis but were not synthesized as part of the study:</i> |                                                                                                                                                                                                                                                                                                                                                                                           |                                          |
| 7                                                                                                     | Describe and give sources for any other data inputs.                                                                                                                                                                                                                                                                                                                                      | Web appendix page 50                     |
| <i>For all data inputs:</i>                                                                           |                                                                                                                                                                                                                                                                                                                                                                                           |                                          |
| 8                                                                                                     | Provide all data inputs in a file format from which data can be efficiently extracted (e.g., a spreadsheet rather than a PDF), including all relevant meta-data listed in item 5. For any data inputs that cannot be shared because of ethical or legal reasons, such as third-party ownership, provide a contact name or the name of the institution that retains the right to the data. | Available on LSHTM data compass          |
| <b>Data analysis</b>                                                                                  |                                                                                                                                                                                                                                                                                                                                                                                           |                                          |
| 9                                                                                                     | Provide a conceptual overview of the data analysis method. A diagram may be helpful.                                                                                                                                                                                                                                                                                                      | Papers page 3                            |
| 10                                                                                                    | Provide a detailed description of all steps of the analysis, including mathematical formulae. This description should cover, as relevant, data cleaning, data pre-processing, data adjustments and weighting of data sources, and mathematical or statistical model(s).                                                                                                                   | Paper pages 4-10                         |
| 11                                                                                                    | Describe how candidate models were evaluated and how the final model(s) were selected.                                                                                                                                                                                                                                                                                                    | Web appendix page 51-55                  |
| 12                                                                                                    | Provide the results of an evaluation of model performance, if done, as well as the results of any relevant sensitivity analysis.                                                                                                                                                                                                                                                          | Paper pages 8-9                          |
| 13                                                                                                    | Describe methods for calculating uncertainty of the estimates. State which sources of uncertainty were, and were not, accounted for in the uncertainty analysis.                                                                                                                                                                                                                          | Web appendix page 55                     |
| 14                                                                                                    | State how analytic or statistical source code used to generate estimates can be accessed.                                                                                                                                                                                                                                                                                                 | Available on LSHTM data compass          |
| <b>Results and Discussion</b>                                                                         |                                                                                                                                                                                                                                                                                                                                                                                           |                                          |
| 15                                                                                                    | Provide published estimates in a file format from which data can be efficiently extracted.                                                                                                                                                                                                                                                                                                | Available on LSHTM data compass          |
| 16                                                                                                    | Report a quantitative measure of the uncertainty of the estimates (e.g. uncertainty intervals).                                                                                                                                                                                                                                                                                           | Paper pages 10-11                        |

|           |                                                                                                                                                          |                   |
|-----------|----------------------------------------------------------------------------------------------------------------------------------------------------------|-------------------|
| <b>17</b> | Interpret results in light of existing evidence. If updating a previous set of estimates, describe the reasons for changes in estimates.                 | Paper pages 11-13 |
| <b>18</b> | Discuss limitations of the estimates. Include a discussion of any modelling assumptions or data limitations that affect interpretation of the estimates. | Paper pages 11-12 |

Data source: Stevens et al<sup>1</sup>

## 2. Definitions and country groupings

Table 2.1: Countries by United Nations sub-regions

Source: United Nations

| Africa                           |                                    |                      |                            |                                  |                                |                          |                            |                                       |                     |
|----------------------------------|------------------------------------|----------------------|----------------------------|----------------------------------|--------------------------------|--------------------------|----------------------------|---------------------------------------|---------------------|
| Western Africa                   |                                    |                      | Eastern Africa             |                                  |                                | Middle Africa            |                            | Northern Africa                       | Southern Africa     |
| Benin                            | Liberia                            |                      | Burundi                    | Madagascar                       | Somalia                        | Angola                   | Democratic Republic of the | Algeria                               | Botswana            |
| Burkina Faso                     | Mali                               |                      | Comoros                    | Malawi                           | South Sudan                    | Cameroon                 | Congo                      | Egypt                                 | Lesotho             |
| Cabo Verde                       | Mauritania                         |                      | Djibouti                   | Mauritius                        | Uganda                         | Central African Republic | Equatorial Guinea          | Libya                                 | Namibia             |
| Côte d'Ivoire                    | Niger                              |                      | Eritrea                    | Mozambique                       | United Republic of Tanzania    | Chad                     | Gabon                      | Morocco                               | South Africa        |
| Gambia                           | Nigeria                            |                      | Ethiopia                   | Rwanda                           |                                | Congo                    | Sao Tome and Principe      | Sudan                                 | Swaziland           |
| Ghana                            | Senegal                            |                      | Kenya                      | Seychelles                       | Zambia                         |                          |                            | Tunisia                               |                     |
| Guinea                           | Sierra Leone                       |                      |                            |                                  | Zimbabwe                       |                          |                            |                                       |                     |
| Guinea-Bissau                    | Togo                               |                      |                            |                                  |                                |                          |                            |                                       |                     |
| Europe                           |                                    |                      |                            |                                  |                                |                          |                            |                                       |                     |
| Western Europe                   |                                    |                      | Southern Europe            |                                  |                                | Northern Europe          |                            |                                       | Eastern Europe      |
| Austria                          | Luxembourg                         |                      | Albania                    | Italy                            | Spain                          | Denmark                  | Latvia                     | Belarus                               | Republic of Moldova |
| Belgium                          | Monaco                             |                      | Andorra                    | Malta                            | The former                     | Estonia                  | Lithuania                  | Bulgaria                              | Romania             |
| France                           | Netherlands                        |                      | Bosnia and Herzegovina     | Montenegro                       | Yugoslav Republic of Macedonia | Finland                  | Norway                     | Czechia                               | Russian Federation  |
| Germany                          | Switzerland                        |                      | Croatia                    | Portugal                         | Republic of                    | Iceland                  | Sweden                     | Hungary                               | Slovakia            |
| Liechtenstein                    |                                    |                      | Greece                     | San Marino                       |                                | Ireland                  | United Kingdom             | Poland                                | Ukraine             |
|                                  |                                    |                      | Holy See                   | Slovenia                         |                                |                          |                            |                                       |                     |
| Latin America and the Caribbean  |                                    |                      |                            |                                  |                                |                          |                            |                                       |                     |
| South America                    |                                    |                      | Caribbean                  |                                  |                                |                          | Central America            |                                       |                     |
| Guyana                           | Colombia                           |                      | Haiti                      | Grenada                          |                                | Belize                   | Honduras                   |                                       |                     |
| Suriname                         | Ecuador                            |                      | Antigua and Barbuda        | Jamaica                          |                                | Costa Rica               | Mexico                     |                                       |                     |
| Argentina                        | Paraguay                           |                      | Bahamas                    | Saint Kitts and Nevis            |                                | El Salvador              | Nicaragua                  |                                       |                     |
| Bolivia (Plurinational State of) | Peru                               |                      | Barbados                   | Saint Lucia                      |                                | Guatemala                | Panama                     |                                       |                     |
| Brazil                           | Uruguay                            |                      | Cuba                       | Saint Vincent and the Grenadines |                                |                          |                            |                                       |                     |
| Chile                            | Venezuela (Bolivarian Republic of) |                      | Dominica                   | Trinidad and Tobago              |                                |                          |                            |                                       |                     |
|                                  |                                    |                      | Dominican Republic         |                                  |                                |                          |                            |                                       |                     |
| Asia                             |                                    |                      |                            |                                  |                                |                          |                            |                                       |                     |
| Western Asia                     |                                    |                      | Southern Asia              |                                  | South-Eastern Asia             |                          |                            | Eastern Asia                          | Central Asia        |
| Turkey                           | Oman                               | United Arab Emirates | Afghanistan                | Bhutan                           | Brunei                         | Myanmar                  | Philippines                | Democratic People's Republic of Korea | Kazakhstan          |
| Yemen                            | Qatar                              |                      | Bangladesh                 | Nepal                            | Darussalam                     | Lao People's             | Singapore                  | Mongolia                              | Kyrgyzstan          |
| Bahrain                          | Saudi Arabia                       | Cyprus               | Maldives                   | Sri Lanka                        | Indonesia                      | Democratic               | Thailand                   | Republic of Korea                     | Tajikistan          |
| Iraq                             | State of Israel                    |                      | Pakistan                   | India                            | Malaysia                       | Republic                 | Viet Nam                   | China                                 | Turkmenistan        |
| Jordan                           | Palestine                          | Azerbaijan           | Iran (Islamic Republic of) |                                  | Cambodia                       | Timor-Leste              |                            | Japan                                 | Uzbekistan          |
| Kuwait                           | Syrian Arab Republic               | Armenia              |                            |                                  |                                |                          |                            |                                       |                     |
| Lebanon                          | Georgia                            |                      |                            |                                  |                                |                          |                            |                                       |                     |
| Oceania                          |                                    |                      |                            |                                  |                                |                          |                            |                                       |                     |
| Polynesia                        |                                    | Micronesia           |                            | Melanesia                        |                                | Australia/New Zealand    |                            | Northern America                      |                     |
| Tuvalu                           | Samoa                              | Kiribati             | Nauru                      | Solomon Islands                  | Fiji                           | Australia                |                            | United States of America              |                     |
| Cook Islands                     | Tonga                              | Marshall Islands     | Palau                      | Vanuatu                          | Papua New Guinea               | New Zealand              |                            | Canada                                |                     |
| Niue                             |                                    | Micronesia           |                            |                                  |                                |                          |                            |                                       |                     |



### 3. Data – inclusion criteria and adjustments

#### Inclusion criteria

Population based national or nationally representative datasets containing information on birthweight or LBW rates without exclusion criteria and:

- For national routine data: a median year of birth from 2000 onwards.
- For household survey data a midpoint of data collection of 1998 or later, and for which raw datasets were publically available.

#### Exclusion criteria

- Sub-national or other non-population-based data such as those from demographic surveillance sites and individual hospital data.
- National administrative data covering less than 80% of the population, or from countries with less than 80% facility births in the data source year, or reporting a birthweight for less than 80% of the UN estimated livebirths in a given year.
- Survey data that were not nationally representative, or with less than 30% weighed at birth.
- Surveys assessed as inadequate data quality (see main paper for details).
- Data assessed to be implausible (see main paper for details).

#### Survey low birthweight estimate adjustments

Preparation of datasets: Birthweights reported to be <250g or >5500g were considered to be implausible and such births were treated as missing birthweights in the datasets for all analyses.

Missing birthweights were imputed using the Multiple Imputation (MI) command in Stata. The imputation model included the following variables: (i) mother's perception of size at birth, and (ii) maternal parity for MICS and these same variables plus (iii) sex of child, (iv) multiple/singleton status, (v) maternal height and (vi) maternal body mass index (BMI) for DHS. Five imputations were performed for each survey.

Two normal distributions were fitted to each dataset, and the mean birthweight and standard deviation were calculated for each of these distributions. These were then used to calculate the LBW Z-score. The %LBW for each of the distributions was calculated as the % area under the curve <  $Z_{2,500}$ . The overall %LBW for the dataset was calculated as the weighted average of %LBW from each distribution, based on the proportion of the population estimated to belong to each sub-population.



## 4. Data - final inputs

Table 4.1: Nationally-representative survey data meeting inclusion criteria (N=229<sup>1</sup>)

| Country | Data source | Year Published <sup>1</sup> | Number of births captured in the survey | Proportion of births weighed | LBW estimate from the survey |
|---------|-------------|-----------------------------|-----------------------------------------|------------------------------|------------------------------|
| ALB     | MICS        | 2000                        | 254                                     | 0.87                         | 4.0                          |
| ALB     | MICS        | 2005                        | 395                                     | 0.97                         | 7.0                          |
| ALB     | DHS         | 2008                        | 1616                                    | 0.98                         | 4.6                          |
| DZA     | MICS        | 2012                        | 5978                                    | 0.89                         | 6.8                          |
| AGO     | MICS        | 2001                        | 1308                                    | 0.45                         | 17.9                         |
| ARM     | DHS         | 2000                        | 1726                                    | 0.96                         | 8.6                          |
| ARM     | DHS         | 2005                        | 1430                                    | 0.98                         | 9.2                          |
| ARM     | DHS         | 2010                        | 1473                                    | 0.98                         | 7.4                          |
| ARM     | DHS         | 2015                        | 1706                                    | 1                            | 7.1                          |
| AZE     | DHS         | 2006                        | 2297                                    | 0.73                         | 11.3                         |
| BGD     | MICS        | 2013                        | 7866                                    | 0.32                         | 30.2                         |
| BLR     | MICS        | 2005                        | 1179                                    | 0.99                         | 4.0                          |
| BLR     | MICS        | 2012                        | 1324                                    | 1                            | 4.4                          |
| BLZ     | MICS        | 2006                        | 312                                     | 0.95                         | 8.9                          |
| BEN     | DHS         | 2001                        | 5321                                    | 0.57                         | 19.7                         |
| BEN     | DHS         | 2006                        | 16075                                   | 0.59                         | 17.8                         |
| BEN     | DHS         | 2011                        | 13407                                   | 0.61                         | 19.5                         |
| BEN     | MICS        | 2014                        | 5052                                    | 0.73                         | 15.0                         |
| BTN     | MICS        | 2010                        | 2465                                    | 0.72                         | 11.6                         |
| BOL     | DHS         | 1998                        | 7275                                    | 0.59                         | 10.8                         |
| BOL     | MICS        | 2000                        | 876                                     | 0.72                         | 5.4                          |
| BOL     | DHS         | 2003                        | 10417                                   | 0.6                          | 9.3                          |
| BOL     | DHS         | 2008                        | 8605                                    | 0.71                         | 7.4                          |
| BIH     | MICS        | 2006                        | 1174                                    | 0.99                         | 4.9                          |
| BIH     | MICS        | 2011                        | 718                                     | 0.98                         | 3.1                          |
| BFA     | MICS        | 2006                        | 2384                                    | 0.39                         | 20.0                         |
| BFA     | DHS         | 2010                        | 15044                                   | 0.64                         | 19.5                         |
| BDI     | MICS        | 2000                        | 882                                     | 0.39                         | 18.0                         |
| BDI     | DHS         | 2010                        | 7742                                    | 0.57                         | 15.5                         |
| KHM     | DHS         | 2005                        | 8290                                    | 0.39                         | 16.3                         |
| KHM     | DHS         | 2010                        | 8232                                    | 0.72                         | 12.8                         |
| KHM     | DHS         | 2014                        | 7153                                    | 0.91                         | 11.7                         |
| CMR     | DHS         | 1998                        | 2297                                    | 0.51                         | 11.3                         |
| CMR     | MICS        | 2000                        | 904                                     | 0.5                          | 13.8                         |
| CMR     | DHS         | 2004                        | 8090                                    | 0.56                         | 15.0                         |
| CMR     | MICS        | 2006                        | 2878                                    | 0.59                         | 14.0                         |
| CMR     | MICS        | 2014                        | 2899                                    | 0.6                          | 10.7                         |
| CAF     | MICS        | 2000                        | 3595                                    | 0.48                         | 15.5                         |
| CAF     | MICS        | 2006                        | 4129                                    | 0.56                         | 15.3                         |
| CAF     | MICS        | 2010                        | 4545                                    | 0.61                         | 14.8                         |
| CHN     | Survey      | 2008                        | 7646                                    | 0.99                         | 4.7                          |
| CHN     | Survey      | 2013                        | 11904                                   | 1                            | 5.2                          |
| COL     | DHS         | 2000                        | 4659                                    | 0.73                         | 9.1                          |

<sup>1</sup> The 229 surveys include those from one country (India) for which only partial data were available for the most recent survey; and the individual adjusted survey estimates for this country are not shown in the table above

| Country | Data source | Year Published <sup>1</sup> | Number of births captured in the survey | Proportion of births weighed | LBW estimate from the survey |
|---------|-------------|-----------------------------|-----------------------------------------|------------------------------|------------------------------|
| COL     | DHS         | 2005                        | 14621                                   | 0.74                         | 10.2                         |
| COL     | DHS         | 2010                        | 17756                                   | 0.76                         | 11.6                         |
| COL     | DHS         | 2015                        | 11647                                   | 0.82                         | 11.4                         |
| COM     | MICS        | 2000                        | 1231                                    | 0.44                         | 30.2                         |
| COM     | DHS         | 2012                        | 3149                                    | 0.67                         | 22.6                         |
| COG     | DHS         | 2005                        | 4835                                    | 0.85                         | 13.9                         |
| COG     | DHS         | 2011                        | 9329                                    | 0.91                         | 11.5                         |
| CRI     | MICS        | 2011                        | 854                                     | 0.98                         | 7.4                          |
| CIV     | DHS         | 1998                        | 1991                                    | 0.54                         | 20.5                         |
| CIV     | MICS        | 2000                        | 2139                                    | 0.71                         | 19.8                         |
| CIV     | MICS        | 2006                        | 3711                                    | 0.59                         | 19.2                         |
| CIV     | DHS         | 2011                        | 7776                                    | 0.6                          | 19.2                         |
| CUB     | MICS        | 2014                        | 2193                                    | 0.95                         | 6.2                          |
| COD     | MICS        | 2001                        | 2614                                    | 0.5                          | 13.6                         |
| COD     | DHS         | 2007                        | 8992                                    | 0.68                         | 12.0                         |
| COD     | MICS        | 2010                        | 4809                                    | 0.7                          | 11.5                         |
| COD     | DHS         | 2013                        | 18640                                   | 0.76                         | 9.6                          |
| DOM     | DHS         | 1999                        | 595                                     | 0.97                         | 8.6                          |
| DOM     | MICS        | 2000                        | 435                                     | 0.95                         | 15.3                         |
| DOM     | DHS         | 2002                        | 11201                                   | 0.98                         | 9.9                          |
| DOM     | DHS         | 2007                        | 11149                                   | 0.96                         | 9.6                          |
| DOM     | DHS         | 2013                        | 3708                                    | 0.98                         | 15.9                         |
| DOM     | MICS        | 2014                        | 7566                                    | 0.96                         | 12.4                         |
| SLV     | MICS        | 2014                        | 2832                                    | 0.93                         | 9.8                          |
| GAB     | DHS         | 2000                        | 4405                                    | 0.88                         | 15.1                         |
| GAB     | DHS         | 2012                        | 6067                                    | 0.91                         | 15.1                         |
| GMB     | DHS         | 2013                        | 8088                                    | 0.59                         | 17.7                         |
| GEO     | MICS        | 2005                        | 760                                     | 0.96                         | 5.0                          |
| GHA     | MICS        | 2006                        | 1459                                    | 0.36                         | 15.1                         |
| GHA     | DHS         | 2008                        | 2992                                    | 0.43                         | 16.8                         |
| GHA     | MICS        | 2011                        | 2873                                    | 0.54                         | 14.1                         |
| GHA     | DHS         | 2014                        | 5881                                    | 0.6                          | 14.1                         |
| GTM     | DHS         | 1999                        | 4923                                    | 0.78                         | 12.2                         |
| GTM     | DHS         | 2015                        | 12435                                   | 0.94                         | 13.7                         |
| GNB     | MICS        | 2006                        | 2455                                    | 0.41                         | 25.5                         |
| GNB     | MICS        | 2014                        | 3196                                    | 0.44                         | 21.1                         |
| GUY     | MICS        | 2000                        | 497                                     | 0.79                         | 15.1                         |
| GUY     | MICS        | 2006                        | 917                                     | 0.78                         | 20.5                         |
| GUY     | DHS         | 2009                        | 2178                                    | 0.84                         | 15.2                         |
| GUY     | MICS        | 2014                        | 1258                                    | 0.89                         | 14.8                         |
| HND     | DHS         | 2005                        | 10800                                   | 0.69                         | 11.3                         |
| HND     | DHS         | 2011                        | 10888                                   | 0.83                         | 12.0                         |
| IDN     | DHS         | 1997                        | 17443                                   | 0.62                         | 11.8                         |
| IDN     | DHS         | 2002                        | 16206                                   | 0.78                         | 10.9                         |
| IDN     | DHS         | 2007                        | 18645                                   | 0.82                         | 10.7                         |
| IDN     | DHS         | 2012                        | 17874                                   | 0.9                          | 10.7                         |
| JAM     | MICS        | 2005                        | 538                                     | 0.97                         | 16.2                         |
| JAM     | MICS        | 2011                        | 630                                     | 0.96                         | 16.2                         |
| JOR     | DHS         | 1997                        | 6490                                    | 0.95                         | 13.7                         |
| JOR     | DHS         | 2002                        | 6073                                    | 0.98                         | 14.0                         |
| JOR     | DHS         | 2007                        | 10426                                   | 0.99                         | 13.9                         |

| Country | Data source | Year Published <sup>1</sup> | Number of births captured in the survey | Proportion of births weighed | LBW estimate from the survey |
|---------|-------------|-----------------------------|-----------------------------------------|------------------------------|------------------------------|
| JOR     | DHS         | 2009                        | 9650                                    | 0.99                         | 14.7                         |
| JOR     | DHS         | 2012                        | 10360                                   | 0.99                         | 16.9                         |
| KAZ     | DHS         | 1999                        | 1345                                    | 0.97                         | 8.8                          |
| KAZ     | MICS        | 2006                        | 1784                                    | 0.99                         | 5.8                          |
| KAZ     | MICS        | 2010                        | 2027                                    | 0.97                         | 4.7                          |
| KAZ     | MICS        | 2015                        | 2106                                    | 0.99                         | 4.6                          |
| KEN     | DHS         | 1998                        | 3511                                    | 0.45                         | 13.6                         |
| KEN     | DHS         | 2003                        | 5949                                    | 0.44                         | 12.2                         |
| KEN     | DHS         | 2014                        | 10048                                   | 0.66                         | 10.5                         |
| KGZ     | DHS         | 1997                        | 1127                                    | 0.97                         | 8.0                          |
| KGZ     | MICS        | 2005                        | 1152                                    | 0.97                         | 6.3                          |
| KGZ     | DHS         | 2012                        | 4339                                    | 0.99                         | 6.9                          |
| KGZ     | MICS        | 2014                        | 1766                                    | 0.98                         | 5.5                          |
| LAO     | MICS        | 2011                        | 4444                                    | 0.42                         | 19.1                         |
| LSO     | MICS        | 2000                        | 851                                     | 0.63                         | 16.6                         |
| LSO     | DHS         | 2004                        | 3658                                    | 0.63                         | 14.9                         |
| LSO     | DHS         | 2009                        | 3995                                    | 0.74                         | 15.2                         |
| LSO     | DHS         | 2014                        | 3136                                    | 0.83                         | 13.9                         |
| MDG     | DHS         | 1997                        | 3651                                    | 0.34                         | 22.1                         |
| MDG     | MICS        | 2000                        | 1231                                    | 0.34                         | 17.5                         |
| MDG     | DHS         | 2003                        | 5266                                    | 0.37                         | 21.3                         |
| MDG     | DHS         | 2008                        | 12448                                   | 0.4                          | 18.7                         |
| MWI     | DHS         | 2000                        | 11880                                   | 0.45                         | 17.7                         |
| MWI     | DHS         | 2004                        | 10914                                   | 0.49                         | 16.5                         |
| MWI     | MICS        | 2006                        | 10374                                   | 0.48                         | 15.6                         |
| MWI     | DHS         | 2010                        | 19967                                   | 0.66                         | 15.3                         |
| MWI     | MICS        | 2013                        | 7576                                    | 0.83                         | 14.8                         |
| MWI     | DHS         | 2016                        | 17148                                   | 0.84                         | 15.3                         |
| MDV     | DHS         | 2009                        | 3817                                    | 0.98                         | 13.6                         |
| MEX     | MICS        | 2015                        | 3032                                    | 0.98                         | 10.3                         |
| MNG     | MICS        | 2000                        | 1515                                    | 0.95                         | 6.5                          |
| MNG     | MICS        | 2005                        | 1460                                    | 0.98                         | 6.0                          |
| MNG     | MICS        | 2010                        | 1690                                    | 0.98                         | 5.3                          |
| MNG     | MICS        | 2014                        | 2375                                    | 0.99                         | 5.3                          |
| MNE     | MICS        | 2005                        | 351                                     | 0.96                         | 4.0                          |
| MNE     | MICS        | 2013                        | 494                                     | 0.99                         | 3.7                          |
| MAR     | DHS         | 2003                        | 6156                                    | 0.49                         | 19.5                         |
| MOZ     | DHS         | 1997                        | 3999                                    | 0.4                          | 20.7                         |
| MOZ     | DHS         | 2003                        | 10275                                   | 0.46                         | 18.0                         |
| MOZ     | DHS         | 2011                        | 11102                                   | 0.51                         | 20.6                         |
| MMR     | DHS         | 2015                        | 4813                                    | 0.45                         | 12.7                         |
| NAM     | DHS         | 2000                        | 3911                                    | 0.68                         | 15.8                         |
| NAM     | DHS         | 2006                        | 5064                                    | 0.77                         | 16.9                         |
| NAM     | DHS         | 2013                        | 5013                                    | 0.86                         | 16.3                         |
| NPL     | DHS         | 2011                        | 5306                                    | 0.36                         | 19.9                         |
| NPL     | MICS        | 2014                        | 2086                                    | 0.59                         | 28.7                         |
| NPL     | DHS         | 2016                        | 4994                                    | 0.61                         | 20.4                         |
| NIC     | DHS         | 1998                        | 8273                                    | 0.75                         | 12.0                         |
| NIC     | DHS         | 2001                        | 6918                                    | 0.71                         | 11.9                         |
| PAN     | MICS        | 2013                        | 2278                                    | 0.91                         | 8.9                          |
| PRY     | MICS        | 2016                        | 1745                                    | 0.97                         | 10.0                         |

| Country | Data source | Year Published <sup>1</sup> | Number of births captured in the survey | Proportion of births weighed | LBW estimate from the survey |
|---------|-------------|-----------------------------|-----------------------------------------|------------------------------|------------------------------|
| PER     | DHS         | 2000                        | 13658                                   | 0.7                          | 11.5                         |
| PER     | DHS         | 2004                        | 17189                                   | 0.84                         | 10.0                         |
| PER     | DHS         | 2008                        | 17189                                   | 0.84                         | 10.0                         |
| PER     | DHS         | 2009                        | 10289                                   | 0.9                          | 9.4                          |
| PER     | DHS         | 2010                        | 9281                                    | 0.9                          | 10.1                         |
| PER     | DHS         | 2011                        | 9146                                    | 0.91                         | 8.8                          |
| PER     | DHS         | 2012                        | 9620                                    | 0.93                         | 9.3                          |
| PHL     | DHS         | 1998                        | 8083                                    | 0.59                         | 19.0                         |
| PHL     | DHS         | 2003                        | 7095                                    | 0.68                         | 21.2                         |
| PHL     | DHS         | 2008                        | 6572                                    | 0.73                         | 21.9                         |
| PHL     | DHS         | 2013                        | 7216                                    | 0.81                         | 25.5                         |
| MDA     | DHS         | 2005                        | 1552                                    | 0.99                         | 6.5                          |
| MDA     | MICS        | 2012                        | 723                                     | 0.99                         | 5.8                          |
| RWA     | DHS         | 2005                        | 8649                                    | 0.3                          | 8.2                          |
| RWA     | DHS         | 2010                        | 9002                                    | 0.68                         | 8.7                          |
| RWA     | DHS         | 2014                        | 7848                                    | 0.92                         | 8.9                          |
| STP     | DHS         | 2008                        | 1931                                    | 0.82                         | 8.8                          |
| STP     | MICS        | 2014                        | 758                                     | 0.93                         | 8.6                          |
| SEN     | DHS         | 1997                        | 7341                                    | 0.35                         | 19.7                         |
| SEN     | DHS         | 2005                        | 10887                                   | 0.47                         | 22.9                         |
| SEN     | DHS         | 2010                        | 12326                                   | 0.61                         | 22.0                         |
| SEN     | DHS         | 2012                        | 6862                                    | 0.54                         | 20.6                         |
| SEN     | DHS         | 2014                        | 6842                                    | 0.52                         | 19.4                         |
| SEN     | DHS         | 2015                        | 6935                                    | 0.55                         | 18.6                         |
| SEN     | DHS         | 2016                        | 6725                                    | 0.53                         | 16.7                         |
| SRB     | MICS        | 2005                        | 1445                                    | 0.98                         | 4.9                          |
| SRB     | MICS        | 2010                        | 1187                                    | 1                            | 5.9                          |
| SRB     | MICS        | 2014                        | 959                                     | 0.98                         | 5.2                          |
| SLE     | DHS         | 2008                        | 5631                                    | 0.33                         | 19.6                         |
| SLE     | MICS        | 2010                        | 3415                                    | 0.4                          | 14.3                         |
| SLE     | DHS         | 2013                        | 11938                                   | 0.48                         | 13.5                         |
| ZAF     | DHS         | 1998                        | 4942                                    | 0.7                          | 14.7                         |
| SUR     | MICS        | 2000                        | 408                                     | 0.78                         | 14.5                         |
| SUR     | MICS        | 2006                        | 798                                     | 0.74                         | 11.9                         |
| SUR     | MICS        | 2010                        | 1265                                    | 0.81                         | 15.6                         |
| SWZ     | MICS        | 2000                        | 807                                     | 0.72                         | 13.8                         |
| SWZ     | DHS         | 2006                        | 2812                                    | 0.84                         | 10.2                         |
| SWZ     | MICS        | 2010                        | 1018                                    | 0.91                         | 10.5                         |
| SWZ     | MICS        | 2014                        | 987                                     | 0.91                         | 8.8                          |
| TJK     | MICS        | 2000                        | 827                                     | 0.47                         | 16.2                         |
| TJK     | MICS        | 2005                        | 1622                                    | 0.66                         | 11.0                         |
| TJK     | DHS         | 2012                        | 4963                                    | 0.84                         | 8.8                          |
| THA     | MICS        | 2005                        | 3365                                    | 0.99                         | 10.2                         |
| THA     | MICS        | 2012                        | 2762                                    | 0.99                         | 9.2                          |
| MKD     | MICS        | 2005                        | 1436                                    | 0.93                         | 6.8                          |
| MKD     | MICS        | 2011                        | 503                                     | 0.96                         | 6.8                          |
| TGO     | MICS        | 2000                        | 757                                     | 0.35                         | 24.2                         |
| TGO     | MICS        | 2006                        | 1751                                    | 0.44                         | 14.9                         |
| TGO     | DHS         | 2013                        | 6947                                    | 0.6                          | 14.3                         |
| TTO     | MICS        | 2006                        | 415                                     | 0.9                          | 16.6                         |
| TUN     | MICS        | 2011                        | 1135                                    | 0.97                         | 7.2                          |

| Country | Data source | Year Published <sup>1</sup> | Number of births captured in the survey | Proportion of births weighed | LBW estimate from the survey |
|---------|-------------|-----------------------------|-----------------------------------------|------------------------------|------------------------------|
| TUR     | DHS         | 1998                        | 3543                                    | 0.65                         | 17.4                         |
| TUR     | DHS         | 2003                        | 4492                                    | 0.71                         | 17.0                         |
| TKM     | MICS        | 2015                        | 1467                                    | 0.99                         | 3.6                          |
| UKR     | MICS        | 2005                        | 1128                                    | 1                            | 4.2                          |
| UKR     | DHS         | 2007                        | 1221                                    | 0.99                         | 4.4                          |
| UKR     | MICS        | 2012                        | 1564                                    | 0.97                         | 3.5                          |
| TZA     | DHS         | 1999                        | 3206                                    | 0.44                         | 15.4                         |
| TZA     | DHS         | 2004                        | 8564                                    | 0.5                          | 10.9                         |
| TZA     | DHS         | 2010                        | 8023                                    | 0.53                         | 10.1                         |
| TZA     | DHS         | 2015                        | 10143                                   | 0.64                         | 10.6                         |
| URY     | MICS        | 2012                        | 433                                     | 0.94                         | 15.1                         |
| UZB     | MICS        | 2000                        | 686                                     | 0.94                         | 6.7                          |
| UZB     | MICS        | 2006                        | 2095                                    | 0.99                         | 5.4                          |
| VUT     | MICS        | 2007                        | 680                                     | 0.79                         | 11.4                         |
| VNM     | DHS         | 1997                        | 1775                                    | 0.58                         | 11.9                         |
| VNM     | MICS        | 2000                        | 550                                     | 0.7                          | 11.6                         |
| VNM     | DHS         | 2002                        | 1316                                    | 0.8                          | 10.2                         |
| VNM     | MICS        | 2006                        | 1023                                    | 0.87                         | 7.5                          |
| VNM     | MICS        | 2010                        | 1363                                    | 0.93                         | 7.0                          |
| VNM     | MICS        | 2013                        | 1484                                    | 0.94                         | 7.1                          |
| PSE     | MICS        | 2014                        | 2891                                    | 1                            | 8.9                          |
| ZMB     | MICS        | 1999                        | 1361                                    | 0.55                         | 13.1                         |
| ZMB     | DHS         | 2001                        | 6857                                    | 0.42                         | 14.5                         |
| ZMB     | DHS         | 2007                        | 6401                                    | 0.48                         | 12.2                         |
| ZMB     | DHS         | 2013                        | 13399                                   | 0.66                         | 11.7                         |
| ZWE     | DHS         | 1999                        | 3643                                    | 0.76                         | 13.2                         |
| ZWE     | DHS         | 2005                        | 5246                                    | 0.72                         | 12.7                         |
| ZWE     | MICS        | 2006                        | 2850                                    | 0.66                         | 12.5                         |
| ZWE     | DHS         | 2010                        | 5563                                    | 0.69                         | 13.3                         |
| ZWE     | MICS        | 2014                        | 3913                                    | 0.83                         | 11.4                         |
| ZWE     | DHS         | 2015                        | 6075                                    | 0.82                         | 12.8                         |

<sup>1</sup> Year of publication is provided here. However for the purposes of estimation the median data year of the recall period is used e.g. for surveys with 3-year recall period the year of data collection, the data year used= (year of publication-1), for surveys with a 5-year recall the data year = (year of publication-2).

Table 4.2: Administrative data meeting inclusion criteria (N=1218)

| ISO3 code | Data source                       | Year of data collection | Reported low birthweight rate | Number of weighed livebirths | National representativeness |
|-----------|-----------------------------------|-------------------------|-------------------------------|------------------------------|-----------------------------|
| ALB       | National Statistical Office       | 2000                    | 5.0                           | 51250                        | Higher coverage             |
| ALB       | National Statistical Office       | 2001                    | 4.6                           | 53210                        | Higher coverage             |
| ALB       | National Statistical Office       | 2002                    | 4.3                           | 42530                        | Higher coverage             |
| ALB       | National Statistical Office       | 2003                    | 4.8                           | 45320                        | Higher coverage             |
| ALB       | National Statistical Office       | 2004                    | 4.8                           | 40990                        | Higher coverage             |
| ALB       | National Statistical Office       | 2005                    | 3.7                           | 38900                        | Higher coverage             |
| ALB       | National Statistical Office       | 2006                    | 4.1                           | 35900                        | Higher coverage             |
| ALB       | National Statistical Office       | 2007                    | 4.3                           | 34450                        | Higher coverage             |
| ALB       | National Statistical Office       | 2008                    | 5.4                           | 33450                        | Higher coverage             |
| ALB       | National Statistical Office       | 2009                    | 4.0                           | 34120                        | Higher coverage             |
| ALB       | National Statistical Office       | 2010                    | 5.5                           | 34070                        | Higher coverage             |
| ALB       | General Directory of Civil Status | 2012                    | 6.3                           | 35480                        | Higher coverage             |
| ALB       | General Directory of Civil Status | 2013                    | 6.2                           | 35750                        | Higher coverage             |
| ALB       | General Directory of Civil Status | 2014                    | 4.7                           | 35760                        | Higher coverage             |
| ALB       | General Directory of Civil Status | 2015                    | 5.2                           | 32720                        | Higher coverage             |
| AND       | National Statistical Office       | 2000                    | 7.6                           | 760                          | Higher coverage             |
| AND       | National Statistical Office       | 2001                    | 7.7                           | 760                          | Higher coverage             |
| AND       | National Statistical Office       | 2002                    | 6.7                           | 780                          | Higher coverage             |
| AND       | National Statistical Office       | 2003                    | 8.5                           | 750                          | Higher coverage             |
| AND       | National Statistical Office       | 2004                    | 7.5                           | 820                          | Higher coverage             |
| AND       | National Statistical Office       | 2005                    | 6.6                           | 820                          | Higher coverage             |
| AND       | National Statistical Office       | 2006                    | 5.9                           | 840                          | Higher coverage             |
| AND       | National Statistical Office       | 2007                    | 6.3                           | 820                          | Higher coverage             |
| AND       | National Statistical Office       | 2008                    | 6.8                           | 870                          | Higher coverage             |
| AND       | National Statistical Office       | 2009                    | 9.9                           | 840                          | Higher coverage             |
| AND       | National Statistical Office       | 2010                    | 7.9                           | 830                          | Higher coverage             |
| AND       | National Statistical Office       | 2011                    | 9.0                           | 800                          | Higher coverage             |
| AND       | National Statistical Office       | 2012                    | 7.8                           | 740                          | Higher coverage             |
| ARE       | Ministry of Health & Prevention   | 2015                    | 11.5                          | 89110                        | Higher coverage             |
| ARG       | National Statistical Office       | 2000                    | 7.2                           | 701880                       | Higher coverage             |
| ARG       | National Statistical Office       | 2001                    | 7.4                           | 683500                       | Higher coverage             |
| ARG       | National Statistical Office       | 2002                    | 7.8                           | 694690                       | Higher coverage             |
| ARG       | National Statistical Office       | 2003                    | 8.0                           | 697960                       | Higher coverage             |
| ARG       | National Statistical Office       | 2004                    | 7.6                           | 736270                       | Higher coverage             |
| ARG       | National Statistical Office       | 2005                    | 7.3                           | 712220                       | Higher coverage             |
| ARG       | National Statistical Office       | 2006                    | 7.2                           | 696460                       | Higher coverage             |
| ARG       | National Statistical Office       | 2007                    | 7.2                           | 700800                       | Higher coverage             |
| ARG       | National Statistical Office       | 2008                    | 7.3                           | 746460                       | Higher coverage             |
| ARG       | National Statistical Office       | 2009                    | 7.1                           | 745340                       | Higher coverage             |
| ARG       | National Statistical Office       | 2010                    | 7.2                           | 756180                       | Higher coverage             |

| ISO3 code | Data source                    | Year of data collection | Reported low birthweight rate | Number of weighed livebirths | National representativeness |
|-----------|--------------------------------|-------------------------|-------------------------------|------------------------------|-----------------------------|
| ARG       | National Statistical Office    | 2011                    | 7.2                           | 758050                       | Higher coverage             |
| ARG       | National Statistical Office    | 2012                    | 7.2                           | 738320                       | Higher coverage             |
| ARG       | National Statistical Office    | 2013                    | 7.4                           | 754610                       | Higher coverage             |
| ARG       | National Statistical Office    | 2014                    | 7.2                           | 777020                       | Higher coverage             |
| ARG       | National Statistical Office    | 2015                    | 7.2                           | 770040                       | Higher coverage             |
| ARM       | Ministry of Health             | 2000                    | 8.5                           | 34280                        | Moderate coverage           |
| ARM       | Ministry of Health             | 2001                    | 7.3                           | 32070                        | Moderate coverage           |
| ARM       | Ministry of Health             | 2002                    | 8.0                           | 32230                        | Moderate coverage           |
| ARM       | Ministry of Health             | 2003                    | 8.2                           | 35800                        | Moderate coverage           |
| ARM       | Ministry of Health             | 2004                    | 7.5                           | 37520                        | Higher coverage             |
| ARM       | Ministry of Health             | 2005                    | 7.3                           | 37500                        | Moderate coverage           |
| ARM       | Ministry of Health             | 2006                    | 7.7                           | 37640                        | Moderate coverage           |
| ARM       | Ministry of Health             | 2007                    | 7.3                           | 40110                        | Higher coverage             |
| ARM       | Ministry of Health             | 2008                    | 7.4                           | 41190                        | Higher coverage             |
| ARM       | Ministry of Health             | 2009                    | 7.5                           | 44420                        | Higher coverage             |
| ARM       | Ministry of Health             | 2010                    | 7.5                           | 44830                        | Higher coverage             |
| ARM       | Ministry of Health             | 2011                    | 7.7                           | 43340                        | Higher coverage             |
| ARM       | Ministry of Health             | 2012                    | 7.9                           | 42480                        | Higher coverage             |
| ARM       | Ministry of Health             | 2013                    | 8.1                           | 41790                        | Higher coverage             |
| ARM       | Ministry of Health             | 2014                    | 9.2                           | 43070                        | Higher coverage             |
| ARM       | Ministry of Health             | 2015                    | 8.6                           | 41850                        | Higher coverage             |
| ATG       | Ministry of Health             | 2000                    | 8.6                           | 1520                         | Moderate coverage           |
| ATG       | Ministry of Health             | 2001                    | 6.5                           | 1480                         | Moderate coverage           |
| ATG       | Ministry of Health             | 2008                    | 8.0                           | 1440                         | Moderate coverage           |
| ATG       | Ministry of Health             | 2009                    | 8.6                           | 1420                         | Moderate coverage           |
| AUS       | Australia's mothers and babies | 2000                    | 6.3                           | 255440                       | Higher coverage             |
| AUS       | Australia's mothers and babies | 2001                    | 6.2                           | 252580                       | Higher coverage             |
| AUS       | Australia's mothers and babies | 2002                    | 6.4                           | 253390                       | Higher coverage             |
| AUS       | Australia's mothers and babies | 2003                    | 6.3                           | 255100                       | Higher coverage             |
| AUS       | Australia's mothers and babies | 2004                    | 6.4                           | 255290                       | Higher coverage             |
| AUS       | Australia's mothers and babies | 2005                    | 6.4                           | 270440                       | Higher coverage             |
| AUS       | Australia's mothers and babies | 2006                    | 6.4                           | 280080                       | Higher coverage             |
| AUS       | Australia's mothers and babies | 2007                    | 6.2                           | 292030                       | Higher coverage             |
| AUS       | Australia's mothers and babies | 2008                    | 6.1                           | 294740                       | Higher coverage             |
| AUS       | Australia's mothers and babies | 2009                    | 6.2                           | 296800                       | Higher coverage             |
| AUS       | Australia's mothers and babies | 2010                    | 6.2                           | 297360                       | Higher coverage             |
| AUS       | Australia's mothers and babies | 2011                    | 6.3                           | 299590                       | Higher coverage             |
| AUS       | Australia's mothers and babies | 2012                    | 6.2                           | 309870                       | Higher coverage             |
| AUS       | Australia's mothers and babies | 2013                    | 6.4                           | 307300                       | Higher coverage             |
| AUS       | Australia's mothers and babies | 2014                    | 6.4                           | 310350                       | Higher coverage             |
| AUS       | Australia's mothers and babies | 2015                    | 6.5                           | 306730                       | Higher coverage             |

| <b>ISO3 code</b> | <b>Data source</b>          | <b>Year of data collection</b> | <b>Reported low birthweight rate</b> | <b>Number of weighed livebirths</b> | <b>National representativeness</b> |
|------------------|-----------------------------|--------------------------------|--------------------------------------|-------------------------------------|------------------------------------|
| AUT              | National Statistical Office | 2000                           | 6.3                                  | 78270                               | Higher coverage                    |
| AUT              | National Statistical Office | 2001                           | 6.7                                  | 75460                               | Higher coverage                    |
| AUT              | National Statistical Office | 2002                           | 6.6                                  | 78400                               | Higher coverage                    |
| AUT              | National Statistical Office | 2003                           | 7.1                                  | 76950                               | Higher coverage                    |
| AUT              | National Statistical Office | 2004                           | 6.8                                  | 78970                               | Higher coverage                    |
| AUT              | National Statistical Office | 2005                           | 6.8                                  | 78190                               | Higher coverage                    |
| AUT              | National Statistical Office | 2006                           | 7.1                                  | 77920                               | Higher coverage                    |
| AUT              | National Statistical Office | 2007                           | 7.2                                  | 76250                               | Higher coverage                    |
| AUT              | National Statistical Office | 2008                           | 7.1                                  | 77760                               | Higher coverage                    |
| AUT              | National Statistical Office | 2009                           | 7.1                                  | 76350                               | Higher coverage                    |
| AUT              | National Statistical Office | 2010                           | 7.0                                  | 78750                               | Higher coverage                    |
| AUT              | National Statistical Office | 2011                           | 6.9                                  | 78110                               | Higher coverage                    |
| AUT              | National Statistical Office | 2012                           | 6.8                                  | 78960                               | Higher coverage                    |
| AUT              | National Statistical Office | 2013                           | 6.8                                  | 79330                               | Higher coverage                    |
| AUT              | National Statistical Office | 2014                           | 6.6                                  | 81730                               | Higher coverage                    |
| AUT              | National Statistical Office | 2015                           | 6.5                                  | 84390                               | Higher coverage                    |
| AZE              | National Statistical Office | 2000                           | 6.6                                  | 117000                              | Moderate coverage                  |
| AZE              | National Statistical Office | 2001                           | 6.7                                  | 110360                              | Moderate coverage                  |
| AZE              | National Statistical Office | 2002                           | 7.2                                  | 110720                              | Moderate coverage                  |
| AZE              | National Statistical Office | 2003                           | 7.0                                  | 113470                              | Moderate coverage                  |
| AZE              | National Statistical Office | 2004                           | 7.8                                  | 131610                              | Higher coverage                    |
| AZE              | National Statistical Office | 2005                           | 7.7                                  | 141910                              | Higher coverage                    |
| AZE              | National Statistical Office | 2006                           | 7.3                                  | 148950                              | Higher coverage                    |
| AZE              | National Statistical Office | 2007                           | 7.2                                  | 151970                              | Higher coverage                    |
| AZE              | National Statistical Office | 2008                           | 6.9                                  | 152090                              | Higher coverage                    |
| AZE              | National Statistical Office | 2009                           | 7.1                                  | 152140                              | Higher coverage                    |
| AZE              | National Statistical Office | 2010                           | 7.4                                  | 165650                              | Higher coverage                    |
| AZE              | National Statistical Office | 2011                           | 7.3                                  | 176080                              | Higher coverage                    |
| AZE              | National Statistical Office | 2012                           | 6.9                                  | 174470                              | Higher coverage                    |
| AZE              | National Statistical Office | 2013                           | 7.0                                  | 172680                              | Higher coverage                    |
| BEL              | National Statistical Office | 2000                           | 7.0                                  | 116400                              | Higher coverage                    |
| BEL              | National Statistical Office | 2001                           | 7.3                                  | 115380                              | Higher coverage                    |
| BEL              | National Statistical Office | 2002                           | 7.4                                  | 113100                              | Higher coverage                    |
| BEL              | National Statistical Office | 2003                           | 7.4                                  | 114010                              | Higher coverage                    |
| BEL              | National Statistical Office | 2004                           | 6.9                                  | 117300                              | Higher coverage                    |
| BEL              | National Statistical Office | 2005                           | 7.0                                  | 119630                              | Higher coverage                    |
| BEL              | National Statistical Office | 2006                           | 7.1                                  | 122530                              | Higher coverage                    |
| BEL              | National Statistical Office | 2007                           | 6.8                                  | 124100                              | Higher coverage                    |
| BEL              | National Statistical Office | 2008                           | 6.9                                  | 127210                              | Higher coverage                    |
| BEL              | National Statistical Office | 2009                           | 7.0                                  | 127200                              | Higher coverage                    |
| BEL              | National Statistical Office | 2010                           | 7.0                                  | 129180                              | Higher coverage                    |



| <b>ISO3 code</b> | <b>Data source</b>          | <b>Year of data collection</b> | <b>Reported low birthweight rate</b> | <b>Number of weighed livebirths</b> | <b>National representativeness</b> |
|------------------|-----------------------------|--------------------------------|--------------------------------------|-------------------------------------|------------------------------------|
| BEL              | National Statistical Office | 2011                           | 6.8                                  | 127660                              | Higher coverage                    |
| BEL              | National Statistical Office | 2012                           | 6.9                                  | 127000                              | Higher coverage                    |
| BEL              | National Statistical Office | 2013                           | 7.1                                  | 124870                              | Higher coverage                    |
| BEL              | National Statistical Office | 2014                           | 7.0                                  | 124420                              | Higher coverage                    |
| BFA              | National Statistical Office | 2011                           | 9.7                                  | 561950                              | Moderate coverage                  |
| BFA              | National Statistical Office | 2012                           | 9.9                                  | 610710                              | Moderate coverage                  |
| BFA              | National Statistical Office | 2013                           | 10.3                                 | 593040                              | Moderate coverage                  |
| BFA              | National Statistical Office | 2014                           | 9.9                                  | 662340                              | Higher coverage                    |
| BFA              | National Statistical Office | 2015                           | 9.9                                  | 675070                              | Higher coverage                    |
| BGR              | National Statistical Office | 2000                           | 8.5                                  | 73680                               | Higher coverage                    |
| BGR              | National Statistical Office | 2001                           | 8.6                                  | 68180                               | Higher coverage                    |
| BGR              | National Statistical Office | 2002                           | 8.7                                  | 66500                               | Higher coverage                    |
| BGR              | National Statistical Office | 2003                           | 8.9                                  | 67360                               | Higher coverage                    |
| BGR              | National Statistical Office | 2004                           | 8.6                                  | 69890                               | Higher coverage                    |
| BGR              | National Statistical Office | 2005                           | 8.8                                  | 71080                               | Higher coverage                    |
| BGR              | National Statistical Office | 2006                           | 9.3                                  | 73980                               | Higher coverage                    |
| BGR              | National Statistical Office | 2007                           | 8.8                                  | 75350                               | Higher coverage                    |
| BGR              | National Statistical Office | 2008                           | 8.5                                  | 77720                               | Higher coverage                    |
| BGR              | National Statistical Office | 2009                           | 9.0                                  | 80960                               | Higher coverage                    |
| BGR              | National Statistical Office | 2010                           | 9.5                                  | 75520                               | Higher coverage                    |
| BGR              | National Statistical Office | 2011                           | 9.7                                  | 70850                               | Higher coverage                    |
| BGR              | National Statistical Office | 2012                           | 9.4                                  | 69130                               | Higher coverage                    |
| BGR              | National Statistical Office | 2013                           | 9.4                                  | 66580                               | Higher coverage                    |
| BGR              | National Statistical Office | 2014                           | 9.8                                  | 67590                               | Higher coverage                    |
| BGR              | National Statistical Office | 2015                           | 9.4                                  | 65950                               | Higher coverage                    |
| BHR              | Ministry of Health          | 2000                           | 8.7                                  | 14970                               | Higher coverage                    |
| BHR              | Ministry of Health          | 2001                           | 8.3                                  | 14970                               | Higher coverage                    |
| BHR              | Ministry of Health          | 2002                           | 8.1                                  | 14970                               | Higher coverage                    |
| BHR              | Ministry of Health          | 2003                           | 10.0                                 | 14970                               | Higher coverage                    |
| BHR              | Ministry of Health          | 2004                           | 8.4                                  | 14970                               | Higher coverage                    |
| BHR              | Ministry of Health          | 2005                           | 7.9                                  | 15200                               | Moderate coverage                  |
| BHR              | Ministry of Health          | 2006                           | 8.0                                  | 15060                               | Moderate coverage                  |
| BHR              | Ministry of Health          | 2007                           | 8.7                                  | 16070                               | Moderate coverage                  |
| BHR              | Ministry of Health          | 2008                           | 8.6                                  | 17030                               | Higher coverage                    |
| BHR              | Ministry of Health          | 2009                           | 9.8                                  | 17850                               | Higher coverage                    |
| BHR              | Ministry of Health          | 2010                           | 9.7                                  | 18020                               | Higher coverage                    |
| BHR              | Ministry of Health          | 2011                           | 10.0                                 | 17450                               | Moderate coverage                  |
| BHR              | Ministry of Health          | 2012                           | 9.8                                  | 19000                               | Higher coverage                    |
| BHR              | Ministry of Health          | 2013                           | 10.7                                 | 19880                               | Higher coverage                    |
| BHR              | Ministry of Health          | 2014                           | 11.3                                 | 20760                               | Higher coverage                    |

| ISO3 code | Data source                                       | Year of data collection | Reported low birthweight rate | Number of weighed livebirths | National representativeness |
|-----------|---------------------------------------------------|-------------------------|-------------------------------|------------------------------|-----------------------------|
| BHS       | Health Information and Research Unit consultation | 2006                    | 9.9                           | 5300                         | Higher coverage             |
| BHS       | Health Information and Research Unit consultation | 2007                    | 10.8                          | 5860                         | Higher coverage             |
| BHS       | Health Information and Research Unit consultation | 2008                    | 10.9                          | 5480                         | Higher coverage             |
| BHS       | Health Information and Research Unit consultation | 2009                    | 12.3                          | 5350                         | Higher coverage             |
| BHS       | Health Information and Research Unit consultation | 2010                    | 11.6                          | 5050                         | Higher coverage             |
| BHS       | Health Information and Research Unit consultation | 2011                    | 11.5                          | 5000                         | Higher coverage             |
| BHS       | Health Information and Research Unit consultation | 2012                    | 12.7                          | 4870                         | Moderate coverage           |
| BLR       | National Statistical Office                       | 2000                    | 5.0                           | 93700                        | Higher coverage             |
| BLR       | National Statistical Office                       | 2001                    | 5.2                           | 91720                        | Higher coverage             |
| BLR       | National Statistical Office                       | 2002                    | 5.2                           | 88750                        | Higher coverage             |
| BLR       | National Statistical Office                       | 2003                    | 5.4                           | 88520                        | Higher coverage             |
| BLR       | National Statistical Office                       | 2004                    | 5.5                           | 88950                        | Higher coverage             |
| BLR       | National Statistical Office                       | 2005                    | 5.4                           | 90510                        | Higher coverage             |
| BLR       | National Statistical Office                       | 2006                    | 5.2                           | 96730                        | Higher coverage             |
| BLR       | National Statistical Office                       | 2007                    | 5.1                           | 103630                       | Higher coverage             |
| BLR       | National Statistical Office                       | 2008                    | 4.9                           | 107880                       | Higher coverage             |
| BLR       | National Statistical Office                       | 2009                    | 5.0                           | 109270                       | Higher coverage             |
| BLR       | National Statistical Office                       | 2010                    | 5.0                           | 108050                       | Higher coverage             |
| BLR       | National Statistical Office                       | 2011                    | 5.1                           | 109150                       | Higher coverage             |
| BLR       | National Statistical Office                       | 2012                    | 5.1                           | 115900                       | Higher coverage             |
| BLR       | National Statistical Office                       | 2013                    | 5.0                           | 118000                       | Higher coverage             |
| BLR       | National Statistical Office                       | 2014                    | 4.8                           | 118540                       | Higher coverage             |
| BRA       | Ministry of Health                                | 2000                    | 7.7                           | 3206770                      | Higher coverage             |
| BRA       | Ministry of Health                                | 2001                    | 8.0                           | 3115480                      | Moderate coverage           |
| BRA       | Ministry of Health                                | 2002                    | 8.1                           | 3059410                      | Moderate coverage           |
| BRA       | Ministry of Health                                | 2003                    | 8.3                           | 3038260                      | Higher coverage             |
| BRA       | Ministry of Health                                | 2004                    | 8.2                           | 3026550                      | Higher coverage             |
| BRA       | Ministry of Health                                | 2005                    | 8.1                           | 3035100                      | Higher coverage             |
| BRA       | Ministry of Health                                | 2006                    | 8.2                           | 2944930                      | Higher coverage             |
| BRA       | Ministry of Health                                | 2007                    | 8.2                           | 2891330                      | Higher coverage             |
| BRA       | Ministry of Health                                | 2008                    | 8.3                           | 2934830                      | Higher coverage             |
| BRA       | Ministry of Health                                | 2009                    | 8.4                           | 2881590                      | Higher coverage             |
| BRA       | Ministry of Health                                | 2010                    | 8.4                           | 2861870                      | Higher coverage             |
| BRA       | Ministry of Health                                | 2011                    | 8.5                           | 2913160                      | Higher coverage             |
| BRA       | Ministry of Health                                | 2012                    | 8.5                           | 2905790                      | Higher coverage             |
| BRA       | Ministry of Health                                | 2013                    | 8.5                           | 2904030                      | Higher coverage             |

| <b>ISO3 code</b> | <b>Data source</b>                                   | <b>Year of data collection</b> | <b>Reported low birthweight rate</b> | <b>Number of weighed livebirths</b> | <b>National representativeness</b> |
|------------------|------------------------------------------------------|--------------------------------|--------------------------------------|-------------------------------------|------------------------------------|
| BRA              | Ministry of Health                                   | 2014                           | 8.4                                  | 2979260                             | Higher coverage                    |
| BRA              | Sistema de Informações sobre Nascidos Vivos - SINASC | 2015                           | 8.3                                  | 3017670                             | Higher coverage                    |
| BRN              | Health Information Booklet 2004                      | 2000                           | 10.0                                 | 6420                                | Moderate coverage                  |
| BRN              | Health Information Booklet 2004                      | 2001                           | 10.4                                 | 6420                                | Higher coverage                    |
| BRN              | Health Information Booklet 2004                      | 2002                           | 9.2                                  | 6420                                | Higher coverage                    |
| BRN              | Health Information Booklet 2004                      | 2003                           | 7.0                                  | 6420                                | Higher coverage                    |
| BRN              | Health Information Booklet 2008                      | 2005                           | 9.4                                  | 6420                                | Higher coverage                    |
| BRN              | Health Information Booklet 2008                      | 2006                           | 11.0                                 | 6420                                | Higher coverage                    |
| BRN              | Health Information Booklet 2008                      | 2007                           | 11.5                                 | 6420                                | Higher coverage                    |
| BRN              | Health Information Booklet 2008                      | 2008                           | 11.1                                 | 6420                                | Higher coverage                    |
| BRN              | Health Information Booklet 2009                      | 2009                           | 11.2                                 | 6420                                | Higher coverage                    |
| BRN              | Health Information Booklet 2014                      | 2010                           | 10.8                                 | 6420                                | Higher coverage                    |
| BRN              | Health Information Booklet 2014                      | 2011                           | 11.9                                 | 6730                                | Higher coverage                    |
| BRN              | Health Information Booklet 2014                      | 2012                           | 12.1                                 | 6910                                | Higher coverage                    |
| BRN              | Health Information Booklet 2014                      | 2013                           | 11.9                                 | 6680                                | Higher coverage                    |
| BRN              | Health Information Booklet 2014                      | 2014                           | 11.9                                 | 6700                                | Higher coverage                    |
| BWA              | National Statistical Office                          | 2000                           | 15.0                                 | 40640                               | Moderate coverage                  |
| BWA              | National Statistical Office                          | 2001                           | 15.2                                 | 41080                               | Moderate coverage                  |
| BWA              | National Statistical Office                          | 2002                           | 15.4                                 | 41860                               | Moderate coverage                  |
| BWA              | National Statistical Office                          | 2003                           | 15.7                                 | 41210                               | Moderate coverage                  |
| BWA              | National Statistical Office                          | 2004                           | 10.0                                 | 42180                               | Moderate coverage                  |
| BWA              | National Statistical Office                          | 2005                           | 14.4                                 | 46080                               | Higher coverage                    |
| BWA              | National Statistical Office                          | 2006                           | 12.4                                 | 44330                               | Higher coverage                    |
| BWA              | National Statistical Office                          | 2007                           | 13.3                                 | 41140                               | Moderate coverage                  |
| BWA              | National Statistical Office                          | 2008                           | 13.8                                 | 40880                               | Moderate coverage                  |
| BWA              | National Statistical Office                          | 2009                           | 14.3                                 | 48710                               | Higher coverage                    |
| BWA              | National Statistical Office                          | 2010                           | 12.5                                 | 48540                               | Higher coverage                    |
| CAN              | National Statistical Office                          | 2000                           | 5.6                                  | 327890                              | Higher coverage                    |
| CAN              | National Statistical Office                          | 2001                           | 5.5                                  | 333750                              | Higher coverage                    |
| CAN              | National Statistical Office                          | 2002                           | 5.7                                  | 328810                              | Higher coverage                    |

| <b>ISO3 code</b> | <b>Data source</b>          | <b>Year of data collection</b> | <b>Reported low birthweight rate</b> | <b>Number of weighed livebirths</b> | <b>National representativeness</b> |
|------------------|-----------------------------|--------------------------------|--------------------------------------|-------------------------------------|------------------------------------|
| CAN              | National Statistical Office | 2003                           | 5.9                                  | 335210                              | Higher coverage                    |
| CAN              | National Statistical Office | 2004                           | 5.9                                  | 337080                              | Higher coverage                    |
| CAN              | National Statistical Office | 2005                           | 6.0                                  | 342180                              | Higher coverage                    |
| CAN              | National Statistical Office | 2006                           | 6.1                                  | 354620                              | Higher coverage                    |
| CAN              | National Statistical Office | 2007                           | 6.0                                  | 367870                              | Higher coverage                    |
| CAN              | National Statistical Office | 2008                           | 6.0                                  | 377890                              | Higher coverage                    |
| CAN              | National Statistical Office | 2009                           | 6.1                                  | 380870                              | Higher coverage                    |
| CAN              | National Statistical Office | 2010                           | 6.2                                  | 377220                              | Higher coverage                    |
| CAN              | National Statistical Office | 2011                           | 6.1                                  | 377640                              | Higher coverage                    |
| CAN              | National Statistical Office | 2012                           | 6.1                                  | 381870                              | Higher coverage                    |
| CAN              | National Statistical Office | 2013                           | 6.3                                  | 380330                              | Higher coverage                    |
| CHE              | National Statistical Office | 2000                           | 5.9                                  | 78460                               | Higher coverage                    |
| CHE              | National Statistical Office | 2001                           | 6.2                                  | 72300                               | Higher coverage                    |
| CHE              | National Statistical Office | 2002                           | 6.2                                  | 72380                               | Higher coverage                    |
| CHE              | National Statistical Office | 2003                           | 6.2                                  | 71850                               | Higher coverage                    |
| CHE              | National Statistical Office | 2004                           | 6.3                                  | 73090                               | Higher coverage                    |
| CHE              | National Statistical Office | 2005                           | 6.2                                  | 72910                               | Higher coverage                    |
| CHE              | National Statistical Office | 2006                           | 6.4                                  | 73380                               | Higher coverage                    |
| CHE              | National Statistical Office | 2007                           | 6.4                                  | 74500                               | Higher coverage                    |
| CHE              | National Statistical Office | 2008                           | 6.4                                  | 76700                               | Higher coverage                    |
| CHE              | National Statistical Office | 2009                           | 6.6                                  | 78290                               | Higher coverage                    |
| CHE              | National Statistical Office | 2010                           | 6.6                                  | 80290                               | Higher coverage                    |
| CHE              | National Statistical Office | 2011                           | 6.4                                  | 80810                               | Higher coverage                    |
| CHE              | National Statistical Office | 2012                           | 6.7                                  | 82170                               | Higher coverage                    |
| CHE              | National Statistical Office | 2013                           | 6.6                                  | 82740                               | Higher coverage                    |
| CHE              | National Statistical Office | 2014                           | 6.4                                  | 85290                               | Higher coverage                    |
| CHE              | National Statistical Office | 2015                           | 6.5                                  | 86560                               | Higher coverage                    |
| CHL              | National Statistical Office | 2000                           | 5.3                                  | 248900                              | Higher coverage                    |
| CHL              | National Statistical Office | 2001                           | 5.3                                  | 246120                              | Higher coverage                    |
| CHL              | National Statistical Office | 2002                           | 5.4                                  | 238990                              | Higher coverage                    |
| CHL              | National Statistical Office | 2003                           | 5.6                                  | 234490                              | Higher coverage                    |
| CHL              | Consultation                | 2004                           | 5.6                                  | 230360                              | Higher coverage                    |
| CHL              | National Statistical Office | 2005                           | 5.5                                  | 230840                              | Higher coverage                    |
| CHL              | National Statistical Office | 2006                           | 5.8                                  | 231390                              | Higher coverage                    |
| CHL              | National Statistical Office | 2007                           | 5.8                                  | 240570                              | Higher coverage                    |
| CHL              | National Statistical Office | 2008                           | 5.9                                  | 246590                              | Higher coverage                    |
| CHL              | National Statistical Office | 2009                           | 5.9                                  | 252240                              | Higher coverage                    |
| CHL              | National Statistical Office | 2010                           | 5.9                                  | 250650                              | Higher coverage                    |
| CHL              | National Statistical Office | 2011                           | 6.0                                  | 247360                              | Higher coverage                    |
| CHL              | National Statistical Office | 2012                           | 6.0                                  | 243640                              | Higher coverage                    |
| CHL              | National Statistical Office | 2013                           | 6.2                                  | 242010                              | Higher coverage                    |

| <b>ISO3 code</b> | <b>Data source</b>          | <b>Year of data collection</b> | <b>Reported low birthweight rate</b> | <b>Number of weighed livebirths</b> | <b>National representativeness</b> |
|------------------|-----------------------------|--------------------------------|--------------------------------------|-------------------------------------|------------------------------------|
| CHL              | National Statistical Office | 2014                           | 6.2                                  | 251000                              | Higher coverage                    |
| COK              | Consultation                | 2003                           | 2.4                                  | 300                                 | Moderate coverage                  |
| COK              | Consultation                | 2004                           | 3.2                                  | 320                                 | Moderate coverage                  |
| COK              | Consultation                | 2005                           | 2.4                                  | 300                                 | Moderate coverage                  |
| COK              | Consultation                | 2007                           | 4.4                                  | 320                                 | Moderate coverage                  |
| COL              | National Statistical Office | 2000                           | 7.7                                  | 752840                              | Moderate coverage                  |
| COL              | National Statistical Office | 2001                           | 7.8                                  | 724320                              | Moderate coverage                  |
| COL              | National Statistical Office | 2002                           | 7.9                                  | 700460                              | Moderate coverage                  |
| COL              | National Statistical Office | 2003                           | 8.0                                  | 710710                              | Moderate coverage                  |
| COL              | National Statistical Office | 2004                           | 8.1                                  | 723100                              | Moderate coverage                  |
| COL              | National Statistical Office | 2005                           | 8.3                                  | 719970                              | Moderate coverage                  |
| COL              | National Statistical Office | 2006                           | 8.6                                  | 714450                              | Moderate coverage                  |
| COL              | National Statistical Office | 2007                           | 8.7                                  | 709260                              | Moderate coverage                  |
| COL              | National Statistical Office | 2008                           | 8.9                                  | 715460                              | Moderate coverage                  |
| COL              | National Statistical Office | 2009                           | 9.1                                  | 699780                              | Moderate coverage                  |
| COL              | National Statistical Office | 2010                           | 9.1                                  | 654630                              | Moderate coverage                  |
| COL              | National Statistical Office | 2011                           | 9.1                                  | 665500                              | Moderate coverage                  |
| COL              | National Statistical Office | 2012                           | 9.0                                  | 676840                              | Moderate coverage                  |
| COL              | National Statistical Office | 2013                           | 9.0                                  | 658840                              | Moderate coverage                  |
| COL              | National Statistical Office | 2014                           | 9.0                                  | 669140                              | Moderate coverage                  |
| COL              | National Statistical Office | 2015                           | 8.8                                  | 659260                              | Moderate coverage                  |
| CRI              | National Statistical Office | 2001                           | 6.9                                  | 71150                               | Higher coverage                    |
| CRI              | National Statistical Office | 2003                           | 6.9                                  | 72940                               | Higher coverage                    |
| CRI              | National Statistical Office | 2004                           | 6.7                                  | 72250                               | Higher coverage                    |
| CRI              | National Statistical Office | 2005                           | 6.8                                  | 71550                               | Higher coverage                    |
| CRI              | National Statistical Office | 2006                           | 7.0                                  | 71300                               | Higher coverage                    |
| CRI              | National Statistical Office | 2007                           | 7.0                                  | 73150                               | Higher coverage                    |
| CRI              | National Statistical Office | 2008                           | 7.0                                  | 75190                               | Higher coverage                    |
| CRI              | National Statistical Office | 2009                           | 6.9                                  | 75000                               | Higher coverage                    |
| CRI              | National Statistical Office | 2010                           | 7.1                                  | 70930                               | Higher coverage                    |
| CRI              | National Statistical Office | 2011                           | 7.2                                  | 73460                               | Higher coverage                    |
| CRI              | National Statistical Office | 2012                           | 7.3                                  | 73330                               | Higher coverage                    |
| CRI              | National Statistical Office | 2013                           | 7.4                                  | 70550                               | Higher coverage                    |
| CRI              | National Statistical Office | 2014                           | 7.4                                  | 71800                               | Higher coverage                    |
| CRI              | National Statistical Office | 2015                           | 7.5                                  | 71820                               | Higher coverage                    |
| CUB              | National Statistical Office | 2000                           | 6.1                                  | 143530                              | Higher coverage                    |
| CUB              | National Statistical Office | 2001                           | 5.9                                  | 138720                              | Higher coverage                    |
| CUB              | National Statistical Office | 2002                           | 5.9                                  | 141280                              | Higher coverage                    |
| CUB              | National Statistical Office | 2003                           | 5.5                                  | 136800                              | Higher coverage                    |
| CUB              | National Statistical Office | 2004                           | 5.5                                  | 127200                              | Higher coverage                    |
| CUB              | National Statistical Office | 2005                           | 5.4                                  | 120720                              | Higher coverage                    |

| <b>ISO3 code</b> | <b>Data source</b>          | <b>Year of data collection</b> | <b>Reported low birthweight rate</b> | <b>Number of weighed livebirths</b> | <b>National representativeness</b> |
|------------------|-----------------------------|--------------------------------|--------------------------------------|-------------------------------------|------------------------------------|
| CUB              | National Statistical Office | 2006                           | 5.4                                  | 111330                              | Moderate coverage                  |
| CUB              | National Statistical Office | 2007                           | 5.2                                  | 112480                              | Moderate coverage                  |
| CUB              | National Statistical Office | 2008                           | 5.1                                  | 122570                              | Higher coverage                    |
| CUB              | National Statistical Office | 2009                           | 5.1                                  | 130040                              | Higher coverage                    |
| CUB              | National Statistical Office | 2010                           | 5.4                                  | 127750                              | Higher coverage                    |
| CUB              | National Statistical Office | 2011                           | 5.3                                  | 133070                              | Higher coverage                    |
| CUB              | National Statistical Office | 2012                           | 5.2                                  | 125680                              | Higher coverage                    |
| CUB              | National Statistical Office | 2013                           | 5.1                                  | 125880                              | Higher coverage                    |
| CUB              | National Statistical Office | 2014                           | 5.3                                  | 122650                              | Higher coverage                    |
| CUB              | National Statistical Office | 2015                           | 5.3                                  | 125070                              | Higher coverage                    |
| CZE              | National Statistical Office | 2000                           | 5.8                                  | 90910                               | Higher coverage                    |
| CZE              | National Statistical Office | 2001                           | 6.0                                  | 90720                               | Higher coverage                    |
| CZE              | National Statistical Office | 2002                           | 6.2                                  | 92790                               | Higher coverage                    |
| CZE              | National Statistical Office | 2003                           | 6.6                                  | 93690                               | Higher coverage                    |
| CZE              | National Statistical Office | 2004                           | 6.8                                  | 97670                               | Higher coverage                    |
| CZE              | National Statistical Office | 2005                           | 6.7                                  | 102220                              | Higher coverage                    |
| CZE              | National Statistical Office | 2006                           | 7.1                                  | 105840                              | Higher coverage                    |
| CZE              | National Statistical Office | 2007                           | 7.4                                  | 114640                              | Higher coverage                    |
| CZE              | National Statistical Office | 2008                           | 7.2                                  | 119570                              | Higher coverage                    |
| CZE              | National Statistical Office | 2009                           | 7.6                                  | 118350                              | Higher coverage                    |
| CZE              | National Statistical Office | 2010                           | 7.7                                  | 117160                              | Higher coverage                    |
| CZE              | National Statistical Office | 2011                           | 7.6                                  | 108680                              | Higher coverage                    |
| CZE              | National Statistical Office | 2012                           | 8.0                                  | 108580                              | Higher coverage                    |
| CZE              | National Statistical Office | 2013                           | 8.1                                  | 106760                              | Higher coverage                    |
| CZE              | National Statistical Office | 2014                           | 7.8                                  | 109860                              | Higher coverage                    |
| CZE              | National Statistical Office | 2015                           | 7.8                                  | 110770                              | Higher coverage                    |
| DEU              | National Statistical Office | 2000                           | 6.4                                  | 767000                              | Higher coverage                    |
| DEU              | National Statistical Office | 2001                           | 6.6                                  | 734480                              | Higher coverage                    |
| DEU              | National Statistical Office | 2002                           | 6.7                                  | 719250                              | Higher coverage                    |
| DEU              | National Statistical Office | 2003                           | 6.8                                  | 706730                              | Higher coverage                    |
| DEU              | National Statistical Office | 2004                           | 7.0                                  | 705630                              | Higher coverage                    |
| DEU              | National Statistical Office | 2005                           | 6.8                                  | 685800                              | Higher coverage                    |
| DEU              | National Statistical Office | 2006                           | 6.8                                  | 672730                              | Higher coverage                    |
| DEU              | National Statistical Office | 2007                           | 6.9                                  | 684870                              | Higher coverage                    |
| DEU              | National Statistical Office | 2008                           | 6.8                                  | 682520                              | Higher coverage                    |
| DEU              | National Statistical Office | 2009                           | 6.9                                  | 665130                              | Higher coverage                    |
| DEU              | National Statistical Office | 2010                           | 6.9                                  | 677950                              | Higher coverage                    |
| DEU              | National Statistical Office | 2011                           | 6.9                                  | 662690                              | Higher coverage                    |
| DEU              | National Statistical Office | 2012                           | 6.9                                  | 673550                              | Higher coverage                    |
| DEU              | National Statistical Office | 2013                           | 6.6                                  | 682070                              | Higher coverage                    |
| DNK              | National Statistical Office | 2000                           | 5.0                                  | 67060                               | Higher coverage                    |

| ISO3 code | Data source                 | Year of data collection | Reported low birthweight rate | Number of weighed livebirths | National representativeness |
|-----------|-----------------------------|-------------------------|-------------------------------|------------------------------|-----------------------------|
| DNK       | National Statistical Office | 2001                    | 5.4                           | 65310                        | Higher coverage             |
| DNK       | National Statistical Office | 2002                    | 5.4                           | 64480                        | Higher coverage             |
| DNK       | National Statistical Office | 2003                    | 5.4                           | 64550                        | Higher coverage             |
| DNK       | National Statistical Office | 2004                    | 5.3                           | 64590                        | Higher coverage             |
| DNK       | National Statistical Office | 2005                    | 5.2                           | 64250                        | Higher coverage             |
| DNK       | National Statistical Office | 2006                    | 5.1                           | 64940                        | Higher coverage             |
| DNK       | National Statistical Office | 2007                    | 5.3                           | 64090                        | Higher coverage             |
| DNK       | National Statistical Office | 2008                    | 5.4                           | 65040                        | Higher coverage             |
| DNK       | National Statistical Office | 2009                    | 5.3                           | 62820                        | Higher coverage             |
| DNK       | National Statistical Office | 2010                    | 5.2                           | 63410                        | Higher coverage             |
| DNK       | National Statistical Office | 2011                    | 5.5                           | 59000                        | Higher coverage             |
| DNK       | National Statistical Office | 2012                    | 5.3                           | 57920                        | Higher coverage             |
| DNK       | National Statistical Office | 2013                    | 5.2                           | 55880                        | Higher coverage             |
| DNK       | National Statistical Office | 2014                    | 5.3                           | 56870                        | Higher coverage             |
| ECU       | National Statistical Office | 2009                    | 9.6                           | 332600                       | Higher coverage             |
| ECU       | National Statistical Office | 2010                    | 9.5                           | 320630                       | Higher coverage             |
| ECU       | National Statistical Office | 2011                    | 9.5                           | 328220                       | Higher coverage             |
| ECU       | National Statistical Office | 2012                    | 9.6                           | 317350                       | Higher coverage             |
| ECU       | National Statistical Office | 2013                    | 9.7                           | 292020                       | Moderate coverage           |
| ECU       | National Statistical Office | 2014                    | 9.5                           | 285960                       | Moderate coverage           |
| ECU       | National Statistical Office | 2015                    | 9.8                           | 283320                       | Moderate coverage           |
| ESP       | National Statistical Office | 2000                    | 6.9                           | 397640                       | Higher coverage             |
| ESP       | National Statistical Office | 2001                    | 7.2                           | 406380                       | Higher coverage             |
| ESP       | National Statistical Office | 2002                    | 7.5                           | 418850                       | Higher coverage             |
| ESP       | National Statistical Office | 2003                    | 7.5                           | 441890                       | Higher coverage             |
| ESP       | National Statistical Office | 2004                    | 7.4                           | 454600                       | Higher coverage             |
| ESP       | National Statistical Office | 2005                    | 7.6                           | 466380                       | Higher coverage             |
| ESP       | National Statistical Office | 2006                    | 7.5                           | 482960                       | Higher coverage             |
| ESP       | National Statistical Office | 2007                    | 8.0                           | 492530                       | Higher coverage             |
| ESP       | National Statistical Office | 2008                    | 8.0                           | 519780                       | Higher coverage             |
| ESP       | National Statistical Office | 2009                    | 8.2                           | 495000                       | Higher coverage             |
| ESP       | National Statistical Office | 2010                    | 8.1                           | 486580                       | Higher coverage             |
| ESP       | National Statistical Office | 2011                    | 8.1                           | 472000                       | Higher coverage             |
| ESP       | National Statistical Office | 2012                    | 8.2                           | 454650                       | Higher coverage             |
| ESP       | National Statistical Office | 2013                    | 8.1                           | 425720                       | Higher coverage             |
| ESP       | National Statistical Office | 2014                    | 8.2                           | 427600                       | Higher coverage             |
| ESP       | National Statistical Office | 2015                    | 8.3                           | 420290                       | Higher coverage             |
| EST       | National Statistical Office | 2000                    | 4.3                           | 13060                        | Higher coverage             |
| EST       | National Statistical Office | 2001                    | 4.3                           | 12630                        | Higher coverage             |
| EST       | National Statistical Office | 2002                    | 4.6                           | 12990                        | Higher coverage             |
| EST       | National Statistical Office | 2003                    | 4.4                           | 13020                        | Higher coverage             |

| ISO3 code | Data source                 | Year of data collection | Reported low birthweight rate | Number of weighed livebirths | National representativeness |
|-----------|-----------------------------|-------------------------|-------------------------------|------------------------------|-----------------------------|
| EST       | National Statistical Office | 2004                    | 4.3                           | 13980                        | Higher coverage             |
| EST       | National Statistical Office | 2005                    | 4.6                           | 14340                        | Higher coverage             |
| EST       | National Statistical Office | 2006                    | 4.4                           | 14870                        | Higher coverage             |
| EST       | National Statistical Office | 2007                    | 4.5                           | 15800                        | Higher coverage             |
| EST       | National Statistical Office | 2008                    | 4.6                           | 16050                        | Higher coverage             |
| EST       | National Statistical Office | 2009                    | 4.5                           | 15800                        | Higher coverage             |
| EST       | National Statistical Office | 2010                    | 4.0                           | 15930                        | Higher coverage             |
| EST       | National Statistical Office | 2011                    | 4.4                           | 14890                        | Higher coverage             |
| EST       | National Statistical Office | 2012                    | 4.6                           | 14370                        | Higher coverage             |
| EST       | National Statistical Office | 2013                    | 4.3                           | 13940                        | Higher coverage             |
| EST       | National Statistical Office | 2014                    | 4.6                           | 13790                        | Higher coverage             |
| EST       | National Statistical Office | 2015                    | 4.2                           | 14060                        | Higher coverage             |
| FIN       | National Statistical Office | 2000                    | 4.3                           | 56540                        | Higher coverage             |
| FIN       | National Statistical Office | 2001                    | 4.3                           | 55790                        | Higher coverage             |
| FIN       | National Statistical Office | 2002                    | 4.3                           | 55340                        | Higher coverage             |
| FIN       | National Statistical Office | 2003                    | 4.1                           | 56450                        | Higher coverage             |
| FIN       | National Statistical Office | 2004                    | 4.2                           | 57570                        | Higher coverage             |
| FIN       | National Statistical Office | 2005                    | 4.1                           | 57640                        | Higher coverage             |
| FIN       | National Statistical Office | 2006                    | 4.3                           | 58860                        | Higher coverage             |
| FIN       | National Statistical Office | 2007                    | 4.3                           | 58730                        | Higher coverage             |
| FIN       | National Statistical Office | 2008                    | 4.1                           | 59610                        | Higher coverage             |
| FIN       | National Statistical Office | 2009                    | 4.3                           | 60590                        | Higher coverage             |
| FIN       | National Statistical Office | 2010                    | 4.3                           | 61200                        | Higher coverage             |
| FIN       | National Statistical Office | 2011                    | 4.1                           | 60100                        | Higher coverage             |
| FIN       | National Statistical Office | 2012                    | 4.1                           | 59700                        | Higher coverage             |
| FIN       | National Statistical Office | 2013                    | 4.1                           | 58380                        | Higher coverage             |
| FIN       | National Statistical Office | 2014                    | 4.2                           | 57640                        | Higher coverage             |
| FIN       | National Statistical Office | 2015                    | 4.2                           | 55590                        | Higher coverage             |
| FRA       | PMSI                        | 2012                    | 7.4                           | 776070                       | Higher coverage             |
| FRA       | PMSI                        | 2013                    | 7.4                           | 766050                       | Higher coverage             |
| FRA       | PMSI                        | 2014                    | 7.5                           | 769120                       | Higher coverage             |
| FRA       | PMSI                        | 2015                    | 7.6                           | 772520                       | Higher coverage             |
| GBR       | National Statistical Office | 2000                    | 7.3                           | NA                           | Higher coverage             |
| GBR       | National Statistical Office | 2001                    | 7.3                           | NA                           | Higher coverage             |
| GBR       | National Statistical Office | 2002                    | 7.4                           | NA                           | Higher coverage             |
| GBR       | National Statistical Office | 2003                    | 7.4                           | NA                           | Higher coverage             |
| GBR       | National Statistical Office | 2004                    | 7.3                           | NA                           | Higher coverage             |
| GBR       | National Statistical Office | 2005                    | 7.4                           | NA                           | Higher coverage             |
| GBR       | National Statistical Office | 2006                    | 7.5                           | NA                           | Higher coverage             |
| GBR       | National Statistical Office | 2007                    | 7.1                           | NA                           | Higher coverage             |
| GBR       | National Statistical Office | 2008                    | 7.1                           | NA                           | Higher coverage             |



| <b>ISO3 code</b> | <b>Data source</b>          | <b>Year of data collection</b> | <b>Reported low birthweight rate</b> | <b>Number of weighed livebirths</b> | <b>National representativeness</b> |
|------------------|-----------------------------|--------------------------------|--------------------------------------|-------------------------------------|------------------------------------|
| GBR              | National Statistical Office | 2009                           | 7.1                                  | NA                                  | Higher coverage                    |
| GBR              | National Statistical Office | 2010                           | 7.0                                  | NA                                  | Higher coverage                    |
| GBR              | National Statistical Office | 2011                           | 7.0                                  | NA                                  | Higher coverage                    |
| GBR              | National Statistical Office | 2012                           | 7.0                                  | NA                                  | Higher coverage                    |
| GBR              | National Statistical Office | 2013                           | 7.0                                  | NA                                  | Higher coverage                    |
| GBR              | National Statistical Office | 2014                           | 6.9                                  | NA                                  | Higher coverage                    |
| GBR              | National Statistical Office | 2015                           | 6.9                                  | NA                                  | Higher coverage                    |
| GEO              | National Statistical Office | 2000                           | 5.9                                  | 48800                               | Moderate coverage                  |
| GEO              | National Statistical Office | 2001                           | 6.4                                  | 47590                               | Moderate coverage                  |
| GEO              | National Statistical Office | 2002                           | 6.3                                  | 46610                               | Moderate coverage                  |
| GEO              | National Statistical Office | 2003                           | 6.8                                  | 46200                               | Moderate coverage                  |
| GEO              | National Statistical Office | 2004                           | 5.5                                  | 49580                               | Moderate coverage                  |
| GEO              | National Statistical Office | 2005                           | 6.0                                  | 46520                               | Moderate coverage                  |
| GEO              | National Statistical Office | 2006                           | 5.3                                  | 47800                               | Moderate coverage                  |
| GEO              | National Statistical Office | 2007                           | 5.3                                  | 49290                               | Moderate coverage                  |
| GEO              | National Statistical Office | 2008                           | 4.7                                  | 56570                               | Higher coverage                    |
| GEO              | National Statistical Office | 2009                           | 5.2                                  | 63380                               | Higher coverage                    |
| GEO              | National Statistical Office | 2010                           | 4.7                                  | 62590                               | Higher coverage                    |
| GEO              | National Statistical Office | 2011                           | 4.0                                  | 58020                               | Higher coverage                    |
| GEO              | National Statistical Office | 2012                           | 5.4                                  | 57040                               | Higher coverage                    |
| GEO              | National Statistical Office | 2013                           | 5.4                                  | 57880                               | Higher coverage                    |
| GEO              | National Statistical Office | 2014                           | 5.6                                  | 60640                               | Higher coverage                    |
| GEO              | National Statistical Office | 2015                           | 5.8                                  | 59250                               | Higher coverage                    |
| GRC              | National Statistical Office | 2000                           | 8.1                                  | 103280                              | Higher coverage                    |
| GRC              | National Statistical Office | 2001                           | 8.4                                  | 102290                              | Higher coverage                    |
| GRC              | National Statistical Office | 2002                           | 8.3                                  | 103570                              | Higher coverage                    |
| GRC              | National Statistical Office | 2003                           | 7.8                                  | 104420                              | Higher coverage                    |
| GRC              | National Statistical Office | 2004                           | 8.6                                  | 105660                              | Higher coverage                    |
| GRC              | National Statistical Office | 2005                           | 8.0                                  | 107550                              | Higher coverage                    |
| GRC              | National Statistical Office | 2006                           | 8.3                                  | 112050                              | Higher coverage                    |
| GRC              | National Statistical Office | 2007                           | 8.8                                  | 111930                              | Higher coverage                    |
| GRC              | National Statistical Office | 2008                           | 8.4                                  | 118310                              | Higher coverage                    |
| GRC              | National Statistical Office | 2009                           | 9.6                                  | 117940                              | Higher coverage                    |
| GRC              | National Statistical Office | 2010                           | 10.0                                 | 114770                              | Higher coverage                    |
| GRC              | National Statistical Office | 2011                           | 9.8                                  | 106430                              | Higher coverage                    |
| GRC              | National Statistical Office | 2012                           | 9.8                                  | 100380                              | Higher coverage                    |
| GRC              | National Statistical Office | 2013                           | 9.4                                  | 94140                               | Higher coverage                    |
| GRC              | National Statistical Office | 2014                           | 9.4                                  | 92150                               | Higher coverage                    |
| GRC              | National Statistical Office | 2015                           | 9.3                                  | 91850                               | Higher coverage                    |
| GTM              | National Statistical Office | 2009                           | 8.4                                  | 351630                              | Moderate coverage                  |
| GTM              | National Statistical Office | 2010                           | 8.2                                  | 361910                              | Moderate coverage                  |

| <b>ISO3 code</b> | <b>Data source</b>                  | <b>Year of data collection</b> | <b>Reported low birthweight rate</b> | <b>Number of weighed livebirths</b> | <b>National representativeness</b> |
|------------------|-------------------------------------|--------------------------------|--------------------------------------|-------------------------------------|------------------------------------|
| GTM              | National Statistical Office         | 2011                           | 8.9                                  | 373700                              | Higher coverage                    |
| GTM              | National Statistical Office         | 2012                           | 9.3                                  | 388620                              | Higher coverage                    |
| GTM              | National Statistical Office         | 2013                           | 9.5                                  | 387350                              | Higher coverage                    |
| GTM              | National Statistical Office         | 2014                           | 10.1                                 | 386200                              | Higher coverage                    |
| GTM              | National Statistical Office         | 2015                           | 10.4                                 | 391430                              | Higher coverage                    |
| HRV              | Croatian Institute of Public Health | 2000                           | 5.1                                  | 44190                               | Higher coverage                    |
| HRV              | Croatian Institute of Public Health | 2001                           | 5.6                                  | 41260                               | Higher coverage                    |
| HRV              | Croatian Institute of Public Health | 2002                           | 5.7                                  | 40280                               | Higher coverage                    |
| HRV              | Croatian Institute of Public Health | 2003                           | 5.4                                  | 39790                               | Higher coverage                    |
| HRV              | Croatian Institute of Public Health | 2004                           | 5.0                                  | 40530                               | Higher coverage                    |
| HRV              | Croatian Institute of Public Health | 2005                           | 4.8                                  | 42800                               | Higher coverage                    |
| HRV              | Croatian Institute of Public Health | 2006                           | 4.8                                  | 41750                               | Higher coverage                    |
| HRV              | Croatian Institute of Public Health | 2007                           | 5.0                                  | 42260                               | Higher coverage                    |
| HRV              | Croatian Institute of Public Health | 2008                           | 4.6                                  | 44110                               | Higher coverage                    |
| HRV              | Croatian Institute of Public Health | 2009                           | 5.3                                  | 44870                               | Higher coverage                    |
| HRV              | Croatian Institute of Public Health | 2010                           | 4.8                                  | 43630                               | Higher coverage                    |
| HRV              | Croatian Institute of Public Health | 2011                           | 5.1                                  | 41400                               | Higher coverage                    |
| HRV              | Croatian Institute of Public Health | 2012                           | 4.9                                  | 41910                               | Higher coverage                    |
| HRV              | Croatian Institute of Public Health | 2013                           | 4.7                                  | 40170                               | Higher coverage                    |
| HRV              | Croatian Institute of Public Health | 2014                           | 5.0                                  | 39770                               | Higher coverage                    |
| HRV              | Croatian Institute of Public Health | 2015                           | 5.1                                  | 37700                               | Higher coverage                    |
| HUN              | National Statistical Office         | 2000                           | 8.4                                  | 97600                               | Higher coverage                    |
| HUN              | National Statistical Office         | 2001                           | 8.5                                  | 97050                               | Higher coverage                    |
| HUN              | National Statistical Office         | 2002                           | 8.5                                  | 96810                               | Higher coverage                    |
| HUN              | National Statistical Office         | 2003                           | 8.7                                  | 94650                               | Higher coverage                    |
| HUN              | National Statistical Office         | 2004                           | 8.3                                  | 95140                               | Higher coverage                    |
| HUN              | National Statistical Office         | 2005                           | 8.2                                  | 97500                               | Higher coverage                    |
| HUN              | National Statistical Office         | 2006                           | 8.3                                  | 99880                               | Higher coverage                    |
| HUN              | National Statistical Office         | 2007                           | 8.2                                  | 97620                               | Higher coverage                    |

| <b>ISO3 code</b> | <b>Data source</b>                        | <b>Year of data collection</b> | <b>Reported low birthweight rate</b> | <b>Number of weighed livebirths</b> | <b>National representativeness</b> |
|------------------|-------------------------------------------|--------------------------------|--------------------------------------|-------------------------------------|------------------------------------|
| HUN              | National Statistical Office               | 2008                           | 8.3                                  | 99150                               | Higher coverage                    |
| HUN              | National Statistical Office               | 2009                           | 8.4                                  | 96450                               | Higher coverage                    |
| HUN              | National Statistical Office               | 2010                           | 8.6                                  | 90340                               | Higher coverage                    |
| HUN              | National Statistical Office               | 2011                           | 8.5                                  | 88050                               | Higher coverage                    |
| HUN              | National Statistical Office               | 2012                           | 8.6                                  | 90270                               | Higher coverage                    |
| HUN              | National Statistical Office               | 2013                           | 8.8                                  | 88690                               | Higher coverage                    |
| HUN              | National Statistical Office               | 2014                           | 8.9                                  | 91510                               | Higher coverage                    |
| HUN              | National Statistical Office               | 2015                           | 8.5                                  | 91690                               | Higher coverage                    |
| IRL              | National Statistical Office               | 2000                           | 4.8                                  | 54790                               | Higher coverage                    |
| IRL              | National Statistical Office               | 2001                           | 5.1                                  | 57860                               | Higher coverage                    |
| IRL              | National Statistical Office               | 2002                           | 4.9                                  | 60510                               | Higher coverage                    |
| IRL              | National Statistical Office               | 2003                           | 5.0                                  | 61530                               | Higher coverage                    |
| IRL              | National Statistical Office               | 2004                           | 4.9                                  | 61980                               | Higher coverage                    |
| IRL              | National Statistical Office               | 2005                           | 4.9                                  | 61380                               | Higher coverage                    |
| IRL              | National Statistical Office               | 2006                           | 4.8                                  | 65430                               | Higher coverage                    |
| IRL              | National Statistical Office               | 2007                           | 5.1                                  | 71390                               | Higher coverage                    |
| IRL              | National Statistical Office               | 2008                           | 5.3                                  | 75180                               | Higher coverage                    |
| IRL              | National Statistical Office               | 2009                           | 4.9                                  | 75560                               | Higher coverage                    |
| IRL              | National Statistical Office               | 2010                           | 5.0                                  | 75180                               | Higher coverage                    |
| IRL              | National Statistical Office               | 2011                           | 5.2                                  | 74040                               | Higher coverage                    |
| IRL              | National Statistical Office               | 2012                           | 5.4                                  | 71680                               | Higher coverage                    |
| IRL              | National Statistical Office               | 2013                           | 5.6                                  | 68960                               | Higher coverage                    |
| IRL              | National Statistical Office               | 2014                           | 5.6                                  | 67300                               | Higher coverage                    |
| ISL              | National Statistical Office               | 2000                           | 3.7                                  | 4320                                | Higher coverage                    |
| ISL              | National Statistical Office               | 2001                           | 3.2                                  | 4100                                | Higher coverage                    |
| ISL              | National Statistical Office               | 2002                           | 3.9                                  | 4050                                | Higher coverage                    |
| ISL              | National Statistical Office               | 2003                           | 3.0                                  | 4150                                | Higher coverage                    |
| ISL              | National Statistical Office               | 2004                           | 3.5                                  | 4240                                | Higher coverage                    |
| ISL              | National Statistical Office               | 2005                           | 3.7                                  | 4280                                | Higher coverage                    |
| ISL              | National Statistical Office               | 2006                           | 3.9                                  | 4420                                | Higher coverage                    |
| ISL              | National Statistical Office               | 2007                           | 3.9                                  | 4560                                | Higher coverage                    |
| ISL              | National Statistical Office               | 2008                           | 3.8                                  | 4840                                | Higher coverage                    |
| ISL              | National Statistical Office               | 2009                           | 4.0                                  | 5030                                | Higher coverage                    |
| ISL              | National Statistical Office               | 2010                           | 3.6                                  | 4910                                | Higher coverage                    |
| ISL              | National Statistical Office               | 2011                           | 3.2                                  | 4500                                | Higher coverage                    |
| ISL              | National Statistical Office               | 2012                           | 4.2                                  | 4540                                | Higher coverage                    |
| ISL              | National Statistical Office               | 2013                           | 3.7                                  | 4330                                | Higher coverage                    |
| ISL              | National Statistical Office               | 2014                           | 4.0                                  | 4380                                | Higher coverage                    |
| ISL              | National Statistical Office               | 2015                           | 4.4                                  | 4130                                | Higher coverage                    |
| ISR              | Public Health Service, Ministry of Health | 2000                           | 8.4                                  | 136490                              | Higher coverage                    |

| <b>ISO3 code</b> | <b>Data source</b>                        | <b>Year of data collection</b> | <b>Reported low birthweight rate</b> | <b>Number of weighed livebirths</b> | <b>National representativeness</b> |
|------------------|-------------------------------------------|--------------------------------|--------------------------------------|-------------------------------------|------------------------------------|
| ISR              | Public Health Service, Ministry of Health | 2001                           | 8.2                                  | 136710                              | Higher coverage                    |
| ISR              | Public Health Service, Ministry of Health | 2002                           | 8.3                                  | 140090                              | Higher coverage                    |
| ISR              | Public Health Service, Ministry of Health | 2003                           | 8.3                                  | 145400                              | Higher coverage                    |
| ISR              | Public Health Service, Ministry of Health | 2004                           | 8.2                                  | 144400                              | Higher coverage                    |
| ISR              | Public Health Service, Ministry of Health | 2005                           | 8.2                                  | 144010                              | Higher coverage                    |
| ISR              | Public Health Service, Ministry of Health | 2006                           | 8.2                                  | 148250                              | Higher coverage                    |
| ISR              | Public Health Service, Ministry of Health | 2007                           | 8.4                                  | 151640                              | Higher coverage                    |
| ISR              | Public Health Service, Ministry of Health | 2008                           | 8.4                                  | 156870                              | Higher coverage                    |
| ISR              | Public Health Service, Ministry of Health | 2009                           | 8.2                                  | 161010                              | Higher coverage                    |
| ISR              | Public Health Service, Ministry of Health | 2010                           | 8.1                                  | 166300                              | Higher coverage                    |
| ISR              | Public Health Service, Ministry of Health | 2011                           | 8.1                                  | 166540                              | Higher coverage                    |
| ISR              | Public Health Service, Ministry of Health | 2012                           | 8.0                                  | 171060                              | Higher coverage                    |
| ISR              | Public Health Service, Ministry of Health | 2013                           | 7.8                                  | 171430                              | Higher coverage                    |
| ISR              | Public Health Service, Ministry of Health | 2014                           | 7.8                                  | 176420                              | Higher coverage                    |
| ISR              | Public Health Service, Ministry of Health | 2015                           | 8.0                                  | 178750                              | Higher coverage                    |
| ITA              | Ministry of Health                        | 2003                           | 6.7                                  | 457310                              | Moderate coverage                  |
| ITA              | Ministry of Health                        | 2004                           | 6.7                                  | 479410                              | Moderate coverage                  |
| ITA              | Ministry of Health                        | 2005                           | 6.8                                  | 509980                              | Higher coverage                    |
| ITA              | Ministry of Health                        | 2006                           | 6.9                                  | 522830                              | Higher coverage                    |
| ITA              | Ministry of Health                        | 2007                           | 6.7                                  | 520360                              | Higher coverage                    |
| ITA              | Ministry of Health                        | 2008                           | 6.9                                  | 549150                              | Higher coverage                    |
| ITA              | Ministry of Health                        | 2009                           | 7.0                                  | 553530                              | Higher coverage                    |
| ITA              | Ministry of Health                        | 2010                           | 7.1                                  | 550980                              | Higher coverage                    |
| ITA              | Ministry of Health                        | 2011                           | 7.1                                  | 538470                              | Higher coverage                    |
| ITA              | Ministry of Health                        | 2012                           | 7.1                                  | 532480                              | Higher coverage                    |
| ITA              | Ministry of Health                        | 2013                           | 7.2                                  | 509740                              | Higher coverage                    |
| ITA              | Ministry of Health                        | 2014                           | 7.2                                  | 500280                              | Higher coverage                    |
| ITA              | Ministry of Health                        | 2015                           | 7.4                                  | 484520                              | Higher coverage                    |
| JAM              | Ministry of Health                        | 2005                           | 11.5                                 | 42290                               | Moderate coverage                  |
| JPN              | National Statistical Office               | 2000                           | 8.6                                  | 1190550                             | Higher coverage                    |

| ISO3 code | Data source                 | Year of data collection | Reported low birthweight rate | Number of weighed livebirths | National representativeness |
|-----------|-----------------------------|-------------------------|-------------------------------|------------------------------|-----------------------------|
| JPN       | National Statistical Office | 2001                    | 8.8                           | 1170670                      | Higher coverage             |
| JPN       | National Statistical Office | 2002                    | 9.0                           | 1153860                      | Higher coverage             |
| JPN       | National Statistical Office | 2003                    | 9.1                           | 1123610                      | Higher coverage             |
| JPN       | National Statistical Office | 2004                    | 9.4                           | 1110730                      | Higher coverage             |
| JPN       | National Statistical Office | 2005                    | 9.5                           | 1062530                      | Higher coverage             |
| JPN       | National Statistical Office | 2006                    | 9.6                           | 1092680                      | Higher coverage             |
| JPN       | National Statistical Office | 2007                    | 9.7                           | 1089820                      | Higher coverage             |
| JPN       | National Statistical Office | 2008                    | 9.6                           | 1091160                      | Higher coverage             |
| JPN       | National Statistical Office | 2009                    | 9.6                           | 1070040                      | Higher coverage             |
| JPN       | National Statistical Office | 2010                    | 9.6                           | 1071310                      | Higher coverage             |
| JPN       | National Statistical Office | 2011                    | 9.6                           | 1050810                      | Higher coverage             |
| JPN       | National Statistical Office | 2012                    | 9.6                           | 1037240                      | Higher coverage             |
| JPN       | National Statistical Office | 2013                    | 9.6                           | 1029820                      | Higher coverage             |
| JPN       | National Statistical Office | 2014                    | 9.5                           | 1003540                      | Higher coverage             |
| JPN       | National Statistical Office | 2015                    | 9.5                           | 1005680                      | Higher coverage             |
| KAZ       | National Statistical Office | 2000                    | 5.9                           | 222060                       | Higher coverage             |
| KAZ       | National Statistical Office | 2001                    | 5.3                           | 221490                       | Higher coverage             |
| KAZ       | National Statistical Office | 2002                    | 6.1                           | 227180                       | Higher coverage             |
| KAZ       | National Statistical Office | 2003                    | 5.5                           | 247950                       | Higher coverage             |
| KAZ       | National Statistical Office | 2004                    | 5.2                           | 273030                       | Higher coverage             |
| KAZ       | National Statistical Office | 2005                    | 4.8                           | 278980                       | Higher coverage             |
| KAZ       | National Statistical Office | 2006                    | 5.0                           | 301760                       | Higher coverage             |
| KAZ       | National Statistical Office | 2007                    | 5.2                           | 321970                       | Higher coverage             |
| KAZ       | National Statistical Office | 2008                    | 6.1                           | 357560                       | Higher coverage             |
| KAZ       | National Statistical Office | 2009                    | 6.1                           | 356380                       | Higher coverage             |
| KAZ       | National Statistical Office | 2010                    | 6.1                           | 367950                       | Higher coverage             |
| KAZ       | National Statistical Office | 2011                    | 6.1                           | 372810                       | Higher coverage             |
| KAZ       | National Statistical Office | 2012                    | 6.1                           | 381010                       | Higher coverage             |
| KAZ       | National Statistical Office | 2013                    | 5.9                           | 387230                       | Higher coverage             |
| KAZ       | National Statistical Office | 2014                    | 5.8                           | 399960                       | Higher coverage             |
| KGZ       | Ministry of Health          | 2004                    | 6.2                           | 103110                       | Higher coverage             |
| KGZ       | Ministry of Health          | 2005                    | 6.2                           | 109100                       | Higher coverage             |
| KGZ       | Ministry of Health          | 2006                    | 6.3                           | 111230                       | Higher coverage             |
| KGZ       | Ministry of Health          | 2007                    | 6.0                           | 122540                       | Higher coverage             |
| KGZ       | Ministry of Health          | 2008                    | 5.9                           | 130380                       | Higher coverage             |
| KGZ       | Ministry of Health          | 2009                    | 5.8                           | 137680                       | Higher coverage             |
| KGZ       | Ministry of Health          | 2010                    | 5.7                           | 141730                       | Higher coverage             |
| KGZ       | Ministry of Health          | 2011                    | 5.6                           | 142570                       | Higher coverage             |
| KGZ       | Ministry of Health          | 2012                    | 5.7                           | 147170                       | Higher coverage             |
| KGZ       | Ministry of Health          | 2013                    | 5.7                           | 151530                       | Higher coverage             |
| KGZ       | Ministry of Health          | 2014                    | 5.7                           | 158680                       | Higher coverage             |

| ISO3 code | Data source                               | Year of data collection | Reported low birthweight rate | Number of weighed livebirths | National representativeness |
|-----------|-------------------------------------------|-------------------------|-------------------------------|------------------------------|-----------------------------|
| KGZ       | Ministry of Health                        | 2015                    | 5.4                           | 160140                       | Higher coverage             |
| KOR       | National Statistical Office               | 2000                    | 3.8                           | 634510                       | Higher coverage             |
| KOR       | National Statistical Office               | 2001                    | 4.0                           | 554900                       | Higher coverage             |
| KOR       | National Statistical Office               | 2002                    | 4.0                           | 492120                       | Higher coverage             |
| KOR       | National Statistical Office               | 2003                    | 4.1                           | 490550                       | Higher coverage             |
| KOR       | National Statistical Office               | 2004                    | 4.2                           | 472770                       | Higher coverage             |
| KOR       | National Statistical Office               | 2005                    | 4.3                           | 435040                       | Higher coverage             |
| KOR       | National Statistical Office               | 2006                    | 4.4                           | 448160                       | Higher coverage             |
| KOR       | National Statistical Office               | 2007                    | 4.7                           | 493190                       | Higher coverage             |
| KOR       | National Statistical Office               | 2008                    | 4.9                           | 465900                       | Higher coverage             |
| KOR       | National Statistical Office               | 2009                    | 5.0                           | 444850                       | Higher coverage             |
| KOR       | National Statistical Office               | 2010                    | 5.0                           | 470180                       | Higher coverage             |
| KOR       | National Statistical Office               | 2011                    | 5.2                           | 471270                       | Higher coverage             |
| KOR       | National Statistical Office               | 2012                    | 5.3                           | 484550                       | Higher coverage             |
| KOR       | National Statistical Office               | 2013                    | 5.5                           | 436460                       | Higher coverage             |
| KOR       | National Statistical Office               | 2014                    | 5.7                           | 435440                       | Higher coverage             |
| KOR       | National Statistical Office               | 2015                    | 5.7                           | 438420                       | Higher coverage             |
| KWT       | National Statistical Office               | 2000                    | 8.2                           | 41850                        | Higher coverage             |
| KWT       | National Statistical Office               | 2001                    | 8.3                           | 41350                        | Higher coverage             |
| KWT       | National Statistical Office               | 2002                    | 8.2                           | 43490                        | Higher coverage             |
| KWT       | National Statistical Office               | 2003                    | 8.2                           | 43990                        | Higher coverage             |
| KWT       | National Statistical Office               | 2004                    | 8.7                           | 47280                        | Higher coverage             |
| KWT       | National Statistical Office               | 2005                    | 8.5                           | 50950                        | Higher coverage             |
| KWT       | National Statistical Office               | 2006                    | 9.3                           | 52760                        | Higher coverage             |
| KWT       | National Statistical Office               | 2007                    | 9.7                           | 53590                        | Higher coverage             |
| LBN       | National Statistical Office               | 2011                    | 7.5                           | 77240                        | Higher coverage             |
| LBN       | National Statistical Office               | 2012                    | 7.5                           | 79430                        | Higher coverage             |
| LBN       | National Statistical Office               | 2013                    | 7.6                           | 89380                        | Higher coverage             |
| LBN       | National Vital Data Observatory, MOPH     | 2014                    | 8.1                           | 105350                       | Higher coverage             |
| LBN       | National Vital Data Observatory, MOPH     | 2015                    | 8.8                           | 110420                       | Higher coverage             |
| LKA       | Routine hospital based information system | 2000                    | 16.7                          | 339440                       | Higher coverage             |
| LKA       | Routine hospital based information system | 2001                    | 16.1                          | NA                           | Higher coverage             |
| LKA       | Routine hospital based information system | 2002                    | 17.1                          | NA                           | Higher coverage             |
| LKA       | Routine hospital based information system | 2003                    | 16.9                          | NA                           | Higher coverage             |
| LKA       | Routine hospital based information system | 2005                    | 17.6                          | 339440                       | Higher coverage             |

| ISO3 code | Data source                               | Year of data collection | Reported low birthweight rate | Number of weighed livebirths | National representativeness |
|-----------|-------------------------------------------|-------------------------|-------------------------------|------------------------------|-----------------------------|
| LKA       | Routine hospital based information system | 2006                    | 17.0                          | NA                           | Higher coverage             |
| LKA       | Routine hospital based information system | 2007                    | 17.3                          | NA                           | Higher coverage             |
| LKA       | Routine hospital based information system | 2008                    | 17.6                          | NA                           | Higher coverage             |
| LKA       | Routine hospital based information system | 2009                    | 17.2                          | 339440                       | Higher coverage             |
| LKA       | Routine hospital based information system | 2010                    | 16.9                          | 336770                       | Higher coverage             |
| LKA       | Routine hospital based information system | 2011                    | 16.6                          | 340930                       | Higher coverage             |
| LKA       | Routine hospital based information system | 2012                    | 16.3                          | 340800                       | Higher coverage             |
| LKA       | Routine hospital based information system | 2013                    | 16.7                          | 347040                       | Higher coverage             |
| LKA       | Routine hospital based information system | 2014                    | 16.0                          | 315230                       | Higher coverage             |
| LKA       | Routine hospital based information system | 2015                    | 16.0                          | 330900                       | Higher coverage             |
| LTU       | Consultation                              | 2000                    | 4.6                           | 33800                        | Higher coverage             |
| LTU       | Consultation                              | 2001                    | 4.5                           | 31050                        | Higher coverage             |
| LTU       | Consultation                              | 2002                    | 4.9                           | 29420                        | Higher coverage             |
| LTU       | Consultation                              | 2003                    | 4.7                           | 29770                        | Higher coverage             |
| LTU       | Consultation                              | 2004                    | 4.5                           | 29480                        | Higher coverage             |
| LTU       | Consultation                              | 2005                    | 4.7                           | 29130                        | Higher coverage             |
| LTU       | Consultation                              | 2006                    | 4.6                           | 29070                        | Higher coverage             |
| LTU       | Consultation                              | 2007                    | 4.5                           | 29360                        | Higher coverage             |
| LTU       | Consultation                              | 2008                    | 4.6                           | 31290                        | Higher coverage             |
| LTU       | Consultation                              | 2009                    | 4.5                           | 32450                        | Higher coverage             |
| LTU       | Consultation                              | 2010                    | 4.7                           | 30830                        | Higher coverage             |
| LTU       | Consultation                              | 2011                    | 4.7                           | 28890                        | Higher coverage             |
| LTU       | Consultation                              | 2012                    | 4.8                           | 28470                        | Higher coverage             |
| LTU       | Consultation                              | 2013                    | 4.6                           | 27320                        | Moderate coverage           |
| LTU       | Consultation                              | 2014                    | 4.5                           | 28070                        | Moderate coverage           |
| LTU       | Consultation                              | 2015                    | 4.5                           | 28900                        | Higher coverage             |
| LUX       | SUSANA-database                           | 2001                    | 6.0                           | 5500                         | Higher coverage             |
| LUX       | SUSANA-database                           | 2002                    | 6.1                           | 5410                         | Higher coverage             |
| LUX       | SUSANA-database                           | 2003                    | 4.9                           | 5330                         | Higher coverage             |
| LUX       | SUSANA-database                           | 2004                    | 6.3                           | 5660                         | Higher coverage             |
| LUX       | SUSANA-database                           | 2005                    | 6.1                           | 5630                         | Higher coverage             |
| LUX       | SUSANA-database                           | 2006                    | 5.7                           | 5810                         | Higher coverage             |
| LUX       | SUSANA-database                           | 2007                    | 4.8                           | 5740                         | Higher coverage             |
| LUX       | SUSANA-database                           | 2008                    | 6.5                           | 6070                         | Higher coverage             |

| ISO3 code | Data source                                                                        | Year of data collection | Reported low birthweight rate | Number of weighed livebirths | National representativeness |
|-----------|------------------------------------------------------------------------------------|-------------------------|-------------------------------|------------------------------|-----------------------------|
| LUX       | SUSANA-database                                                                    | 2009                    | 6.5                           | 6170                         | Higher coverage             |
| LUX       | SUSANA-database                                                                    | 2010                    | 6.7                           | 6520                         | Higher coverage             |
| LUX       | SUSANA-database                                                                    | 2011                    | 6.7                           | 6320                         | Higher coverage             |
| LUX       | SUSANA-database                                                                    | 2012                    | 6.5                           | 6650                         | Higher coverage             |
| LUX       | SUSANA-database                                                                    | 2013                    | 7.1                           | 6790                         | Higher coverage             |
| LUX       | SUSANA-database                                                                    | 2014                    | 6.6                           | 6960                         | Higher coverage             |
| LUX       | SUSANA-database                                                                    | 2015                    | 6.5                           | 6840                         | Higher coverage             |
| LVA       | Centre for Disease Prevention and Control (CDPC) of Latvia, Medical Birth Register | 2000                    | 5.0                           | 20220                        | Higher coverage             |
| LVA       | Centre for Disease Prevention and Control (CDPC) of Latvia, Medical Birth Register | 2001                    | 5.2                           | 19610                        | Higher coverage             |
| LVA       | Centre for Disease Prevention and Control (CDPC) of Latvia, Medical Birth Register | 2002                    | 5.0                           | 20000                        | Higher coverage             |
| LVA       | Centre for Disease Prevention and Control (CDPC) of Latvia, Medical Birth Register | 2003                    | 5.1                           | 20990                        | Higher coverage             |
| LVA       | Centre for Disease Prevention and Control (CDPC) of Latvia, Medical Birth Register | 2004                    | 5.0                           | 20360                        | Higher coverage             |
| LVA       | Centre for Disease Prevention and Control (CDPC) of Latvia, Medical Birth Register | 2005                    | 4.9                           | 21540                        | Higher coverage             |
| LVA       | Centre for Disease Prevention and Control (CDPC) of Latvia, Medical Birth Register | 2006                    | 4.6                           | 22300                        | Higher coverage             |
| LVA       | Centre for Disease Prevention and Control (CDPC) of Latvia, Medical Birth Register | 2007                    | 5.1                           | 23280                        | Higher coverage             |
| LVA       | Centre for Disease Prevention and Control (CDPC) of Latvia, Medical Birth Register | 2008                    | 4.3                           | 23970                        | Higher coverage             |
| LVA       | Centre for Disease Prevention and Control (CDPC) of Latvia, Medical Birth Register | 2009                    | 4.4                           | 21680                        | Higher coverage             |
| LVA       | Centre for Disease Prevention and Control (CDPC) of Latvia, Medical Birth Register | 2010                    | 4.8                           | 19140                        | Moderate coverage           |
| LVA       | Centre for Disease Prevention and Control (CDPC) of Latvia, Medical Birth Register | 2011                    | 4.7                           | 18450                        | Moderate coverage           |
| LVA       | Centre for Disease Prevention and Control (CDPC) of Latvia, Medical Birth Register | 2012                    | 4.6                           | 19550                        | Higher coverage             |



| ISO3 code | Data source                                                                        | Year of data collection | Reported low birthweight rate | Number of weighed livebirths | National representativeness |
|-----------|------------------------------------------------------------------------------------|-------------------------|-------------------------------|------------------------------|-----------------------------|
| LVA       | Centre for Disease Prevention and Control (CDPC) of Latvia, Medical Birth Register | 2013                    | 4.5                           | 20260                        | Higher coverage             |
| LVA       | Centre for Disease Prevention and Control (CDPC) of Latvia, Medical Birth Register | 2014                    | 4.4                           | 21450                        | Higher coverage             |
| LVA       | Centre for Disease Prevention and Control (CDPC) of Latvia, Medical Birth Register | 2015                    | 4.5                           | 21720                        | Higher coverage             |
| MCO       | National Statistical Office                                                        | 2003                    | 6.0                           | 830                          | Higher coverage             |
| MCO       | National Statistical Office                                                        | 2004                    | 4.7                           | 820                          | Higher coverage             |
| MCO       | National Statistical Office                                                        | 2005                    | 5.7                           | 890                          | Higher coverage             |
| MCO       | National Statistical Office                                                        | 2006                    | 5.1                           | 880                          | Higher coverage             |
| MCO       | National Statistical Office                                                        | 2007                    | 5.0                           | 930                          | Higher coverage             |
| MCO       | National Statistical Office                                                        | 2008                    | 4.0                           | 970                          | Higher coverage             |
| MCO       | National Statistical Office                                                        | 2009                    | 5.5                           | 1010                         | Higher coverage             |
| MCO       | National Statistical Office                                                        | 2010                    | 4.6                           | 960                          | Higher coverage             |
| MCO       | National Statistical Office                                                        | 2011                    | 7.5                           | 1040                         | Higher coverage             |
| MCO       | National Statistical Office                                                        | 2012                    | 6.3                           | 980                          | Higher coverage             |
| MCO       | National Statistical Office                                                        | 2013                    | 6.0                           | 1000                         | Higher coverage             |
| MCO       | National Statistical Office                                                        | 2014                    | 5.3                           | 980                          | Higher coverage             |
| MCO       | National Statistical Office                                                        | 2015                    | 5.9                           | 1070                         | Higher coverage             |
| MDA       | National Statistical Office                                                        | 2002                    | 5.1                           | 35710                        | Moderate coverage           |
| MDA       | National Statistical Office                                                        | 2003                    | 5.3                           | 36480                        | Moderate coverage           |
| MDA       | National Statistical Office                                                        | 2004                    | 4.8                           | 38280                        | Moderate coverage           |
| MDA       | National Statistical Office                                                        | 2005                    | 4.6                           | 37700                        | Moderate coverage           |
| MDA       | National Statistical Office                                                        | 2006                    | 4.9                           | 37590                        | Moderate coverage           |
| MDA       | National Statistical Office                                                        | 2007                    | 5.0                           | 37980                        | Moderate coverage           |
| MDA       | National Statistical Office                                                        | 2008                    | 5.2                           | 39020                        | Moderate coverage           |
| MDA       | National Statistical Office                                                        | 2009                    | 5.2                           | 40810                        | Higher coverage             |
| MDA       | National Statistical Office                                                        | 2010                    | 5.4                           | 40480                        | Moderate coverage           |
| MDA       | National Statistical Office                                                        | 2011                    | 5.1                           | 39190                        | Moderate coverage           |
| MDA       | National Statistical Office                                                        | 2012                    | 4.6                           | 39440                        | Moderate coverage           |
| MDA       | National Statistical Office                                                        | 2013                    | 4.8                           | 37880                        | Moderate coverage           |
| MDA       | National Statistical Office                                                        | 2014                    | 5.2                           | 41210                        | Higher coverage             |
| MDA       | National Statistical Office                                                        | 2015                    | 5.4                           | 41170                        | Higher coverage             |
| MDV       | Ministry of Health                                                                 | 2007                    | 11.6                          | NA                           | Higher coverage             |
| MDV       | Ministry of Health                                                                 | 2008                    | 9.9                           | 6970                         | Higher coverage             |
| MDV       | Ministry of Health                                                                 | 2009                    | 9.8                           | 7430                         | Higher coverage             |
| MDV       | Ministry of Health                                                                 | 2010                    | 11.2                          | 7090                         | Higher coverage             |
| MDV       | Ministry of Health                                                                 | 2011                    | 10.2                          | 7190                         | Higher coverage             |
| MDV       | Ministry of Health                                                                 | 2012                    | 9.8                           | 7140                         | Higher coverage             |

| ISO3 code | Data source                    | Year of data collection | Reported low birthweight rate | Number of weighed livebirths | National representativeness |
|-----------|--------------------------------|-------------------------|-------------------------------|------------------------------|-----------------------------|
| MDV       | istrative data                 | 2014                    | 9.5                           | 7250                         | Higher coverage             |
| MEX       | National Statistical Office    | 2008                    | 8.2                           | 1978380                      | Moderate coverage           |
| MEX       | National Statistical Office    | 2009                    | 8.5                           | 2058710                      | Moderate coverage           |
| MEX       | National Statistical Office    | 2010                    | 8.5                           | 2073120                      | Moderate coverage           |
| MEX       | National Statistical Office    | 2011                    | 5.7                           | 2167060                      | Higher coverage             |
| MEX       | National Statistical Office    | 2012                    | 5.8                           | 2206700                      | Higher coverage             |
| MEX       | National Statistical Office    | 2013                    | 5.9                           | 2195080                      | Higher coverage             |
| MEX       | National Statistical Office    | 2014                    | 6.1                           | 2177320                      | Higher coverage             |
| MEX       | National Statistical Office    | 2015                    | 6.1                           | 2145200                      | Higher coverage             |
| MKD       | National Statistical Office    | 2000                    | 9.4                           | 29310                        | Higher coverage             |
| MKD       | National Statistical Office    | 2001                    | 8.1                           | 27010                        | Higher coverage             |
| MKD       | National Statistical Office    | 2002                    | 8.8                           | 27770                        | Higher coverage             |
| MKD       | National Statistical Office    | 2003                    | 9.4                           | 27020                        | Higher coverage             |
| MKD       | National Statistical Office    | 2004                    | 8.1                           | 23370                        | Higher coverage             |
| MKD       | National Statistical Office    | 2005                    | 8.8                           | 22490                        | Higher coverage             |
| MKD       | National Statistical Office    | 2006                    | 9.4                           | 22590                        | Higher coverage             |
| MKD       | National Statistical Office    | 2007                    | 8.1                           | 22690                        | Higher coverage             |
| MKD       | National Statistical Office    | 2008                    | 8.8                           | 22950                        | Higher coverage             |
| MKD       | National Statistical Office    | 2009                    | 9.4                           | 23690                        | Higher coverage             |
| MKD       | National Statistical Office    | 2010                    | 8.1                           | 24300                        | Higher coverage             |
| MKD       | National Statistical Office    | 2011                    | 8.8                           | 22770                        | Higher coverage             |
| MKD       | National Statistical Office    | 2012                    | 9.4                           | 23570                        | Higher coverage             |
| MKD       | National Statistical Office    | 2013                    | 8.1                           | 23140                        | Higher coverage             |
| MKD       | National Statistical Office    | 2014                    | 8.8                           | 23600                        | Higher coverage             |
| MKD       | National Statistical Office    | 2015                    | 9.4                           | 23080                        | Higher coverage             |
| MLT       | National obstetric info system | 2000                    | 5.9                           | 4370                         | Higher coverage             |
| MLT       | National obstetric info system | 2001                    | 5.9                           | 3940                         | Higher coverage             |
| MLT       | National obstetric info system | 2002                    | 5.9                           | 3910                         | Higher coverage             |
| MLT       | National obstetric info system | 2003                    | 7.1                           | 4040                         | Higher coverage             |
| MLT       | National obstetric info system | 2004                    | 7.7                           | 3890                         | Higher coverage             |
| MLT       | National obstetric info system | 2005                    | 6.5                           | 3860                         | Higher coverage             |
| MLT       | National obstetric info system | 2006                    | 6.4                           | 3880                         | Higher coverage             |
| MLT       | National obstetric info system | 2007                    | 6.4                           | 3890                         | Higher coverage             |
| MLT       | National obstetric info system | 2008                    | 6.8                           | 4200                         | Higher coverage             |
| MLT       | National obstetric info system | 2009                    | 7.3                           | 4160                         | Higher coverage             |
| MLT       | National obstetric info system | 2010                    | 7.2                           | 4020                         | Higher coverage             |
| MLT       | National obstetric info system | 2011                    | 7.8                           | 4290                         | Higher coverage             |
| MLT       | National obstetric info system | 2012                    | 7.0                           | 4240                         | Higher coverage             |
| MLT       | National obstetric info system | 2013                    | 6.6                           | 4130                         | Higher coverage             |
| MLT       | National obstetric info system | 2014                    | 6.5                           | 4310                         | Higher coverage             |
| MLT       | National obstetric info system | 2015                    | 6.3                           | 4440                         | Higher coverage             |

| ISO3 code | Data source                 | Year of data collection | Reported low birthweight rate | Number of weighed livebirths | National representativeness |
|-----------|-----------------------------|-------------------------|-------------------------------|------------------------------|-----------------------------|
| MNE       | Institute of Public Health  | 2000                    | 5.1                           | 8840                         | Higher coverage             |
| MNE       | Institute of Public Health  | 2001                    | 4.8                           | 8500                         | Higher coverage             |
| MNE       | Institute of Public Health  | 2002                    | 4.9                           | 8350                         | Higher coverage             |
| MNE       | Institute of Public Health  | 2003                    | 4.9                           | 7850                         | Higher coverage             |
| MNE       | Institute of Public Health  | 2004                    | 4.8                           | 7360                         | Moderate coverage           |
| MNE       | Institute of Public Health  | 2005                    | 4.9                           | 7540                         | Higher coverage             |
| MNE       | Institute of Public Health  | 2006                    | 4.2                           | 7840                         | Higher coverage             |
| MNE       | Institute of Public Health  | 2007                    | 3.9                           | 8260                         | Higher coverage             |
| MNE       | Institute of Public Health  | 2008                    | 4.4                           | 8650                         | Higher coverage             |
| MNE       | Institute of Public Health  | 2009                    | 5.1                           | 7420                         | Higher coverage             |
| MNE       | Institute of Public Health  | 2010                    | 5.2                           | 7800                         | Higher coverage             |
| MNE       | Institute of Public Health  | 2011                    | 5.6                           | 7570                         | Higher coverage             |
| MNE       | Institute of Public Health  | 2012                    | 5.1                           | 7610                         | Higher coverage             |
| MNE       | Institute of Public Health  | 2013                    | 5.0                           | 6940                         | Higher coverage             |
| MNE       | Institute of Public Health  | 2014                    | 5.5                           | 7410                         | Higher coverage             |
| MNE       | Institute of Public Health  | 2015                    | 5.4                           | 7360                         | Higher coverage             |
| MUS       | National Statistical Office | 2000                    | 12.9                          | 16780                        | Moderate coverage           |
| MUS       | National Statistical Office | 2001                    | 12.9                          | 16780                        | Moderate coverage           |
| MUS       | National Statistical Office | 2002                    | 13.0                          | 16780                        | Moderate coverage           |
| MUS       | National Statistical Office | 2003                    | 13.8                          | 16780                        | Moderate coverage           |
| MUS       | National Statistical Office | 2004                    | 14.3                          | 16780                        | Higher coverage             |
| MUS       | National Statistical Office | 2005                    | 15.8                          | 16780                        | Higher coverage             |
| MUS       | National Statistical Office | 2006                    | 14.3                          | 17610                        | Higher coverage             |
| MUS       | National Statistical Office | 2007                    | 15.7                          | 17040                        | Higher coverage             |
| MUS       | National Statistical Office | 2008                    | 14.9                          | 16380                        | Higher coverage             |
| MUS       | National Statistical Office | 2009                    | 16.4                          | 15350                        | Higher coverage             |
| MUS       | National Statistical Office | 2010                    | 17.1                          | 15010                        | Higher coverage             |
| MUS       | National Statistical Office | 2011                    | 17.0                          | 14710                        | Higher coverage             |
| MUS       | National Statistical Office | 2012                    | 17.0                          | 14500                        | Higher coverage             |
| MUS       | National Statistical Office | 2013                    | 16.7                          | 13690                        | Higher coverage             |
| MUS       | National Statistical Office | 2014                    | 16.9                          | 13420                        | Higher coverage             |
| MUS       | National Statistical Office | 2015                    | 17.3                          | 12740                        | Higher coverage             |
| MYS       | Consultation                | 2001                    | 9.9                           | 515990                       | Higher coverage             |
| MYS       | Consultation                | 2002                    | 9.9                           | 484040                       | Higher coverage             |
| MYS       | Consultation                | 2003                    | 9.9                           | 480090                       | Higher coverage             |
| MYS       | Consultation                | 2004                    | 10.1                          | 477770                       | Higher coverage             |
| MYS       | Consultation                | 2005                    | 10.1                          | 469210                       | Higher coverage             |
| MYS       | Consultation                | 2006                    | 10.4                          | 465120                       | Higher coverage             |
| MYS       | Consultation                | 2007                    | 10.7                          | 472050                       | Higher coverage             |
| MYS       | Consultation                | 2008                    | 10.7                          | 487350                       | Higher coverage             |
| MYS       | Consultation                | 2009                    | 10.9                          | 496320                       | Higher coverage             |

| ISO3 code | Data source                 | Year of data collection | Reported low birthweight rate | Number of weighed livebirths | National representativeness |
|-----------|-----------------------------|-------------------------|-------------------------------|------------------------------|-----------------------------|
| MYS       | Consultation                | 2010                    | 11.3                          | 491240                       | Higher coverage             |
| MYS       | Consultation                | 2011                    | 11.2                          | 511600                       | Higher coverage             |
| MYS       | Consultation                | 2012                    | 11.3                          | 526020                       | Higher coverage             |
| MYS       | Consultation                | 2013                    | 11.2                          | 503920                       | Higher coverage             |
| MYS       | Consultation                | 2015                    | 11.4                          | 521140                       | Higher coverage             |
| NLD       | Perined                     | 2001                    | 6.9                           | 188630                       | Higher coverage             |
| NLD       | Perined                     | 2002                    | 6.6                           | 188140                       | Higher coverage             |
| NLD       | Perined                     | 2003                    | 6.5                           | 190060                       | Higher coverage             |
| NLD       | Perined                     | 2004                    | 6.4                           | 181010                       | Higher coverage             |
| NLD       | Perined                     | 2005                    | 6.4                           | 176330                       | Higher coverage             |
| NLD       | Perined                     | 2006                    | 6.3                           | 175000                       | Higher coverage             |
| NLD       | Perined                     | 2007                    | 6.2                           | 172290                       | Higher coverage             |
| NLD       | Perined                     | 2008                    | 6.2                           | 176570                       | Higher coverage             |
| NLD       | Perined                     | 2009                    | 6.1                           | 179530                       | Higher coverage             |
| NLD       | Perined                     | 2010                    | 6.2                           | 178270                       | Higher coverage             |
| NLD       | Perined                     | 2011                    | 6.0                           | 177620                       | Higher coverage             |
| NLD       | Perined                     | 2012                    | 6.1                           | 175190                       | Higher coverage             |
| NLD       | Perined                     | 2013                    | 6.3                           | 169000                       | Higher coverage             |
| NLD       | Perined                     | 2014                    | 6.3                           | 174400                       | Higher coverage             |
| NLD       | Perined                     | 2015                    | 6.1                           | 168460                       | Higher coverage             |
| NOR       | National Statistical Office | 2000                    | 4.9                           | 59410                        | Higher coverage             |
| NOR       | National Statistical Office | 2001                    | 5.0                           | 56940                        | Higher coverage             |
| NOR       | National Statistical Office | 2002                    | 5.1                           | 56000                        | Higher coverage             |
| NOR       | National Statistical Office | 2003                    | 5.0                           | 57150                        | Higher coverage             |
| NOR       | National Statistical Office | 2004                    | 4.9                           | 57530                        | Higher coverage             |
| NOR       | National Statistical Office | 2005                    | 4.9                           | 57250                        | Higher coverage             |
| NOR       | National Statistical Office | 2006                    | 4.9                           | 59000                        | Higher coverage             |
| NOR       | National Statistical Office | 2007                    | 5.1                           | 58960                        | Higher coverage             |
| NOR       | National Statistical Office | 2008                    | 5.0                           | 61190                        | Higher coverage             |
| NOR       | National Statistical Office | 2009                    | 4.9                           | 62760                        | Higher coverage             |
| NOR       | National Statistical Office | 2010                    | 4.9                           | 62350                        | Higher coverage             |
| NOR       | National Statistical Office | 2011                    | 4.6                           | 61100                        | Higher coverage             |
| NOR       | National Statistical Office | 2012                    | 4.7                           | 61150                        | Higher coverage             |
| NOR       | National Statistical Office | 2013                    | 4.6                           | 59760                        | Higher coverage             |
| NOR       | National Statistical Office | 2014                    | 4.6                           | 59760                        | Higher coverage             |
| NOR       | National Statistical Office | 2015                    | 4.5                           | 59710                        | Higher coverage             |
| NZL       | National Statistical Office | 2000                    | 6.3                           | 57000                        | Higher coverage             |
| NZL       | National Statistical Office | 2001                    | 6.5                           | 56230                        | Higher coverage             |
| NZL       | National Statistical Office | 2002                    | 6.5                           | 54520                        | Higher coverage             |
| NZL       | National Statistical Office | 2003                    | 6.1                           | 56580                        | Higher coverage             |
| NZL       | National Statistical Office | 2004                    | 6.1                           | 58730                        | Higher coverage             |

| ISO3 code | Data source                 | Year of data collection | Reported low birthweight rate | Number of weighed livebirths | National representativeness |
|-----------|-----------------------------|-------------------------|-------------------------------|------------------------------|-----------------------------|
| NZL       | National Statistical Office | 2005                    | 6.0                           | 58730                        | Higher coverage             |
| NZL       | National Statistical Office | 2006                    | 5.8                           | 60280                        | Higher coverage             |
| NZL       | National Statistical Office | 2007                    | 5.9                           | 65130                        | Higher coverage             |
| NZL       | National Statistical Office | 2008                    | 5.9                           | 65340                        | Higher coverage             |
| NZL       | National Statistical Office | 2009                    | 5.9                           | 63290                        | Higher coverage             |
| NZL       | National Statistical Office | 2010                    | 5.8                           | 64700                        | Higher coverage             |
| NZL       | National Statistical Office | 2011                    | 5.9                           | 62180                        | Higher coverage             |
| NZL       | National Statistical Office | 2012                    | 6.1                           | 62040                        | Higher coverage             |
| NZL       | National Statistical Office | 2013                    | 5.9                           | 59710                        | Higher coverage             |
| NZL       | National Statistical Office | 2014                    | 5.6                           | 59510                        | Higher coverage             |
| NZL       | National Statistical Office | 2015                    | 5.7                           | 59310                        | Higher coverage             |
| OMN       | Ministry of Health          | 2000                    | 8.1                           | 58000                        | Higher coverage             |
| OMN       | Ministry of Health          | 2001                    | 7.9                           | 58000                        | Higher coverage             |
| OMN       | Ministry of Health          | 2002                    | 7.9                           | 58000                        | Higher coverage             |
| OMN       | Ministry of Health          | 2003                    | 8.5                           | 58000                        | Higher coverage             |
| OMN       | Ministry of Health          | 2004                    | 8.2                           | 58000                        | Higher coverage             |
| OMN       | Ministry of Health          | 2005                    | 8.3                           | 58000                        | Higher coverage             |
| OMN       | Ministry of Health          | 2006                    | 8.9                           | 58000                        | Higher coverage             |
| OMN       | Ministry of Health          | 2007                    | 9.2                           | 58000                        | Higher coverage             |
| OMN       | Ministry of Health          | 2008                    | 9.2                           | 58000                        | Higher coverage             |
| OMN       | National Statistical Office | 2010                    | 10.1                          | 58000                        | Moderate coverage           |
| OMN       | National Statistical Office | 2012                    | 9.5                           | 61730                        | Moderate coverage           |
| OMN       | National Statistical Office | 2013                    | 10.2                          | 67240                        | Moderate coverage           |
| OMN       | National Statistical Office | 2014                    | 10.6                          | 67240                        | Moderate coverage           |
| OMN       | National Statistical Office | 2015                    | 10.6                          | 70620                        | Moderate coverage           |
| PAN       | National Statistical Office | 2000                    | 9.2                           | 64840                        | Higher coverage             |
| PAN       | National Statistical Office | 2001                    | 9.3                           | 63900                        | Moderate coverage           |
| PAN       | National Statistical Office | 2002                    | 9.6                           | 61680                        | Moderate coverage           |
| PAN       | National Statistical Office | 2003                    | 10.3                          | 61760                        | Moderate coverage           |
| PAN       | National Statistical Office | 2004                    | 9.8                           | 62750                        | Moderate coverage           |
| PAN       | National Statistical Office | 2006                    | 9.3                           | 59860                        | Moderate coverage           |
| PAN       | National Statistical Office | 2007                    | 8.5                           | 61650                        | Moderate coverage           |
| PAN       | National Statistical Office | 2008                    | 9.1                           | 63140                        | Moderate coverage           |
| PAN       | National Statistical Office | 2009                    | 9.1                           | 68370                        | Moderate coverage           |
| PAN       | National Statistical Office | 2010                    | 8.8                           | 63020                        | Moderate coverage           |
| PAN       | National Statistical Office | 2011                    | 8.3                           | 68550                        | Moderate coverage           |
| PAN       | National Statistical Office | 2012                    | 8.0                           | 71160                        | Higher coverage             |
| PAN       | National Statistical Office | 2013                    | 7.7                           | 68510                        | Moderate coverage           |
| PAN       | National Statistical Office | 2014                    | 7.8                           | 70580                        | Moderate coverage           |
| PAN       | National Statistical Office | 2015                    | 7.8                           | 72100                        | Higher coverage             |
| POL       | National Statistical Office | 2000                    | 5.7                           | 378350                       | Higher coverage             |

| ISO3 code | Data source                              | Year of data collection | Reported low birthweight rate | Number of weighed livebirths | National representativeness |
|-----------|------------------------------------------|-------------------------|-------------------------------|------------------------------|-----------------------------|
| POL       | National Statistical Office              | 2001                    | 5.8                           | 368210                       | Higher coverage             |
| POL       | National Statistical Office              | 2002                    | 5.9                           | 353770                       | Higher coverage             |
| POL       | National Statistical Office              | 2003                    | 5.9                           | 351080                       | Higher coverage             |
| POL       | National Statistical Office              | 2004                    | 6.1                           | 356140                       | Higher coverage             |
| POL       | National Statistical Office              | 2005                    | 6.0                           | 364390                       | Higher coverage             |
| POL       | National Statistical Office              | 2006                    | 6.0                           | 374250                       | Higher coverage             |
| POL       | National Statistical Office              | 2007                    | 6.0                           | 387880                       | Higher coverage             |
| POL       | National Statistical Office              | 2008                    | 5.6                           | 414500                       | Higher coverage             |
| POL       | National Statistical Office              | 2009                    | 5.7                           | 417590                       | Higher coverage             |
| POL       | National Statistical Office              | 2010                    | 5.6                           | 413300                       | Higher coverage             |
| POL       | National Statistical Office              | 2011                    | 5.6                           | 388420                       | Higher coverage             |
| POL       | Central Statistical Office               | 2012                    | 5.7                           | 386260                       | Higher coverage             |
| POL       | Central Statistical Office               | 2013                    | 6.0                           | 369580                       | Higher coverage             |
| POL       | Central Statistical Office               | 2014                    | 5.9                           | 375160                       | Higher coverage             |
| POL       | Central Statistical Office               | 2015                    | 5.8                           | 369310                       | Higher coverage             |
| PRT       | National Statistical Office              | 2000                    | 7.1                           | 120010                       | Higher coverage             |
| PRT       | National Statistical Office              | 2001                    | 7.9                           | 112780                       | Higher coverage             |
| PRT       | National Statistical Office              | 2002                    | 7.4                           | 114390                       | Higher coverage             |
| PRT       | National Statistical Office              | 2003                    | 7.4                           | 112520                       | Higher coverage             |
| PRT       | National Statistical Office              | 2004                    | 7.6                           | 109300                       | Higher coverage             |
| PRT       | National Statistical Office              | 2005                    | 7.5                           | 109400                       | Higher coverage             |
| PRT       | National Statistical Office              | 2006                    | 7.6                           | 105450                       | Higher coverage             |
| PRT       | National Statistical Office              | 2007                    | 7.8                           | 102500                       | Higher coverage             |
| PRT       | National Statistical Office              | 2008                    | 7.7                           | 104600                       | Higher coverage             |
| PRT       | National Statistical Office              | 2009                    | 8.2                           | 99500                        | Higher coverage             |
| PRT       | National Statistical Office              | 2010                    | 8.3                           | 101390                       | Higher coverage             |
| PRT       | National Statistical Office              | 2011                    | 8.4                           | 96860                        | Higher coverage             |
| PRT       | National Statistical Office              | 2012                    | 8.5                           | 89850                        | Higher coverage             |
| PRT       | National Statistical Office              | 2013                    | 8.7                           | 82790                        | Higher coverage             |
| PRT       | National Statistical Office              | 2014                    | 8.7                           | 82620                        | Higher coverage             |
| PRT       | National Statistical Office              | 2015                    | 8.9                           | 85780                        | Higher coverage             |
| PRY       | National Statistical Office              | 2014                    | 6.2                           | 112650                       | Moderate coverage           |
| PRY       | National Statistical Office              | 2015                    | 6.0                           | 116190                       | Moderate coverage           |
| PSE       | Palestinian Central Bureau of Statistics | 2003                    | 5.3                           | 101650                       | Moderate coverage           |
| PSE       | Palestinian Central Bureau of Statistics | 2009                    | 8.4                           | 115890                       | Moderate coverage           |
| PSE       | Palestinian Central Bureau of Statistics | 2010                    | 6.4                           | 125590                       | Higher coverage             |
| PSE       | Palestinian Central Bureau of Statistics | 2011                    | 6.4                           | 121500                       | Moderate coverage           |

| ISO3 code | Data source                              | Year of data collection | Reported low birthweight rate | Number of weighed livebirths | National representativeness |
|-----------|------------------------------------------|-------------------------|-------------------------------|------------------------------|-----------------------------|
| PSE       | Palestinian Central Bureau of Statistics | 2012                    | 7.6                           | 118020                       | Moderate coverage           |
| PSE       | Palestinian Central Bureau of Statistics | 2013                    | 9.4                           | 116210                       | Moderate coverage           |
| PSE       | National Statistical Office              | 2014                    | 6.0                           | 121330                       | Moderate coverage           |
| PSE       | National Statistical Office              | 2015                    | 5.7                           | 127270                       | Moderate coverage           |
| QAT       | National Statistical Office              | 2000                    | 8.8                           | 11250                        | Higher coverage             |
| QAT       | National Statistical Office              | 2001                    | 9.5                           | 12120                        | Higher coverage             |
| QAT       | National Statistical Office              | 2002                    | 9.7                           | 12200                        | Higher coverage             |
| QAT       | National Statistical Office              | 2003                    | 7.1                           | 12860                        | Higher coverage             |
| QAT       | National Statistical Office              | 2004                    | 8.4                           | 13190                        | Higher coverage             |
| QAT       | National Statistical Office              | 2005                    | 8.5                           | 13410                        | Higher coverage             |
| QAT       | National Statistical Office              | 2006                    | 8.8                           | 14120                        | Higher coverage             |
| QAT       | National Statistical Office              | 2007                    | 8.3                           | 15690                        | Higher coverage             |
| QAT       | National Statistical Office              | 2008                    | 8.1                           | 17210                        | Higher coverage             |
| QAT       | National Statistical Office              | 2009                    | 7.2                           | 18360                        | Higher coverage             |
| QAT       | National Statistical Office              | 2010                    | 7.6                           | 19510                        | Higher coverage             |
| QAT       | National Statistical Office              | 2011                    | 7.9                           | 20630                        | Higher coverage             |
| ROU       | National Statistical Office              | 2000                    | 8.9                           | 234530                       | Higher coverage             |
| ROU       | National Statistical Office              | 2001                    | 8.9                           | 220370                       | Higher coverage             |
| ROU       | National Statistical Office              | 2002                    | 8.8                           | 210530                       | Higher coverage             |
| ROU       | National Statistical Office              | 2003                    | 9.0                           | 212460                       | Higher coverage             |
| ROU       | National Statistical Office              | 2004                    | 9.5                           | 216270                       | Higher coverage             |
| ROU       | National Statistical Office              | 2005                    | 9.5                           | 221020                       | Higher coverage             |
| ROU       | National Statistical Office              | 2006                    | 8.4                           | 219490                       | Higher coverage             |
| ROU       | National Statistical Office              | 2007                    | 8.1                           | 214730                       | Higher coverage             |
| ROU       | National Statistical Office              | 2008                    | 8.1                           | 221900                       | Higher coverage             |
| ROU       | National Statistical Office              | 2009                    | 7.9                           | 222390                       | Higher coverage             |
| ROU       | National Statistical Office              | 2010                    | 7.8                           | 212200                       | Higher coverage             |
| ROU       | National Statistical Office              | 2011                    | 8.0                           | 196250                       | Higher coverage             |
| ROU       | National Statistical Office              | 2012                    | 8.4                           | 180720                       | Moderate coverage           |
| ROU       | National Statistical Office              | 2013                    | 8.4                           | 188600                       | Higher coverage             |
| ROU       | National Statistical Office              | 2014                    | 8.3                           | 198740                       | Higher coverage             |
| ROU       | National Statistical Office              | 2015                    | 8.1                           | 197500                       | Higher coverage             |
| RUS       | National Statistical Office              | 2000                    | 7.7                           | 1250860                      | Higher coverage             |
| RUS       | National Statistical Office              | 2001                    | 6.4                           | 1300550                      | Higher coverage             |
| RUS       | National Statistical Office              | 2002                    | 6.2                           | 1382980                      | Higher coverage             |
| RUS       | National Statistical Office              | 2003                    | 6.1                           | 1441920                      | Higher coverage             |
| RUS       | National Statistical Office              | 2004                    | 6.1                           | 1466440                      | Higher coverage             |
| RUS       | National Statistical Office              | 2005                    | 6.0                           | 1418970                      | Higher coverage             |
| RUS       | National Statistical Office              | 2006                    | 5.9                           | 1461100                      | Higher coverage             |
| RUS       | National Statistical Office              | 2007                    | 6.0                           | 1584730                      | Higher coverage             |

| <b>ISO3 code</b> | <b>Data source</b>            | <b>Year of data collection</b> | <b>Reported low birthweight rate</b> | <b>Number of weighed livebirths</b> | <b>National representativeness</b> |
|------------------|-------------------------------|--------------------------------|--------------------------------------|-------------------------------------|------------------------------------|
| RUS              | National Statistical Office   | 2008                           | 5.8                                  | 1687400                             | Higher coverage                    |
| RUS              | National Statistical Office   | 2009                           | 5.7                                  | 1736890                             | Higher coverage                    |
| RUS              | National Statistical Office   | 2010                           | 5.8                                  | 1762790                             | Higher coverage                    |
| RUS              | National Statistical Office   | 2011                           | 5.9                                  | 1767610                             | Higher coverage                    |
| RUS              | National Statistical Office   | 2012                           | 6.1                                  | 1871240                             | Higher coverage                    |
| RUS              | National Statistical Office   | 2013                           | 6.2                                  | 1866450                             | Higher coverage                    |
| RUS              | National Statistical Office   | 2014                           | 5.9                                  | 1942690                             | Higher coverage                    |
| SGP              | Registry of Births and Deaths | 2000                           | 8.1                                  | 44770                               | Higher coverage                    |
| SGP              | Registry of Births and Deaths | 2001                           | 8.5                                  | 39290                               | Moderate coverage                  |
| SGP              | Registry of Births and Deaths | 2002                           | 8.4                                  | 38560                               | Moderate coverage                  |
| SLV              | National Statistical Office   | 2009                           | 8.6                                  | 99570                               | Moderate coverage                  |
| SLV              | National Statistical Office   | 2010                           | 8.7                                  | 98360                               | Moderate coverage                  |
| SLV              | National Statistical Office   | 2011                           | 8.7                                  | 103840                              | Moderate coverage                  |
| SLV              | National Statistical Office   | 2012                           | 8.3                                  | 105520                              | Moderate coverage                  |
| SLV              | National Statistical Office   | 2013                           | 9.3                                  | 104630                              | Moderate coverage                  |
| SLV              | National Statistical Office   | 2014                           | 8.9                                  | 105770                              | Moderate coverage                  |
| SLV              | National Statistical Office   | 2015                           | 9.4                                  | 105240                              | Moderate coverage                  |
| SMR              | National Statistical Office   | 2002                           | 2.2                                  | 300                                 | Higher coverage                    |
| SMR              | National Statistical Office   | 2003                           | 2.8                                  | 300                                 | Higher coverage                    |
| SMR              | National Statistical Office   | 2004                           | 2.5                                  | 310                                 | Higher coverage                    |
| SMR              | National Statistical Office   | 2005                           | 3.1                                  | 290                                 | Moderate coverage                  |
| SMR              | National Statistical Office   | 2006                           | 3.6                                  | 310                                 | Higher coverage                    |
| SMR              | National Statistical Office   | 2008                           | 3.8                                  | 350                                 | Higher coverage                    |
| SMR              | National Statistical Office   | 2009                           | 3.5                                  | 310                                 | Higher coverage                    |
| SMR              | National Statistical Office   | 2010                           | 4.0                                  | 340                                 | Higher coverage                    |
| SMR              | National Statistical Office   | 2011                           | 3.3                                  | 330                                 | Higher coverage                    |
| SMR              | National Statistical Office   | 2012                           | 2.6                                  | 300                                 | Higher coverage                    |
| SMR              | National Statistical Office   | 2013                           | 3.1                                  | 320                                 | Higher coverage                    |
| SMR              | National Statistical Office   | 2014                           | 4.5                                  | 300                                 | Higher coverage                    |
| SMR              | National Statistical Office   | 2015                           | 3.8                                  | 270                                 | Higher coverage                    |
| STP              | National Statistical Office   | 2012                           | 5.0                                  | 5430                                | Moderate coverage                  |
| STP              | National Statistical Office   | 2013                           | 5.3                                  | 5320                                | Moderate coverage                  |
| STP              | National Statistical Office   | 2014                           | 4.4                                  | 5600                                | Moderate coverage                  |
| STP              | National Statistical Office   | 2015                           | 4.6                                  | 5550                                | Moderate coverage                  |
| SUR              | National Statistical Office   | 2007                           | 13.5                                 | 8400                                | Moderate coverage                  |
| SUR              | National Statistical Office   | 2008                           | 12.4                                 | 8810                                | Moderate coverage                  |
| SUR              | National Statistical Office   | 2011                           | 13.1                                 | 8480                                | Moderate coverage                  |
| SUR              | National Statistical Office   | 2012                           | 14.6                                 | 8590                                | Moderate coverage                  |
| SUR              | National Statistical Office   | 2013                           | 13.9                                 | 8720                                | Moderate coverage                  |
| SUR              | National Statistical Office   | 2014                           | 13.3                                 | 9150                                | Moderate coverage                  |
| SVK              | National Statistical Office   | 2000                           | 6.7                                  | 55160                               | Higher coverage                    |



| ISO3 code | Data source                 | Year of data collection | Reported low birthweight rate | Number of weighed livebirths | National representativeness |
|-----------|-----------------------------|-------------------------|-------------------------------|------------------------------|-----------------------------|
| SVK       | National Statistical Office | 2001                    | 7.0                           | 51140                        | Higher coverage             |
| SVK       | National Statistical Office | 2002                    | 6.9                           | 50850                        | Higher coverage             |
| SVK       | National Statistical Office | 2003                    | 7.0                           | 51720                        | Higher coverage             |
| SVK       | National Statistical Office | 2004                    | 7.2                           | 53750                        | Higher coverage             |
| SVK       | National Statistical Office | 2005                    | 7.3                           | 54430                        | Higher coverage             |
| SVK       | National Statistical Office | 2006                    | 7.3                           | 53910                        | Higher coverage             |
| SVK       | National Statistical Office | 2007                    | 7.5                           | 54430                        | Higher coverage             |
| SVK       | National Statistical Office | 2008                    | 7.3                           | 57360                        | Higher coverage             |
| SVK       | National Statistical Office | 2009                    | 7.4                           | 61220                        | Higher coverage             |
| SVK       | National Statistical Office | 2010                    | 9.0                           | 60410                        | Higher coverage             |
| SVK       | National Statistical Office | 2011                    | 8.1                           | 60820                        | Higher coverage             |
| SVK       | National Statistical Office | 2012                    | 7.9                           | 55540                        | Higher coverage             |
| SVK       | National Statistical Office | 2013                    | 7.6                           | 54830                        | Higher coverage             |
| SVK       | National Statistical Office | 2014                    | 7.8                           | 55040                        | Higher coverage             |
| SVK       | National Statistical Office | 2015                    | 7.7                           | 55610                        | Higher coverage             |
| SVN       | National Statistical Office | 2000                    | 5.6                           | 18120                        | Higher coverage             |
| SVN       | National Statistical Office | 2001                    | 5.7                           | 17420                        | Higher coverage             |
| SVN       | National Statistical Office | 2002                    | 6.0                           | 17490                        | Higher coverage             |
| SVN       | National Statistical Office | 2003                    | 5.9                           | 17070                        | Higher coverage             |
| SVN       | National Statistical Office | 2004                    | 5.8                           | 17810                        | Higher coverage             |
| SVN       | National Statistical Office | 2005                    | 6.0                           | 18090                        | Higher coverage             |
| SVN       | National Statistical Office | 2006                    | 5.8                           | 18950                        | Higher coverage             |
| SVN       | National Statistical Office | 2007                    | 6.3                           | 19820                        | Higher coverage             |
| SVN       | National Statistical Office | 2008                    | 6.3                           | 21760                        | Higher coverage             |
| SVN       | National Statistical Office | 2009                    | 5.9                           | 21650                        | Higher coverage             |
| SVN       | National Statistical Office | 2010                    | 6.2                           | 22200                        | Higher coverage             |
| SVN       | National Statistical Office | 2011                    | 6.2                           | 21740                        | Higher coverage             |
| SVN       | National Statistical Office | 2012                    | 6.0                           | 21700                        | Higher coverage             |
| SVN       | National Statistical Office | 2013                    | 6.2                           | 21120                        | Higher coverage             |
| SWE       | Medical Birth registry      | 2000                    | 4.4                           | 89380                        | Higher coverage             |
| SWE       | Medical Birth registry      | 2001                    | 4.3                           | 90190                        | Higher coverage             |
| SWE       | Medical Birth registry      | 2002                    | 4.3                           | 94750                        | Higher coverage             |
| SWE       | Medical Birth registry      | 2003                    | 4.3                           | 98140                        | Higher coverage             |
| SWE       | Medical Birth registry      | 2004                    | 4.2                           | 100670                       | Higher coverage             |
| SWE       | Medical Birth registry      | 2005                    | 4.1                           | 100460                       | Higher coverage             |
| SWE       | Medical Birth registry      | 2006                    | 4.3                           | 104300                       | Higher coverage             |
| SWE       | Medical Birth registry      | 2007                    | 4.2                           | 105650                       | Higher coverage             |
| SWE       | Medical Birth registry      | 2008                    | 4.4                           | 107960                       | Higher coverage             |
| SWE       | Medical Birth registry      | 2009                    | 4.2                           | 109330                       | Higher coverage             |
| SWE       | Medical Birth registry      | 2010                    | 4.2                           | 114730                       | Higher coverage             |
| SWE       | Medical Birth registry      | 2011                    | 4.2                           | 110900                       | Higher coverage             |

| ISO3 code | Data source                                             | Year of data collection | Reported low birthweight rate | Number of weighed livebirths | National representativeness |
|-----------|---------------------------------------------------------|-------------------------|-------------------------------|------------------------------|-----------------------------|
| SWE       | Medical Birth registry                                  | 2012                    | 4.0                           | 111850                       | Higher coverage             |
| SWE       | Medical Birth registry                                  | 2013                    | 3.0                           | 109360                       | Higher coverage             |
| SWE       | Medical Birth registry                                  | 2014                    | 3.1                           | 111780                       | Higher coverage             |
| SYC       | National Statistical Office                             | 2000                    | 8.7                           | 1530                         | Higher coverage             |
| SYC       | National Statistical Office                             | 2001                    | 10.3                          | 1450                         | Higher coverage             |
| SYC       | National Statistical Office                             | 2002                    | 9.2                           | 1500                         | Higher coverage             |
| SYC       | National Statistical Office                             | 2003                    | 10.4                          | 1500                         | Higher coverage             |
| SYC       | National Statistical Office                             | 2004                    | 8.9                           | 1460                         | Moderate coverage           |
| SYC       | National Statistical Office                             | 2005                    | 10.1                          | 1550                         | Higher coverage             |
| SYC       | National Statistical Office                             | 2006                    | 12.0                          | 1480                         | Moderate coverage           |
| SYC       | National Statistical Office                             | 2007                    | 9.9                           | 1530                         | Moderate coverage           |
| SYC       | National Statistical Office                             | 2008                    | 11.5                          | 1550                         | Higher coverage             |
| SYC       | National Statistical Office                             | 2009                    | 10.9                          | 1590                         | Higher coverage             |
| SYC       | National Statistical Office                             | 2010                    | 10.8                          | 1500                         | Moderate coverage           |
| SYC       | National Statistical Office                             | 2011                    | 8.9                           | 1660                         | Higher coverage             |
| SYC       | National Statistical Office                             | 2012                    | 12.4                          | 1670                         | Higher coverage             |
| SYC       | National Statistical Office                             | 2013                    | 11.1                          | 1680                         | Higher coverage             |
| THA       | National Statistical Office                             | 2001                    | 12.9                          | 790430                       | Moderate coverage           |
| THA       | National Statistical Office                             | 2002                    | 12.5                          | 782920                       | Moderate coverage           |
| THA       | National Statistical Office                             | 2003                    | 12.1                          | 742190                       | Moderate coverage           |
| THA       | National Statistical Office                             | 2004                    | 11.3                          | 813070                       | Higher coverage             |
| THA       | National Statistical Office                             | 2005                    | 11.1                          | 809490                       | Higher coverage             |
| THA       | National Statistical Office                             | 2006                    | 11.4                          | 793630                       | Higher coverage             |
| THA       | National Statistical Office                             | 2007                    | 11.0                          | 797590                       | Higher coverage             |
| THA       | National Statistical Office                             | 2008                    | 10.8                          | 784260                       | Higher coverage             |
| THA       | National Statistical Office                             | 2009                    | 11.4                          | 765050                       | Higher coverage             |
| THA       | National Statistical Office                             | 2010                    | 11.3                          | 761690                       | Higher coverage             |
| THA       | Ministry of Interior & MICS4                            | 2011                    | 10.4                          | NA                           | Higher coverage             |
| THA       | Health Information Unit, Strategy and Planning Division | 2012                    | 10.2                          | 780980                       | Higher coverage             |
| THA       | Health Information Unit, Strategy and Planning Division | 2013                    | 10.9                          | 748090                       | Higher coverage             |
| THA       | Health Information Unit, Strategy and Planning Division | 2014                    | 10.6                          | 711810                       | Higher coverage             |
| THA       | Health Information Unit, Strategy and Planning Division | 2015                    | 10.6                          | 679510                       | Higher coverage             |
| TJK       | National Statistical Office                             | 2000                    | 3.9                           | 167250                       | Moderate coverage           |
| TJK       | National Statistical Office                             | 2001                    | 3.5                           | 171630                       | Higher coverage             |
| TJK       | National Statistical Office                             | 2002                    | 3.6                           | 175600                       | Higher coverage             |
| TJK       | National Statistical Office                             | 2003                    | 3.1                           | 177940                       | Higher coverage             |
| TJK       | National Statistical Office                             | 2004                    | 3.3                           | 179570                       | Higher coverage             |
| TJK       | National Statistical Office                             | 2005                    | 3.7                           | 180790                       | Higher coverage             |

| ISO3 code | Data source                                             | Year of data collection | Reported low birthweight rate | Number of weighed livebirths | National representativeness |
|-----------|---------------------------------------------------------|-------------------------|-------------------------------|------------------------------|-----------------------------|
| TJK       | National Statistical Office                             | 2006                    | 3.6                           | 186470                       | Higher coverage             |
| TJK       | National Statistical Office                             | 2007                    | 3.8                           | 200010                       | Higher coverage             |
| TJK       | National Statistical Office                             | 2008                    | 4.3                           | 203340                       | Higher coverage             |
| TJK       | National Statistical Office                             | 2009                    | 4.9                           | 199830                       | Moderate coverage           |
| TJK       | National Statistical Office                             | 2010                    | 4.8                           | 239810                       | Higher coverage             |
| TJK       | National Statistical Office                             | 2011                    | 5.1                           | 224180                       | Higher coverage             |
| TJK       | National Statistical Office                             | 2012                    | 5.6                           | 219290                       | Higher coverage             |
| TJK       | National Statistical Office                             | 2013                    | 5.9                           | 209420                       | Moderate coverage           |
| TJK       | National Statistical Office                             | 2014                    | 7.2                           | 229460                       | Higher coverage             |
| TKM       | National Statistical Office                             | 2002                    | 3.2                           | NA                           | Moderate coverage           |
| TKM       | National Statistical Office                             | 2003                    | 3.9                           | NA                           | Moderate coverage           |
| TKM       | National Statistical Office                             | 2004                    | 3.5                           | NA                           | Moderate coverage           |
| TKM       | National Statistical Office                             | 2005                    | 3.7                           | NA                           | Moderate coverage           |
| TKM       | National Statistical Office                             | 2006                    | 3.8                           | NA                           | Moderate coverage           |
| TKM       | National Statistical Office                             | 2007                    | 5.0                           | NA                           | Moderate coverage           |
| TKM       | National Statistical Office                             | 2008                    | 5.0                           | NA                           | Moderate coverage           |
| TKM       | National Statistical Office                             | 2009                    | 4.9                           | NA                           | Moderate coverage           |
| TKM       | National Statistical Office                             | 2010                    | 4.6                           | NA                           | Moderate coverage           |
| TKM       | Ministry of Health and Medical Industry of Turkmenistan | 2011                    | 4.6                           | NA                           | Moderate coverage           |
| TKM       | Ministry of Health and Medical Industry of Turkmenistan | 2012                    | 4.9                           | NA                           | Moderate coverage           |
| TKM       | Ministry of Health and Medical Industry of Turkmenistan | 2013                    | 4.9                           | NA                           | Moderate coverage           |
| TKM       | Ministry of Health and Medical Industry of Turkmenistan | 2014                    | 5.0                           | NA                           | Moderate coverage           |
| TKM       | Ministry of Health and Medical Industry of Turkmenistan | 2015                    | 4.8                           | NA                           | Moderate coverage           |
| TTO       | National Statistical Office                             | 2006                    | 8.6                           | 16010                        | Moderate coverage           |
| TTO       | National Statistical Office                             | 2008                    | 10.2                          | 16830                        | Moderate coverage           |
| TTO       | National Statistical Office                             | 2009                    | 10.3                          | 16500                        | Moderate coverage           |
| TTO       | National Statistical Office                             | 2013                    | 11.6                          | 15940                        | Moderate coverage           |
| TUR       | Ministry of Health                                      | 2012                    | 8.8                           | 1265550                      | Higher coverage             |
| TUR       | National Statistical Office                             | 2013                    | 8.4                           | 1271250                      | Higher coverage             |
| TUR       | Ministry of Health                                      | 2014                    | 8.6                           | 1318690                      | Higher coverage             |
| TUR       | Ministry of Health                                      | 2015                    | 8.6                           | 1301540                      | Higher coverage             |
| UKR       | National Statistical Office                             | 2000                    | 5.4                           | NA                           | Higher coverage             |
| UKR       | National Statistical Office                             | 2001                    | 5.3                           | NA                           | Higher coverage             |
| UKR       | National Statistical Office                             | 2002                    | 5.2                           | NA                           | Higher coverage             |
| UKR       | National Statistical Office                             | 2003                    | 5.4                           | NA                           | Higher coverage             |
| UKR       | National Statistical Office                             | 2004                    | 5.1                           | NA                           | Higher coverage             |
| UKR       | National Statistical Office                             | 2005                    | 5.1                           | NA                           | Higher coverage             |

| ISO3 code | Data source                 | Year of data collection | Reported low birthweight rate | Number of weighed livebirths | National representativeness |
|-----------|-----------------------------|-------------------------|-------------------------------|------------------------------|-----------------------------|
| UKR       | National Statistical Office | 2006                    | 5.1                           | NA                           | Higher coverage             |
| UKR       | National Statistical Office | 2007                    | 5.1                           | NA                           | Higher coverage             |
| UKR       | National Statistical Office | 2008                    | 5.1                           | NA                           | Higher coverage             |
| UKR       | National Statistical Office | 2009                    | 5.2                           | NA                           | Higher coverage             |
| UKR       | National Statistical Office | 2010                    | 5.3                           | NA                           | Higher coverage             |
| UKR       | National Statistical Office | 2011                    | 5.3                           | NA                           | Higher coverage             |
| UKR       | National Statistical Office | 2012                    | 5.3                           | NA                           | Higher coverage             |
| UKR       | National Statistical Office | 2013                    | 5.4                           | NA                           | Higher coverage             |
| URY       | National Statistical Office | 2000                    | 7.6                           | NA                           | Higher coverage             |
| URY       | National Statistical Office | 2001                    | 8.2                           | NA                           | Higher coverage             |
| URY       | National Statistical Office | 2002                    | 8.1                           | NA                           | Higher coverage             |
| URY       | National Statistical Office | 2003                    | 9.1                           | NA                           | Higher coverage             |
| URY       | National Statistical Office | 2004                    | 8.7                           | NA                           | Higher coverage             |
| URY       | National Statistical Office | 2005                    | 8.7                           | NA                           | Higher coverage             |
| URY       | National Statistical Office | 2006                    | 8.5                           | NA                           | Higher coverage             |
| URY       | National Statistical Office | 2007                    | 8.4                           | NA                           | Higher coverage             |
| URY       | National Statistical Office | 2008                    | 8.4                           | NA                           | Higher coverage             |
| URY       | National Statistical Office | 2009                    | 8.4                           | NA                           | Higher coverage             |
| URY       | National Statistical Office | 2010                    | 8.3                           | NA                           | Higher coverage             |
| URY       | National Statistical Office | 2011                    | 8.3                           | NA                           | Higher coverage             |
| URY       | National Statistical Office | 2012                    | 8.1                           | NA                           | Higher coverage             |
| URY       | National Statistical Office | 2013                    | 7.6                           | NA                           | Higher coverage             |
| URY       | National Statistical Office | 2014                    | 7.5                           | NA                           | Higher coverage             |
| URY       | National Statistical Office | 2015                    | 7.7                           | NA                           | Higher coverage             |
| USA       | National Statistical Office | 2000                    | 7.6                           | NA                           | Higher coverage             |
| USA       | National Statistical Office | 2001                    | 7.7                           | NA                           | Higher coverage             |
| USA       | National Statistical Office | 2002                    | 7.8                           | NA                           | Higher coverage             |
| USA       | National Statistical Office | 2003                    | 7.9                           | NA                           | Higher coverage             |
| USA       | National Statistical Office | 2004                    | 8.1                           | NA                           | Higher coverage             |
| USA       | National Statistical Office | 2005                    | 8.2                           | NA                           | Higher coverage             |
| USA       | National Statistical Office | 2006                    | 8.3                           | NA                           | Higher coverage             |
| USA       | National Statistical Office | 2007                    | 8.2                           | NA                           | Higher coverage             |
| USA       | National Statistical Office | 2008                    | 8.2                           | NA                           | Higher coverage             |
| USA       | National Statistical Office | 2009                    | 8.2                           | NA                           | Higher coverage             |
| USA       | National Statistical Office | 2010                    | 8.1                           | NA                           | Higher coverage             |
| USA       | National Statistical Office | 2011                    | 8.1                           | NA                           | Higher coverage             |
| USA       | National Statistical Office | 2012                    | 8.0                           | NA                           | Higher coverage             |
| USA       | National Statistical Office | 2013                    | 8.0                           | NA                           | Higher coverage             |
| USA       | National Statistical Office | 2014                    | 8.0                           | NA                           | Higher coverage             |
| USA       | National Statistical Office | 2015                    | 8.1                           | NA                           | Higher coverage             |
| UZB       | National Statistical Office | 2000                    | 4.7                           | NA                           | Moderate coverage           |

| ISO3 code | Data source                 | Year of data collection | Reported low birthweight rate | Number of weighed livebirths | National representativeness |
|-----------|-----------------------------|-------------------------|-------------------------------|------------------------------|-----------------------------|
| UZB       | National Statistical Office | 2001                    | 4.6                           | NA                           | Moderate coverage           |
| UZB       | National Statistical Office | 2002                    | 4.6                           | NA                           | Moderate coverage           |
| UZB       | National Statistical Office | 2003                    | 4.8                           | NA                           | Moderate coverage           |
| UZB       | National Statistical Office | 2004                    | 4.8                           | NA                           | Moderate coverage           |
| UZB       | National Statistical Office | 2005                    | 4.5                           | NA                           | Moderate coverage           |
| UZB       | National Statistical Office | 2006                    | 4.3                           | NA                           | Moderate coverage           |
| UZB       | National Statistical Office | 2007                    | 4.7                           | NA                           | Moderate coverage           |
| UZB       | National Statistical Office | 2008                    | 4.4                           | NA                           | Moderate coverage           |
| UZB       | National Statistical Office | 2009                    | 4.7                           | NA                           | Moderate coverage           |
| UZB       | National Statistical Office | 2010                    | 4.9                           | NA                           | Moderate coverage           |
| UZB       | National Statistical Office | 2011                    | 5.1                           | NA                           | Moderate coverage           |
| UZB       | National Statistical Office | 2012                    | 4.6                           | NA                           | Moderate coverage           |
| UZB       | National Statistical Office | 2013                    | 4.3                           | NA                           | Moderate coverage           |
| UZB       | National Statistical Office | 2014                    | 3.9                           | NA                           | Moderate coverage           |
| VEN       | National Statistical Office | 2000                    | 8.8                           | NA                           | Higher coverage             |
| VEN       | National Statistical Office | 2001                    | 8.7                           | NA                           | Higher coverage             |
| VEN       | National Statistical Office | 2002                    | 8.5                           | NA                           | Higher coverage             |
| VEN       | National Statistical Office | 2003                    | 8.7                           | NA                           | Higher coverage             |
| VEN       | National Statistical Office | 2004                    | 8.8                           | NA                           | Higher coverage             |
| VEN       | National Statistical Office | 2005                    | 9.0                           | NA                           | Higher coverage             |
| VEN       | National Statistical Office | 2006                    | 9.0                           | NA                           | Higher coverage             |
| VEN       | National Statistical Office | 2007                    | 8.9                           | NA                           | Higher coverage             |
| VEN       | National Statistical Office | 2008                    | 8.2                           | NA                           | Higher coverage             |
| VEN       | National Statistical Office | 2009                    | 8.2                           | NA                           | Higher coverage             |
| VEN       | National Statistical Office | 2010                    | 8.4                           | NA                           | Higher coverage             |
| VEN       | National Statistical Office | 2011                    | 8.7                           | NA                           | Higher coverage             |
| VEN       | National Statistical Office | 2012                    | 8.5                           | NA                           | Higher coverage             |
| VEN       | National Statistical Office | 2013                    | 8.7                           | NA                           | Higher coverage             |
| VEN       | National Statistical Office | 2014                    | 9.0                           | NA                           | Higher coverage             |
| VEN       | National Statistical Office | 2015                    | 9.0                           | NA                           | Higher coverage             |
| ZAF       | HMIS                        | 2005                    | 10.5                          | 940060                       | Moderate coverage           |
| ZAF       | HMIS                        | 2006                    | 11.8                          | 940060                       | Moderate coverage           |
| ZAF       | HMIS                        | 2007                    | 11.7                          | 940060                       | Moderate coverage           |
| ZAF       | HMIS                        | 2008                    | 11.8                          | 940060                       | Moderate coverage           |
| ZAF       | HMIS                        | 2009                    | 12.3                          | 940060                       | Moderate coverage           |
| ZAF       | HMIS                        | 2010                    | 12.7                          | 940060                       | Moderate coverage           |
| ZAF       | HMIS                        | 2011                    | 13.2                          | 940060                       | Moderate coverage           |
| ZAF       | HMIS                        | 2012                    | 13.5                          | 940060                       | Moderate coverage           |
| ZAF       | HMIS                        | 2014                    | 12.6                          | 958260                       | Moderate coverage           |

NA=Not available. For datapoints with missing data on number of babies weighed assumed: (1) For High Income Countries; assumed higher coverage (2) For countries with higher coverage time series with missing data for some years; assumed

higher coverage. (3) For countries with high facility birth from TRANSMONEE database (TKM, UZB); assumed moderate coverage

Figure 4.1: Summary of regional low birthweight rate data inputs meeting inclusion criteria

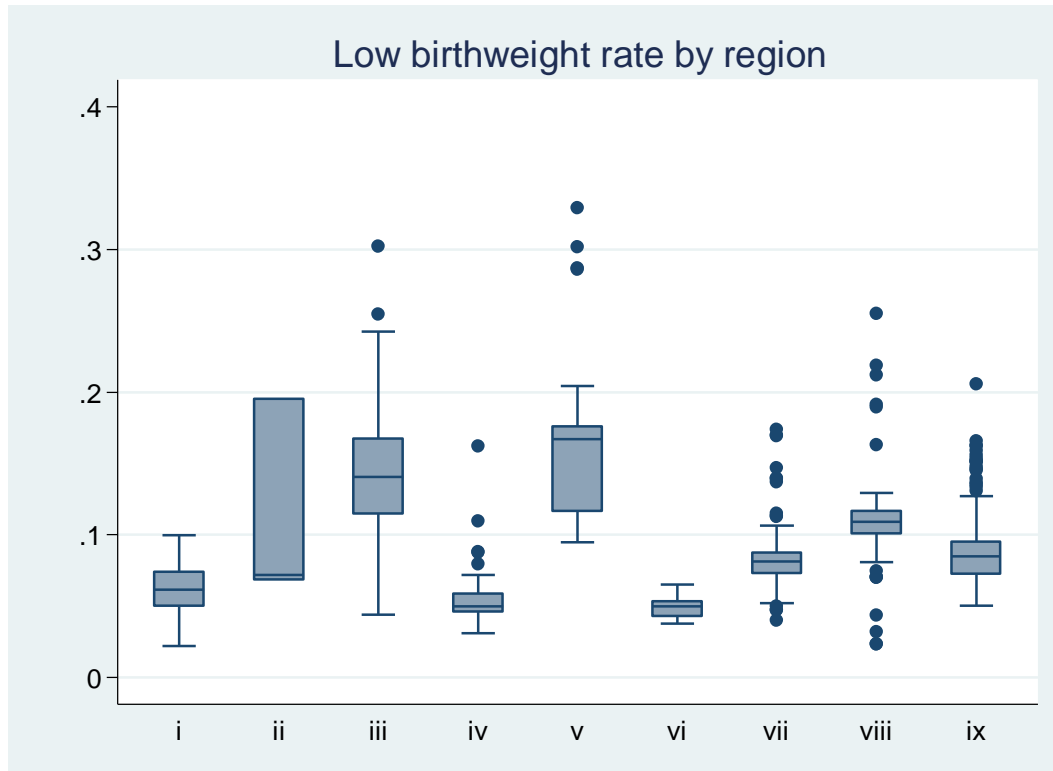

| Region | Constituting regions                             | Number data points | % of input database |
|--------|--------------------------------------------------|--------------------|---------------------|
| i      | North America, Europe, Australia and New Zealand | 696                | 48.1                |
| ii     | Northern Africa                                  | 3                  | 0.2                 |
| iii    | Southern/East/West Africa                        | 158                | 10.9                |
| iv     | Central Asia                                     | 85                 | 5.9                 |
| v      | Southern Asia                                    | 30                 | 2.1                 |
| vi     | Eastern Asia                                     | 22                 | 1.5                 |
| vii    | Western Asia                                     | 143                | 9.9                 |
| viii   | South Eastern Asia and Oceania <sup>1</sup>      | 72                 | 5.0                 |
| ix     | Latin America and Caribbean                      | 238                | 16.5                |

<sup>1</sup>without Australia and New Zealand

Table 4.3: Summary of datapoints included by World Bank income region:

| Income group        | Number of countries | Number of countries with data | % of countries with no data | Mean number datapoints for countries with data | Mean number of datapoints per country overall | Number of livebirths in 2015 | % of global livebirths in 2015 |
|---------------------|---------------------|-------------------------------|-----------------------------|------------------------------------------------|-----------------------------------------------|------------------------------|--------------------------------|
| High income         | 56                  | 51                            | 8.9                         | 14                                             | 13                                            | 12,665,700                   | 9.0%                           |
| Upper middle income | 55                  | 43                            | 21.8                        | 11                                             | 8                                             | 37,067,400                   | 26.4%                          |
| Lower middle income | 51                  | 35                            | 31.4                        | 6                                              | 4                                             | 67,634,500                   | 48.1%                          |
| Low income          | 31                  | 18                            | 41.9                        | 4                                              | 2                                             | 23,186,200                   | 16.5%                          |

\* Cook Islands is not included in the above table as it is not classified in the World Bank income regions.

## Quality categorisation of administrative data

To seek to categorise the quality of available national level routine data: first we reviewed previously used quality criteria from other maternal and perinatal global estimation exercises, and secondly further criteria suggested by the expert group that were plausibly associated with the strength of low birthweight reporting were added (see Table 4.3). All of the identified potential methods had limitations, either in the proximity of the indicator to birthweight reporting, or in the feasibility of collecting the data. Of the identified potential low birthweight administrative data quality criteria, only population representativeness was assessed to be currently feasible.

Table 4.3: Summary of previously used and proposed quality criteria for the assessment of National Routine Data in global estimation exercises.

| Method                                                                  | Components                                                                                                                                                                                                                                                                                                                                                                                                                                          | Potential benefits                                                                                                                                                                | Potential limitations                                                                                                                                 |
|-------------------------------------------------------------------------|-----------------------------------------------------------------------------------------------------------------------------------------------------------------------------------------------------------------------------------------------------------------------------------------------------------------------------------------------------------------------------------------------------------------------------------------------------|-----------------------------------------------------------------------------------------------------------------------------------------------------------------------------------|-------------------------------------------------------------------------------------------------------------------------------------------------------|
| Vital Statistics Performance Index (VSPI) <sup>2</sup>                  | VSPI uses mortality data as proxy for quality & utility of CRVS. Six components: <ul style="list-style-type: none"> <li>• Completeness of death reporting</li> <li>• Quality of death reporting</li> <li>• Level of cause-specific detail</li> <li>• Internal consistency</li> <li>• Quality of age &amp; sex reporting</li> <li>• Data availability or timeliness</li> </ul> High VSPI (70-100): 69 countries<br>Medium VSPI (50-69): 17 countries | Published and used classification, developed with robust methodology                                                                                                              | Only relates to CRVS strength for death reporting, distal to birthweight on birth certificate<br><br>Could be used in conjunction with another method |
| Maternal death reporting quality criteria (2015 estimates) <sup>3</sup> | CRVS system operational for more than 20 years (earliest data from before 1996), and reporting data after 2007<br>Low rate of ill-defined causes of maternal mortality (<0.2)                                                                                                                                                                                                                                                                       | Used in published literature for maternal death estimates<br>Outcome (maternal death) occurring around the time of birth, so may be more linked than all-age CRVS death reporting | Less robust methodology in its development<br>Death reporting, therefore distal to birthweight on birth certificate                                   |
| Stillbirth estimates (2015) <sup>4</sup>                                | Composite measure of: <i>CRVS strength</i> :<br>VR is considered 'good quality' for the purposes of maternal death reporting                                                                                                                                                                                                                                                                                                                        | Used in published literature for stillbirth estimates<br>Outcome (stillbirth) occurring around the time of birth,                                                                 | Less robust methodology in its development<br>Death reporting, therefore distal to birthweight on birth certificate                                   |



|                                                                 |                                                                                                                                                                                                                                                                                                                                                                                                                                         |                                                                                                                                                        |                                                                                                                                                                                                                                     |
|-----------------------------------------------------------------|-----------------------------------------------------------------------------------------------------------------------------------------------------------------------------------------------------------------------------------------------------------------------------------------------------------------------------------------------------------------------------------------------------------------------------------------|--------------------------------------------------------------------------------------------------------------------------------------------------------|-------------------------------------------------------------------------------------------------------------------------------------------------------------------------------------------------------------------------------------|
|                                                                 | <p>For given year female child mortality capture &gt;85%</p> <p><i>CRVS capture of perinatal events:</i></p> <p>Stillbirth rate (adjusted to 28 week definition): national UN-IGME NMR ratio &gt;0.5 for all years</p> <p><i>Completeness of data:</i></p> <p>Earliest year of data available is before 2005</p> <p>Latest year of data available is after 2010.</p> <p>Number of years of data &gt;0.5 *(max year – min year + 1).</p> | <p>so may be more linked than all-age CRVS death reporting</p> <p>Uses a composite measure that seeks to capture several dimensions of the quality</p> |                                                                                                                                                                                                                                     |
| Proposed potential quality criteria specific to low birthweight |                                                                                                                                                                                                                                                                                                                                                                                                                                         |                                                                                                                                                        |                                                                                                                                                                                                                                     |
| Availability of LBW sub-envelop data                            | Are data presented by LBW sub-group                                                                                                                                                                                                                                                                                                                                                                                                     | Can be more critically reviewed, e.g. are they missing most of the extremely preterm babies (<1000g)                                                   | Data may be available for a country – but not included in the reporting statistics collected.                                                                                                                                       |
| Coverage of birth certificate                                   | Coverage of birth certificate                                                                                                                                                                                                                                                                                                                                                                                                           | Proximal to birthweight collection (on certificate)<br>If no birth certificate, will not have been able to collect birthweight information from it     | Data not available on birth certificate around time of birth. Many initiatives to increase birth certificate coverage use immunisations or catch up later in childhood – so high coverage, does not equate to good birthweight data |
| Population representativeness                                   | Proportion of estimated total livebirths in the country in the given year covered by the reporting system                                                                                                                                                                                                                                                                                                                               | Proximal to outcome                                                                                                                                    | Acceptable levels of population representativeness need defining                                                                                                                                                                    |
| Facility birth rate                                             | Proportion of all births in a country that are in facilities                                                                                                                                                                                                                                                                                                                                                                            | Birthweight is less likely to be recorded for births outside a facility                                                                                | Facility birth is not a guarantee of birthweight being measured or recorded, and the population representativeness above provides a closer measure of the outcome – however may be useful for                                       |

|                                                              |                                                           |                     |                                                                                                                                |
|--------------------------------------------------------------|-----------------------------------------------------------|---------------------|--------------------------------------------------------------------------------------------------------------------------------|
|                                                              |                                                           |                     | excluding countries with low coverage of birthweight data                                                                      |
| Completeness of birthweight reporting within the data system | % of all births captured in the system with a birthweight | Proximal to outcome | In general, very low levels of missing birthweight in data systems reporting this. % missing is absent from many data sources. |

Table 4.4: Countries with higher quality national routine data (N=57)

|                   |            |                    |                |
|-------------------|------------|--------------------|----------------|
| Argentina         | Cuba       | Luxembourg         | Slovenia       |
| Armenia           | Czechia    | Malaysia           | Spain          |
| Australia         | Denmark    | Malta              | Sri Lanka      |
| Austria           | Estonia    | Mauritius          | Sweden         |
| Azerbaijan        | Finland    | Montenegro         | Switzerland    |
| Bahrain           | Georgia    | Netherlands        | Thailand       |
| Belarus           | Germany    | New Zealand        | Macedonia      |
| Belgium           | Hungary    | Norway             | Ukraine        |
| Brazil            | Iceland    | Poland             | United Kingdom |
| Brunei Darussalam | Ireland    | Portugal           | USA            |
| Bulgaria          | Israel     | Qatar              | Uruguay        |
| Canada            | Japan      | Republic of Korea  | Venezuela      |
| Chile             | Kazakhstan | Russian Federation |                |
| Costa Rica        | Kyrgyzstan | Seychelles         |                |
| Croatia           | Latvia     | Slovakia           |                |

Table 4.5: Summary of input data by data type

| Data type                               | Number of data inputs | Mean | Low birthweight rate |         |         |
|-----------------------------------------|-----------------------|------|----------------------|---------|---------|
|                                         |                       |      | Standard Deviation   | Minimum | Maximum |
| <b>Overall</b>                          | 1447                  | 8.1  | 3.9                  | 2.2     | 32.9    |
| <b>High quality admin data</b>          | 1026                  | 7.1  | 2.5                  | 2.2     | 17.6    |
| <b>Moderate quality admin data</b>      | 192                   | 7.9  | 3.1                  | 2.4     | 15.7    |
| <b>Nationally representative survey</b> | 229                   | 12.9 | 5.6                  | 3.1     | 32.9    |

## 5. Predictor variables

### Identification of predictor variables for model input

A scoping literature review was conducted to identify covariates which were associated with LBW rates (not necessarily determinants of LBW) at a population level. These included distal determinants such as geographical and socio-economic factors, interacting and overlapping demographic and biomedical factors, associated perinatal outcome markers and access to health care. Out of these covariates the ones for which complete time-series data was available for the period we are predicting for (2000-2015) were included in the modelling process and are listed in Table 5.1 with the respective sources they were obtained from.

Table 5.1: Source of potential predictor variables tested in models

| Predictor                                                | Source                                                                                                                                                                                                                                       |
|----------------------------------------------------------|----------------------------------------------------------------------------------------------------------------------------------------------------------------------------------------------------------------------------------------------|
| Gross National Income (GINI)                             | World Bank <a href="http://data.worldbank.org/indicator">http://data.worldbank.org/indicator</a>                                                                                                                                             |
| GINI coefficient                                         | World Bank <a href="http://data.worldbank.org/indicator">http://data.worldbank.org/indicator</a>                                                                                                                                             |
| % of the population that are urban                       | UNPD World Urbanization Prospects 2014<br><a href="https://esa.un.org/unpd/wup/publications/files/wup2014-highlights.pdf">https://esa.un.org/unpd/wup/publications/files/wup2014-highlights.pdf</a>                                          |
| Mean adult female education (years)                      | UNESCO Institute for Statistics and HDRO estimates based on data on education attainment from UNESCO Institute for Statistics ( <a href="http://uis.unesco.org/">http://uis.unesco.org/</a> ) and on methodology from Barro-Lee <sup>5</sup> |
| Human Development Index (HDI)                            | UNDP Human Development Report 2014<br><a href="http://hdr.undp.org/sites/default/files/hdr14-report-en-1.pdf">http://hdr.undp.org/sites/default/files/hdr14-report-en-1.pdf</a>                                                              |
| Stunting in children under 5 years                       | Prevalence HAZ <-2 from Stevens et al <sup>6</sup>                                                                                                                                                                                           |
| Underweight in children under 5 years                    | Prevalence WAZ <-2 from Stevens et al <sup>6</sup>                                                                                                                                                                                           |
| Neonatal Mortality Rate (NMR)                            | UN-IGME 2015 available from <a href="http://www.childmortality.org/">http://www.childmortality.org/</a>                                                                                                                                      |
| Adult Female Underweight (age-standardised) <sup>1</sup> | NCD Risk Factor Collaboration (NCD-RisC)<br><a href="http://ncdrisc.org/">http://ncdrisc.org/</a>                                                                                                                                            |
| Adult Female Overweight (age-standardised) <sup>1</sup>  | NCD Risk Factor Collaboration (NCD-RisC)<br><a href="http://ncdrisc.org/">http://ncdrisc.org/</a>                                                                                                                                            |
| Adult Female Obesity (age-standardised) <sup>1</sup>     | NCD Risk Factor Collaboration (NCD-RisC)<br><a href="http://ncdrisc.org/">http://ncdrisc.org/</a>                                                                                                                                            |
| General Fertility Rate (GFR)                             | UNPD                                                                                                                                                                                                                                         |
| Plasmodium falciparum parasite rate                      | Malaria Atlas Project <a href="http://www.map.ox.ac.uk/">http://www.map.ox.ac.uk/</a> (Oxford Cube)                                                                                                                                          |
| % pregnant women attending 4 antenatal care visits (ANC) | UNICEF database <a href="http://data.unicef.org/#">http://data.unicef.org/#</a>                                                                                                                                                              |
| Adolescent fertility rate                                | World Bank <a href="http://data.worldbank.org/indicator">http://data.worldbank.org/indicator</a>                                                                                                                                             |
| Modern contraceptive rate prevalence                     | United Nations Department of Economic and Social Affairs (UNDESA)<br><a href="https://www.un.org/development/desa/en/">https://www.un.org/development/desa/en/</a>                                                                           |
| Adult Female Smoking rate                                | Institute of Health Metrics and Evaluation (IHME) <a href="http://ghdx.healthdata.org/ihme_data">http://ghdx.healthdata.org/ihme_data</a>                                                                                                    |
| Geographical Region (based on UN region)                 | United Nations Statistics Division <a href="http://unstats.un.org/unsd/methods/m49/m49regin.htm">http://unstats.un.org/unsd/methods/m49/m49regin.htm</a>                                                                                     |

<sup>1</sup>Excluded as a covariate in the final model fitting process due to its non-linear association with low birthweight.

## 6. Model selection and estimation

All identified predictor variables with full time series were included in the initial model. For continuous variables, a univariate analysis was undertaken to identify whether the relationship between the log low birthweight (ln\_lbw) and the predictor was best described using a ln transformation, or using the non-transformed predictor. For all variables the BIC was calculated. Predictors were retained when the direction of the coefficient was plausible. All covariates were retained at this stage as the direction of all the coefficients were plausible. Correlation between predictors was assessed using Variance Inflation Factor (VIF). Predictors with a VIF of >10 were dropped. Predictors were retained when the direction of the coefficient was biologically plausible.

We sought to maximise the predicting power of the model, whilst reducing the noise within the model from a large number of predictors. We removed one predictor at a time from the model, commencing with the predictor with the largest BIC on univariate analysis, and re-fitted the model. If the model was improved by removing this predictor (lower BIC compared to the model containing the predictor), the predictor was dropped from the model. If the BIC was higher, the predictor was retained. The p.falciparum parasite, female smoking, gini index, modern contraception, general fertility rate, GNI, % urban, Maternal education, antenatal care coverage, adolescent fertility rate and female underweight skilled birth attendant, were dropped as a result of this process. Once this had been completed the final step was to check if the direction of the model coefficient for all the remaining predictors was plausible. See table 5.1.

Table 6.1: Summary of model fitting process

|                                         | Effect of dropping predictor                    | Outcome                         | BIC              |
|-----------------------------------------|-------------------------------------------------|---------------------------------|------------------|
| Full Model                              |                                                 | -                               | -1491.9          |
| Dropping malaria                        | Improved BIC                                    | Dropped from model              | -1498.5          |
| Dropping smoking                        | Improved BIC                                    | Dropped from model              | -1500.1          |
| Dropping gini                           | Improved BIC                                    | Dropped from model              | -1504.5          |
| Dropping modern contraception           | Improved BIC                                    | Dropped from model              | -1510.5          |
| Dropping general fertility rate         | Improved BIC                                    | Dropped from model              | -1515.7          |
| Dropping gross national income          | Improved BIC                                    | Dropped from model              | -1519.9          |
| Dropping urban                          | Improved BIC                                    | Dropped from model              | -1525.9          |
| Dropping maternal education             | Improved BIC                                    | Dropped from model              | -1531.2          |
| Dropping ANC                            | Improved BIC                                    | Dropped from model              | -1538.5          |
| Dropping stunting                       | Worsened BIC                                    | Retained in model               | -1517.5          |
| Dropping adolescent fertility rate      | Improved BIC                                    | Dropped from model              | -1542.7          |
| Dropping region                         | Worsened BIC                                    | Retained in model               | -1523.2          |
| Dropping adult female underweight       | Improved BIC                                    | Dropped from model              | -1547.8          |
| Dropping underweight                    | Worsened BIC                                    | Retained in model               | -1529.9          |
| Dropping NMR                            | Worsened BIC                                    | Retained in model               | -1519.5          |
| Dropping context                        | Worsened BIC                                    | Retained in model               | -1448.4          |
| <b>Checking direction of covariates</b> | Stunting non-plausible direction of coefficient | Stunting dropped from the model |                  |
| <b>Final model</b>                      |                                                 |                                 | <b>-1531.039</b> |

<sup>1</sup> Context= data type variable – higher quality admin, lower quality admin, or nationally representative survey

The final model included ln low birthweight, neonatal mortality rate, child underweight, region (sub-Saharan Africa, Southern Asia or other) and a dummy variable for data type

### Final model equation

$$\text{Log}(\text{Low birthweight rate}_{ij}) = a + b(\text{NMR}_{ij}) + c(\text{child underweight}_{ij}) + d(\text{region}_{ij}) + e(\text{datatype}_{ij}) + u_j + e_{ij}$$

b() and c() represent functions each involving 2 parameters,

d() indicates a 3 parameter function associated with 3 dummy variables representing different aggregated regional grouping (south asia, sub-saharan Africa, other regions)

d() indicates a 3 parameter function associated with 3 dummy variables representing different data types (see paper for details)

$u_j$  represent country-specific random effects, assumed to be independent normally distributed with constant variance

$e_{ij}$  represent individual data point-level residuals, assumed to be independent normally distributed with constant variance

Figure 6.1: Diagnostic plots for the low birthweight prediction regression model

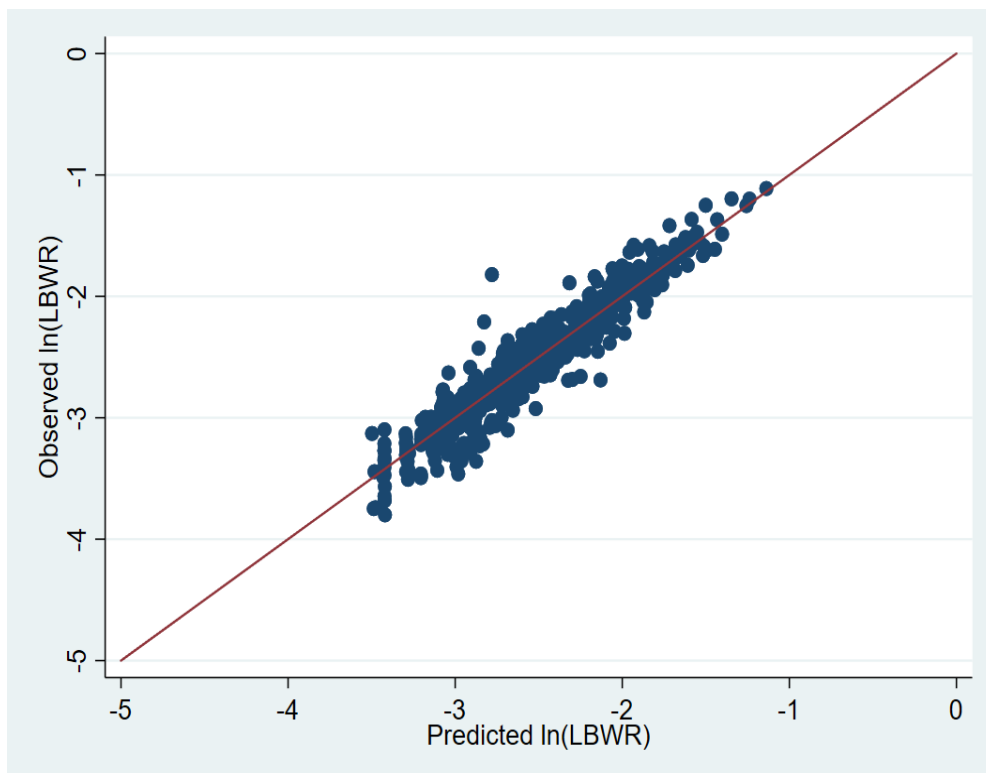

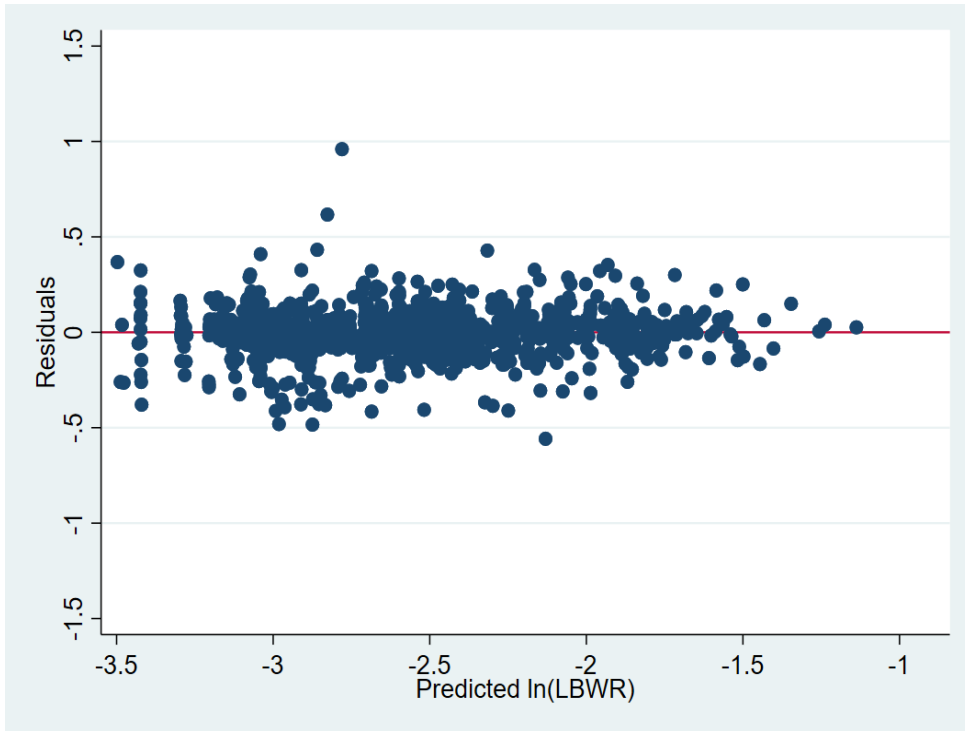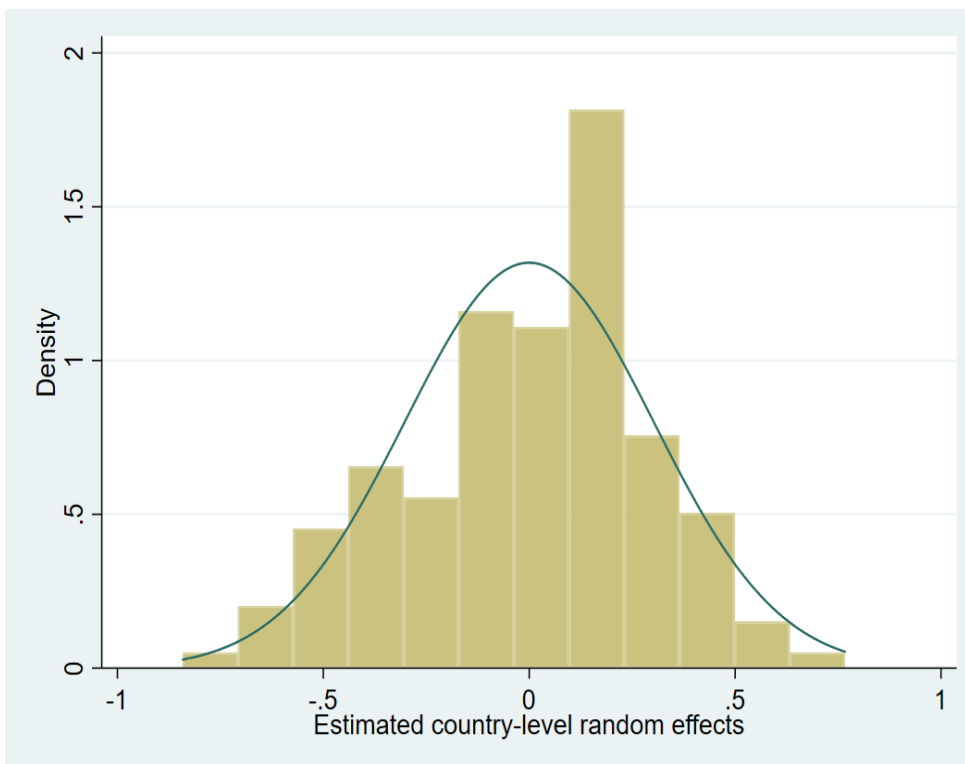

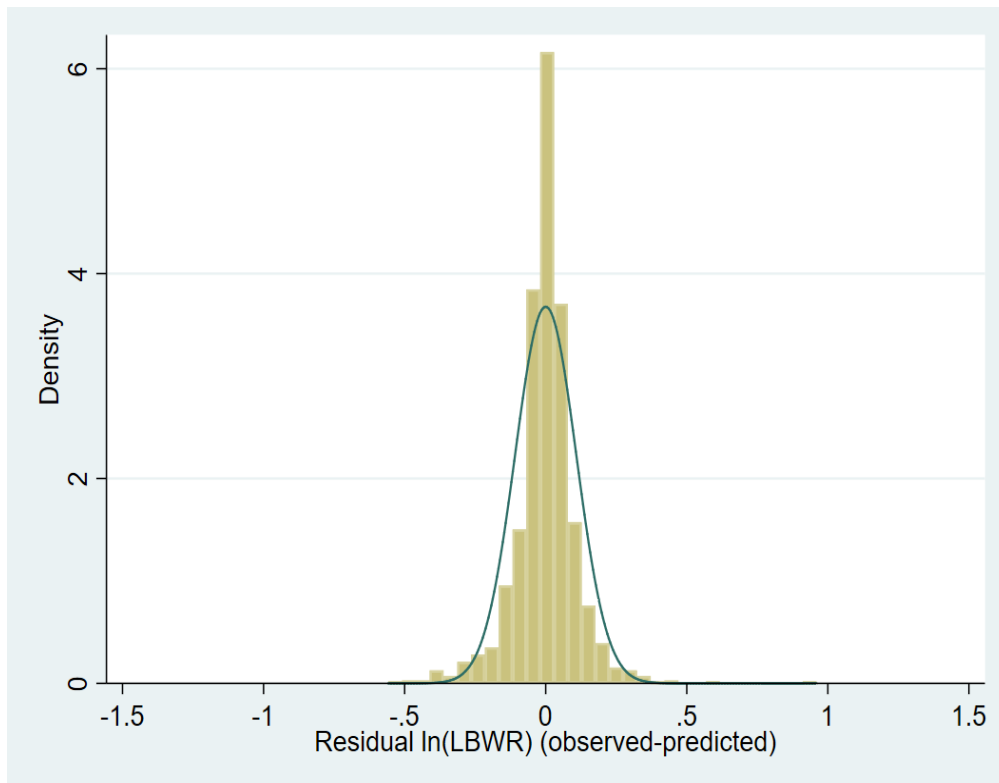

Table 6.2: Model coefficients

|                         |                                  | Coefficient<br>(95% Confidence Interval) |
|-------------------------|----------------------------------|------------------------------------------|
| Neonatal Mortality Rate |                                  | 0.009 (0.005 – 0.012)                    |
| Child underweight       |                                  | 0.615 (-0.031 – 1.26)                    |
| Region                  | Other regions                    | -                                        |
|                         | Sub-Saharan Africa               | 0.3 (0.169 – 0.432)                      |
|                         | Southern Asia                    | 0.635 (0.355 – 0.915)                    |
| Data type               | High quality admin data          | -                                        |
|                         | Moderate quality admin data      | -0.008 (-0.036 – 0.002)                  |
|                         | Nationally representative survey | 0.165 (0.132 – 0.198)                    |

Table 6.2 shows the estimated coefficients for the predictors retained in the final model. Each unit increase in NMR is associated with a 0.01-unit increase in the natural log LBW rate. Unit increases in prevalence of child underweight are associated with a 0.62-unit increase in natural log LBW rate. Little difference was observed between LBW rates from high and moderate quality administrative data sources. However, adjusted nationally representative household survey data LBW rates were systematically higher than administrative data sources. As expected, low birthweight rates for Southern Asia and sub-Saharan Africa were higher than those from other regions.

## Calculation of low birthweight numbers

Live birth estimates from the World Population Prospects: the 2017 revision<sup>7</sup> were used to convert the low birthweight rate to the number of low birthweights using the formula:

Number of low birthweights = (low birthweight rate\*number of livebirths)/100

## Uncertainty estimation

For countries with higher quality administrative data we used a bspline regression model to predict the standard error and calculate 95% confidence intervals for the country-level LBW estimates. Using the calculated standard errors and assuming a normal distribution, we randomly sampled 1000 times from the distribution to generate 1000 point estimates for LBW for each country with higher quality administrative data for each year.

For all other countries, estimates of uncertainty were generated by drawing 1000 bootstrap samples from the estimation dataset and using the parameter estimates obtained from each bootstrap sample to generate a new set of predictions including the estimate of the variance of the country-specific random effects. We used this estimate of the between country variance to draw, at random, a random effect for countries not included in the bootstrap sample assuming that the random effects are normally distributed with mean zero and variance equal to that estimated from the model.

To obtain worldwide and regional level estimates of uncertainty, we summed the 1000 LBW point estimates for each country for each year from the two approaches detailed above at worldwide or regional level and used the 2.5th and 97.5th centiles of the resulting distributions. Because about half of the modelled countries had a country-specific random effect generated at random for each bootstrap prediction, some of which were positive and others negative, the relative uncertainty at the regional and worldwide level tends to be less than that at the individual country level.

## Annual Average Rate of Reduction (AARR)

The Annual Average Rate of Reduction (AARR) is the average relative percent decrease per year in prevalence or rate and is given by

$$1 - \left( \frac{LBW_{r_1}}{LBW_{r_0}} \right)^{\frac{1}{t}}$$

where  $LBW_{r_1}$  is the end year LBW rate,  $LBW_{r_0}$  is the starting year LBW rate, and  $t$  is the number of years between start and end years of the relevant period.



## 7. Results

Table 7.1: Estimated low birthweight rate by country for 2000 and 2015 for 148 countries<sup>2</sup> with data

| Country                          | Low birthweight rate 2000 | Number of low birthweights 2000 | Low birthweight rate 2015 | Number of low birthweights 2015 | 2000-2015 ARR % | Source of estimate      |
|----------------------------------|---------------------------|---------------------------------|---------------------------|---------------------------------|-----------------|-------------------------|
| Albania                          | 4.9                       | 2482                            | 4.6                       | 1594                            | 0.4             | hierarchical regression |
| Algeria                          | 7.7                       | 47080                           | 7.3                       | 68846                           | 0.4             | hierarchical regression |
| Andorra                          | 7.5                       | 52                              | 7.4                       | 57                              | 0.1             | hierarchical regression |
| Angola                           | 18.0                      | 146719                          | 15.3                      | 180176                          | 1.1             | hierarchical regression |
| Antigua and Barbuda              | 9.4                       | 161                             | 9.1                       | 148                             | 0.3             | hierarchical regression |
| Argentina                        | 7.4                       | 53097                           | 7.3                       | 55369                           | 0.0             | b-spline regression     |
| Armenia                          | 8.2                       | 3228                            | 9.0                       | 3606                            | -0.6            | b-spline regression     |
| Australia                        | 6.3                       | 15575                           | 6.5                       | 20256                           | -0.2            | b-spline regression     |
| Austria                          | 6.4                       | 5117                            | 6.5                       | 5419                            | -0.2            | b-spline regression     |
| Azerbaijan                       | 6.5                       | 9185                            | 7.3                       | 12819                           | -0.7            | b-spline regression     |
| Bahamas                          | 13.4                      | 707                             | 13.1                      | 732                             | 0.1             | hierarchical regression |
| Bahrain                          | 8.5                       | 1257                            | 11.9                      | 2559                            | -2.3            | b-spline regression     |
| Bangladesh                       | 36.2                      | 1318013                         | 27.8                      | 864807                          | 1.7             | hierarchical regression |
| Belarus                          | 5.0                       | 4468                            | 5.1                       | 5790                            | 0.0             | b-spline regression     |
| Belgium                          | 7.2                       | 8196                            | 7.3                       | 9355                            | -0.1            | b-spline regression     |
| Belize                           | 9.0                       | 659                             | 8.6                       | 703                             | 0.3             | hierarchical regression |
| Benin                            | 18.7                      | 54612                           | 16.9                      | 66992                           | 0.7             | hierarchical regression |
| Bhutan                           | 13.8                      | 2215                            | 11.7                      | 1694                            | 1.1             | hierarchical regression |
| Bolivia (Plurinational State of) | 8.0                       | 20549                           | 7.2                       | 18256                           | 0.7             | hierarchical regression |
| Bosnia and Herzegovina           | 3.5                       | 1454                            | 3.4                       | 1104                            | 0.2             | hierarchical regression |
| Botswana                         | 16.3                      | 7762                            | 15.6                      | 8337                            | 0.3             | hierarchical regression |
| Brazil                           | 7.8                       | 276914                          | 8.4                       | 248646                          | -0.5            | b-spline regression     |
| Brunei Darussalam                | 10.3                      | 732                             | 10.8                      | 724                             | -0.3            | b-spline regression     |
| Bulgaria                         | 8.6                       | 5633                            | 9.6                       | 6397                            | -0.7            | b-spline regression     |
| Burkina Faso                     | 15.8                      | 85144                           | 13.1                      | 94015                           | 1.2             | hierarchical regression |
| Burundi                          | 17.4                      | 47609                           | 15.1                      | 66158                           | 0.9             | hierarchical regression |
| Cambodia                         | 15.4                      | 52387                           | 12.1                      | 44558                           | 1.6             | hierarchical regression |
| Cameroon                         | 13.1                      | 83123                           | 12.0                      | 100727                          | 0.6             | hierarchical regression |
| Canada                           | 5.5                       | 18358                           | 6.4                       | 24684                           | -1.0            | b-spline regression     |
| Central African Republic         | 15.4                      | 23172                           | 14.5                      | 24124                           | 0.4             | hierarchical regression |
| Chile                            | 5.2                       | 13570                           | 6.2                       | 14910                           | -1.2            | b-spline regression     |
| China                            | 5.8                       | 940617                          | 5.0                       | 846892                          | 1.0             | hierarchical regression |
| Cote D'Ivoire                    | 17.5                      | 118883                          | 15.5                      | 132695                          | 0.8             | hierarchical regression |
| Colombia                         | 10.5                      | 89037                           | 10.0                      | 74309                           | 0.4             | hierarchical regression |
| Comoros                          | 25.9                      | 5271                            | 23.7                      | 6143                            | 0.6             | hierarchical regression |
| Congo                            | 13.5                      | 17109                           | 11.6                      | 20485                           | 1.0             | hierarchical regression |
| Cook Islands                     | 3.7                       | 15                              | 3.5                       | 12                              | 0.5             | hierarchical regression |

<sup>2</sup> India is counted among these 148 countries but as it only had partial data for the most recent survey, estimates are not reported. These data have been used in regional and global estimates. (India was labelled as partial data as no HMIS/ admin data met the inclusion criteria; one survey (National Family Health Survey, 2005-2006) was included, however for the latest survey (National Family Health Survey, 2015-16) only data for a single year met inclusion criteria and these partial data were used).

| Country                          | Low birthweight rate 2000 | Number of low birthweights 2000 | Low birthweight rate 2015 | Number of low birthweights 2015 | 2000-2015 ARR % | Source of estimate      |
|----------------------------------|---------------------------|---------------------------------|---------------------------|---------------------------------|-----------------|-------------------------|
| Costa Rica                       | 7.0                       | 5336                            | 7.5                       | 5222                            | -0.4            | b-spline regression     |
| Croatia                          | 5.4                       | 2454                            | 5.1                       | 2014                            | 0.4             | b-spline regression     |
| Cuba                             | 6.1                       | 8862                            | 5.3                       | 6604                            | 1.0             | b-spline regression     |
| Czechia                          | 5.8                       | 5146                            | 7.8                       | 8539                            | -2.0            | b-spline regression     |
| Democratic Republic of the Congo | 12.4                      | 269628                          | 10.8                      | 354423                          | 0.9             | hierarchical regression |
| Denmark                          | 5.1                       | 3384                            | 5.3                       | 3160                            | -0.2            | b-spline regression     |
| Dominican Republic               | 11.6                      | 25121                           | 11.3                      | 24386                           | 0.2             | hierarchical regression |
| Ecuador                          | 12.0                      | 37786                           | 11.2                      | 36967                           | 0.5             | hierarchical regression |
| El Salvador                      | 11.0                      | 15983                           | 10.3                      | 12156                           | 0.4             | hierarchical regression |
| Estonia                          | 4.3                       | 551                             | 4.3                       | 612                             | 0.0             | b-spline regression     |
| Finland                          | 4.3                       | 2473                            | 4.1                       | 2441                            | 0.3             | b-spline regression     |
| France                           | 7.5                       | 56693                           | 7.4                       | 56972                           | 0.1             | hierarchical regression |
| Gabon                            | 15.3                      | 6303                            | 14.2                      | 8190                            | 0.5             | hierarchical regression |
| Gambia                           | 19.2                      | 10743                           | 16.8                      | 13268                           | 0.9             | hierarchical regression |
| Georgia                          | 6.1                       | 3464                            | 6.1                       | 3372                            | 0.0             | b-spline regression     |
| Germany                          | 6.5                       | 48505                           | 6.6                       | 47226                           | -0.2            | b-spline regression     |
| Ghana                            | 16.1                      | 108083                          | 14.2                      | 123251                          | 0.8             | hierarchical regression |
| Greece                           | 9.0                       | 9971                            | 8.7                       | 8244                            | 0.2             | hierarchical regression |
| Guatemala                        | 12.2                      | 50363                           | 11.0                      | 45698                           | 0.7             | hierarchical regression |
| Guinea-Bissau                    | 25.3                      | 13029                           | 21.1                      | 13866                           | 1.2             | hierarchical regression |
| Guyana                           | 16.3                      | 3156                            | 15.6                      | 2486                            | 0.3             | hierarchical regression |
| Honduras                         | 11.9                      | 25353                           | 10.9                      | 21557                           | 0.6             | hierarchical regression |
| Hungary                          | 8.6                       | 8234                            | 8.8                       | 7727                            | -0.1            | b-spline regression     |
| Iceland                          | 3.5                       | 142                             | 4.2                       | 187                             | -1.3            | b-spline regression     |
| Indonesia                        | 11.2                      | 515897                          | 10.0                      | 497589                          | 0.8             | hierarchical regression |
| Ireland                          | 4.9                       | 2817                            | 5.9                       | 4036                            | -1.3            | b-spline regression     |
| Israel                           | 8.3                       | 10622                           | 7.8                       | 12958                           | 0.5             | b-spline regression     |
| Italy                            | 7.1                       | 37820                           | 7.0                       | 34486                           | 0.1             | hierarchical regression |
| Jamaica                          | 15.3                      | 8676                            | 14.6                      | 7039                            | 0.3             | hierarchical regression |
| Japan                            | 8.6                       | 100044                          | 9.5                       | 99957                           | -0.7            | b-spline regression     |
| Jordan                           | 14.6                      | 23242                           | 13.8                      | 33504                           | 0.4             | hierarchical regression |
| Kazakhstan                       | 6.1                       | 14507                           | 5.4                       | 20897                           | 0.8             | b-spline regression     |
| Kenya                            | 12.3                      | 154672                          | 11.5                      | 172422                          | 0.5             | hierarchical regression |
| Kuwait                           | 10.2                      | 4535                            | 9.9                       | 6384                            | 0.2             | hierarchical regression |
| Kyrgyzstan                       | 6.8                       | 7191                            | 5.5                       | 8414                            | 1.4             | b-spline regression     |
| Lao People's Democratic Republic | 20.4                      | 34663                           | 17.3                      | 28150                           | 1.1             | hierarchical regression |
| Latvia                           | 5.1                       | 992                             | 4.5                       | 909                             | 0.9             | b-spline regression     |
| Lebanon                          | 9.8                       | 6095                            | 9.2                       | 7937                            | 0.4             | hierarchical regression |
| Lesotho                          | 15.4                      | 9128                            | 14.6                      | 8947                            | 0.4             | hierarchical regression |
| Lithuania                        | 4.8                       | 1582                            | 4.5                       | 1405                            | 0.4             | hierarchical regression |
| Luxembourg                       | 6.6                       | 357                             | 6.5                       | 416                             | 0.1             | b-spline regression     |
| Madagascar                       | 19.8                      | 128925                          | 17.1                      | 139080                          | 1.0             | hierarchical regression |
| Malawi                           | 17.2                      | 86670                           | 14.5                      | 94488                           | 1.2             | hierarchical regression |
| Malaysia                         | 10.0                      | 50519                           | 11.3                      | 59463                           | -0.9            | b-spline regression     |
| Maldives                         | 15.6                      | 996                             | 11.7                      | 916                             | 1.9             | hierarchical regression |

| Country               | Low birthweight rate 2000 | Number of low birthweights 2000 | Low birthweight rate 2015 | Number of low birthweights 2015 | 2000-2015 ARR % | Source of estimate      |
|-----------------------|---------------------------|---------------------------------|---------------------------|---------------------------------|-----------------|-------------------------|
| Malta                 | 5.9                       | 264                             | 6.3                       | 266                             | -0.5            | b-spline regression     |
| Mauritius             | 12.7                      | 2550                            | 17.1                      | 2301                            | -2.0            | b-spline regression     |
| Mexico                | 8.2                       | 200551                          | 7.9                       | 183328                          | 0.3             | hierarchical regression |
| Monaco                | 5.5                       | 14                              | 5.4                       | 31                              | 0.1             | hierarchical regression |
| Mongolia              | 6.3                       | 2903                            | 5.4                       | 3934                            | 1.0             | hierarchical regression |
| Montenegro            | 5.3                       | 443                             | 5.5                       | 394                             | -0.2            | b-spline regression     |
| Morocco               | 18.8                      | 120339                          | 17.3                      | 122514                          | 0.5             | hierarchical regression |
| Mozambique            | 16.7                      | 136272                          | 13.8                      | 152668                          | 1.2             | hierarchical regression |
| Myanmar               | 13.9                      | 156773                          | 12.3                      | 116164                          | 0.8             | hierarchical regression |
| Namibia               | 16.5                      | 9816                            | 15.5                      | 11129                           | 0.4             | hierarchical regression |
| Nepal                 | 27.2                      | 206633                          | 21.8                      | 124951                          | 1.5             | hierarchical regression |
| Netherlands           | 7.1                       | 13998                           | 6.2                       | 10982                           | 0.9             | b-spline regression     |
| New Zealand           | 6.6                       | 3658                            | 5.7                       | 3507                            | 0.9             | b-spline regression     |
| Nicaragua             | 11.5                      | 15564                           | 10.7                      | 12934                           | 0.5             | hierarchical regression |
| Norway                | 4.9                       | 2853                            | 4.5                       | 2765                            | 0.6             | b-spline regression     |
| Oman                  | 10.9                      | 6079                            | 10.5                      | 8527                            | 0.2             | hierarchical regression |
| Panama                | 10.6                      | 7547                            | 10.1                      | 7944                            | 0.3             | hierarchical regression |
| Paraguay              | 8.6                       | 12335                           | 8.1                       | 11364                           | 0.4             | hierarchical regression |
| Peru                  | 10.1                      | 63271                           | 9.4                       | 57845                           | 0.5             | hierarchical regression |
| Philippines           | 21.5                      | 498118                          | 20.1                      | 480695                          | 0.4             | hierarchical regression |
| Poland                | 5.7                       | 21495                           | 5.9                       | 21711                           | -0.3            | b-spline regression     |
| Portugal              | 7.4                       | 8406                            | 8.9                       | 7382                            | -1.2            | b-spline regression     |
| Qatar                 | 9.1                       | 1073                            | 7.3                       | 1841                            | 1.4             | b-spline regression     |
| Republic of Korea     | 3.8                       | 21878                           | 5.8                       | 25903                           | -2.7            | b-spline regression     |
| Republic of Moldova   | 5.5                       | 2606                            | 5.0                       | 2137                            | 0.6             | hierarchical regression |
| Romania               | 8.8                       | 19556                           | 8.2                       | 15710                           | 0.5             | hierarchical regression |
| Russian Federation    | 7.4                       | 97741                           | 5.8                       | 107536                          | 1.6             | b-spline regression     |
| Rwanda                | 10.3                      | 31773                           | 7.9                       | 29128                           | 1.8             | hierarchical regression |
| San Marino            | 3.3                       | 6                               | 3.3                       | 8                               | 0.0             | hierarchical regression |
| Sao Tome and Principe | 7.2                       | 402                             | 6.6                       | 443                             | 0.6             | hierarchical regression |
| Senegal               | 22.0                      | 85504                           | 18.5                      | 100096                          | 1.1             | hierarchical regression |
| Serbia                | 4.7                       | 5563                            | 4.5                       | 4252                            | 0.3             | hierarchical regression |
| Seychelles            | 9.0                       | 140                             | 11.7                      | 182                             | -1.7            | b-spline regression     |
| Sierra Leone          | 17.2                      | 36833                           | 14.4                      | 37220                           | 1.2             | hierarchical regression |
| Singapore             | 9.8                       | 4867                            | 9.6                       | 4779                            | 0.1             | hierarchical regression |
| Slovakia              | 6.8                       | 3676                            | 7.6                       | 4331                            | -0.7            | b-spline regression     |
| Slovenia              | 5.6                       | 984                             | 6.1                       | 1315                            | -0.6            | b-spline regression     |
| South Africa          | 15.0                      | 166887                          | 14.2                      | 167050                          | 0.4             | hierarchical regression |
| Spain                 | 7.0                       | 28181                           | 8.3                       | 34336                           | -1.1            | b-spline regression     |
| Sri Lanka             | 16.3                      | 56878                           | 15.9                      | 51314                           | 0.2             | b-spline regression     |
| Suriname              | 16.0                      | 1756                            | 14.7                      | 1496                            | 0.6             | hierarchical regression |
| Swaziland             | 11.1                      | 3846                            | 10.3                      | 3987                            | 0.5             | hierarchical regression |
| Sweden                | 4.5                       | 4078                            | 2.4                       | 2861                            | 4.0             | b-spline regression     |
| Switzerland           | 6.0                       | 4588                            | 6.5                       | 5589                            | -0.5            | b-spline regression     |
| Tajikistan            | 6.2                       | 11577                           | 5.6                       | 14101                           | 0.6             | hierarchical regression |
| Thailand              | 13.5                      | 123614                          | 10.5                      | 76312                           | 1.7             | b-spline regression     |

| <b>Country</b>                            | <b>Low birthweight rate 2000</b> | <b>Number of low birthweights 2000</b> | <b>Low birthweight rate 2015</b> | <b>Number of low birthweights 2015</b> | <b>2000-2015 ARR %</b> | <b>Source of estimate</b> |
|-------------------------------------------|----------------------------------|----------------------------------------|----------------------------------|----------------------------------------|------------------------|---------------------------|
| The former Yugoslav Republic of Macedonia | 8.9                              | 2341                                   | 9.1                              | 2127                                   | -0.1                   | b-spline regression       |
| Togo                                      | 17.8                             | 34880                                  | 16.1                             | 41230                                  | 0.7                    | hierarchical regression   |
| Trinidad and Tobago                       | 13.1                             | 2447                                   | 12.4                             | 2348                                   | 0.4                    | hierarchical regression   |
| Tunisia                                   | 8.2                              | 13772                                  | 7.5                              | 15693                                  | 0.6                    | hierarchical regression   |
| Turkey                                    | 12.9                             | 176788                                 | 11.4                             | 147483                                 | 0.8                    | hierarchical regression   |
| Turkmenistan                              | 5.4                              | 5753                                   | 4.9                              | 7113                                   | 0.6                    | hierarchical regression   |
| Ukraine                                   | 5.4                              | 21861                                  | 5.6                              | 26996                                  | -0.3                   | b-spline regression       |
| United Arab Emirates                      | 13.0                             | 6930                                   | 12.7                             | 11613                                  | 0.2                    | hierarchical regression   |
| United Kingdom                            | 7.3                              | 50741                                  | 7.0                              | 56001                                  | 0.3                    | b-spline regression       |
| United Republic of Tanzania               | 12.4                             | 179397                                 | 10.5                             | 219037                                 | 1.1                    | hierarchical regression   |
| United States of America                  | 7.5                              | 297327                                 | 8.0                              | 321060                                 | -0.5                   | b-spline regression       |
| Uruguay                                   | 7.7                              | 4186                                   | 7.6                              | 3698                                   | 0.1                    | b-spline regression       |
| Uzbekistan                                | 5.8                              | 32601                                  | 5.3                              | 34881                                  | 0.6                    | hierarchical regression   |
| Vanuatu                                   | 11.1                             | 670                                    | 10.9                             | 756                                    | 0.1                    | hierarchical regression   |
| Venezuela (Bolivarian Republic of)        | 8.6                              | 50252                                  | 9.1                              | 54820                                  | -0.4                   | b-spline regression       |
| Viet Nam                                  | 9.2                              | 130071                                 | 8.2                              | 129885                                 | 0.8                    | hierarchical regression   |
| West Bank and Gaza Strip                  | 8.8                              | 10604                                  | 8.4                              | 12584                                  | 0.3                    | hierarchical regression   |
| Zambia                                    | 13.5                             | 63593                                  | 11.6                             | 71942                                  | 1.0                    | hierarchical regression   |
| Zimbabwe                                  | 12.4                             | 50797                                  | 12.6                             | 67607                                  | -0.1                   | hierarchical regression   |

Table 7.2: Estimated low birthweight number and rate globally and by region for low birthweight regions (2000-2015)

| Region                                           | Year        | Number of live births | Number low birthweight | Uncertainty range |            | Low birthweight rate | Uncertainty range |       |
|--------------------------------------------------|-------------|-----------------------|------------------------|-------------------|------------|----------------------|-------------------|-------|
|                                                  |             |                       |                        | Lower             | Upper      |                      | Lower             | Upper |
| Global                                           | 2000        | 130,555,200           | 22,902,400             | 18,405,800        | 27,798,400 | 17.5                 | 14.1              | 21.3  |
|                                                  | 2001        | 131,054,500           | 22,716,500             | 18,275,400        | 27,729,000 | 17.3                 | 13.9              | 21.2  |
|                                                  | 2002        | 131,737,600           | 22,536,700             | 18,396,400        | 27,714,600 | 17.1                 | 14.0              | 21.0  |
|                                                  | 2003        | 132,549,400           | 22,362,300             | 18,545,100        | 26,719,900 | 16.9                 | 14.0              | 20.2  |
|                                                  | 2004        | 133,444,700           | 22,197,500             | 18,043,200        | 27,027,100 | 16.6                 | 13.5              | 20.3  |
|                                                  | 2005        | 134,381,800           | 22,042,100             | 18,043,200        | 27,027,100 | 16.4                 | 13.4              | 20.1  |
|                                                  | 2006        | 135,327,700           | 21,880,000             | 17,961,100        | 26,252,100 | 16.2                 | 13.3              | 19.4  |
|                                                  | 2007        | 136,258,700           | 21,724,200             | 17,981,600        | 25,662,100 | 15.9                 | 13.2              | 18.8  |
|                                                  | 2008        | 137,147,100           | 21,569,700             | 17,875,900        | 25,692,100 | 15.7                 | 13.0              | 18.7  |
|                                                  | 2009        | 137,960,600           | 21,400,500             | 17,780,600        | 25,456,100 | 15.5                 | 12.9              | 18.5  |
|                                                  | 2010        | 138,670,500           | 21,231,900             | 17,917,600        | 25,347,400 | 15.3                 | 12.9              | 18.3  |
|                                                  | 2011        | 139,260,300           | 21,066,100             | 17,786,500        | 25,209,400 | 15.1                 | 12.8              | 18.1  |
|                                                  | 2012        | 139,737,600           | 20,900,300             | 17,685,600        | 24,825,000 | 15.0                 | 12.7              | 17.8  |
|                                                  | 2013        | 140,111,500           | 20,744,500             | 17,457,800        | 24,500,500 | 14.8                 | 12.5              | 17.5  |
|                                                  | 2014        | 140,383,200           | 20,603,300             | 17,457,800        | 24,500,500 | 14.7                 | 12.4              | 17.5  |
| 2015                                             | 140,554,200 | 20,469,700            | 17,375,000             | 24,017,900        | 14.6       | 12.4                 | 17.1              |       |
| North America, Europe, Australia and New Zealand | 2000        | 11,919,500            | 832,900                | 813,800           | 856,600    | 7.0                  | 6.8               | 7.2   |
|                                                  | 2001        | 11,956,300            | 839,600                | 823,100           | 860,500    | 7.0                  | 6.9               | 7.2   |
|                                                  | 2002        | 12,037,800            | 848,400                | 833,600           | 870,200    | 7.0                  | 6.9               | 7.2   |
|                                                  | 2003        | 12,152,400            | 858,600                | 842,200           | 880,700    | 7.1                  | 6.9               | 7.2   |
|                                                  | 2004        | 12,288,300            | 869,500                | 853,400           | 889,900    | 7.1                  | 6.9               | 7.2   |
|                                                  | 2005        | 12,429,200            | 879,900                | 864,200           | 900,300    | 7.1                  | 7.0               | 7.2   |
|                                                  | 2006        | 12,558,100            | 888,700                | 873,900           | 910,400    | 7.1                  | 7.0               | 7.2   |
|                                                  | 2007        | 12,663,500            | 895,300                | 878,800           | 916,600    | 7.1                  | 6.9               | 7.2   |
|                                                  | 2008        | 12,738,000            | 899,300                | 883,400           | 918,900    | 7.1                  | 6.9               | 7.2   |
|                                                  | 2009        | 12,777,700            | 900,600                | 885,000           | 920,600    | 7.0                  | 6.9               | 7.2   |
|                                                  | 2010        | 12,784,800            | 899,500                | 884,200           | 920,400    | 7.0                  | 6.9               | 7.2   |
|                                                  | 2011        | 12,767,700            | 896,700                | 880,800           | 918,000    | 7.0                  | 6.9               | 7.2   |
|                                                  | 2012        | 12,740,200            | 893,300                | 879,300           | 913,200    | 7.0                  | 6.9               | 7.2   |
|                                                  | 2013        | 12,713,400            | 890,000                | 874,700           | 911,300    | 7.0                  | 6.9               | 7.2   |
|                                                  | 2014        | 12,691,600            | 887,000                | 872,000           | 908,100    | 7.0                  | 6.9               | 7.2   |
| 2015                                             | 12,676,500  | 884,400               | 866,900                | 905,600           | 7.0        | 6.8                  | 7.1               |       |
| Northern Africa                                  | 2000        | 4,391,300             | 602,400                | 458,800           | 846,700    | 13.7                 | 10.4              | 19.3  |
|                                                  | 2001        | 4,432,400             | 604,200                | 462,100           | 852,400    | 13.6                 | 10.4              | 19.2  |
|                                                  | 2002        | 4,486,700             | 607,200                | 461,000           | 872,400    | 13.5                 | 10.3              | 19.4  |
|                                                  | 2003        | 4,551,700             | 610,900                | 471,600           | 880,800    | 13.4                 | 10.4              | 19.4  |
|                                                  | 2004        | 4,627,300             | 615,500                | 481,500           | 885,500    | 13.3                 | 10.4              | 19.1  |
|                                                  | 2005        | 4,717,800             | 622,100                | 480,300           | 888,700    | 13.2                 | 10.2              | 18.8  |
|                                                  | 2006        | 4,829,400             | 630,800                | 478,100           | 903,200    | 13.1                 | 9.9               | 18.7  |
|                                                  | 2007        | 4,963,200             | 642,000                | 494,300           | 946,700    | 12.9                 | 10.0              | 19.1  |
|                                                  | 2008        | 5,115,500             | 655,200                | 496,300           | 935,000    | 12.8                 | 9.7               | 18.3  |
|                                                  | 2009        | 5,279,100             | 670,100                | 503,800           | 949,500    | 12.7                 | 9.5               | 18.0  |
|                                                  | 2010        | 5,440,800             | 684,800                | 517,500           | 1,011,700  | 12.6                 | 9.5               | 18.6  |
|                                                  | 2011        | 5,585,400             | 697,900                | 533,700           | 987,100    | 12.5                 | 9.6               | 17.7  |
|                                                  | 2012        | 5,701,200             | 707,500                | 543,900           | 1,015,900  | 12.4                 | 9.5               | 17.8  |
| 2013                                             | 5,780,800   | 713,300               | 551,000                | 1,031,600         | 12.3       | 9.5                  | 17.8              |       |

| Region                                                | Year       | Number of live births | Number low birthweight | Uncertainty range |            | Low birthweight rate | Uncertainty range |       |
|-------------------------------------------------------|------------|-----------------------|------------------------|-------------------|------------|----------------------|-------------------|-------|
|                                                       |            |                       |                        | Lower             | Upper      |                      | Lower             | Upper |
| Sub-Saharan Africa (Southern/East/West/Middle Africa) | 2014       | 5,821,700             | 715,000                | 521,200           | 1,059,900  | 12.3                 | 9.0               | 18.2  |
|                                                       | 2015       | 5,826,100             | 712,600                | 546,300           | 1,043,500  | 12.2                 | 9.4               | 17.9  |
|                                                       | 2000       | 26,994,800            | 4,436,000              | 3,729,700         | 5,499,000  | 16.4                 | 13.8              | 20.4  |
|                                                       | 2001       | 27,569,600            | 4,480,800              | 3,777,600         | 5,492,300  | 16.3                 | 13.7              | 19.9  |
|                                                       | 2002       | 28,151,800            | 4,522,900              | 3,782,700         | 5,559,400  | 16.1                 | 13.4              | 19.7  |
|                                                       | 2003       | 28,742,100            | 4,562,500              | 3,856,800         | 5,624,600  | 15.9                 | 13.4              | 19.6  |
|                                                       | 2004       | 29,339,000            | 4,599,300              | 3,906,800         | 5,692,200  | 15.7                 | 13.3              | 19.4  |
|                                                       | 2005       | 29,941,100            | 4,634,400              | 3,927,000         | 5,800,500  | 15.5                 | 13.1              | 19.4  |
|                                                       | 2006       | 30,546,900            | 4,669,600              | 3,950,900         | 5,654,500  | 15.3                 | 12.9              | 18.5  |
|                                                       | 2007       | 31,153,800            | 4,706,300              | 4,022,600         | 5,720,500  | 15.1                 | 12.9              | 18.4  |
|                                                       | 2008       | 31,758,900            | 4,743,200              | 4,066,500         | 5,833,900  | 14.9                 | 12.8              | 18.4  |
|                                                       | 2009       | 32,359,400            | 4,780,400              | 4,093,100         | 5,903,000  | 14.8                 | 12.6              | 18.2  |
|                                                       | 2010       | 32,951,700            | 4,819,400              | 4,165,100         | 5,940,500  | 14.6                 | 12.6              | 18.0  |
|                                                       | 2011       | 33,532,700            | 4,857,800              | 4,208,600         | 5,979,200  | 14.5                 | 12.6              | 17.8  |
|                                                       | 2012       | 34,102,000            | 4,893,900              | 4,229,100         | 5,994,600  | 14.4                 | 12.4              | 17.6  |
| 2013                                                  | 34,660,200 | 4,929,900             | 4,256,100              | 6,028,000         | 14.2       | 12.3                 | 17.4              |       |
| 2014                                                  | 35,208,400 | 4,965,300             | 4,328,600              | 6,155,600         | 14.1       | 12.3                 | 17.5              |       |
| 2015                                                  | 35,748,700 | 5,000,100             | 4,349,600              | 6,146,300         | 14.0       | 12.2                 | 17.2              |       |
| Central Asia                                          | 2000       | 1,203,800             | 71,700                 | 62,000            | 83,500     | 6.0                  | 5.1               | 6.9   |
|                                                       | 2001       | 1,194,800             | 69,600                 | 60,200            | 82,800     | 5.8                  | 5.0               | 6.9   |
|                                                       | 2002       | 1,199,800             | 68,700                 | 59,300            | 80,200     | 5.7                  | 4.9               | 6.7   |
|                                                       | 2003       | 1,217,700             | 68,800                 | 59,600            | 80,900     | 5.6                  | 4.9               | 6.6   |
|                                                       | 2004       | 1,247,200             | 69,800                 | 61,200            | 81,500     | 5.6                  | 4.9               | 6.5   |
|                                                       | 2005       | 1,286,700             | 71,700                 | 63,000            | 82,600     | 5.6                  | 4.9               | 6.4   |
|                                                       | 2006       | 1,333,800             | 74,200                 | 65,400            | 85,700     | 5.6                  | 4.9               | 6.4   |
|                                                       | 2007       | 1,384,700             | 77,200                 | 67,500            | 89,800     | 5.6                  | 4.9               | 6.5   |
|                                                       | 2008       | 1,435,500             | 80,200                 | 71,200            | 92,900     | 5.6                  | 5.0               | 6.5   |
|                                                       | 2009       | 1,482,900             | 83,000                 | 73,200            | 96,100     | 5.6                  | 4.9               | 6.5   |
|                                                       | 2010       | 1,523,600             | 85,500                 | 76,100            | 97,000     | 5.6                  | 5.0               | 6.4   |
|                                                       | 2011       | 1,555,600             | 87,200                 | 77,700            | 98,400     | 5.6                  | 5.0               | 6.3   |
|                                                       | 2012       | 1,578,600             | 88,100                 | 78,600            | 100,800    | 5.6                  | 5.0               | 6.4   |
|                                                       | 2013       | 1,592,900             | 88,200                 | 78,500            | 100,300    | 5.5                  | 4.9               | 6.3   |
|                                                       | 2014       | 1,598,400             | 87,300                 | 78,300            | 100,300    | 5.5                  | 4.9               | 6.3   |
| 2015                                                  | 1,595,200  | 85,500                | 76,200                 | 96,700            | 5.4        | 4.8                  | 6.1               |       |
| Southern Asia                                         | 2000       | 39,312,400            | 12,694,600             | 8,800,300         | 17,292,700 | 32.3                 | 22.4              | 44.0  |
|                                                       | 2001       | 39,300,300            | 12,493,000             | 8,552,900         | 17,199,800 | 31.8                 | 21.8              | 43.8  |
|                                                       | 2002       | 39,287,700            | 12,291,400             | 8,537,900         | 16,610,700 | 31.3                 | 21.7              | 42.3  |
|                                                       | 2003       | 39,273,300            | 12,091,400             | 8,362,100         | 16,374,700 | 30.8                 | 21.3              | 41.7  |
|                                                       | 2004       | 39,251,300            | 11,898,600             | 8,252,700         | 16,435,300 | 30.3                 | 21.0              | 41.9  |
|                                                       | 2005       | 39,205,000            | 11,710,400             | 7,902,800         | 16,027,800 | 29.9                 | 20.2              | 40.9  |
|                                                       | 2006       | 39,113,700            | 11,512,300             | 8,143,700         | 15,406,000 | 29.4                 | 20.8              | 39.4  |
|                                                       | 2007       | 38,966,500            | 11,313,100             | 7,818,700         | 15,214,900 | 29.0                 | 20.1              | 39.0  |
|                                                       | 2008       | 38,762,300            | 11,112,600             | 7,849,500         | 14,926,300 | 28.7                 | 20.3              | 38.5  |
|                                                       | 2009       | 38,509,000            | 10,893,800             | 7,632,900         | 14,782,900 | 28.3                 | 19.8              | 38.4  |
|                                                       | 2010       | 38,227,700            | 10,676,200             | 7,573,100         | 14,701,100 | 27.9                 | 19.8              | 38.5  |
|                                                       | 2011       | 37,946,800            | 10,467,000             | 7,397,200         | 14,190,900 | 27.6                 | 19.5              | 37.4  |
|                                                       | 2012       | 37,692,900            | 10,270,500             | 7,123,400         | 13,991,700 | 27.2                 | 18.9              | 37.1  |
|                                                       | 2013       | 37,483,600            | 10,093,900             | 7,131,100         | 13,914,700 | 26.9                 | 19.0              | 37.1  |
| 2014                                                  | 37,323,900 | 9,941,900             | 7,148,800              | 13,649,600        | 26.6       | 19.2                 | 36.6              |       |

| Region                                                            | Year         | Number of live births | Number low birthweight | Uncertainty range |            | Low birthweight rate | Uncertainty range |       |
|-------------------------------------------------------------------|--------------|-----------------------|------------------------|-------------------|------------|----------------------|-------------------|-------|
|                                                                   |              |                       |                        | Lower             | Upper      |                      | Lower             | Upper |
| Eastern Asia                                                      | 2015         | 37,208,500            | 9,807,400              | 6,913,700         | 13,104,600 | 26.4                 | 18.6              | 35.2  |
|                                                                   | 2000         | 18,513,800            | 1,111,000              | 900,100           | 1,364,100  | 6.0                  | 4.9               | 7.4   |
|                                                                   | 2001         | 18,385,100            | 1,094,400              | 891,600           | 1,375,400  | 6.0                  | 4.8               | 7.5   |
|                                                                   | 2002         | 18,353,100            | 1,080,300              | 871,500           | 1,328,400  | 5.9                  | 4.7               | 7.2   |
|                                                                   | 2003         | 18,385,300            | 1,069,600              | 873,200           | 1,313,200  | 5.8                  | 4.7               | 7.1   |
|                                                                   | 2004         | 18,458,300            | 1,060,500              | 868,600           | 1,313,100  | 5.7                  | 4.7               | 7.1   |
|                                                                   | 2005         | 18,558,400            | 1,054,300              | 862,200           | 1,286,800  | 5.7                  | 4.6               | 6.9   |
|                                                                   | 2006         | 18,681,600            | 1,049,500              | 856,200           | 1,313,000  | 5.6                  | 4.6               | 7.0   |
|                                                                   | 2007         | 18,827,700            | 1,047,700              | 854,000           | 1,306,700  | 5.6                  | 4.5               | 6.9   |
|                                                                   | 2008         | 18,988,100            | 1,046,900              | 863,800           | 1,304,600  | 5.5                  | 4.5               | 6.9   |
|                                                                   | 2009         | 19,144,600            | 1,047,100              | 865,100           | 1,304,300  | 5.5                  | 4.5               | 6.8   |
|                                                                   | 2010         | 19,274,100            | 1,046,200              | 849,600           | 1,295,300  | 5.4                  | 4.4               | 6.7   |
|                                                                   | 2011         | 19,355,700            | 1,044,900              | 843,300           | 1,271,300  | 5.4                  | 4.4               | 6.6   |
|                                                                   | 2012         | 19,378,900            | 1,040,500              | 853,800           | 1,278,300  | 5.4                  | 4.4               | 6.6   |
|                                                                   | Western Asia | 2013                  | 19,337,200             | 1,033,400         | 848,600    | 1,259,000            | 5.3               | 4.4   |
| 2014                                                              |              | 19,226,900            | 1,023,400              | 838,200           | 1,270,500  | 5.3                  | 4.4               | 6.6   |
| 2015                                                              |              | 19,047,600            | 1,010,600              | 822,600           | 1,264,800  | 5.3                  | 4.3               | 6.6   |
| 2000                                                              |              | 4,877,700             | 532,300                | 437,400           | 667,200    | 10.9                 | 9.0               | 13.7  |
| 2001                                                              |              | 4,902,100             | 531,100                | 440,100           | 650,300    | 10.8                 | 9.0               | 13.3  |
| 2002                                                              |              | 4,934,100             | 530,700                | 436,100           | 655,300    | 10.8                 | 8.8               | 13.3  |
| 2003                                                              |              | 4,974,700             | 530,700                | 436,800           | 670,700    | 10.7                 | 8.8               | 13.5  |
| 2004                                                              |              | 5,023,900             | 531,400                | 439,800           | 662,200    | 10.6                 | 8.8               | 13.2  |
| 2005                                                              |              | 5,082,100             | 533,000                | 439,200           | 669,600    | 10.5                 | 8.6               | 13.2  |
| 2006                                                              |              | 5,148,900             | 535,700                | 440,000           | 682,100    | 10.4                 | 8.5               | 13.2  |
| 2007                                                              |              | 5,221,600             | 539,200                | 442,500           | 679,500    | 10.3                 | 8.5               | 13.0  |
| 2008                                                              |              | 5,296,900             | 543,200                | 450,200           | 674,600    | 10.3                 | 8.5               | 12.7  |
| 2009                                                              |              | 5,371,600             | 547,300                | 441,700           | 696,800    | 10.2                 | 8.2               | 13.0  |
| 2010                                                              |              | 5,441,700             | 551,100                | 447,900           | 689,300    | 10.1                 | 8.2               | 12.7  |
| South-east Asia and Oceania (excluding Australia and New Zealand) |              | 2011                  | 5,503,200              | 554,700           | 452,800    | 701,400              | 10.1              | 8.2   |
|                                                                   | 2012         | 5,554,300             | 557,200                | 457,700           | 696,200    | 10.0                 | 8.2               | 12.5  |
|                                                                   | 2013         | 5,594,000             | 559,000                | 457,400           | 712,600    | 10.0                 | 8.2               | 12.7  |
|                                                                   | 2014         | 5,622,100             | 560,000                | 461,000           | 715,100    | 10.0                 | 8.2               | 12.7  |
|                                                                   | 2015         | 5,639,400             | 560,200                | 456,400           | 703,000    | 9.9                  | 8.1               | 12.5  |
|                                                                   | 2000         | 11,735,300            | 1,598,600              | 1,190,300         | 1,947,200  | 13.6                 | 10.1              | 16.6  |
|                                                                   | 2001         | 11,788,700            | 1,586,900              | 1,201,000         | 1,908,000  | 13.5                 | 10.2              | 16.2  |
|                                                                   | 2002         | 11,850,800            | 1,577,300              | 1,198,900         | 1,894,100  | 13.3                 | 10.1              | 16.0  |
|                                                                   | 2003         | 11,910,100            | 1,568,000              | 1,192,000         | 1,863,400  | 13.2                 | 10.0              | 15.6  |
|                                                                   | 2004         | 11,961,200            | 1,559,400              | 1,187,500         | 1,862,900  | 13.0                 | 9.9               | 15.6  |
|                                                                   | 2005         | 12,001,900            | 1,550,900              | 1,194,100         | 1,864,200  | 12.9                 | 9.9               | 15.5  |
|                                                                   | 2006         | 12,033,400            | 1,541,900              | 1,198,600         | 1,827,600  | 12.8                 | 10.0              | 15.2  |
|                                                                   | 2007         | 12,060,300            | 1,534,200              | 1,184,100         | 1,831,900  | 12.7                 | 9.8               | 15.2  |
|                                                                   | 2008         | 12,085,200            | 1,526,600              | 1,196,000         | 1,825,500  | 12.6                 | 9.9               | 15.1  |
|                                                                   | 2009         | 12,107,300            | 1,520,100              | 1,183,800         | 1,818,900  | 12.6                 | 9.8               | 15.0  |
| 2010                                                              | 12,124,200   | 1,513,700             | 1,181,000              | 1,815,000         | 12.5       | 9.7                  | 15.0              |       |
| 2011                                                              | 12,133,000   | 1,507,200             | 1,170,200              | 1,797,500         | 12.4       | 9.6                  | 14.8              |       |
| 2012                                                              | 12,131,400   | 1,499,600             | 1,178,000              | 1,792,100         | 12.4       | 9.7                  | 14.8              |       |
| 2013                                                              | 12,118,600   | 1,491,100             | 1,182,700              | 1,811,900         | 12.3       | 9.8                  | 15.0              |       |
| 2014                                                              | 12,094,900   | 1,481,600             | 1,154,900              | 1,760,300         | 12.2       | 9.5                  | 14.6              |       |
| 2015                                                              | 12,061,800   | 1,471,000             | 1,151,700              | 1,763,800         | 12.2       | 9.5                  | 14.6              |       |

| Region                          | Year       | Number of live births | Number low birthweight | Uncertainty range |           | Low birthweight rate | Uncertainty range |       |
|---------------------------------|------------|-----------------------|------------------------|-------------------|-----------|----------------------|-------------------|-------|
|                                 |            |                       |                        | Lower             | Upper     |                      | Lower             | Upper |
| Latin America and the Caribbean | 2000       | 11,606,900            | 1,023,300              | 945,800           | 1,113,500 | 8.8                  | 8.1               | 9.6   |
|                                 | 2001       | 11,525,600            | 1,017,300              | 942,300           | 1,115,900 | 8.8                  | 8.2               | 9.7   |
|                                 | 2002       | 11,436,100            | 1,010,100              | 933,500           | 1,106,000 | 8.8                  | 8.2               | 9.7   |
|                                 | 2003       | 11,342,500            | 1,002,200              | 929,200           | 1,090,100 | 8.8                  | 8.2               | 9.6   |
|                                 | 2004       | 11,248,600            | 993,900                | 926,000           | 1,088,800 | 8.8                  | 8.2               | 9.7   |
|                                 | 2005       | 11,160,000            | 985,800                | 912,000           | 1,076,300 | 8.8                  | 8.2               | 9.6   |
|                                 | 2006       | 11,082,300            | 977,600                | 903,700           | 1,069,200 | 8.8                  | 8.2               | 9.6   |
|                                 | 2007       | 11,017,800            | 969,600                | 898,400           | 1,063,900 | 8.8                  | 8.2               | 9.7   |
|                                 | 2008       | 10,967,100            | 963,100                | 893,700           | 1,053,200 | 8.8                  | 8.1               | 9.6   |
|                                 | 2009       | 10,929,500            | 958,600                | 887,500           | 1,050,900 | 8.8                  | 8.1               | 9.6   |
|                                 | 2010       | 10,902,200            | 955,700                | 885,100           | 1,053,200 | 8.8                  | 8.1               | 9.7   |
|                                 | 2011       | 10,880,500            | 953,200                | 888,100           | 1,042,000 | 8.8                  | 8.2               | 9.6   |
|                                 | 2012       | 10,858,500            | 949,900                | 870,800           | 1,040,300 | 8.7                  | 8.0               | 9.6   |
|                                 | 2013       | 10,831,100            | 946,100                | 879,700           | 1,046,100 | 8.7                  | 8.1               | 9.7   |
|                                 | 2014       | 10,795,700            | 942,200                | 876,000           | 1,036,700 | 8.7                  | 8.1               | 9.6   |
| 2015                            | 10,751,000 | 938,300               | 871,500                | 1,032,100         | 8.7       | 8.1                  | 9.6               |       |



Figure 7.3: Graphs by country of data inputs and low birthweight rate estimates with associated uncertainty

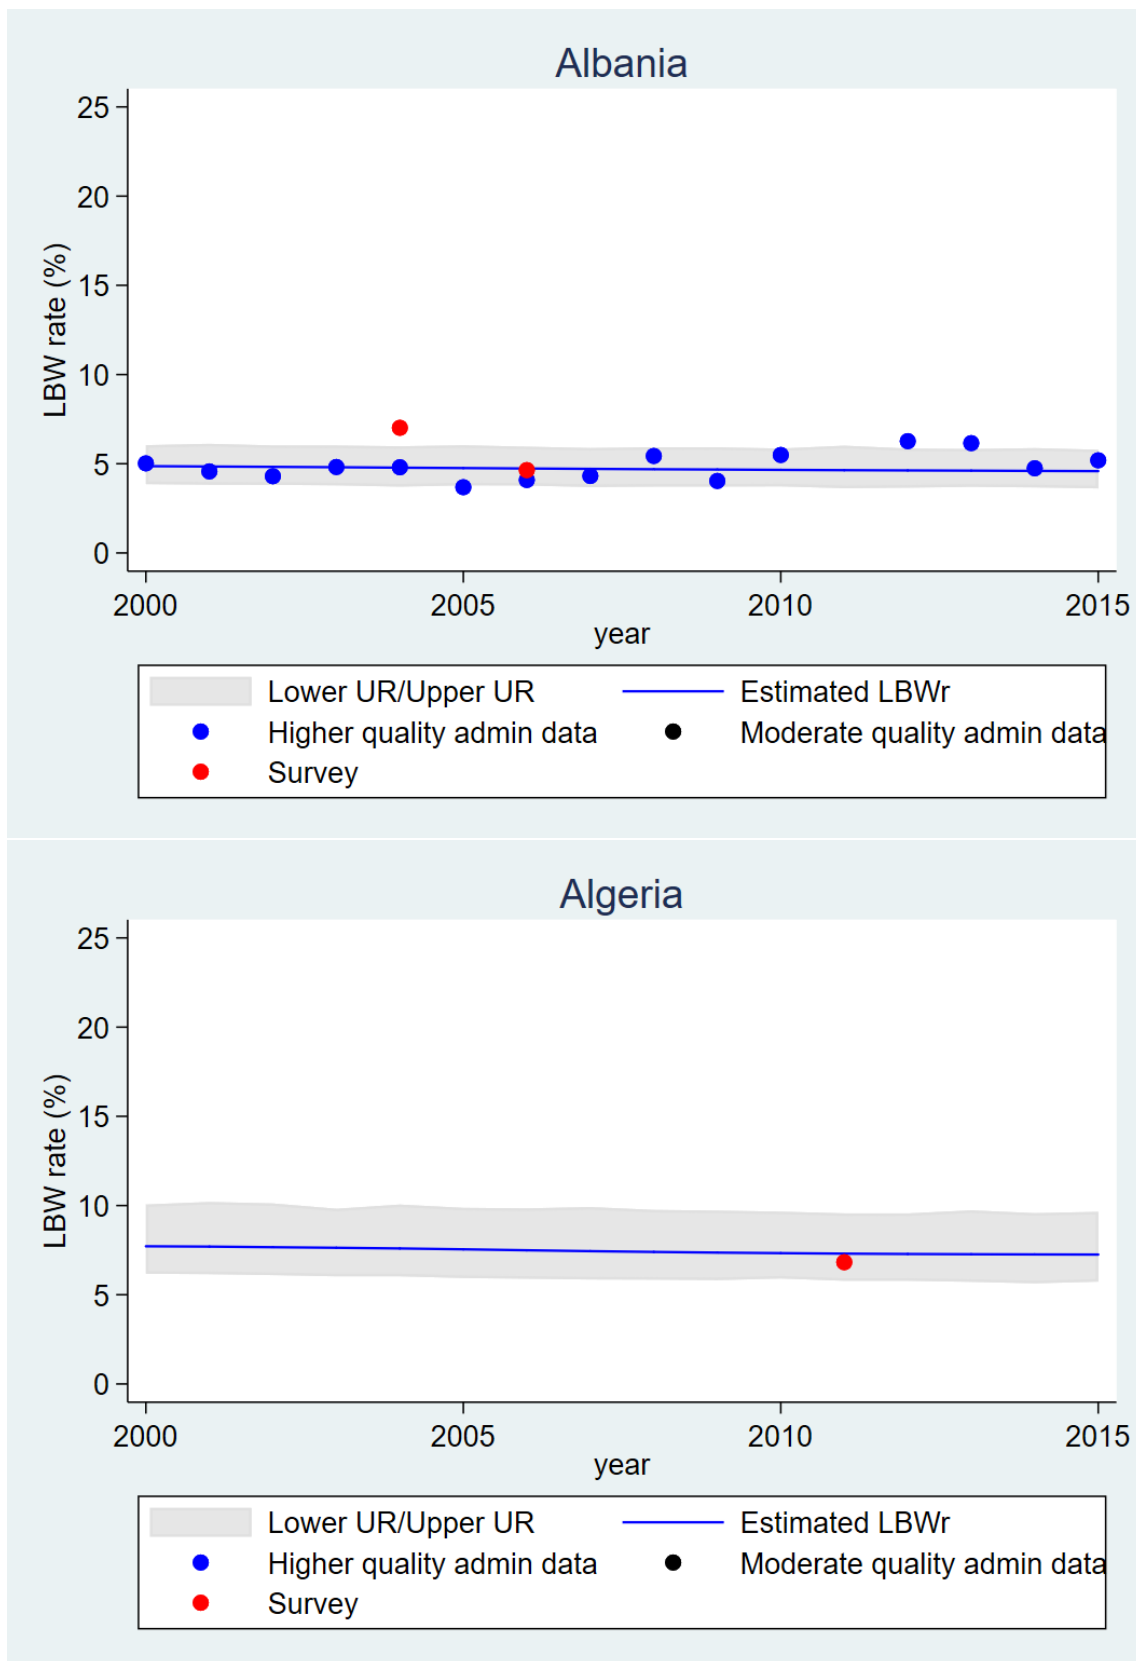

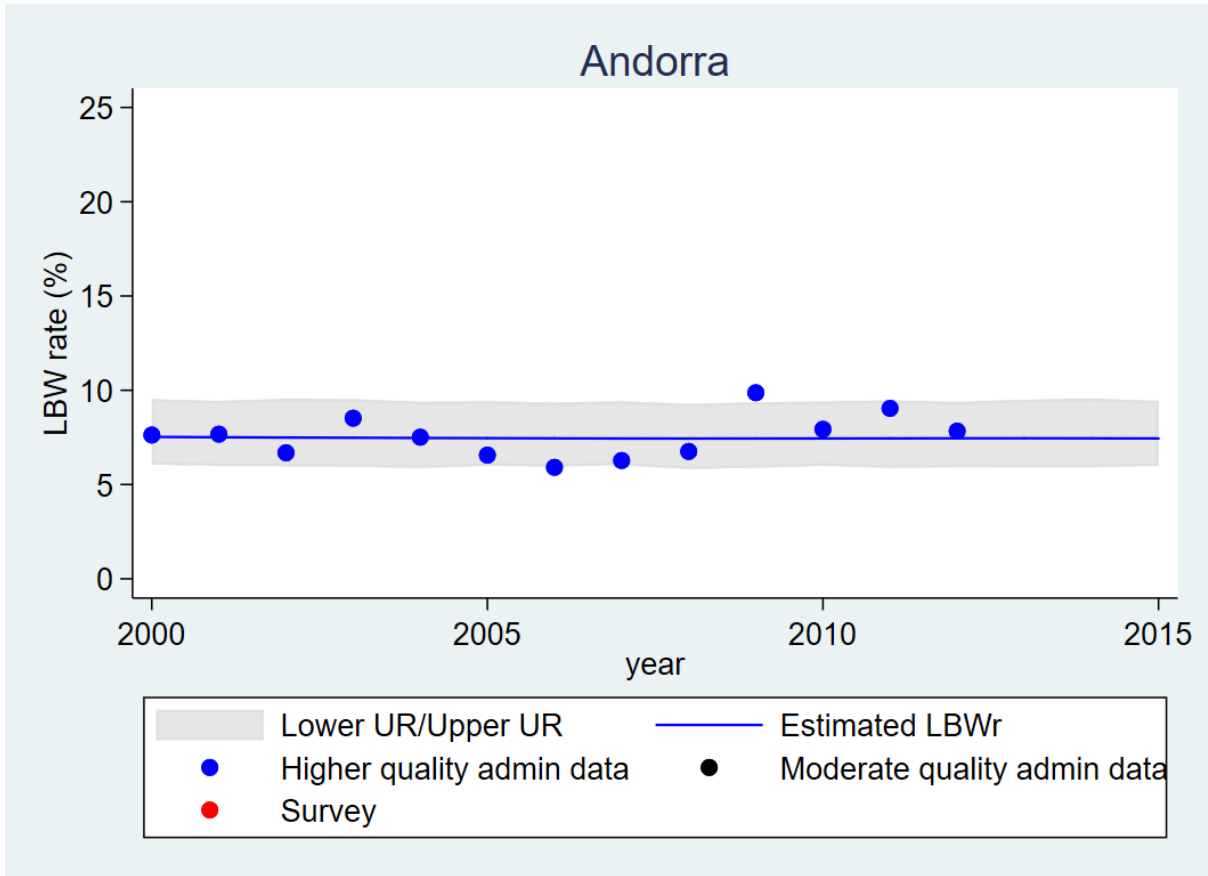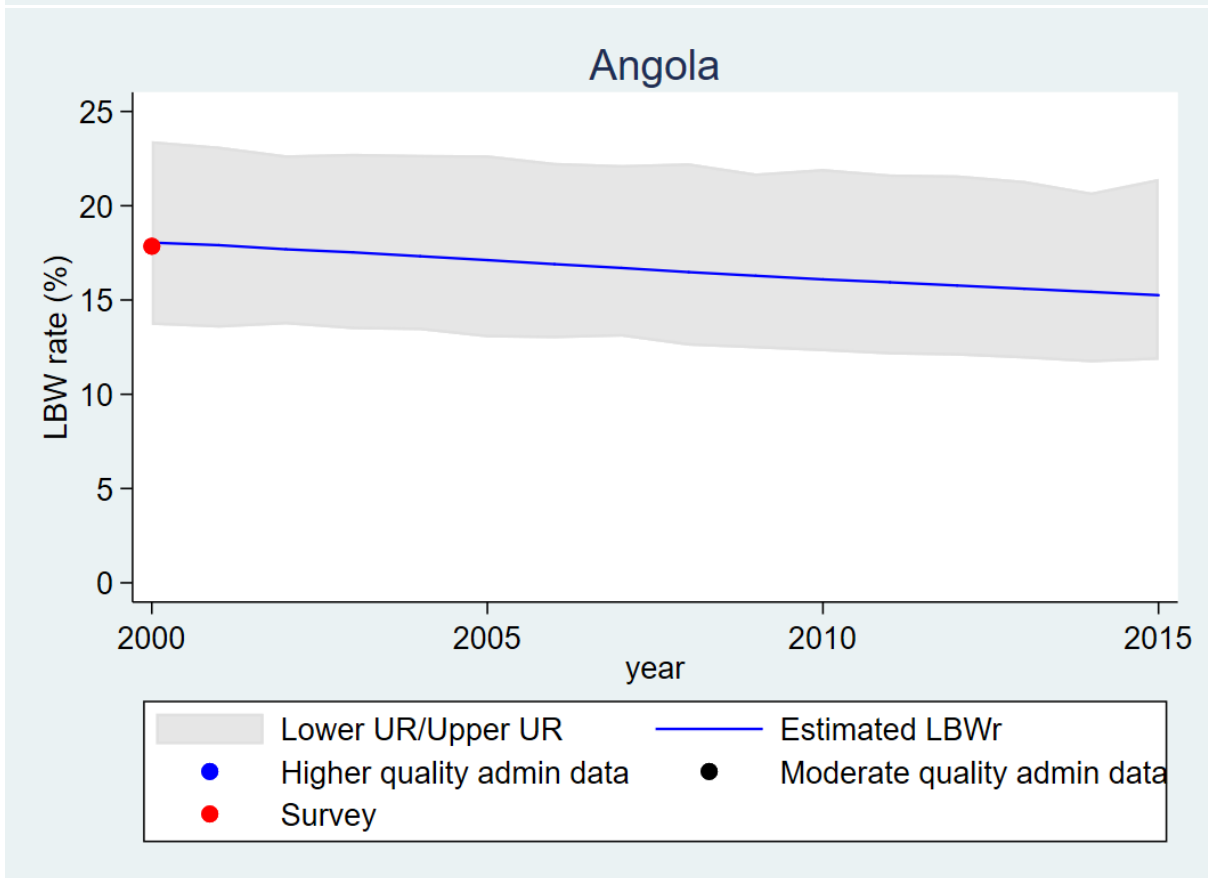

### Antigua and Barbuda

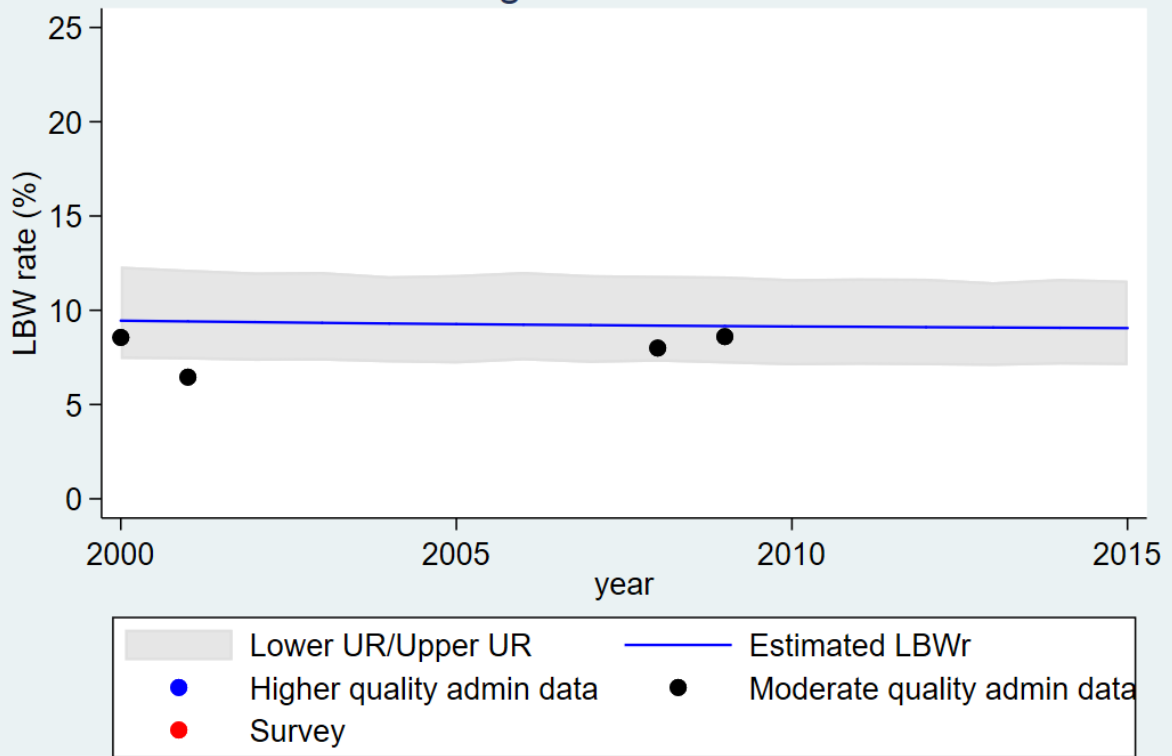

### Argentina

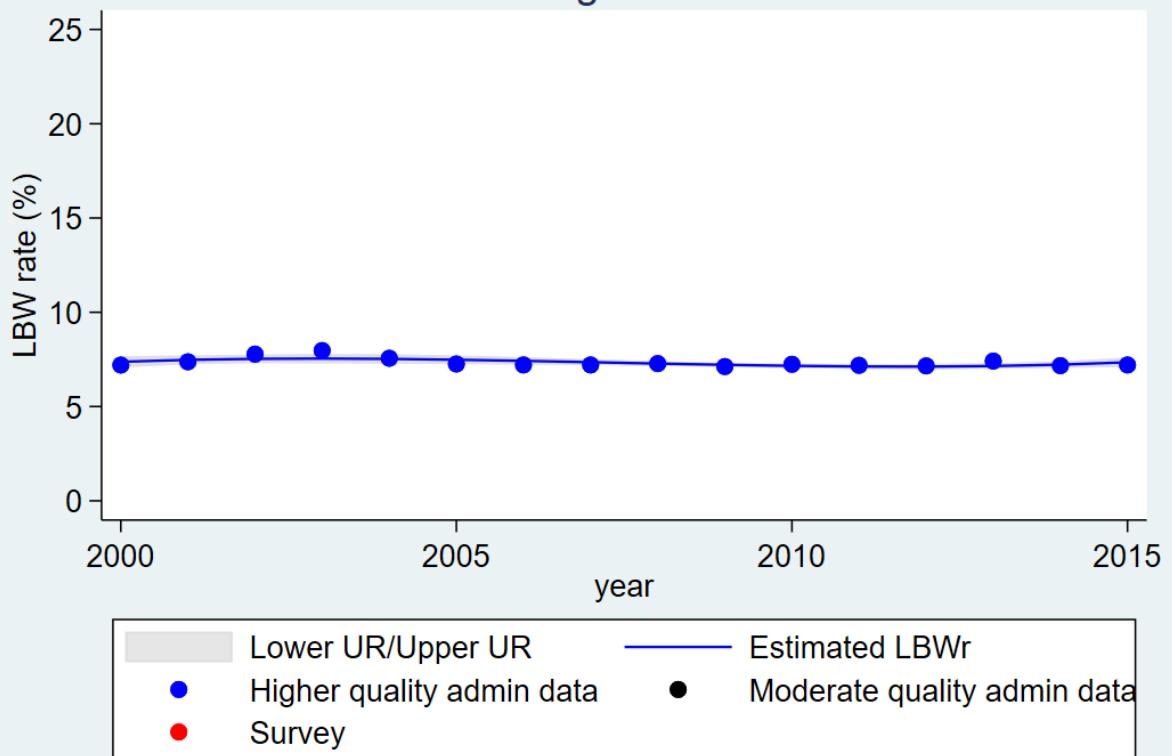

### Armenia

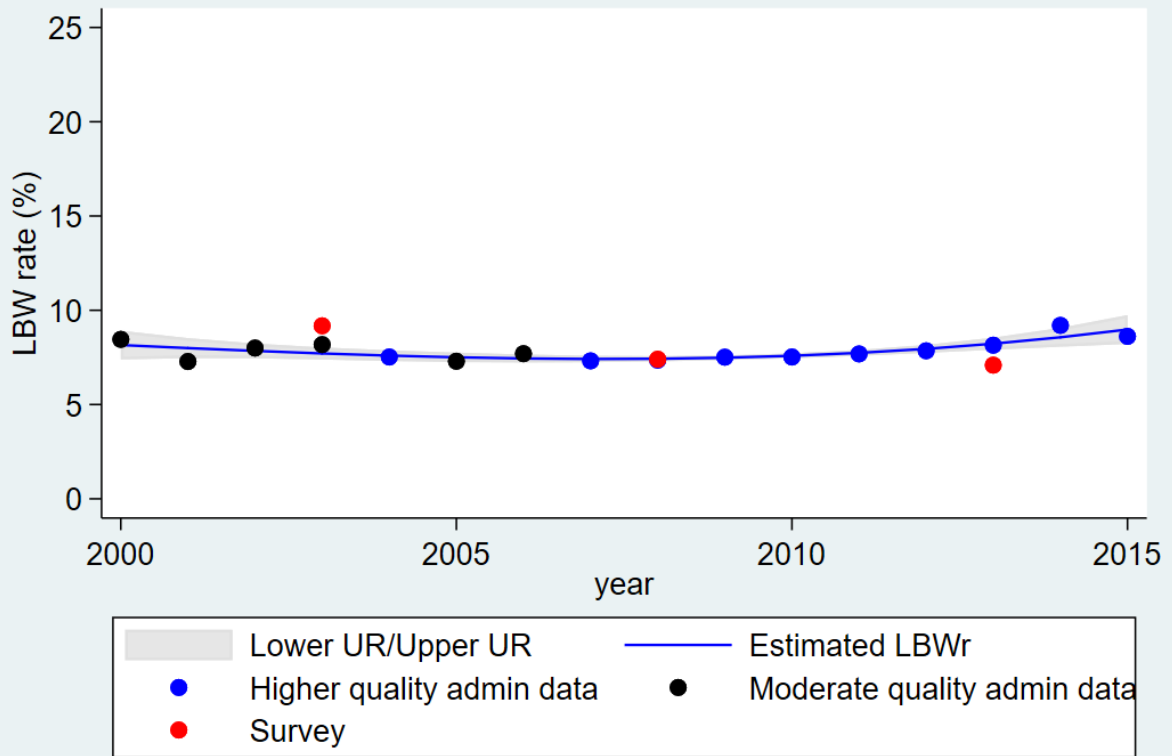

### Australia

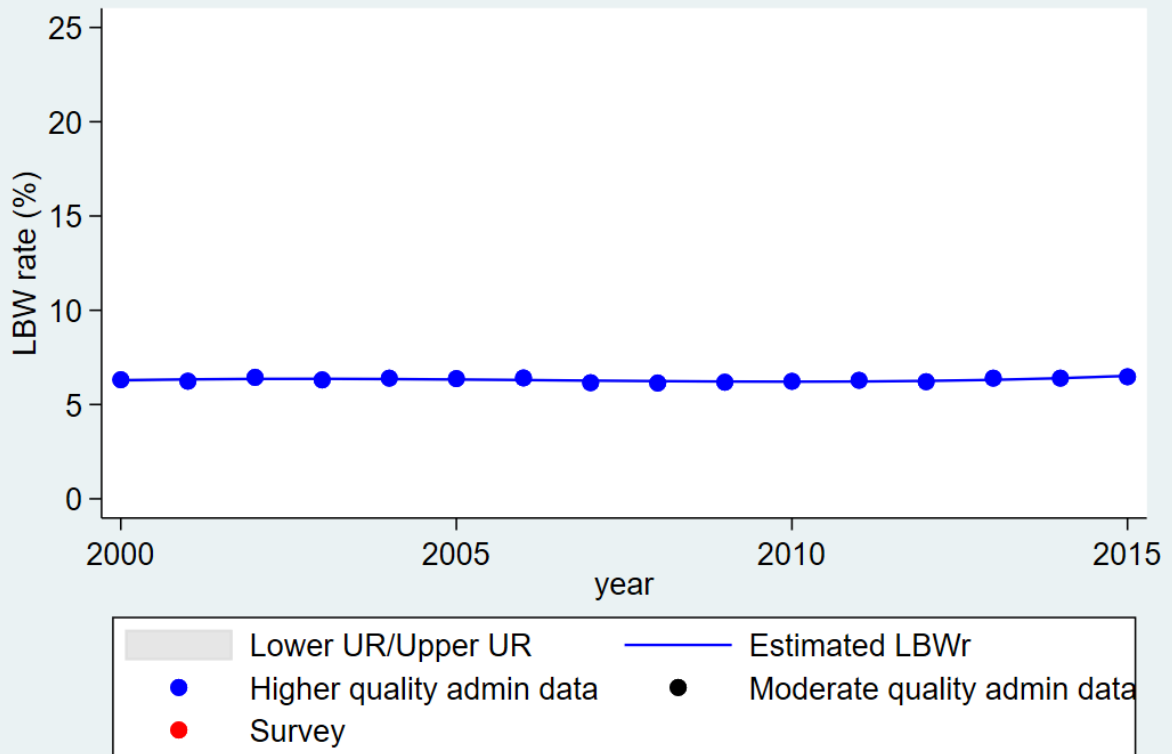

### Austria

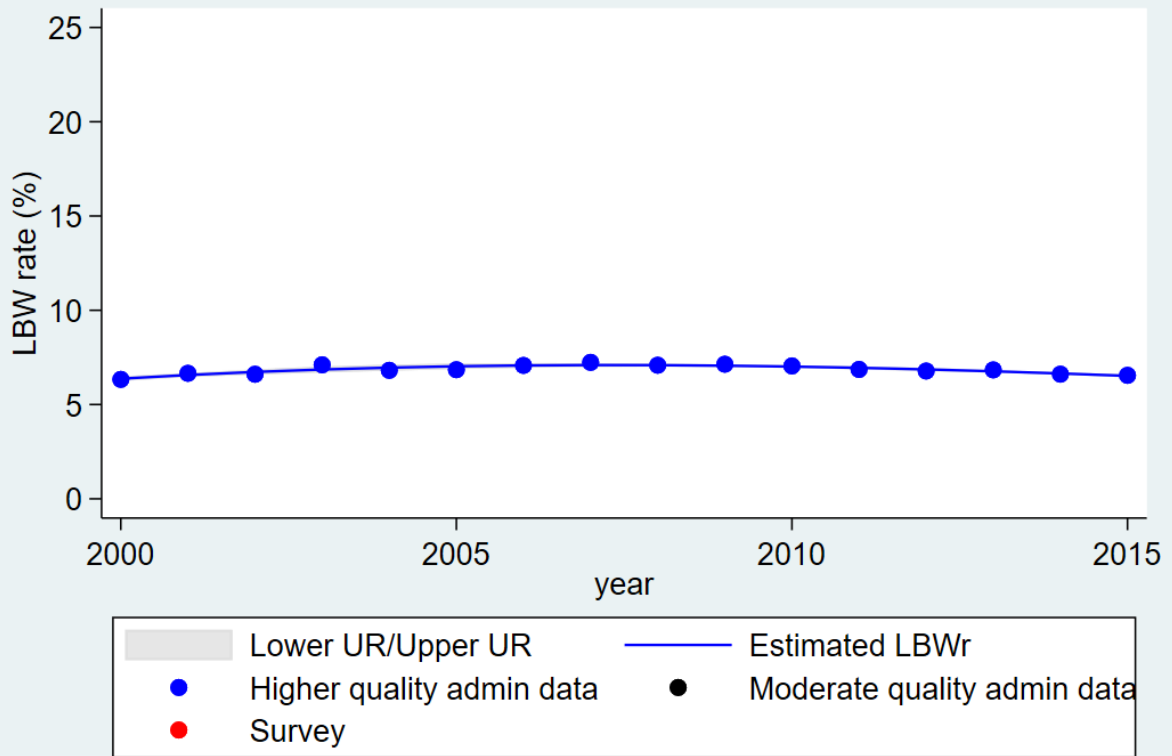

### Azerbaijan

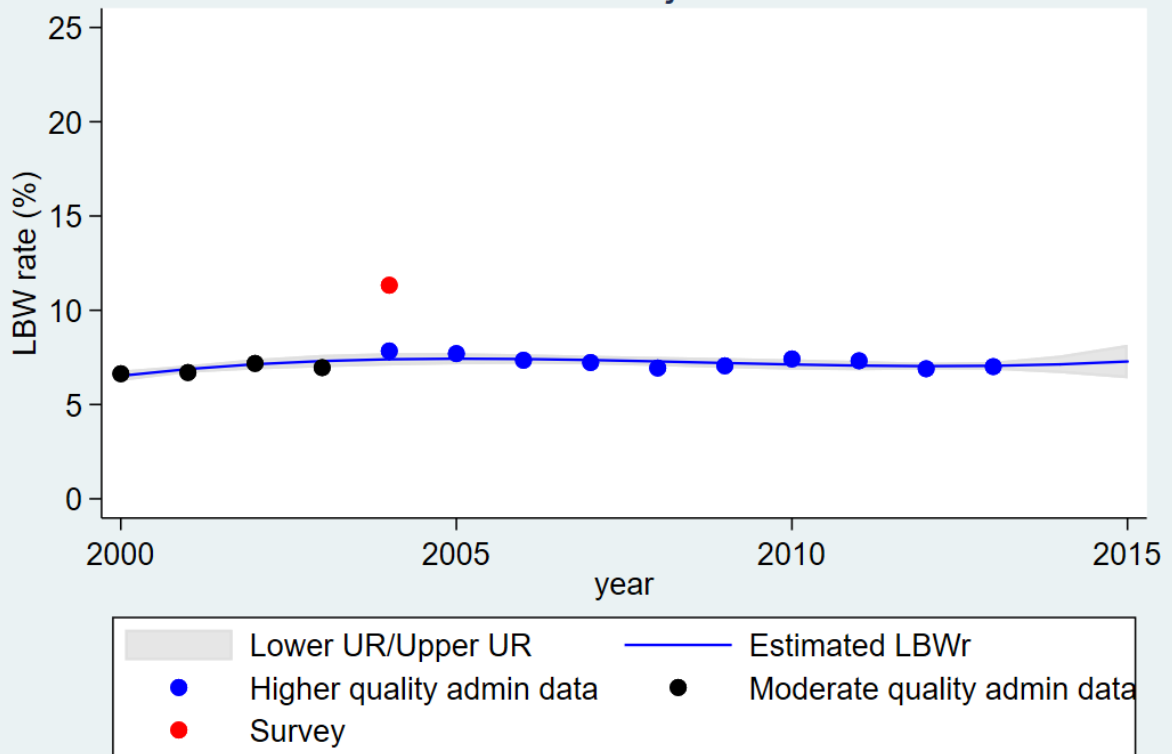

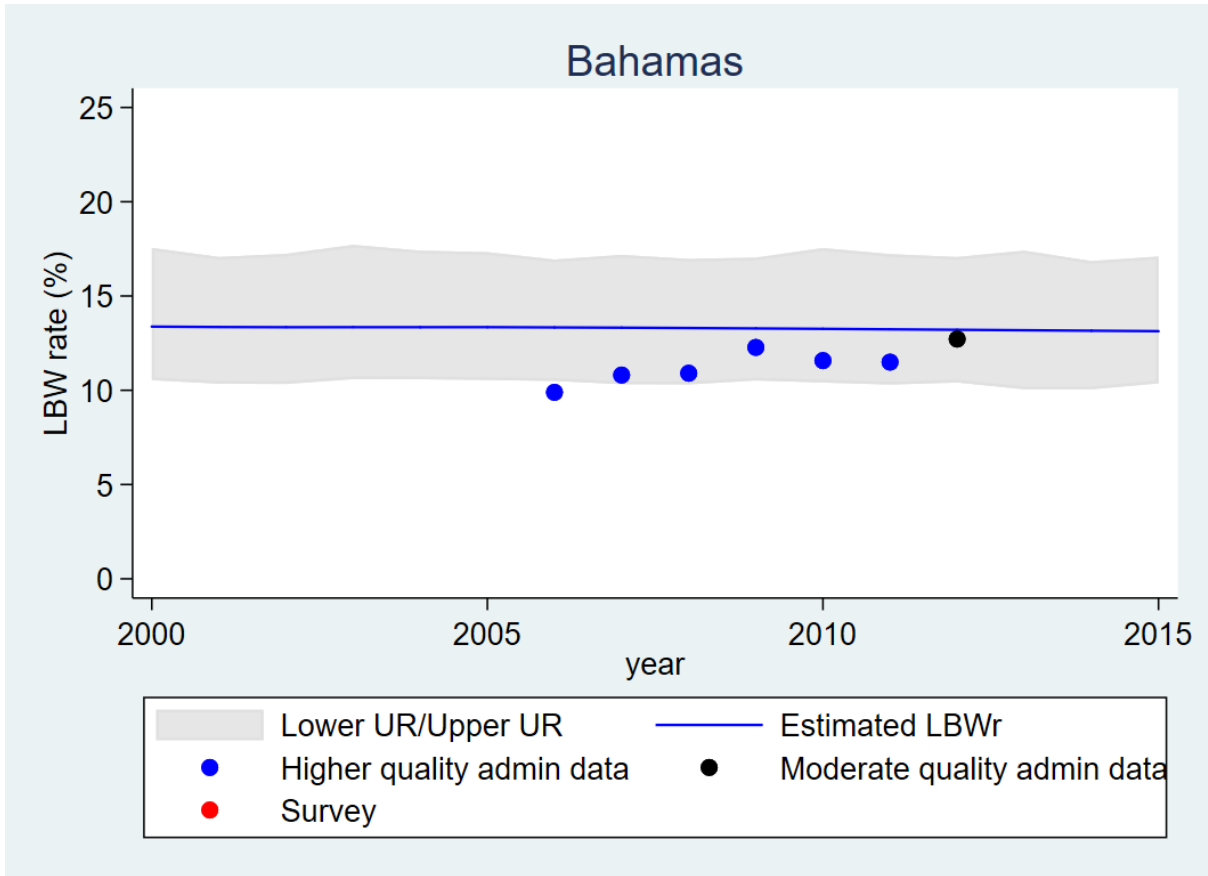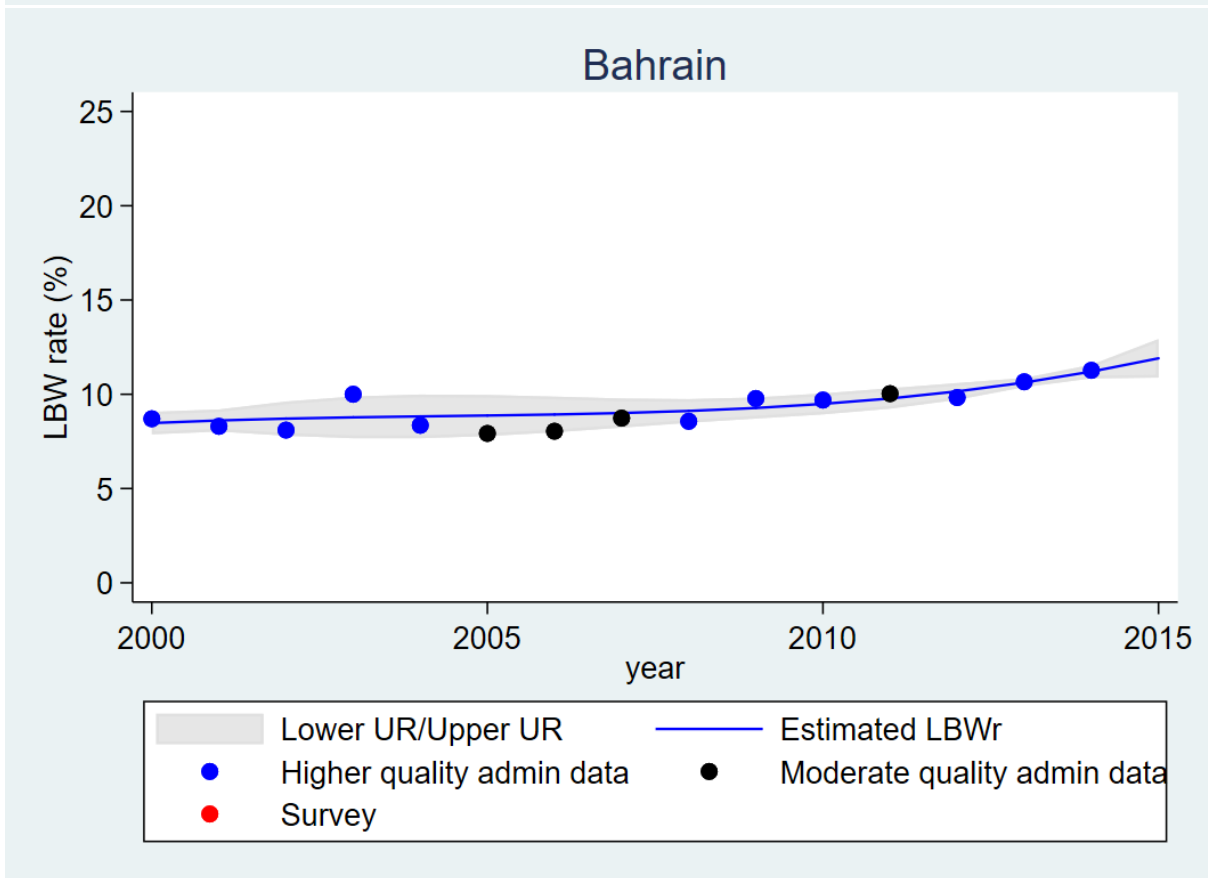

### Bangladesh

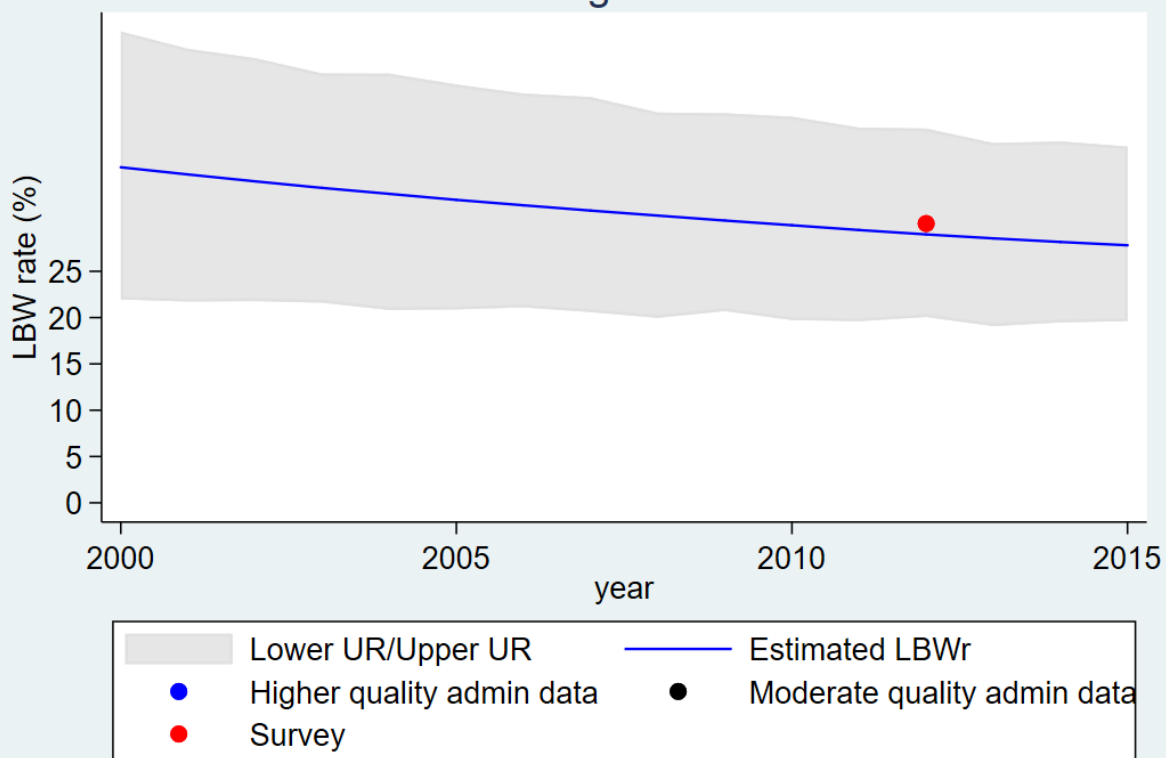

### Belarus

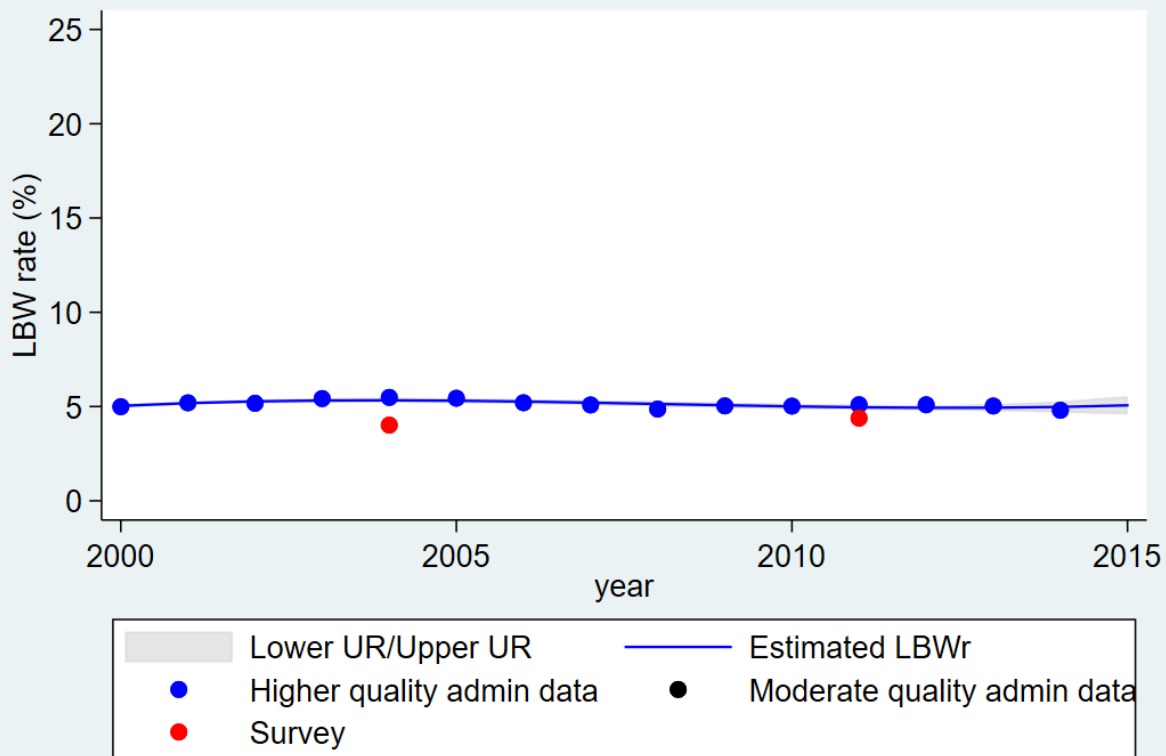

### Belgium

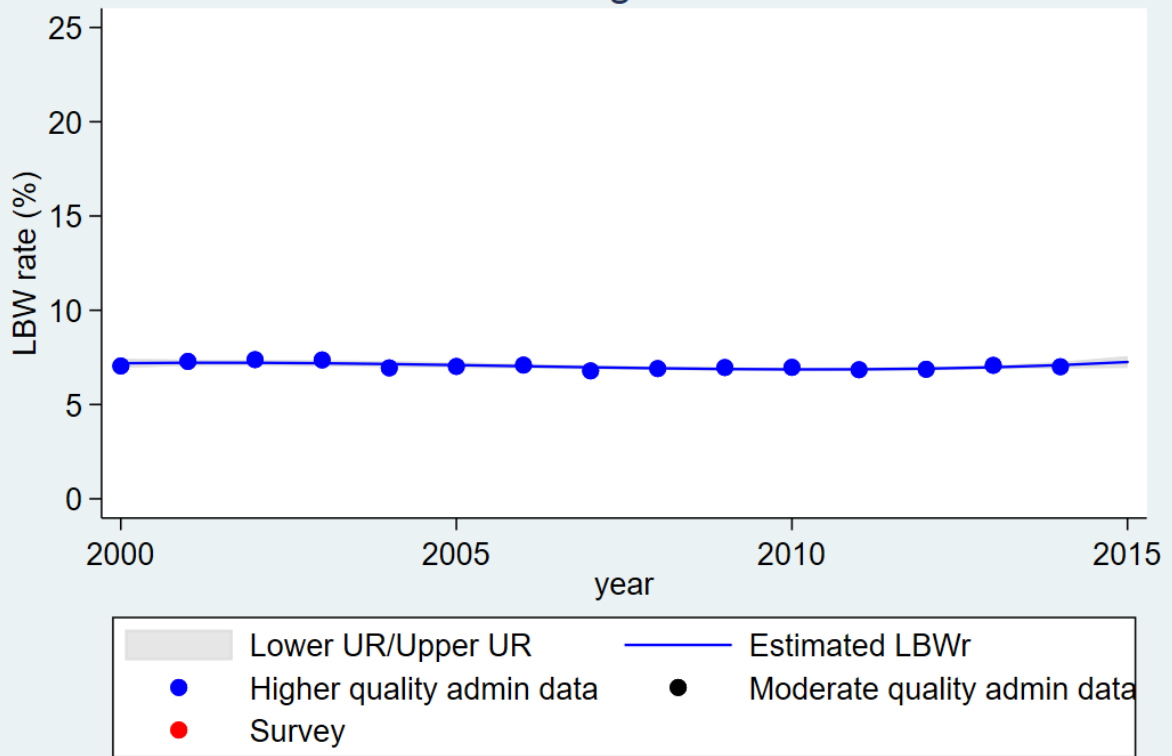

### Belize

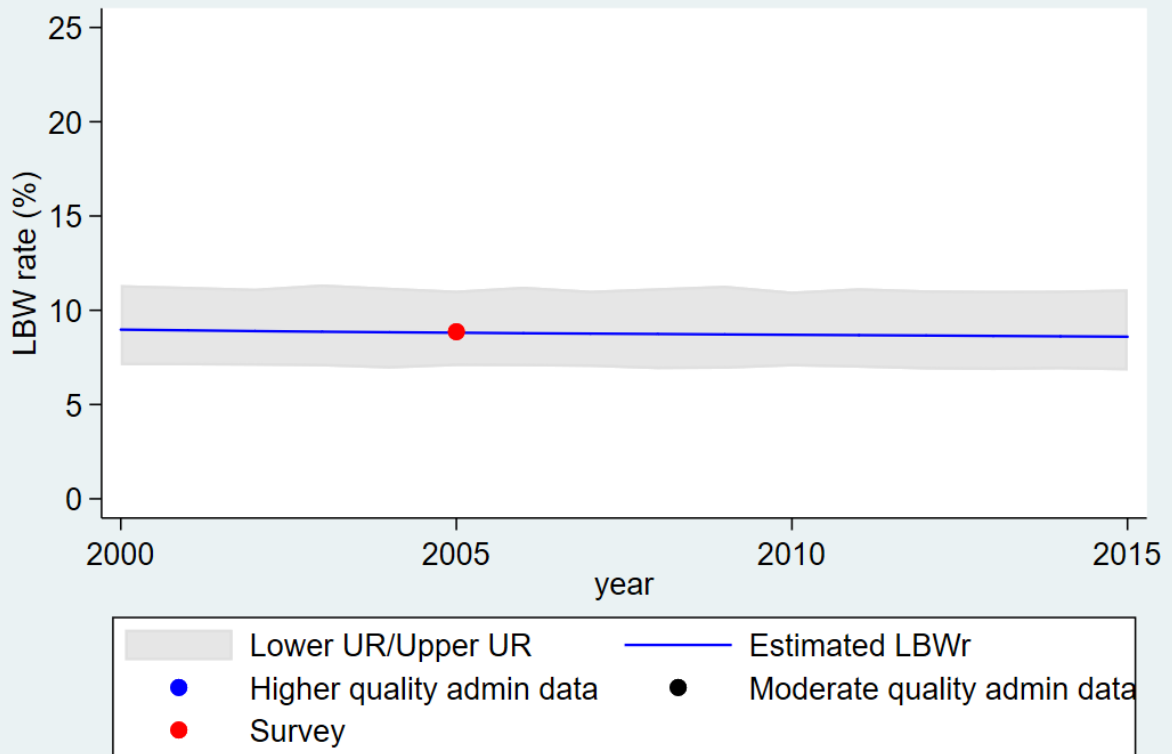



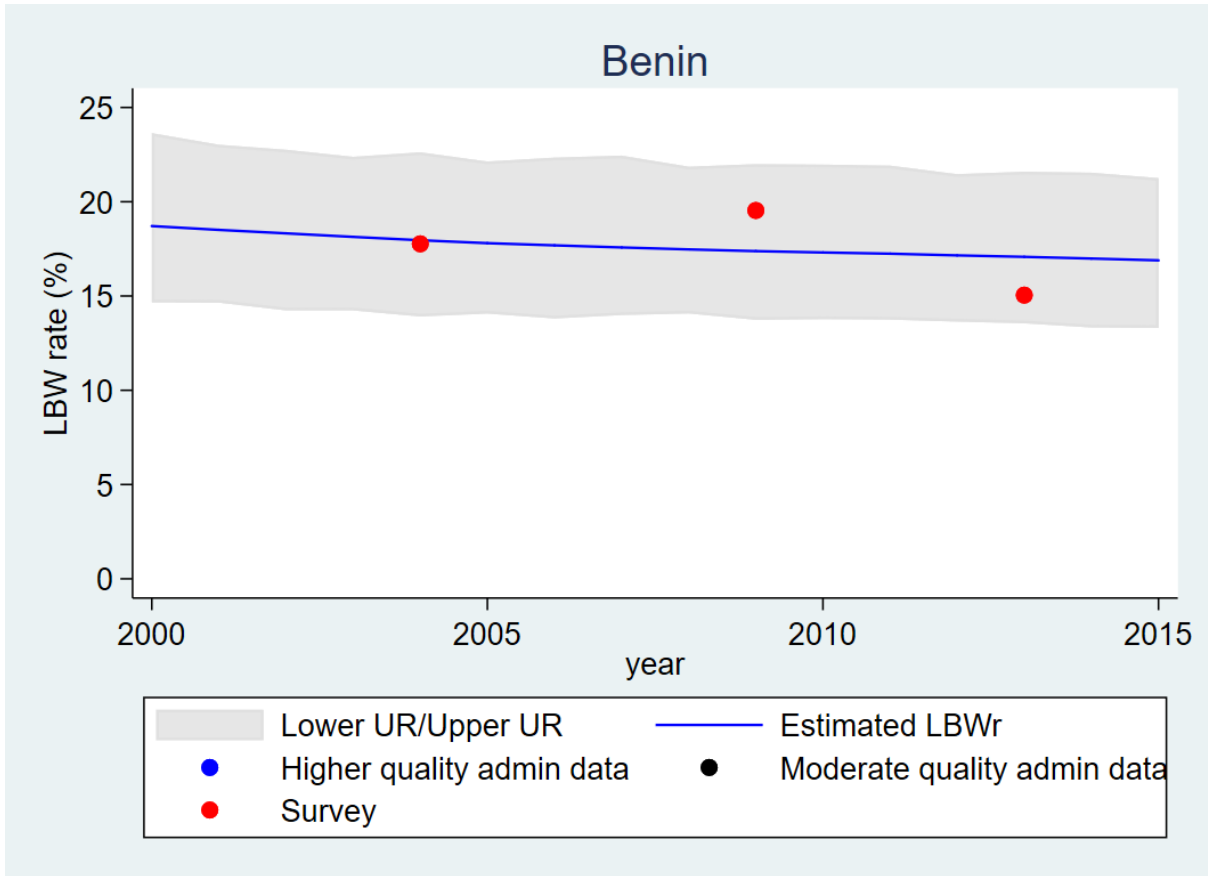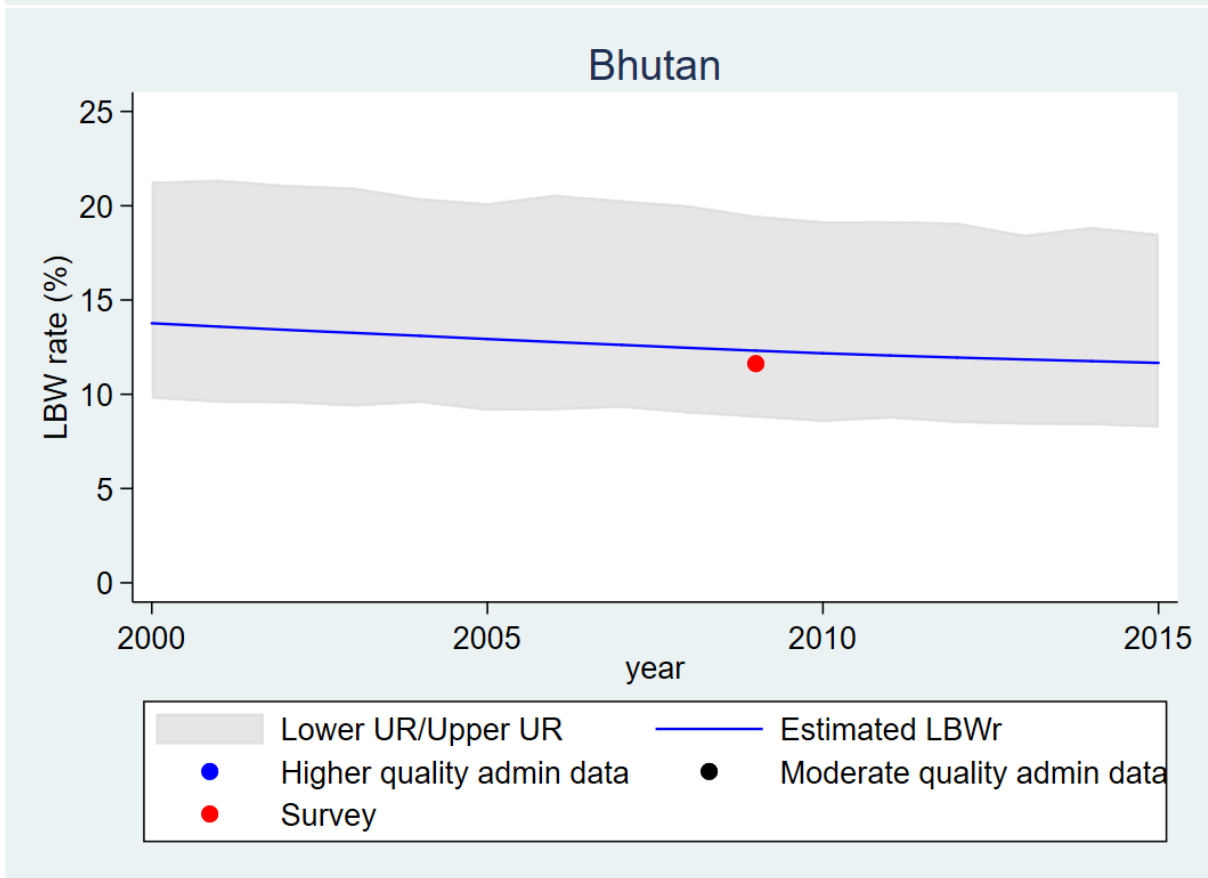

### Bolivia (Plurinational State of)

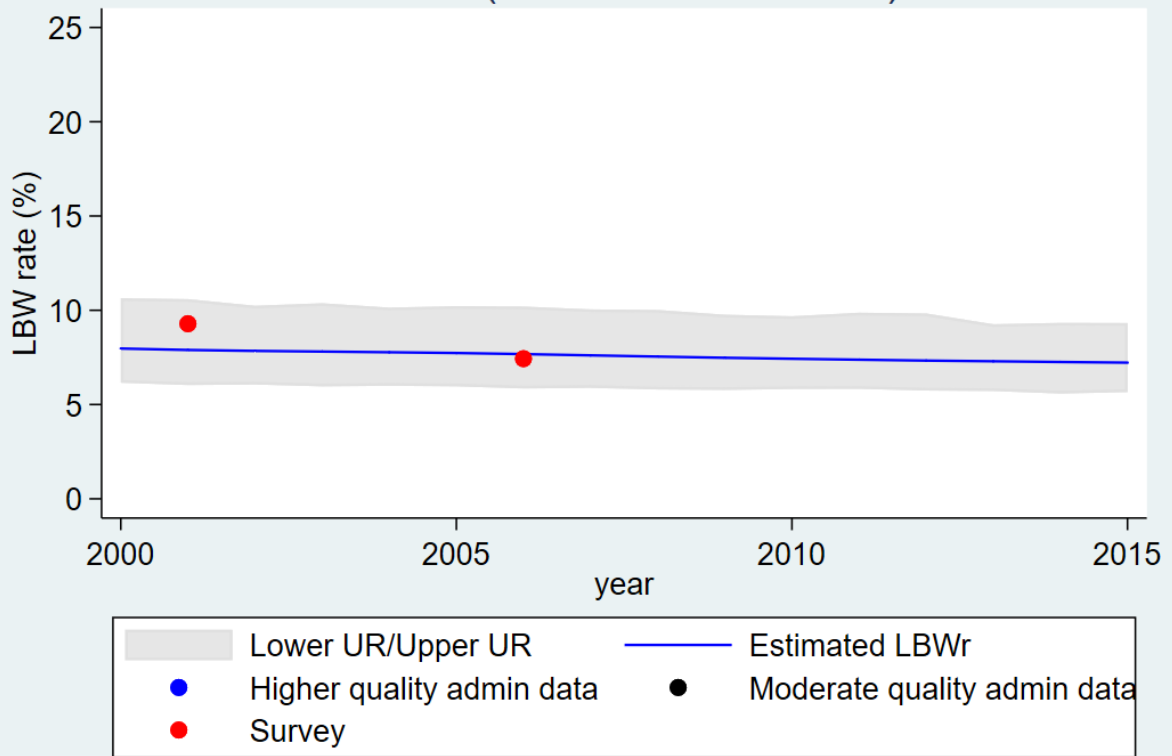

### Bosnia and Herzegovina

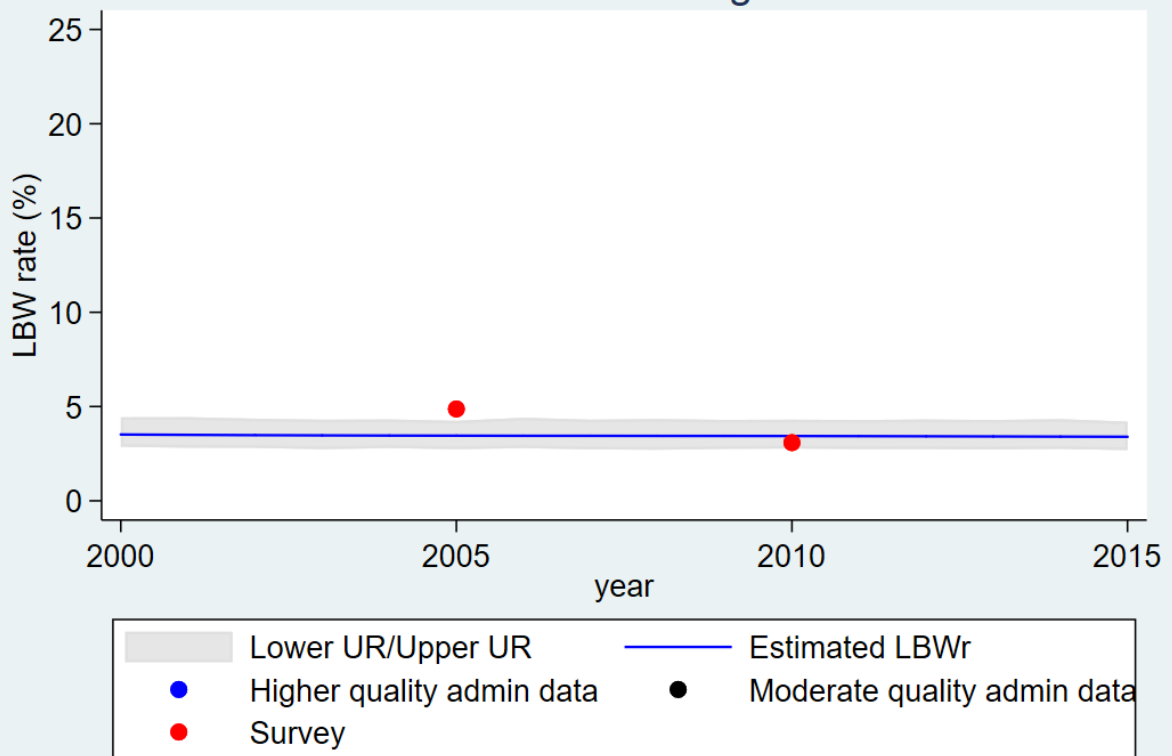

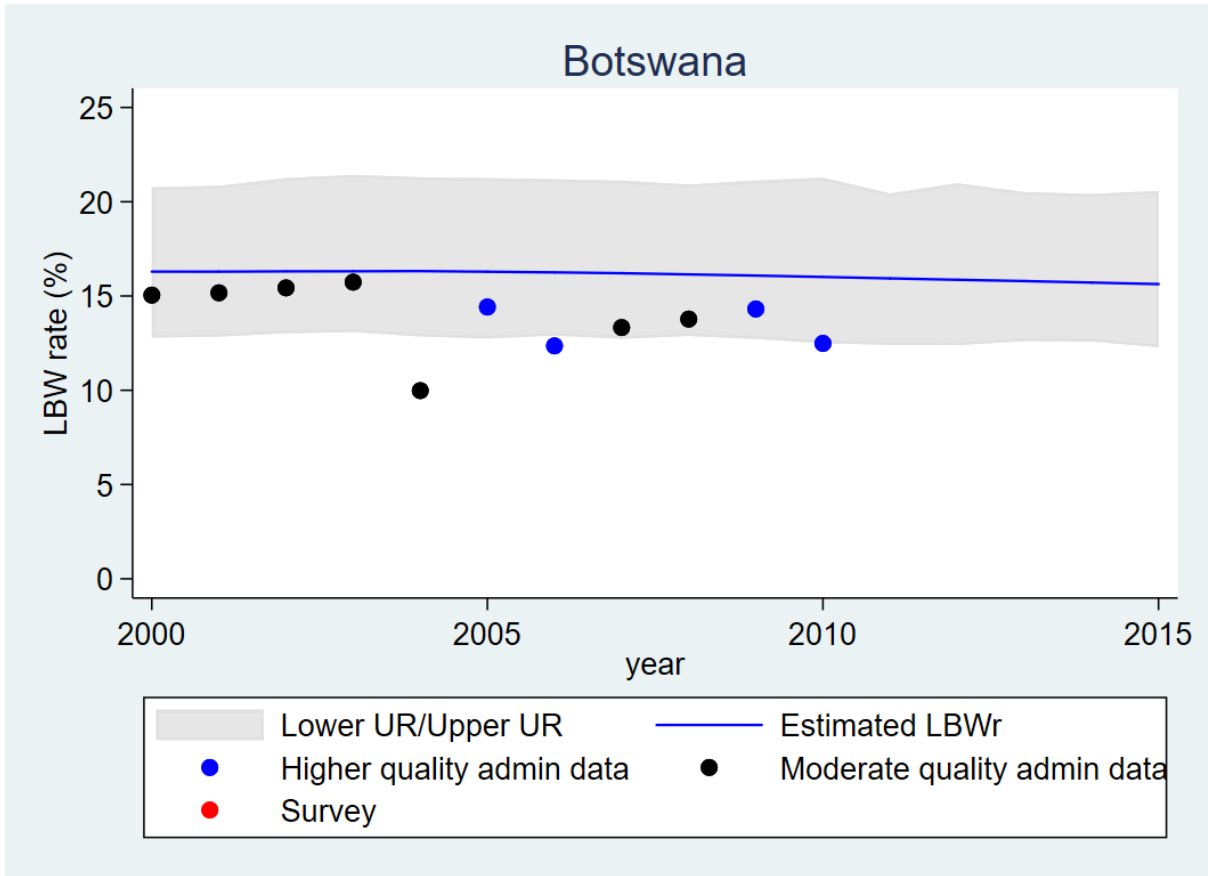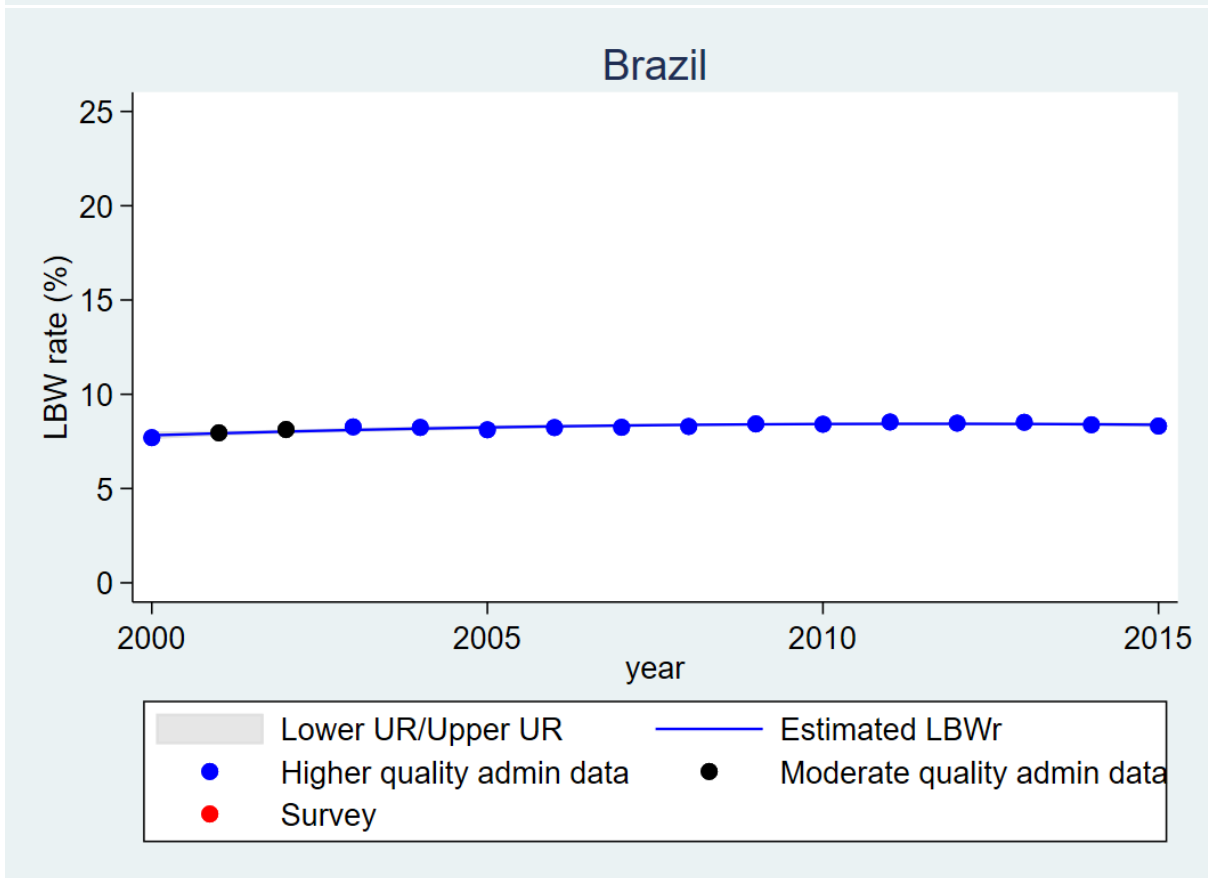

### Brunei Darussalam

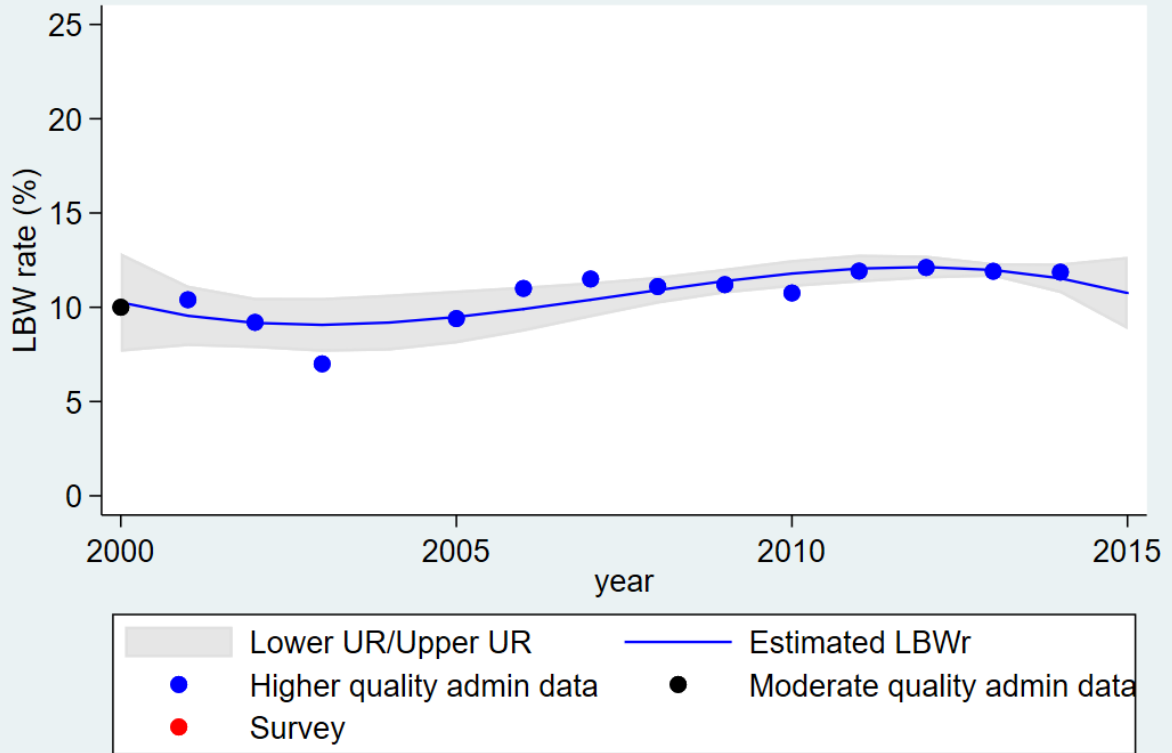

### Bulgaria

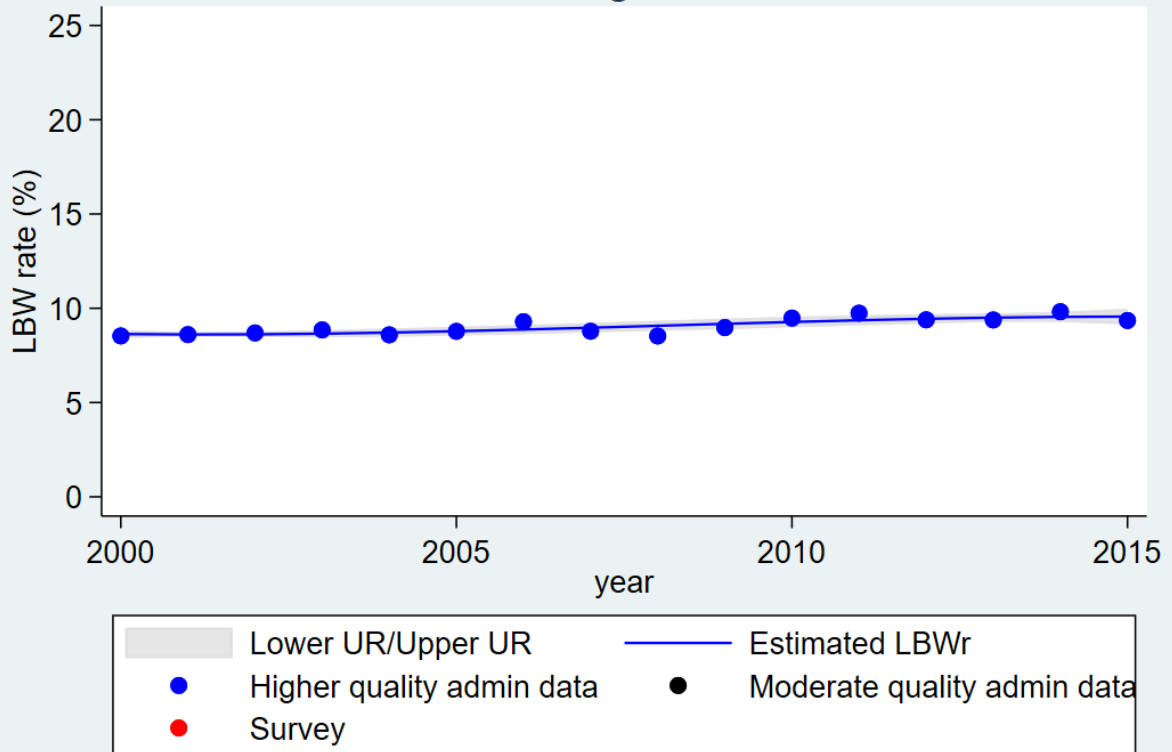

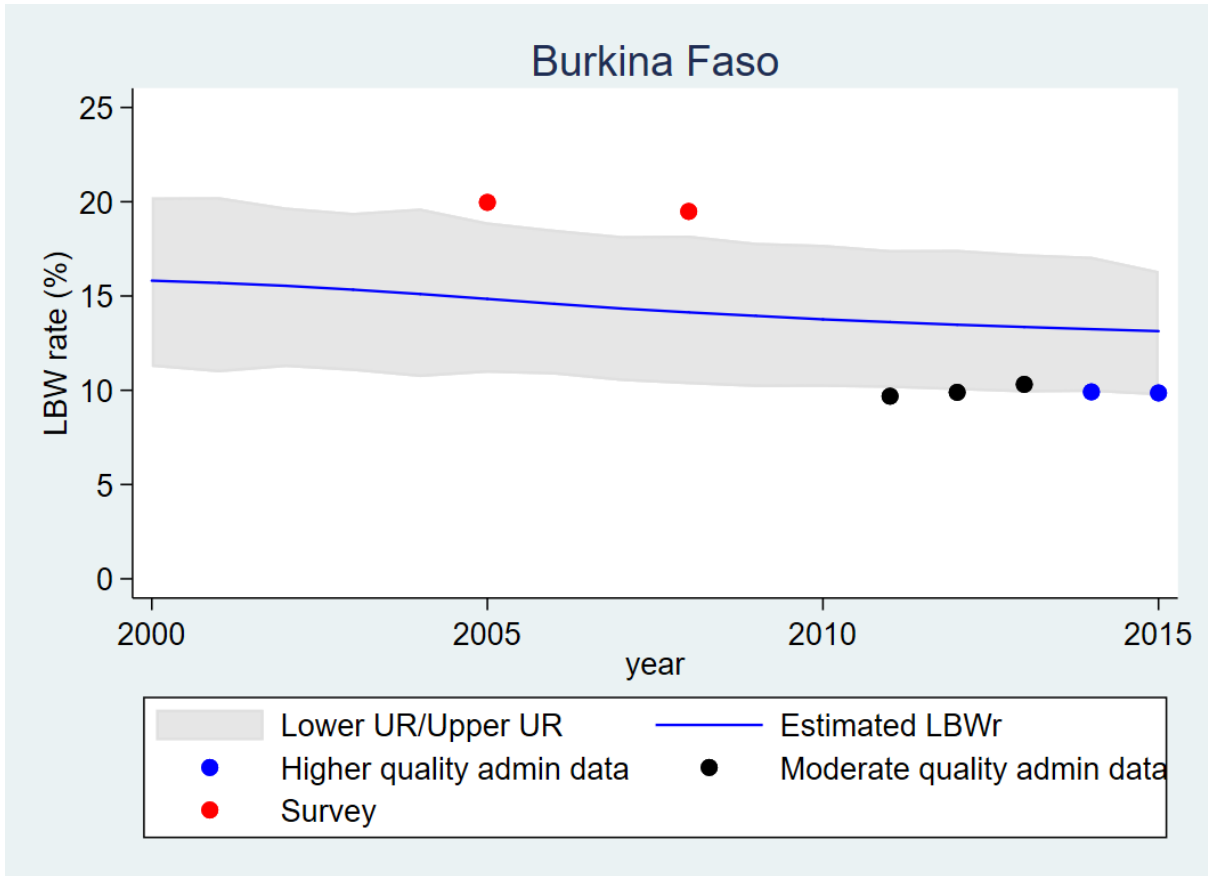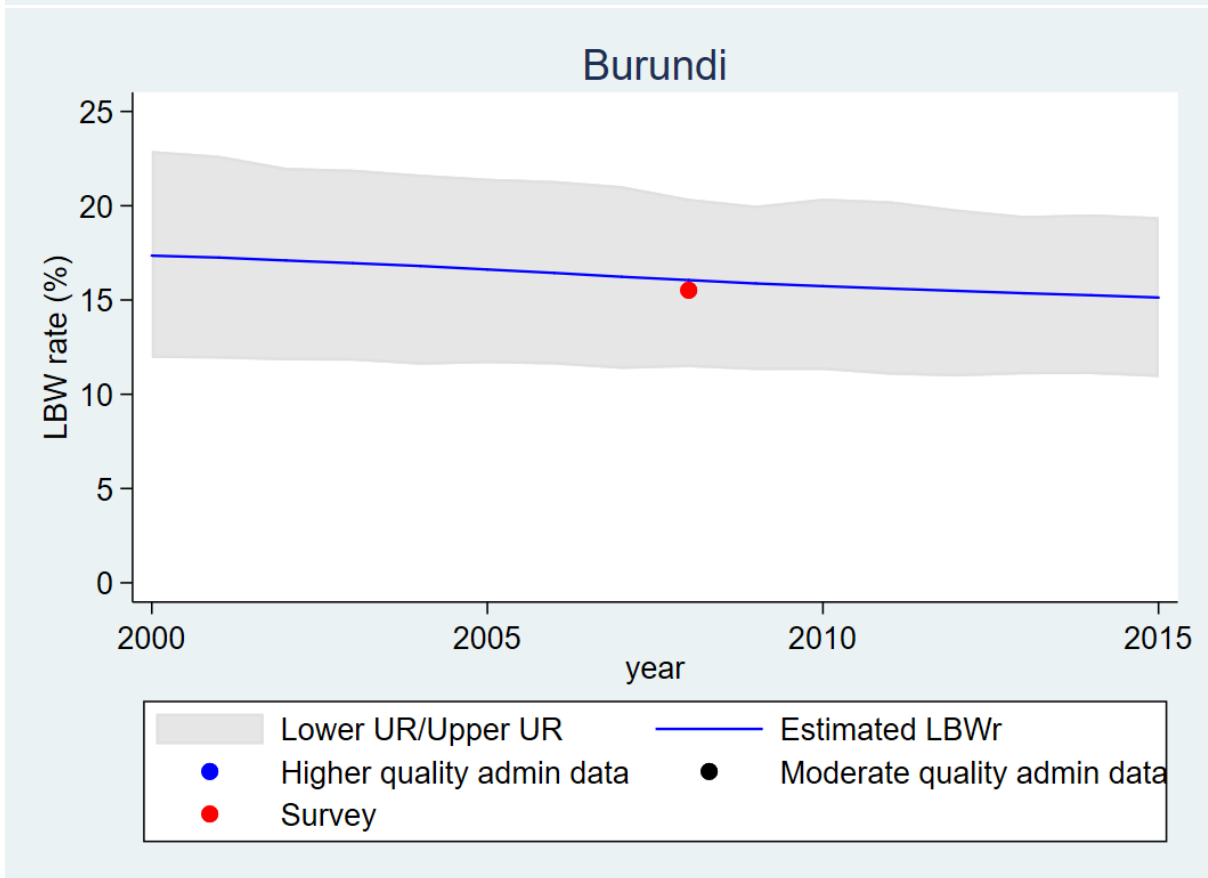

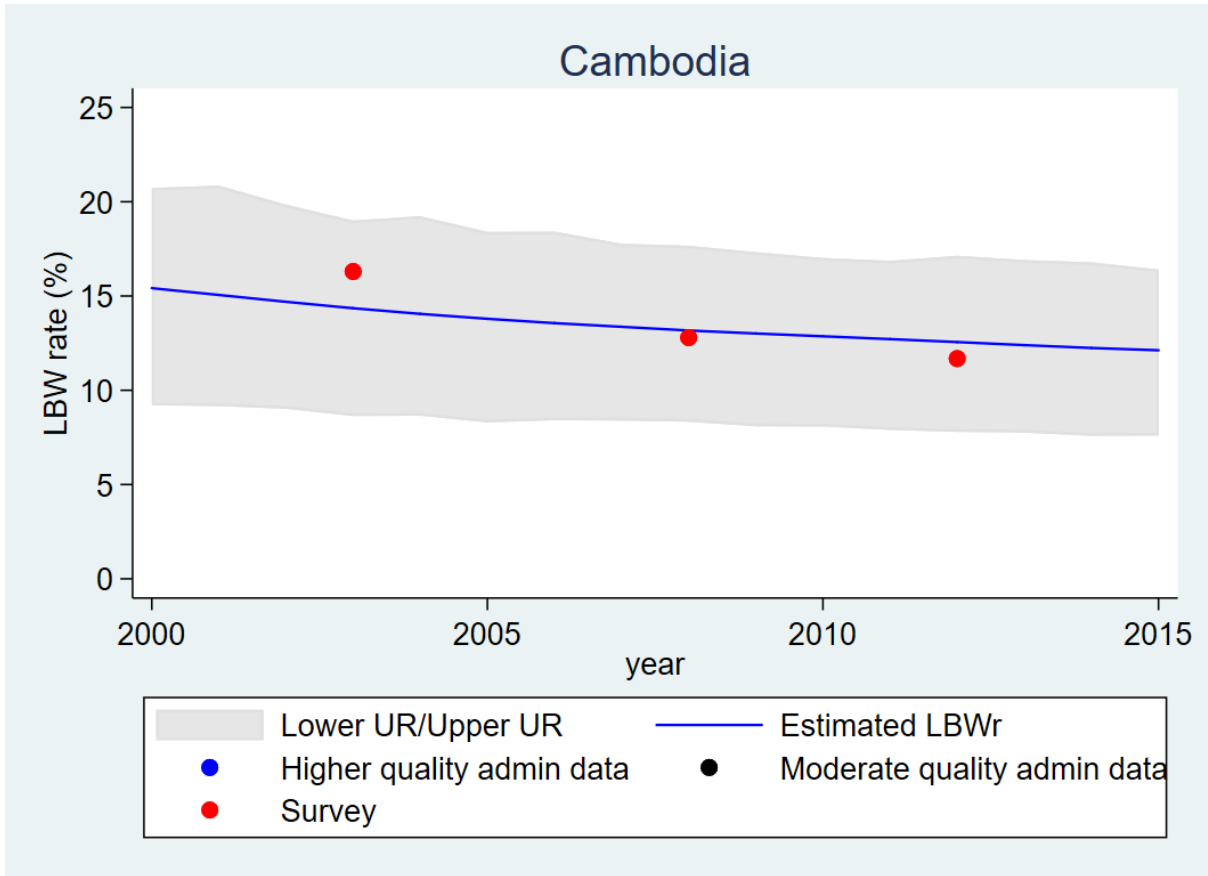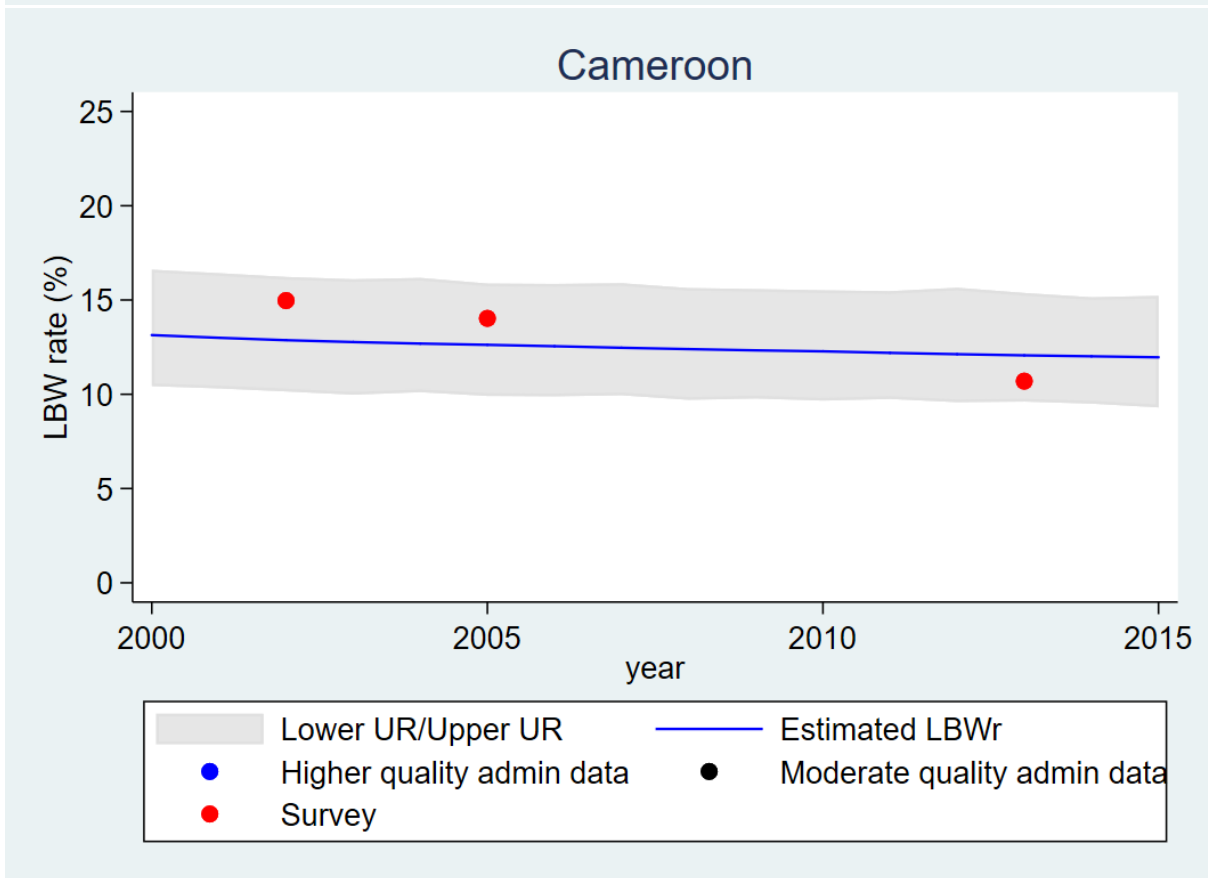

### Canada

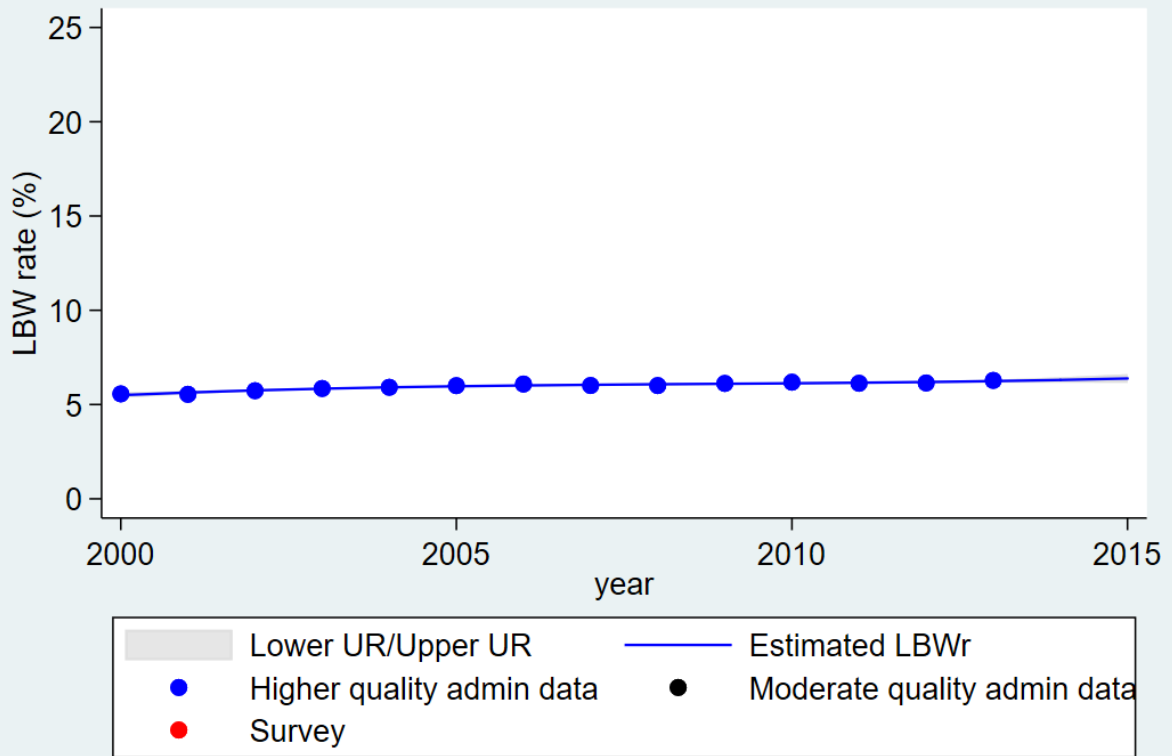

### Central African Republic

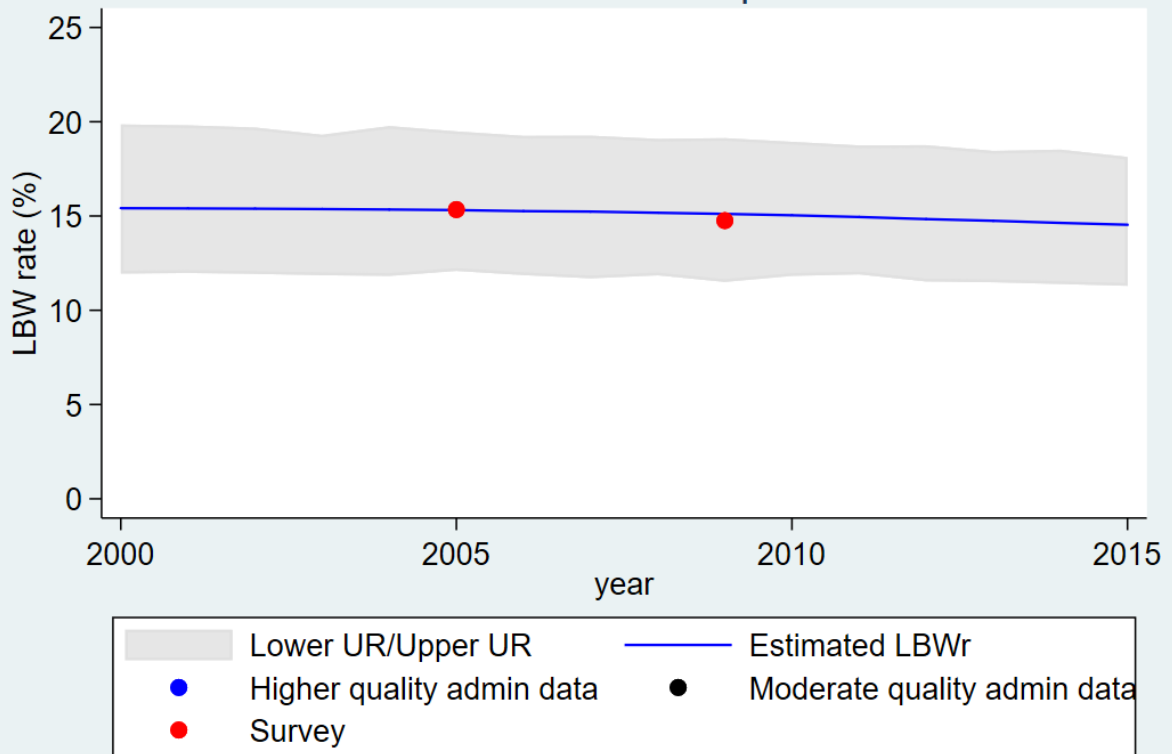

### Chile

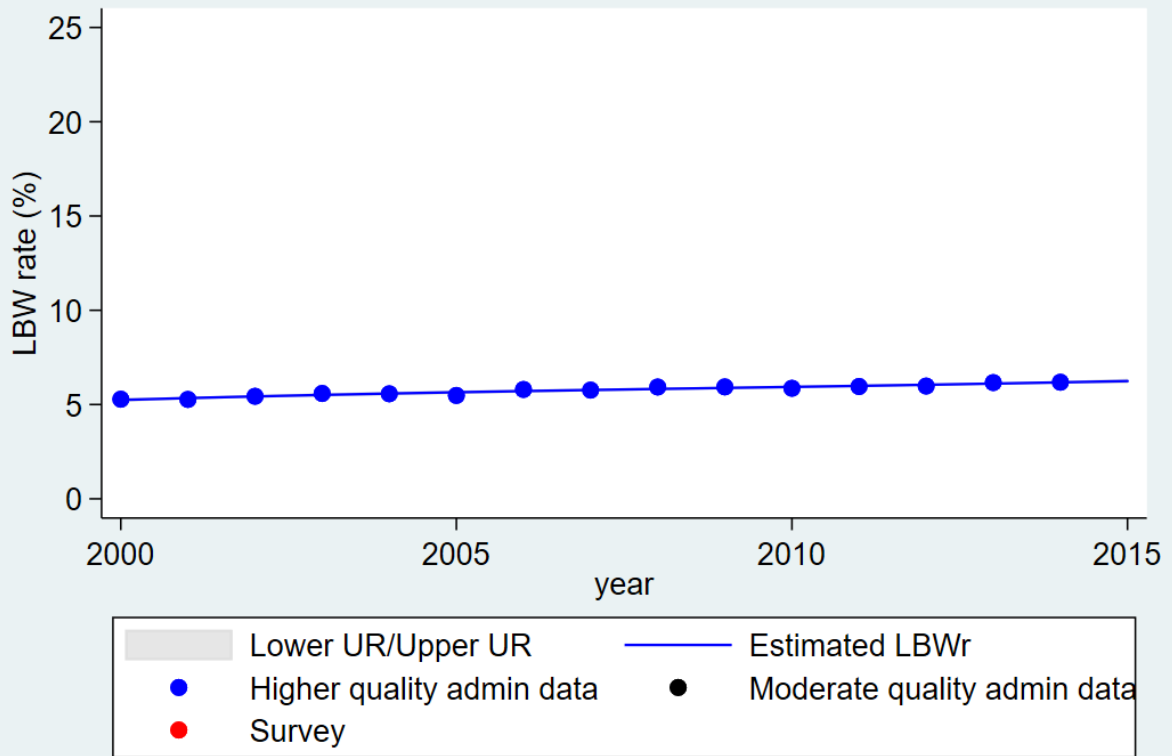

### China

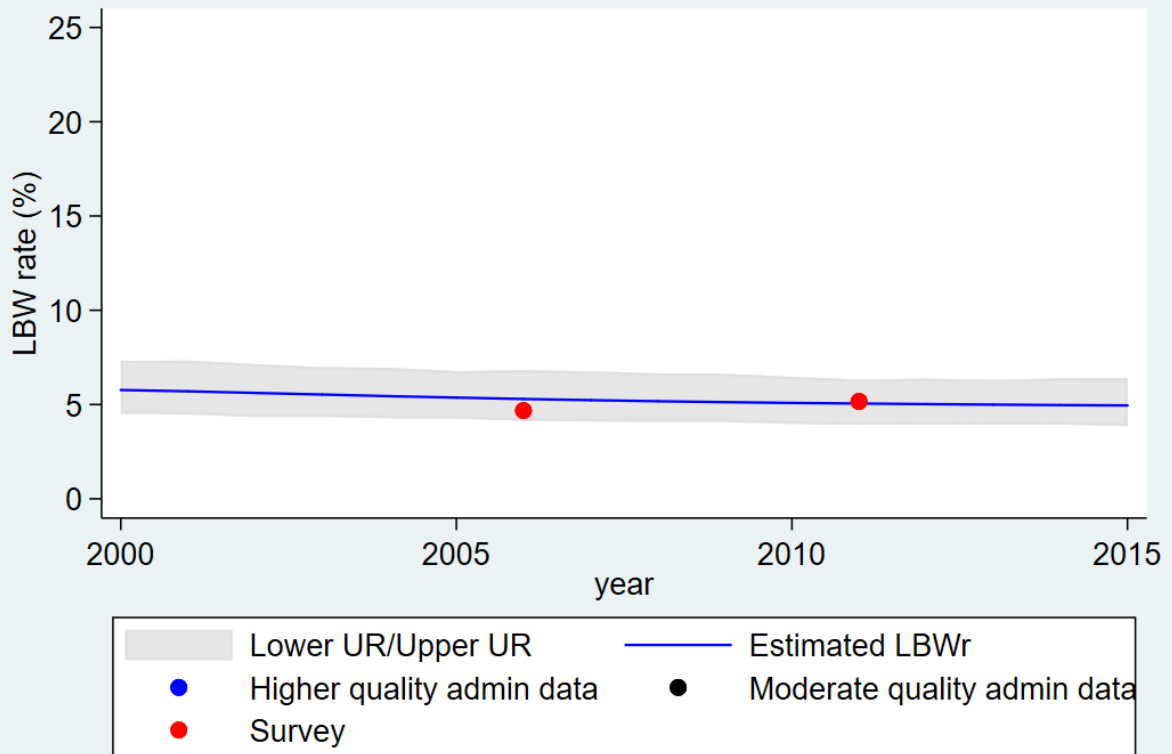



### Colombia

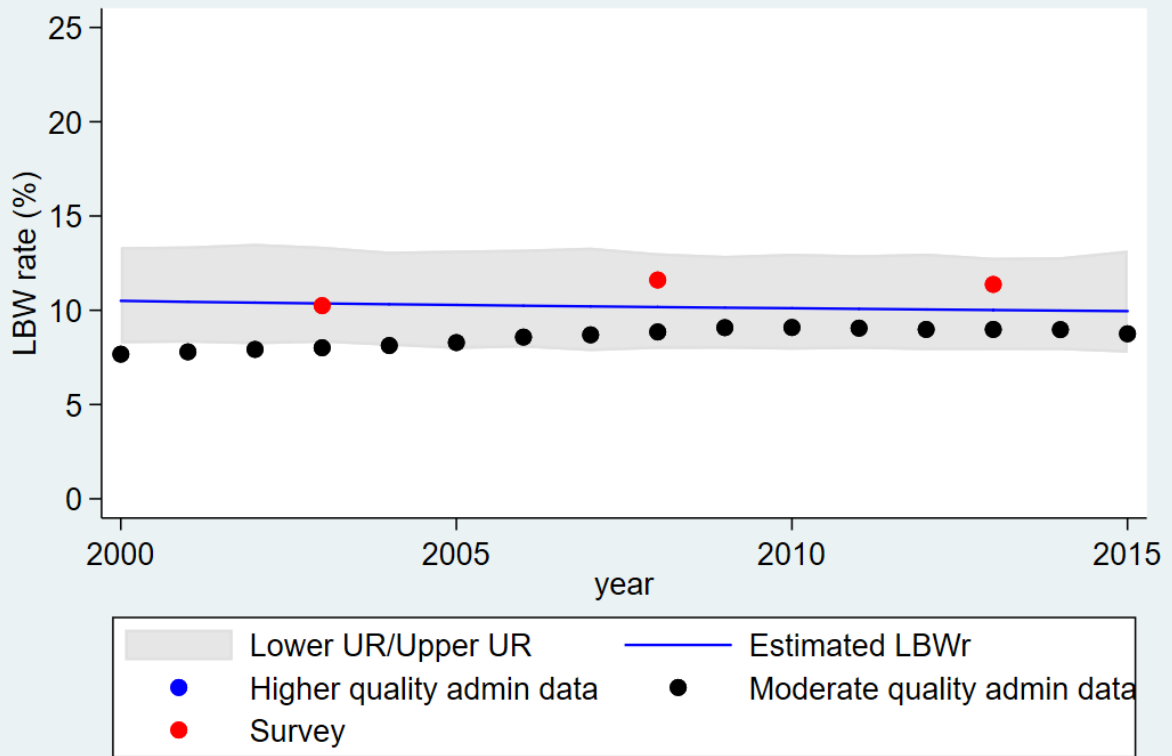

### Comoros

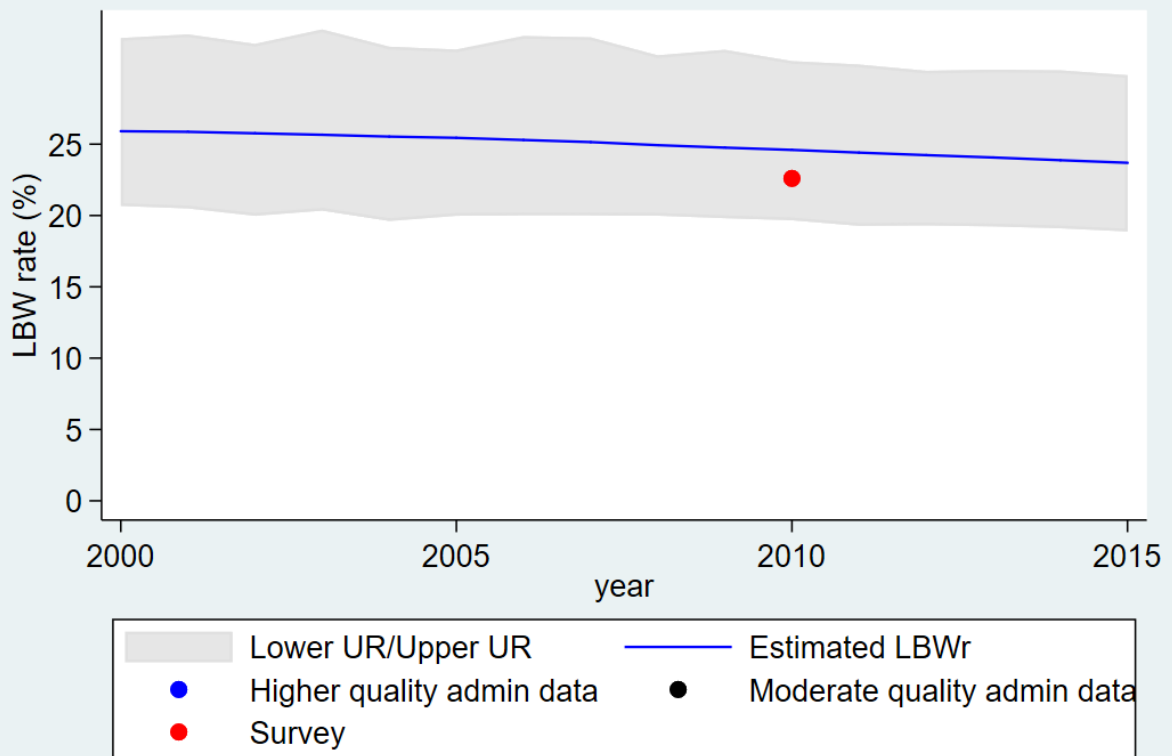

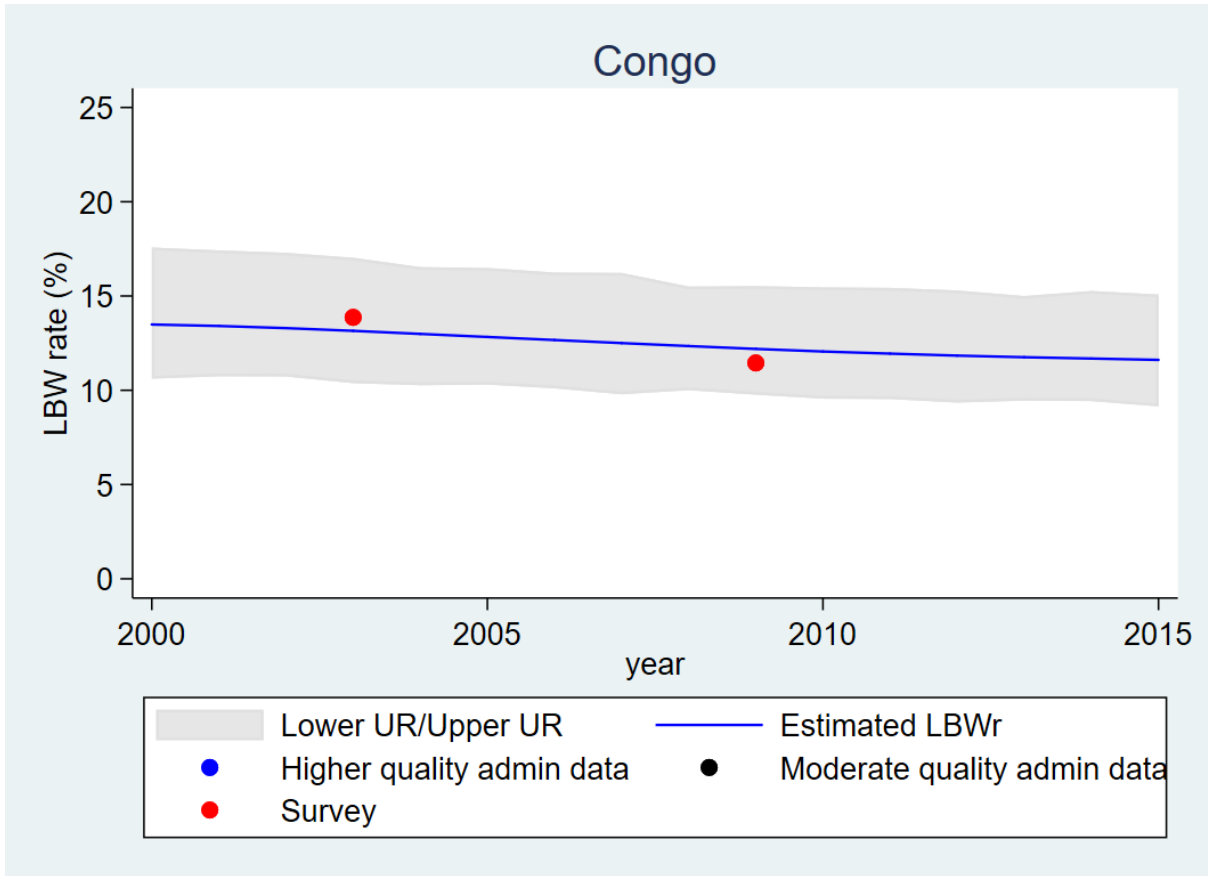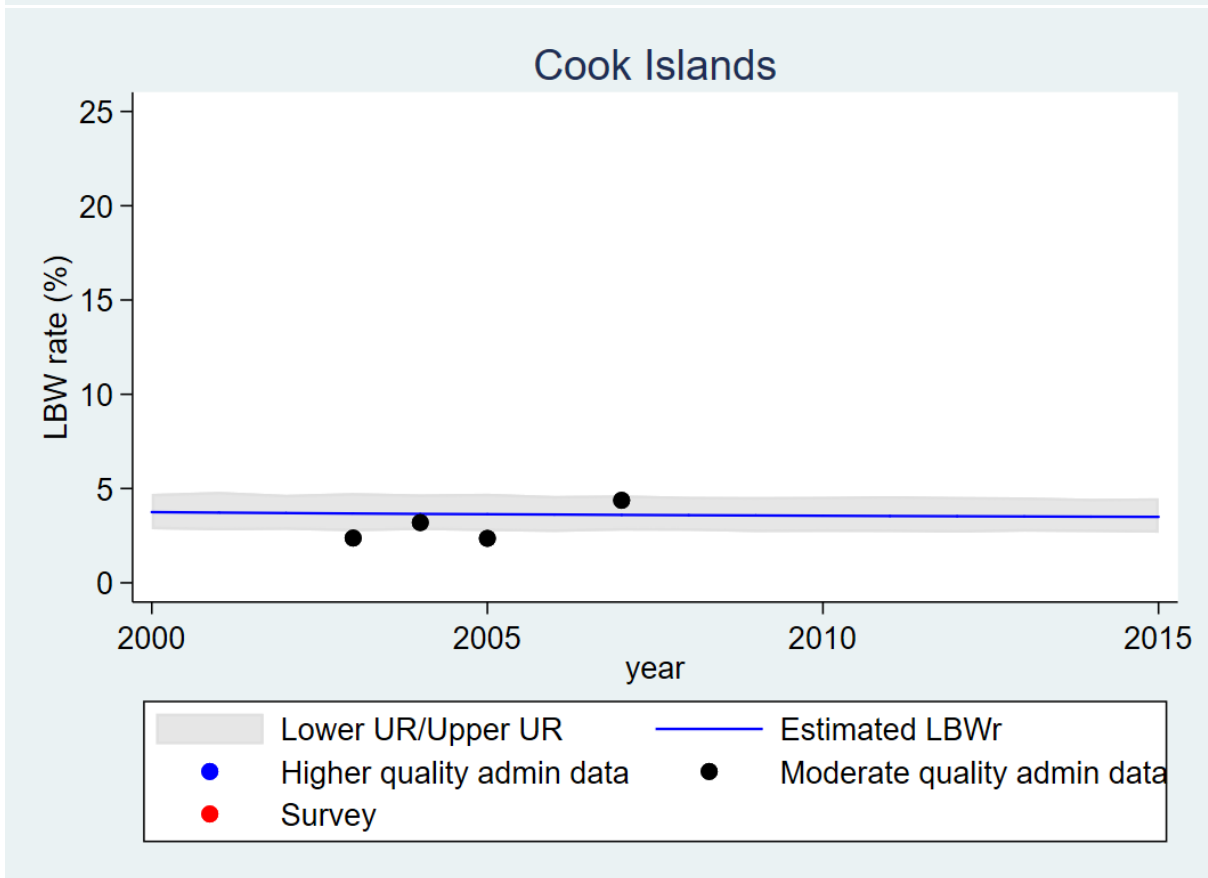

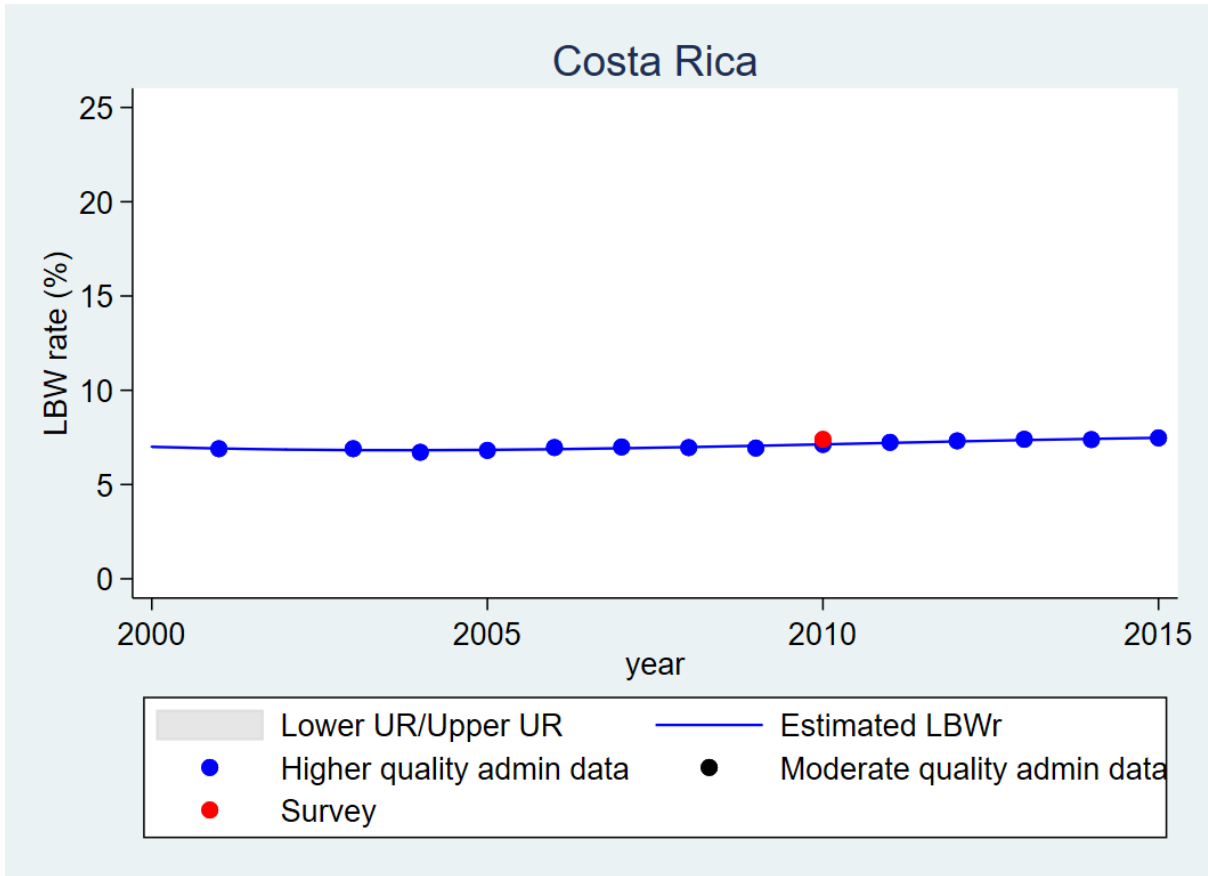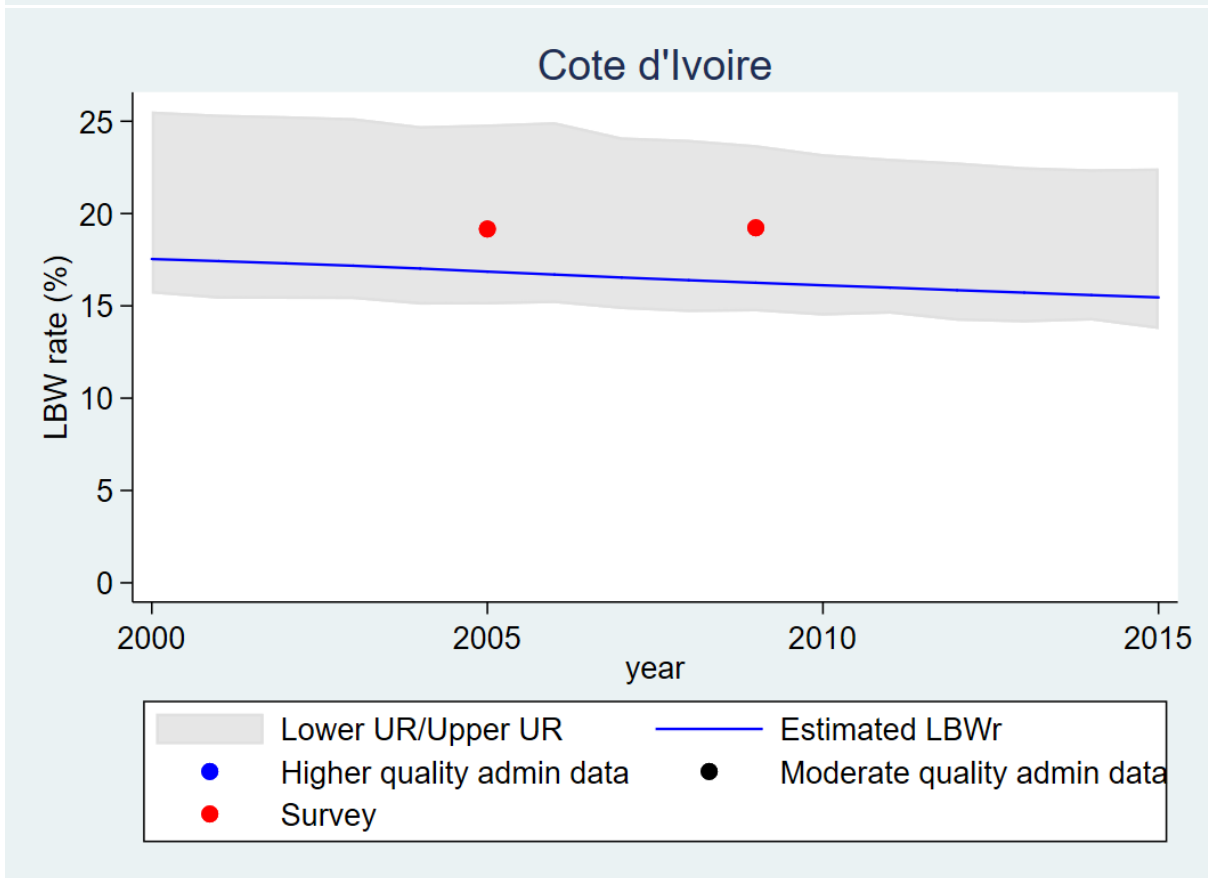

### Croatia

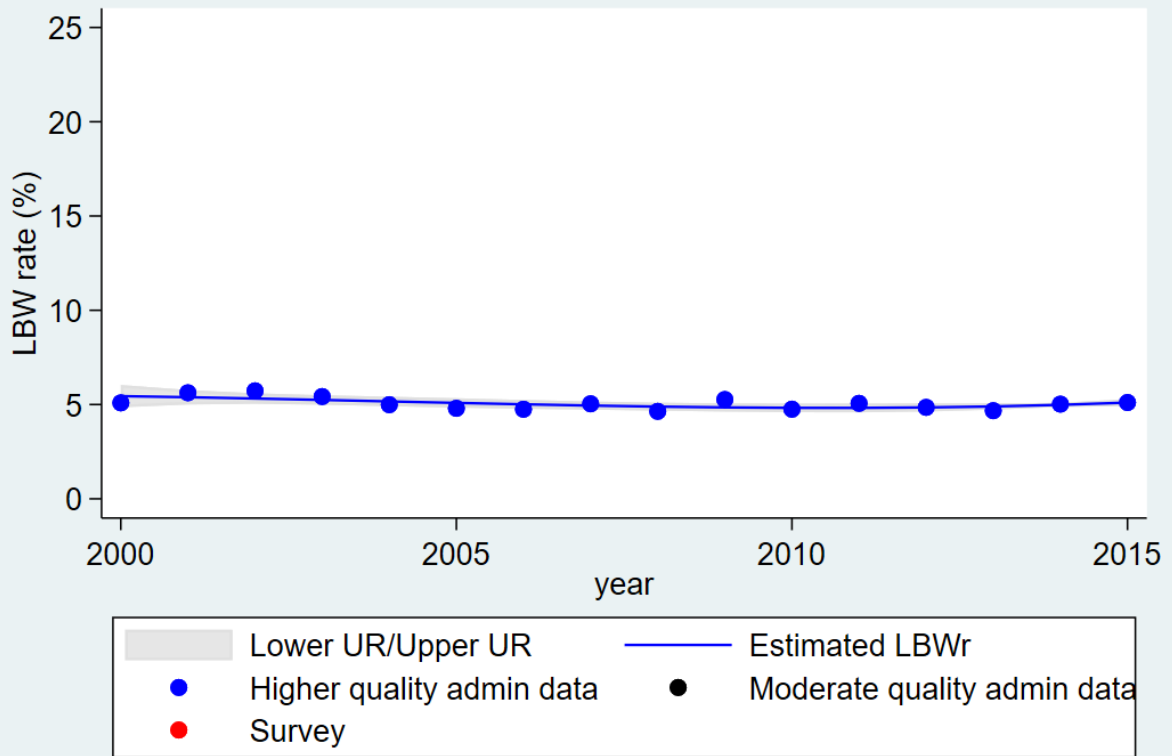

### Cuba

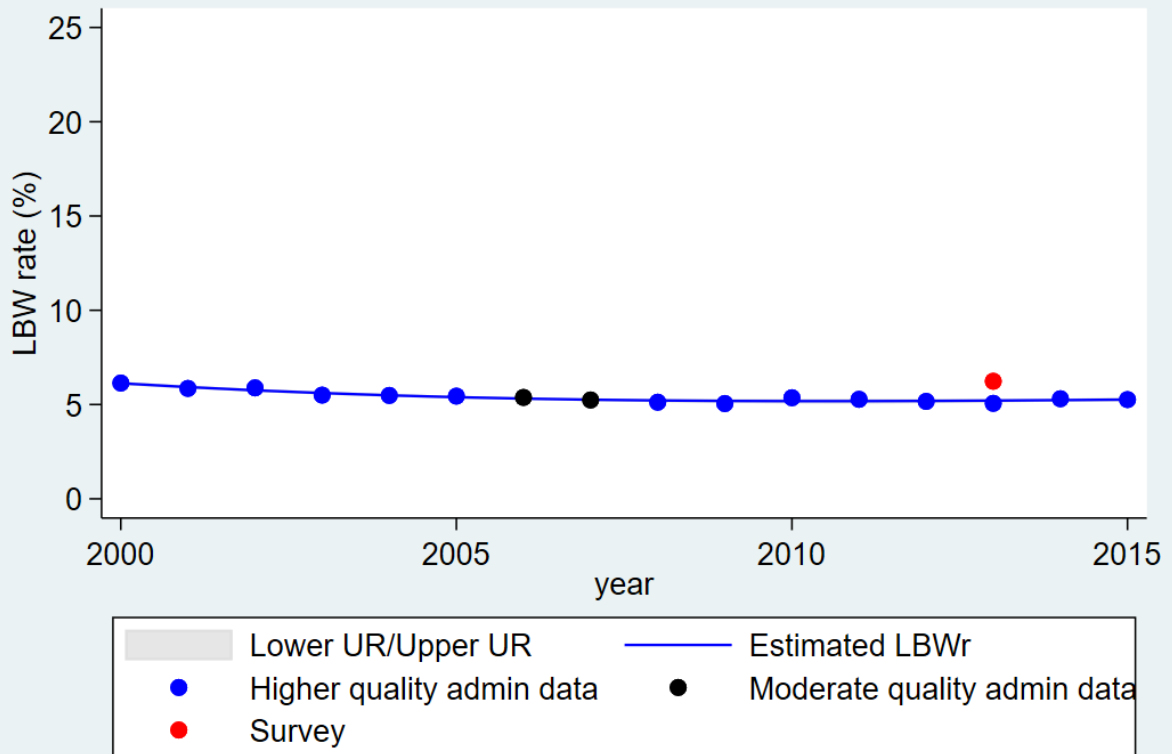

### Czechia

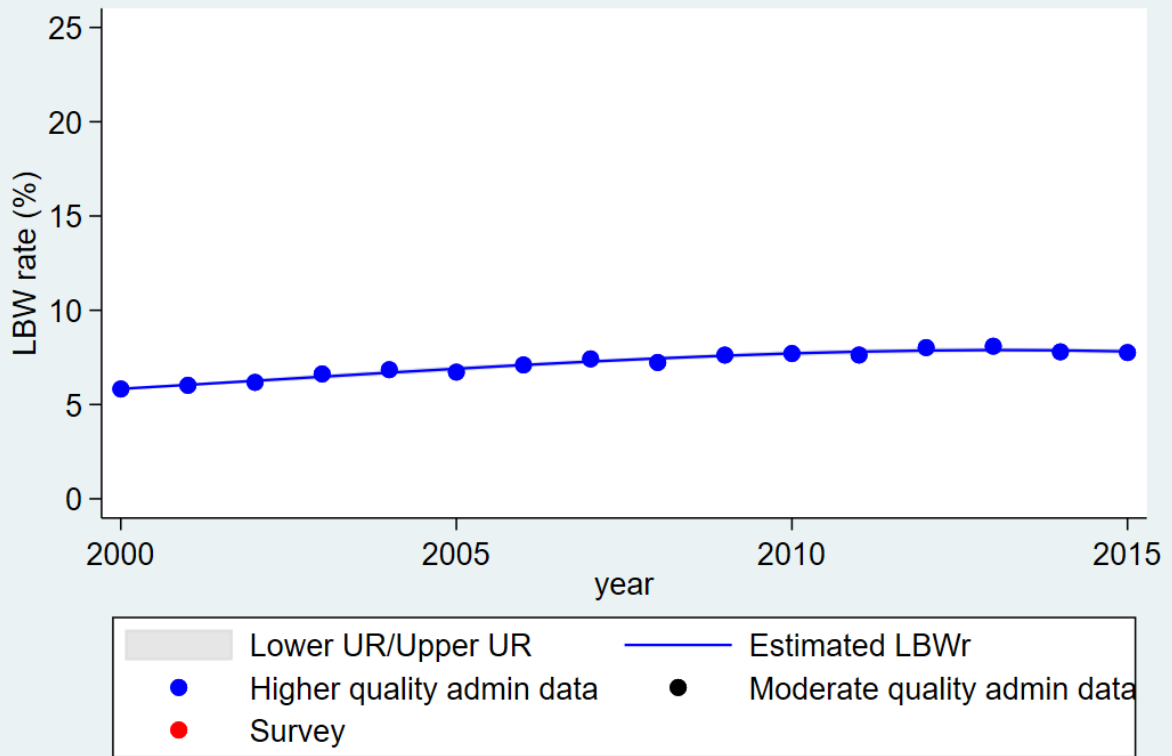

### Democratic Republic of the Congo

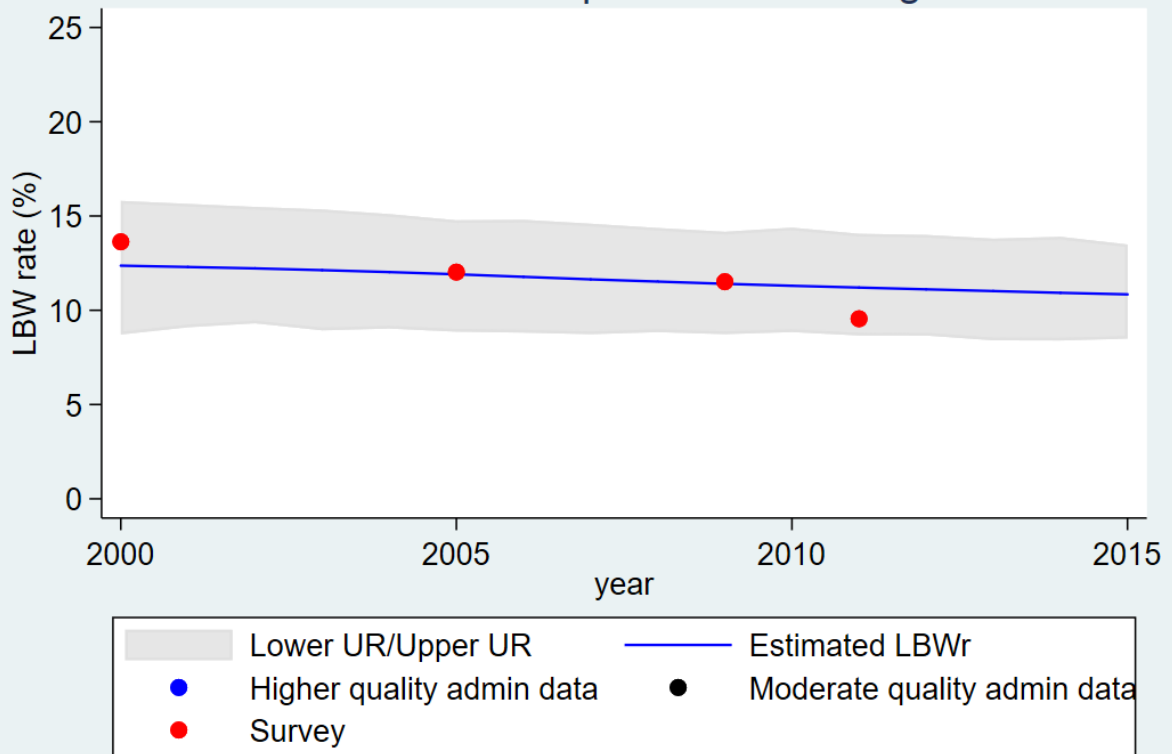

## Denmark

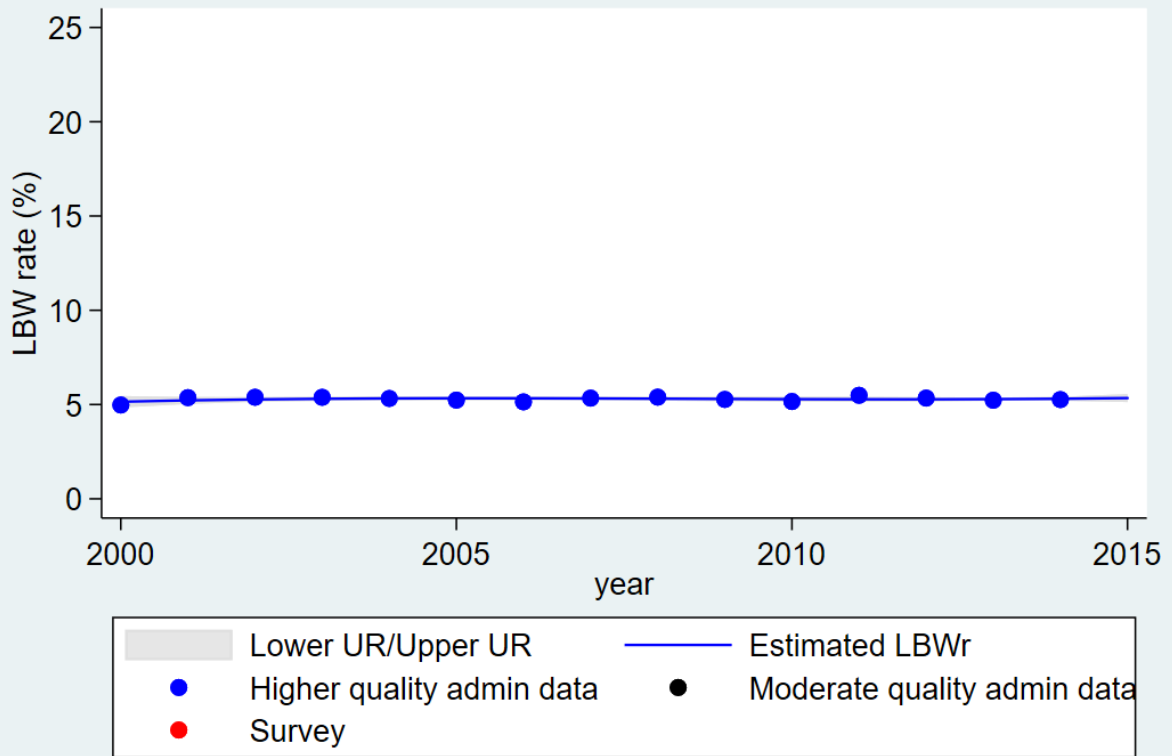

## Dominican Republic

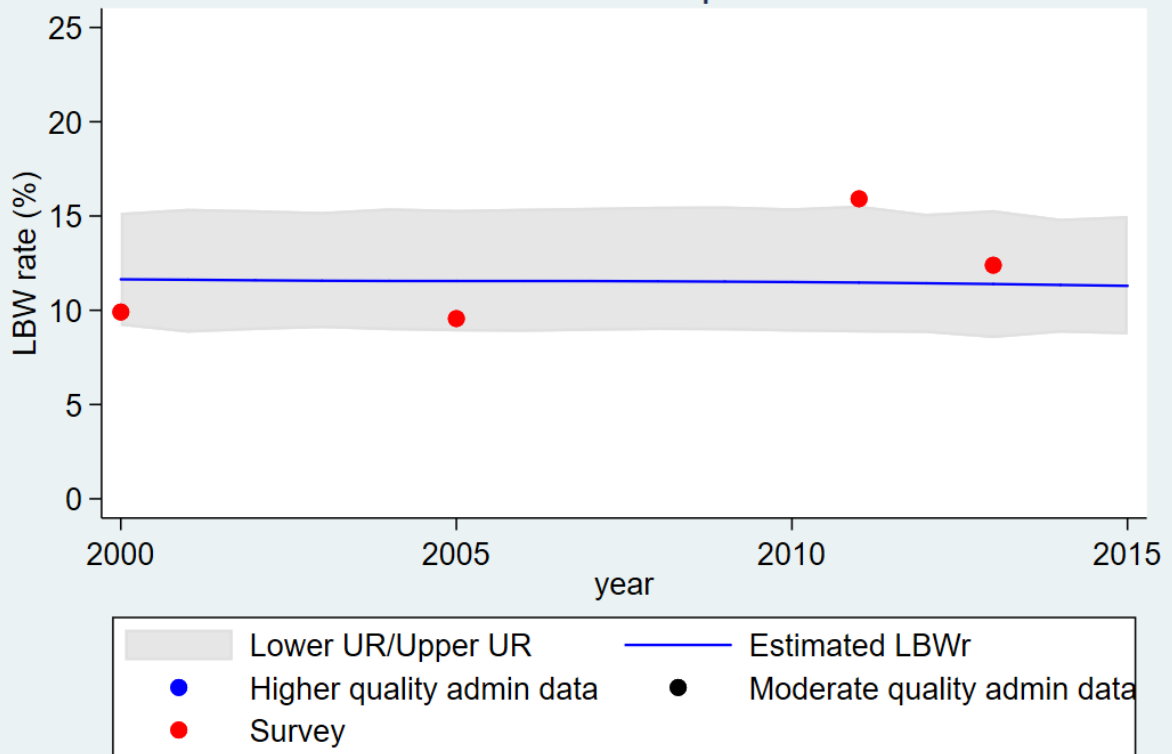

### Ecuador

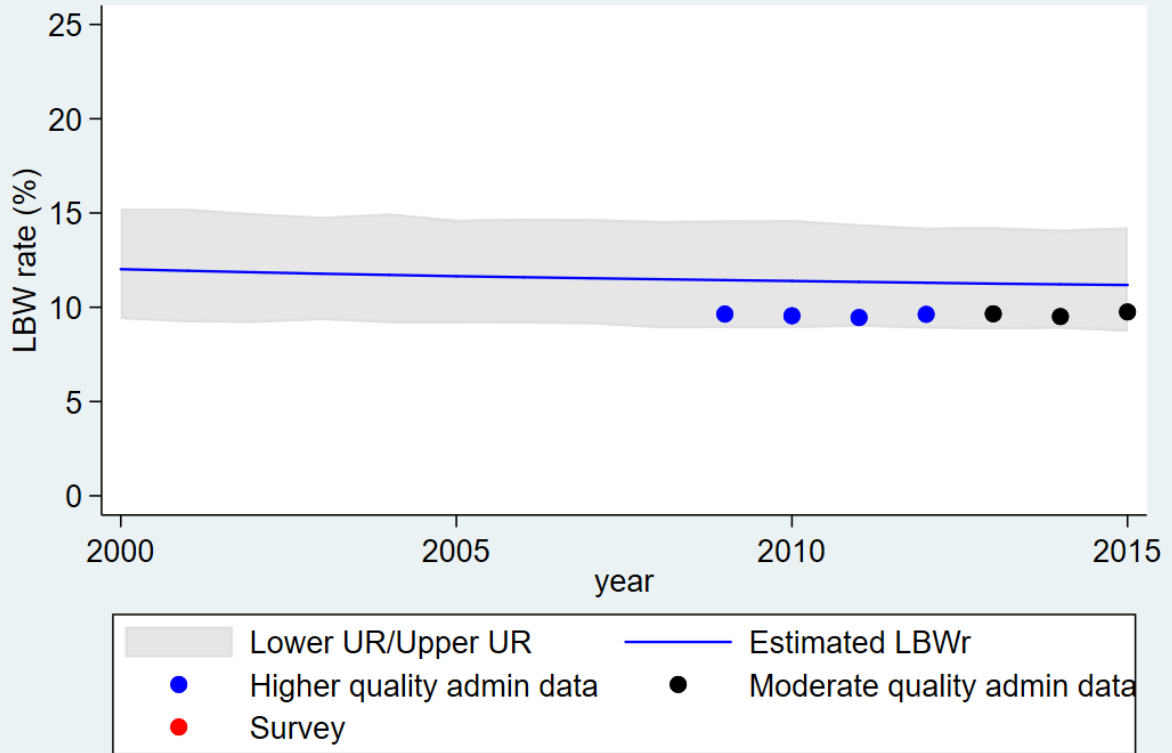

### El Salvador

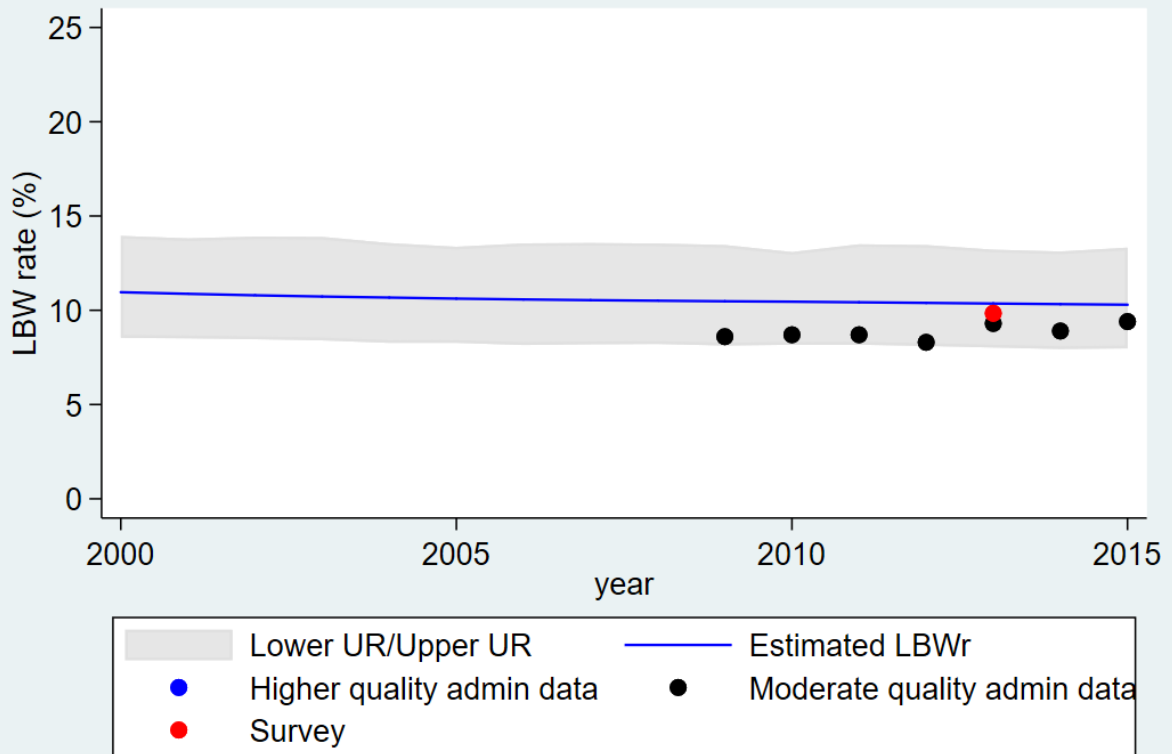

### Estonia

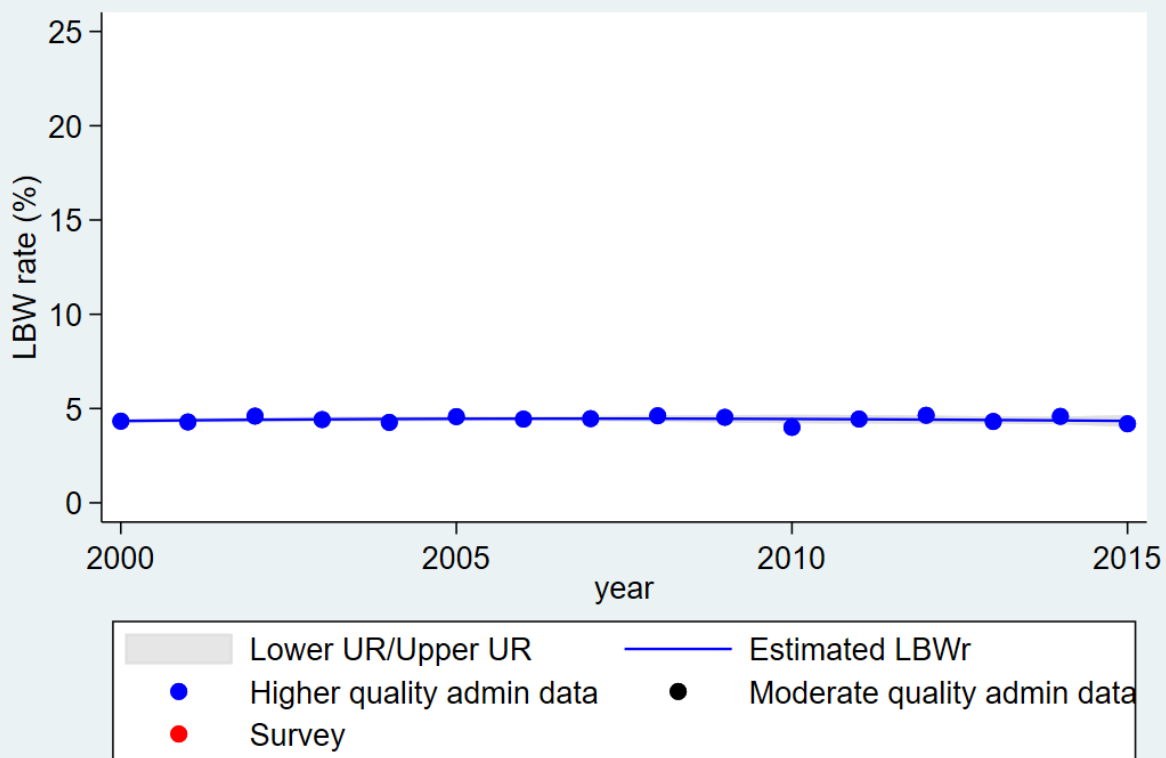

### Finland

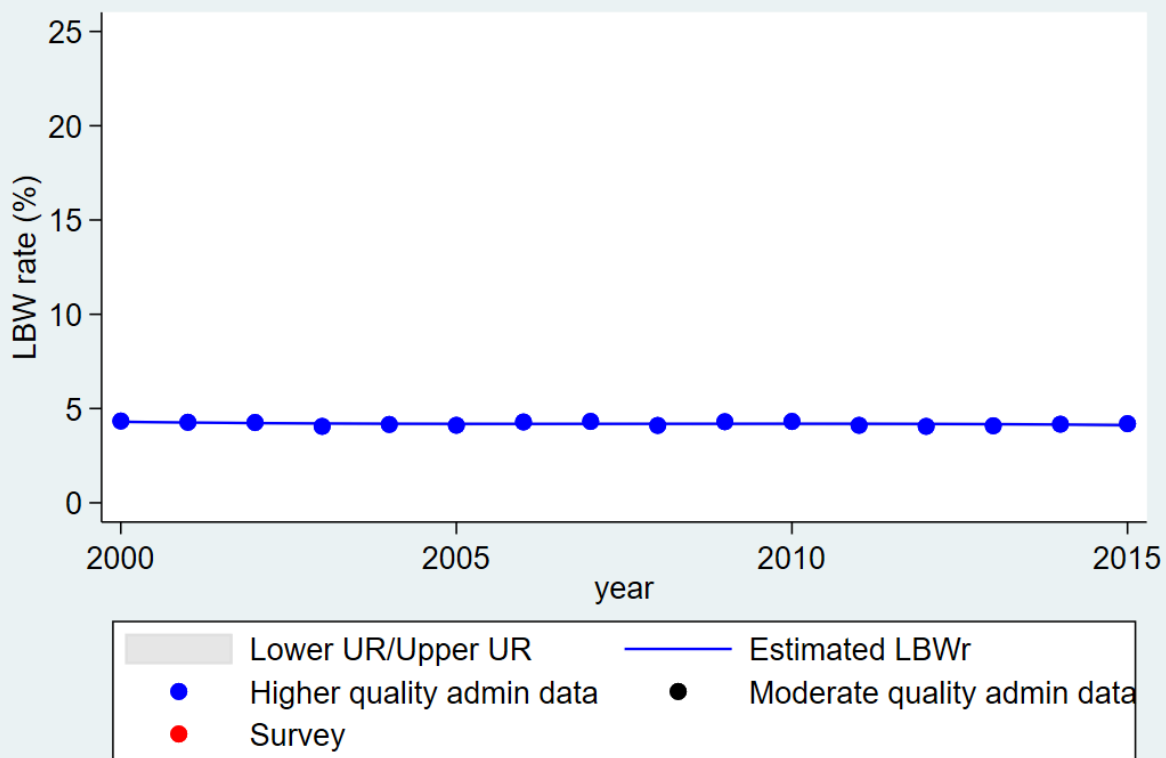



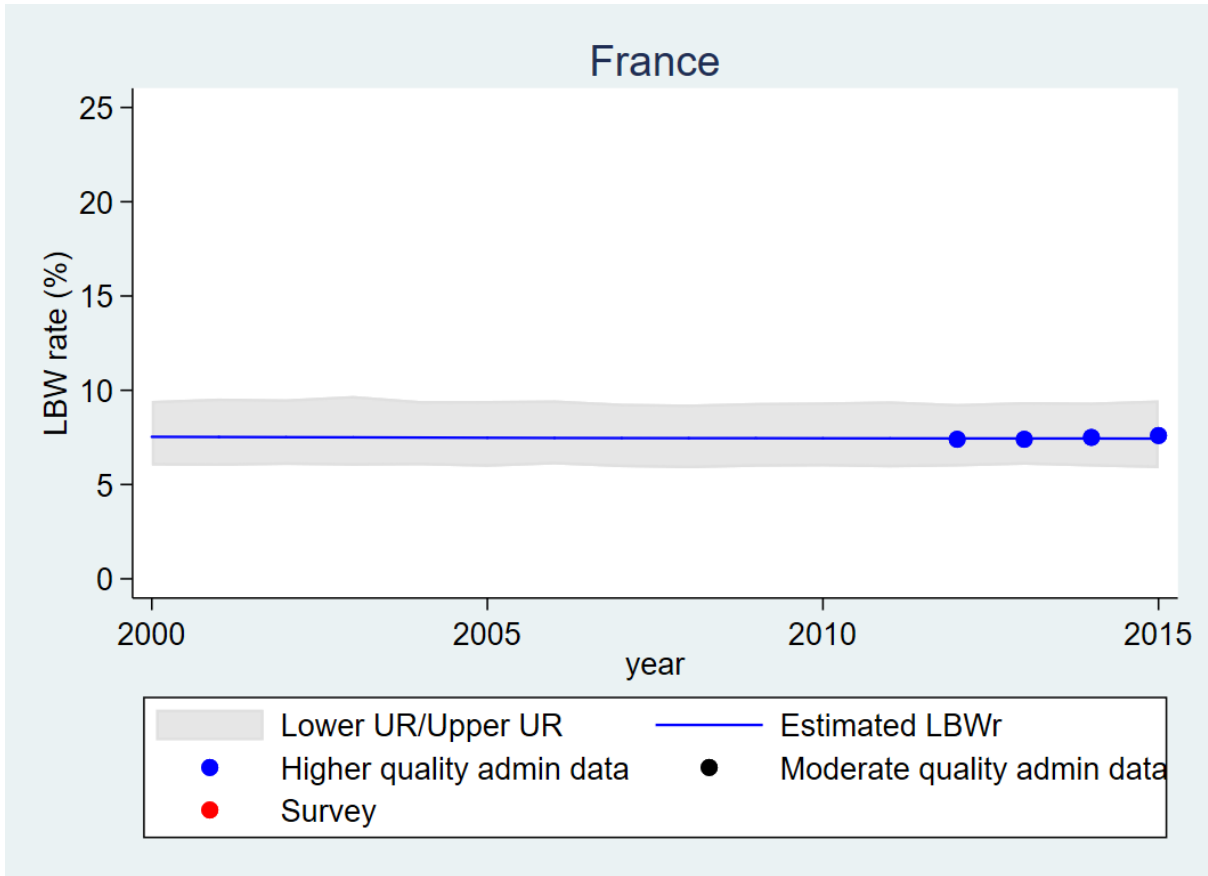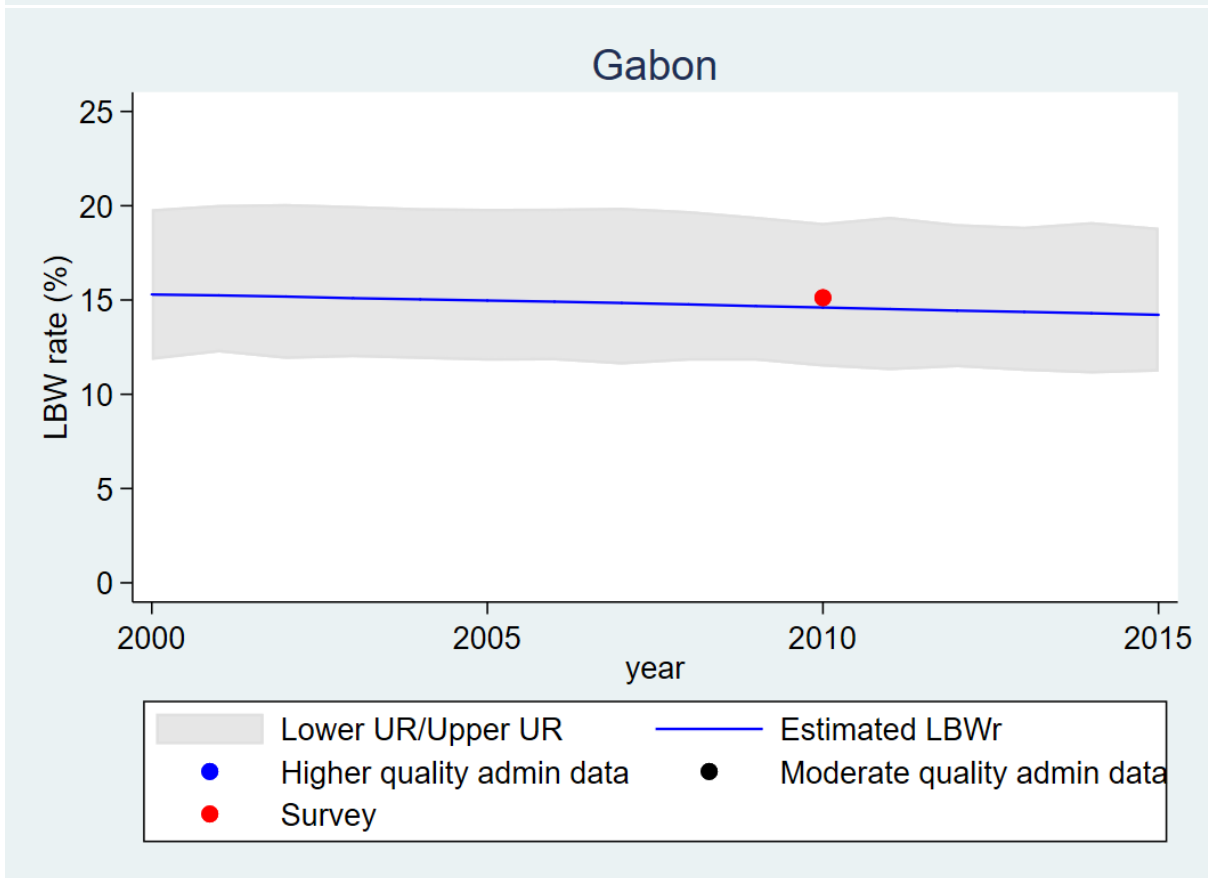

### Gambia

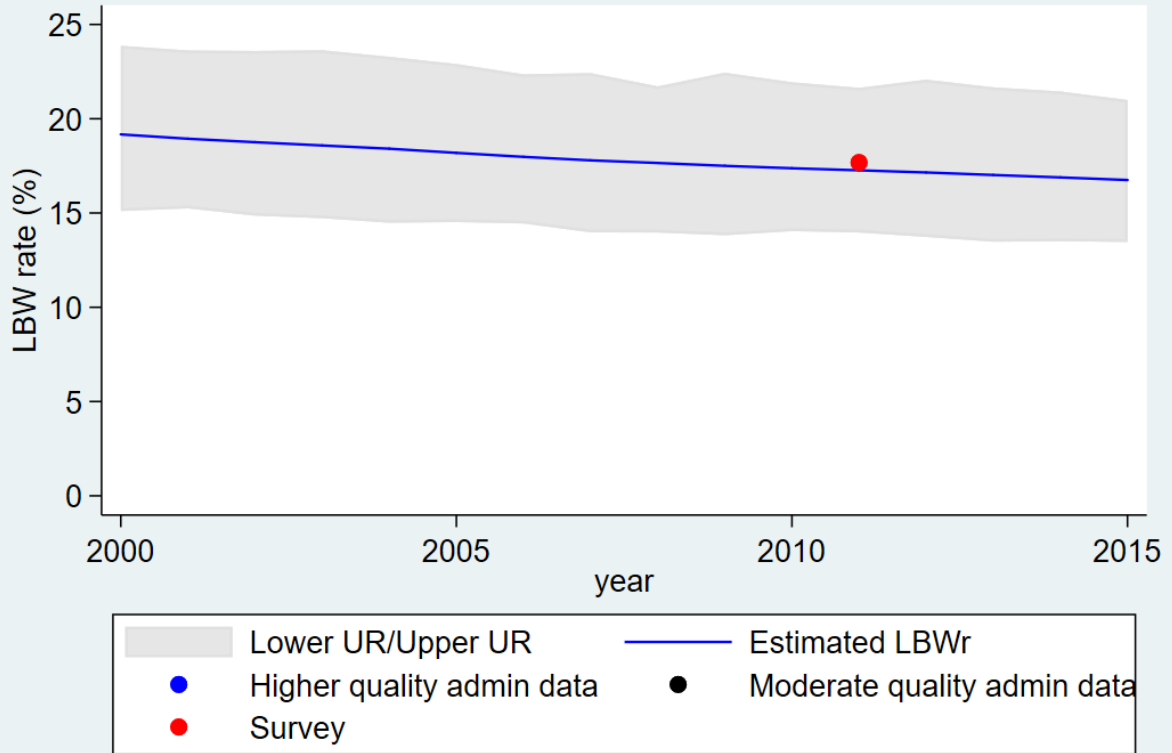

### Georgia

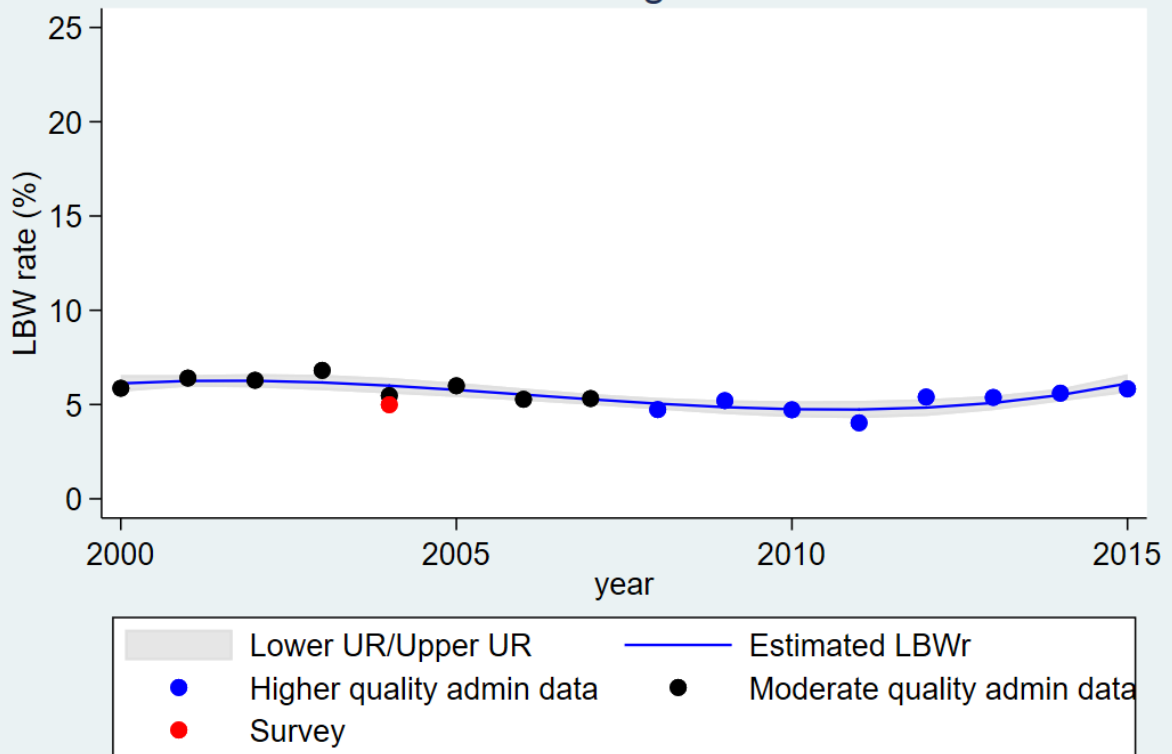

## Germany

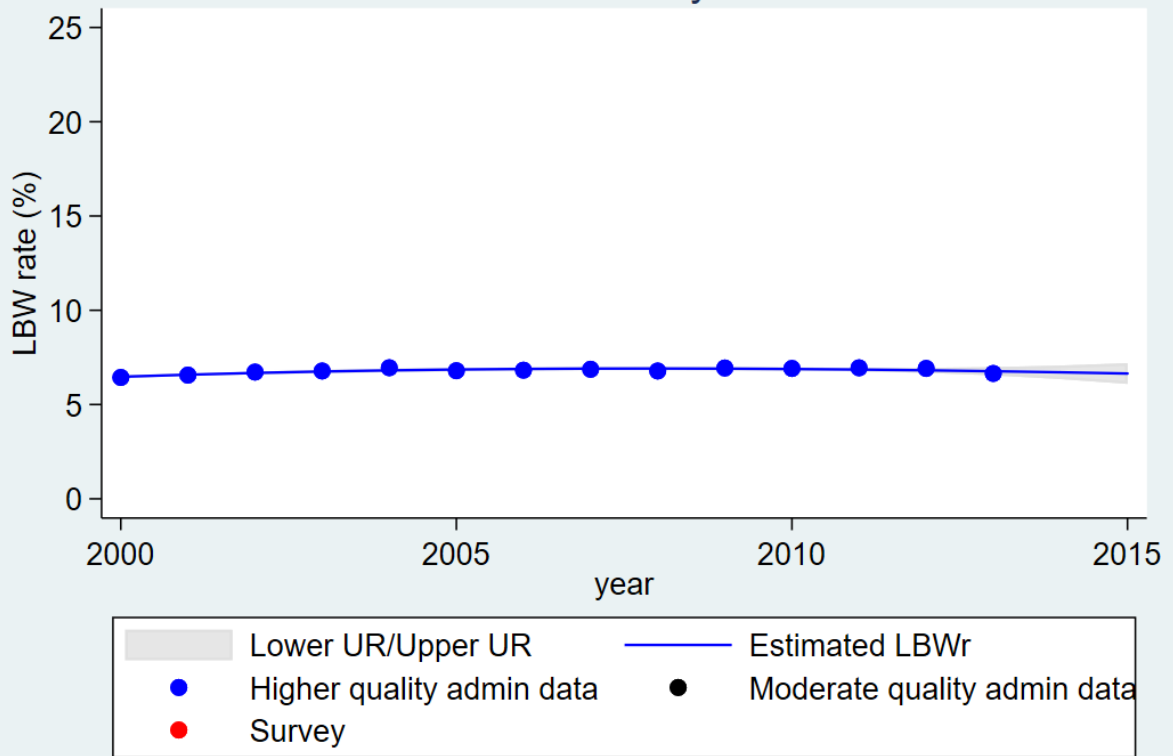

## Ghana

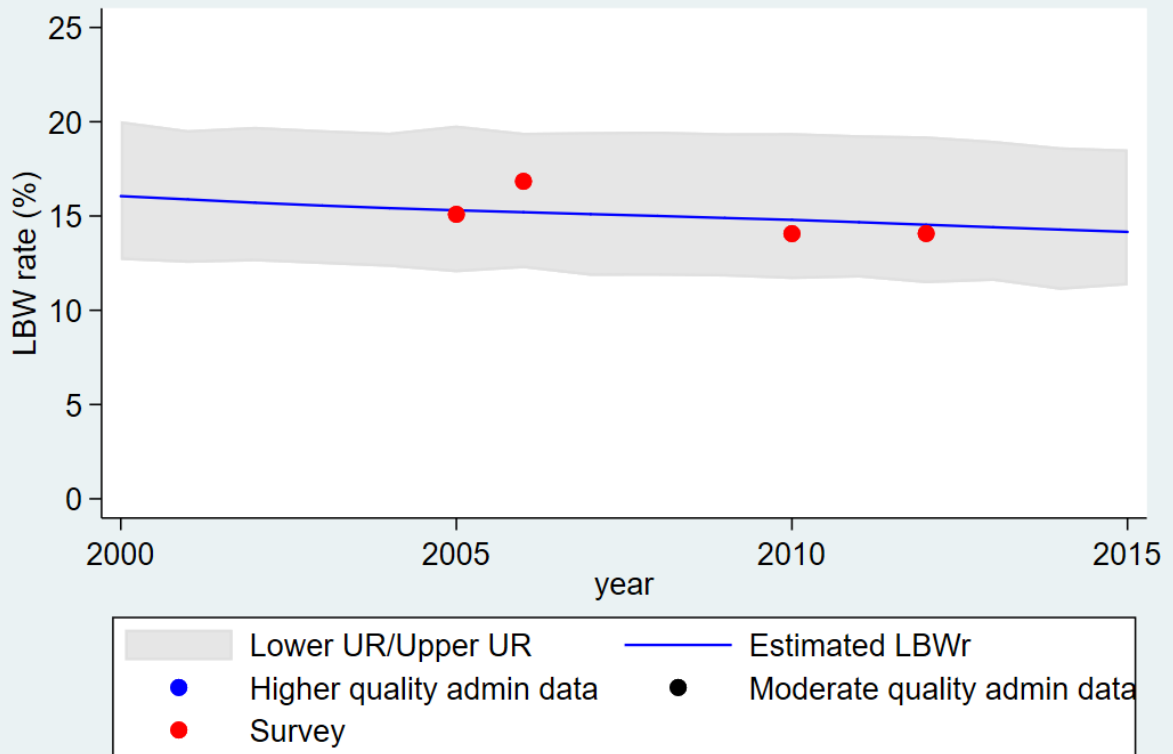

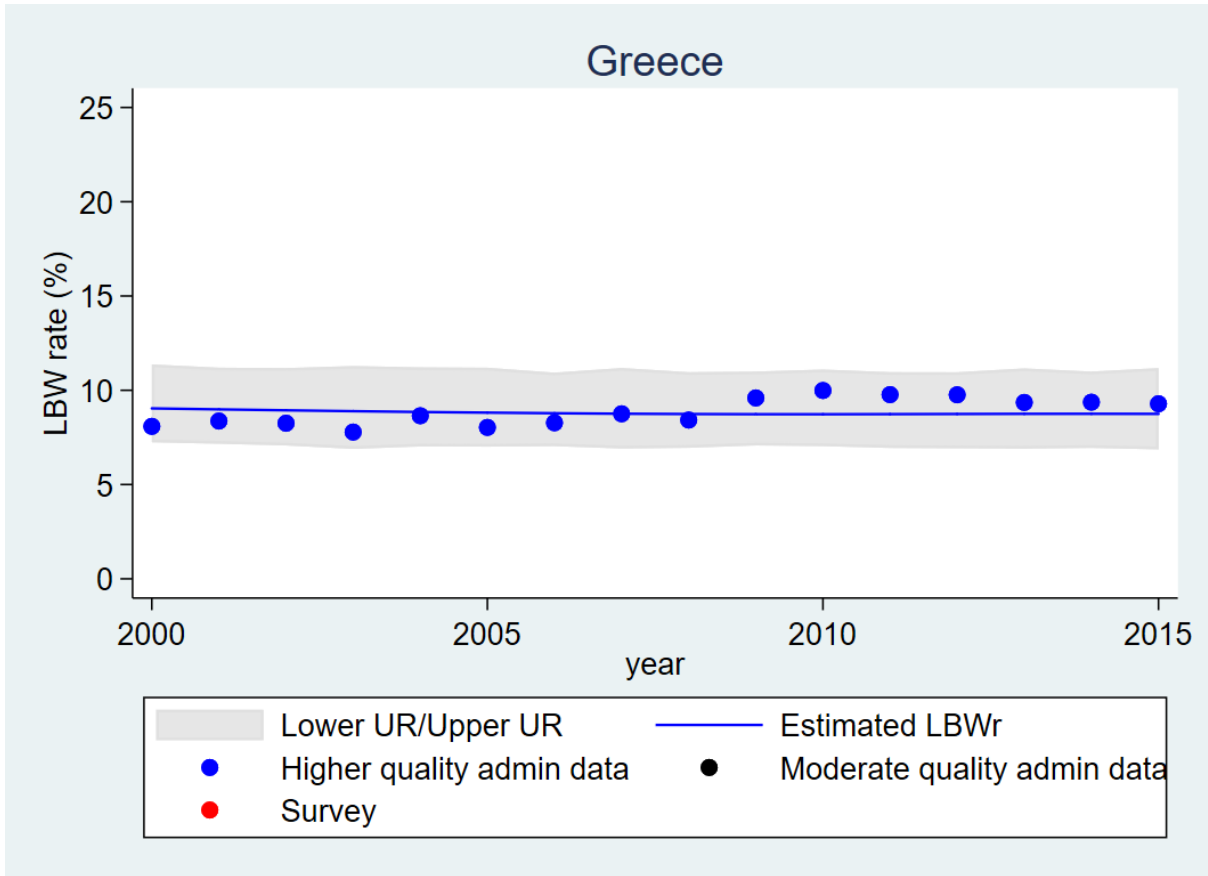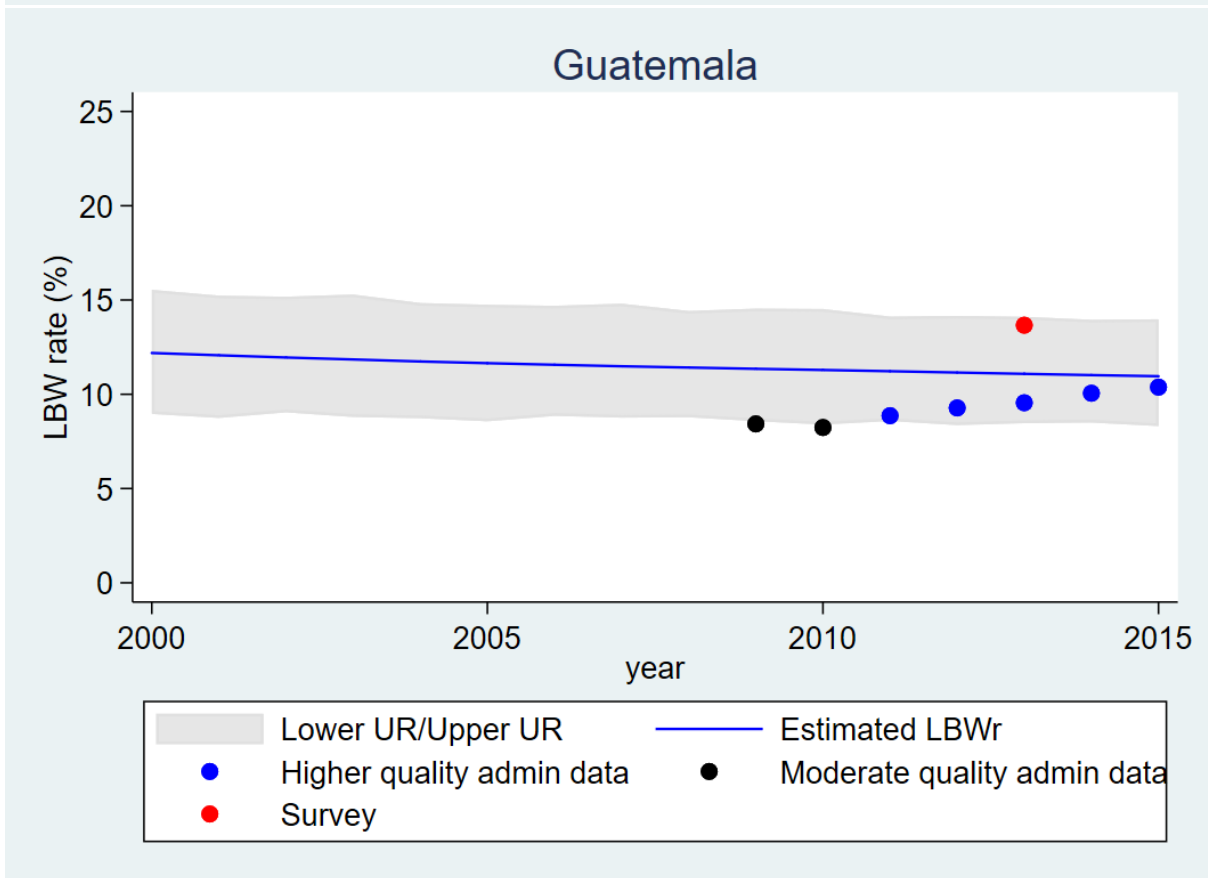

### Guinea-Bissau

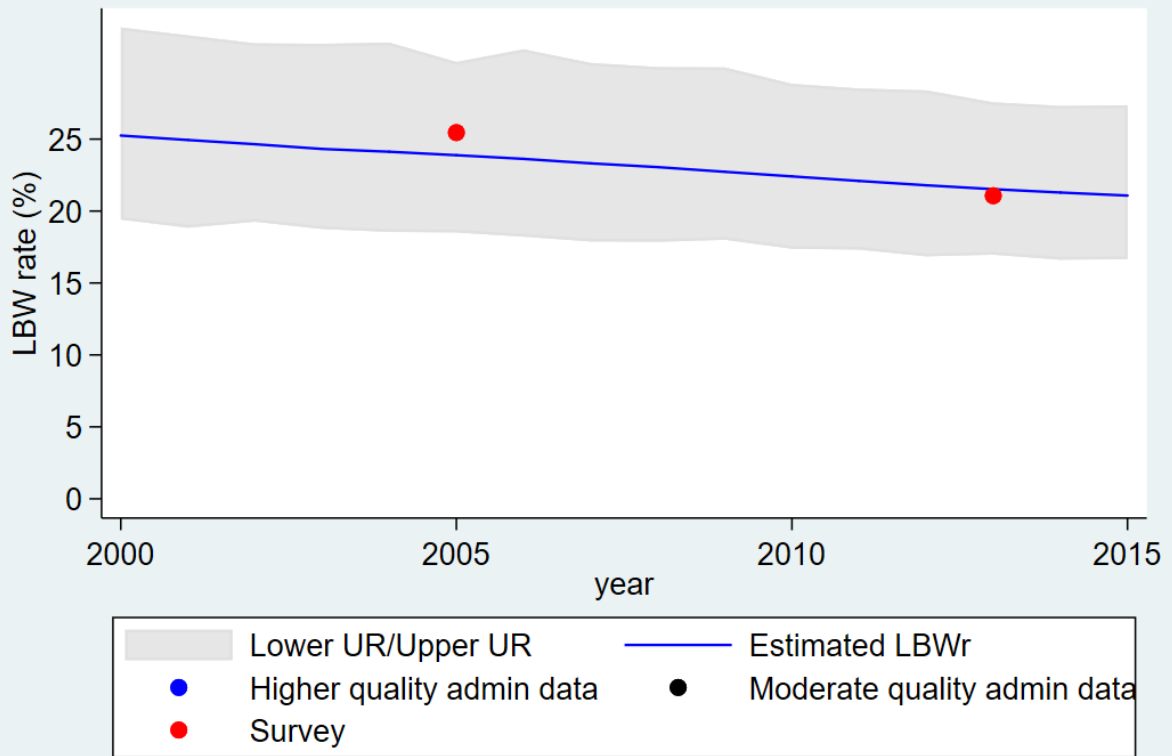

### Guyana

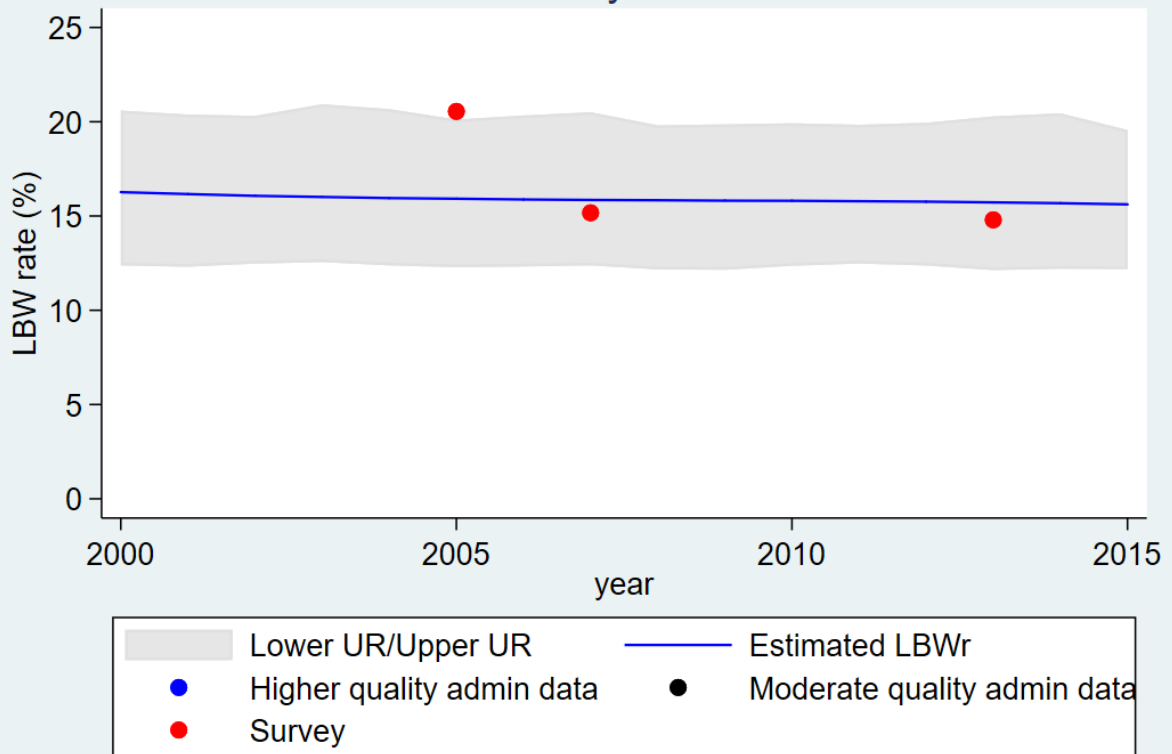

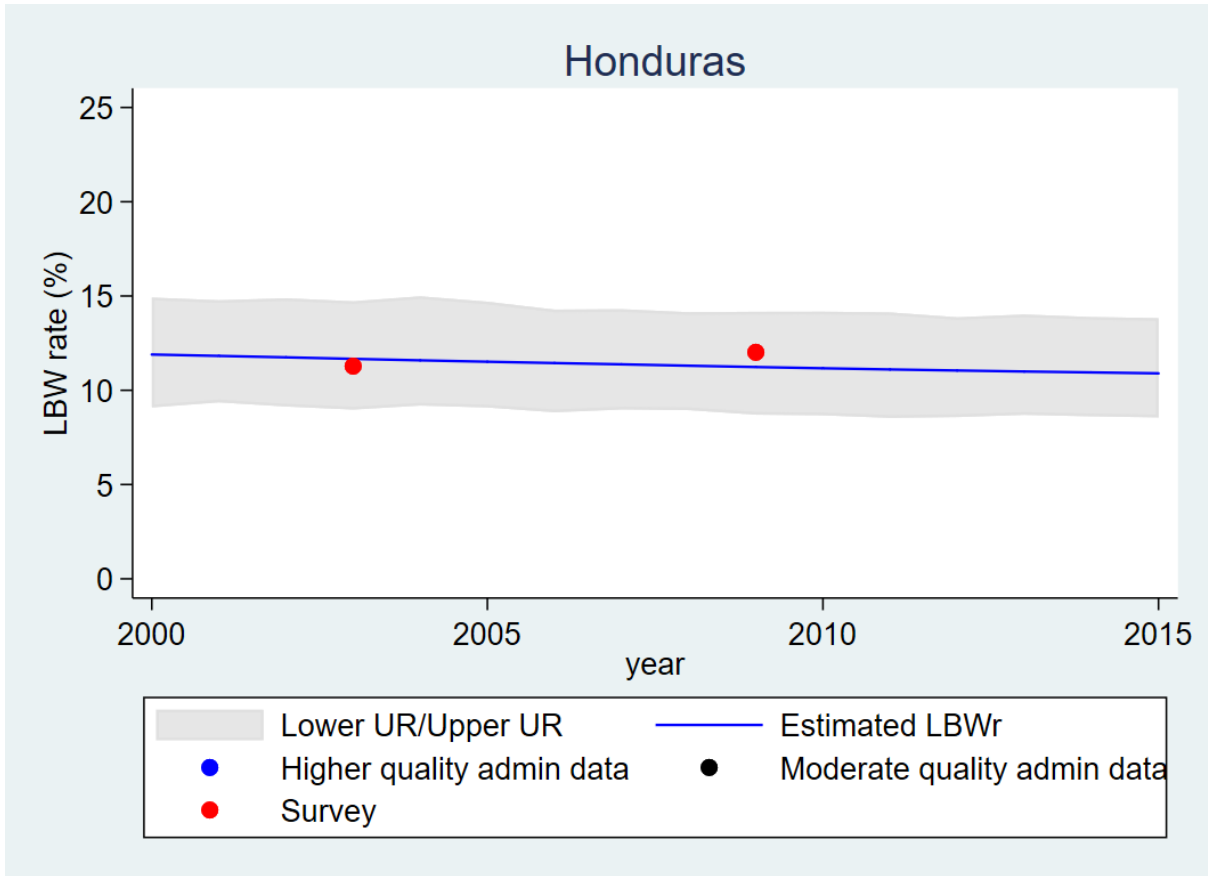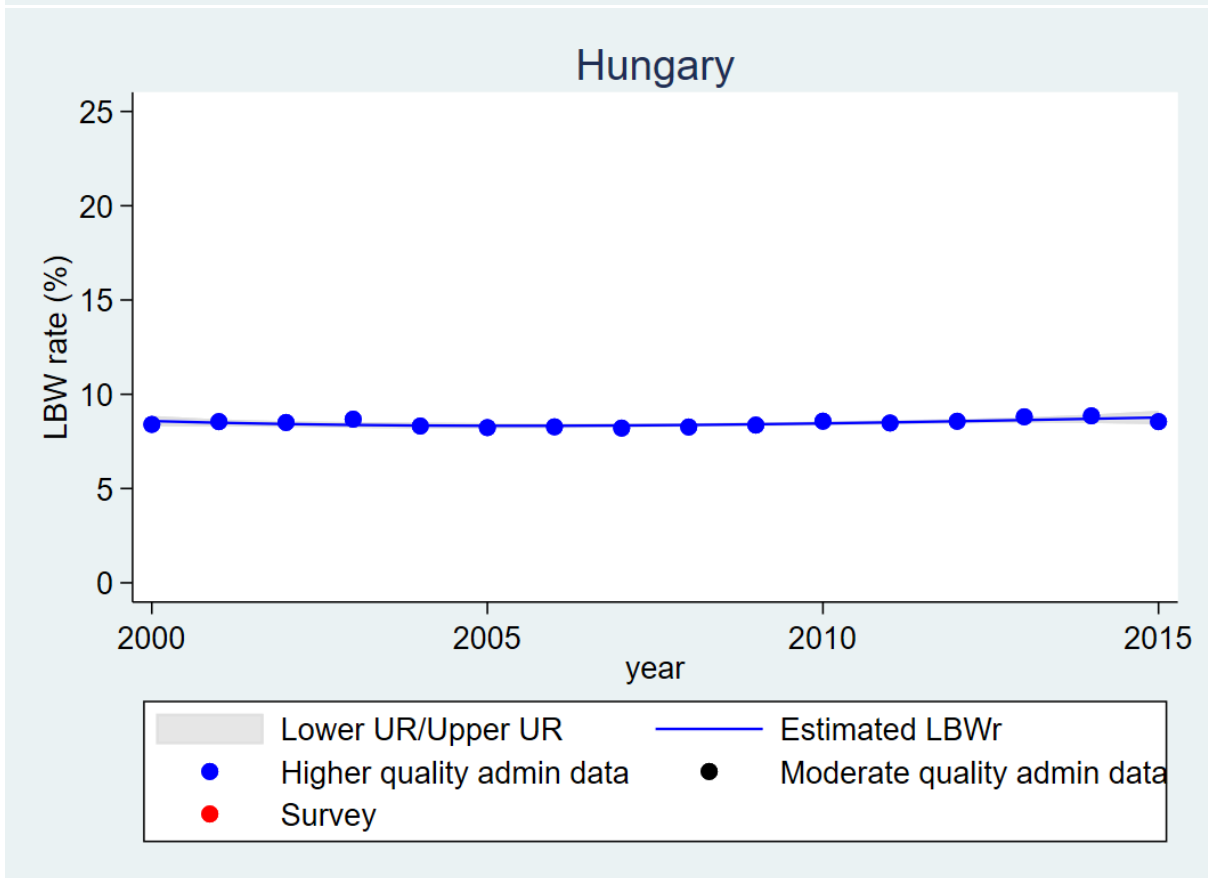

### Iceland

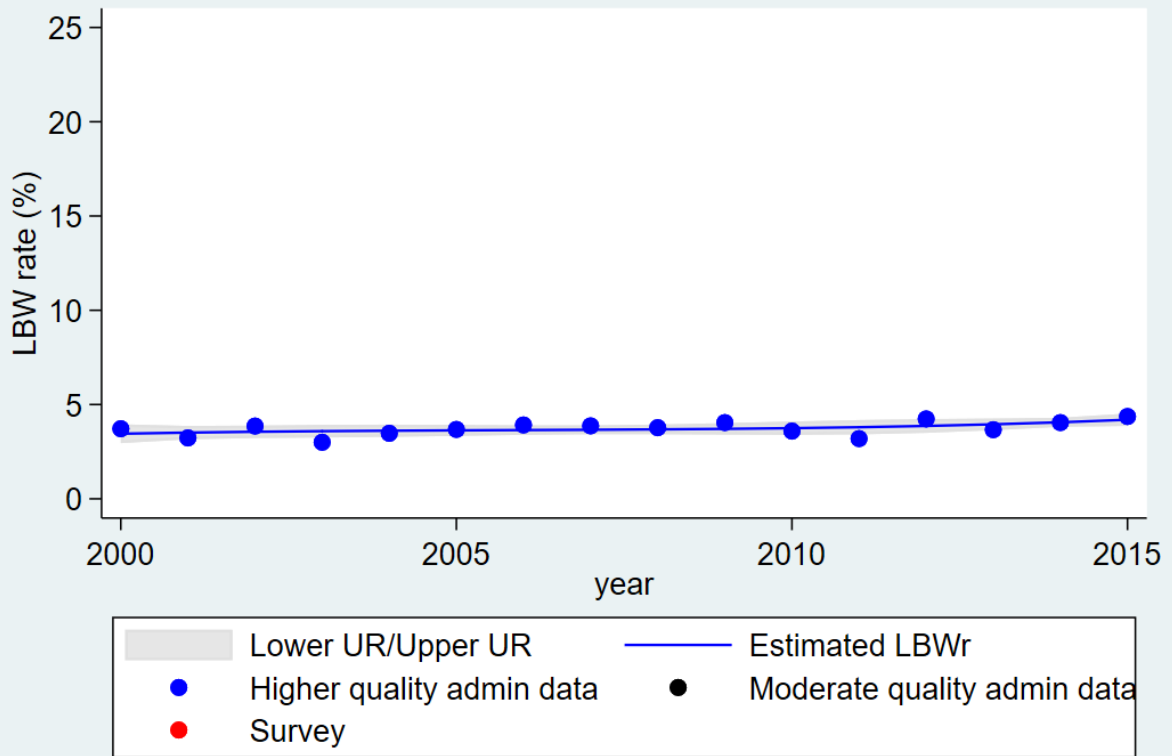

### Indonesia

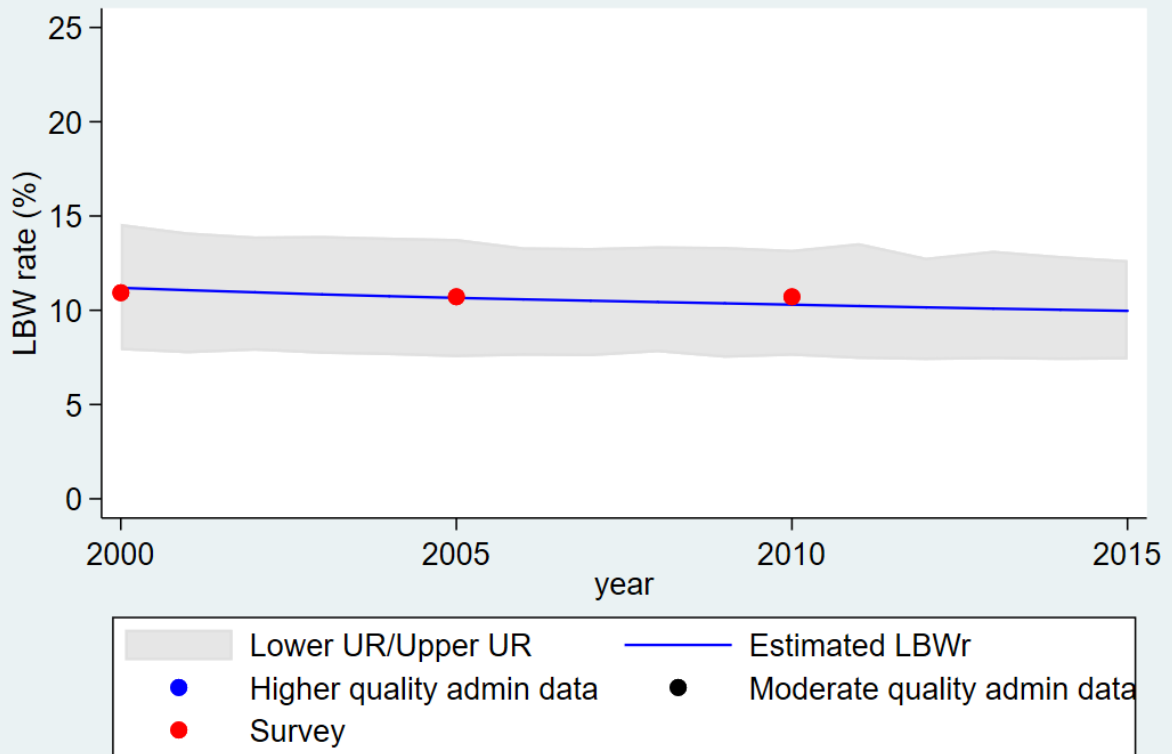

### Ireland

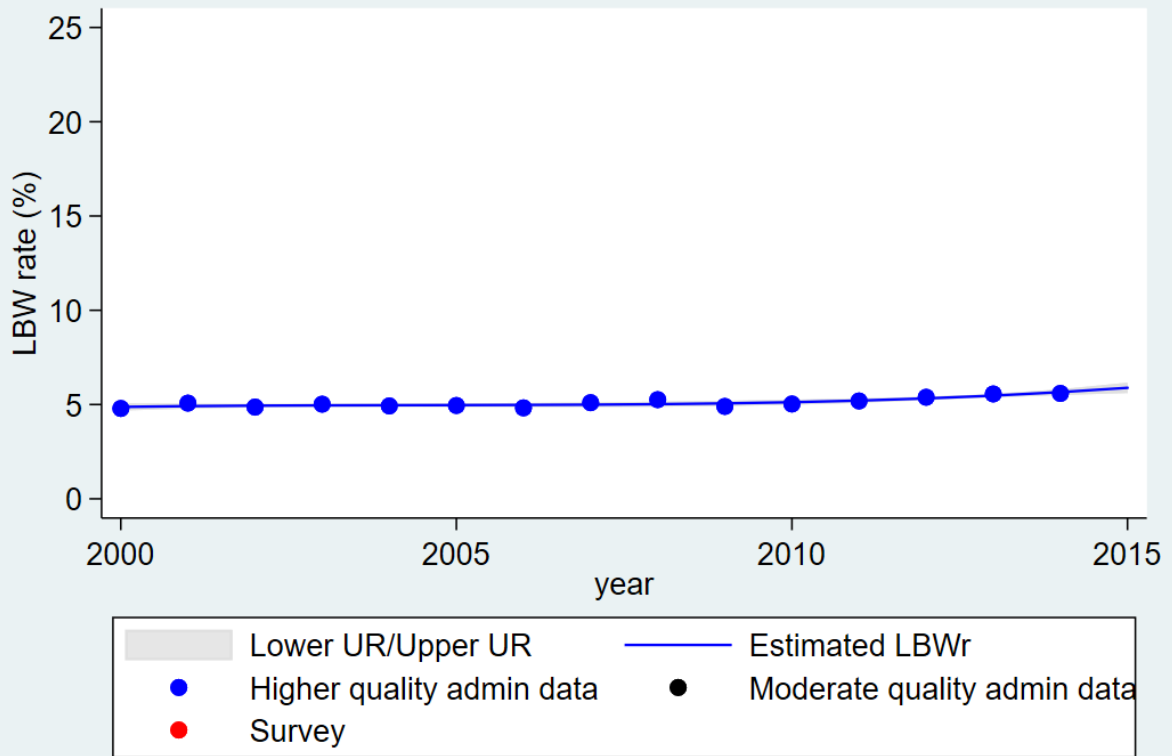

### Israel

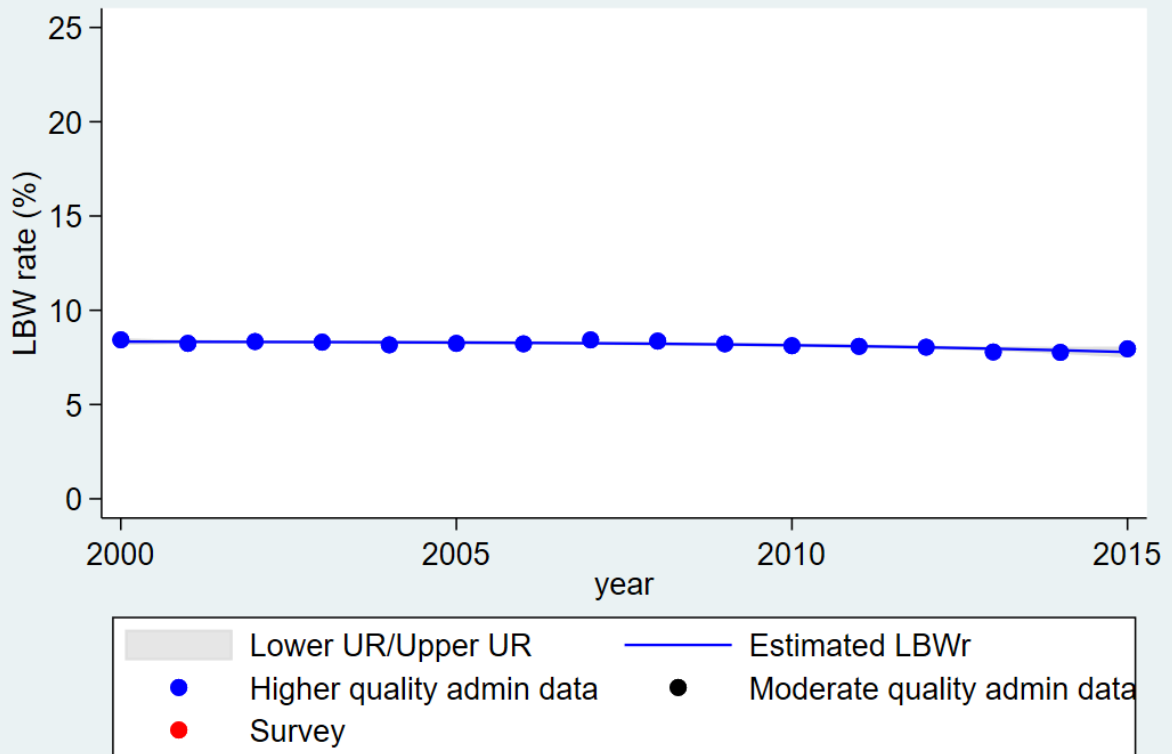



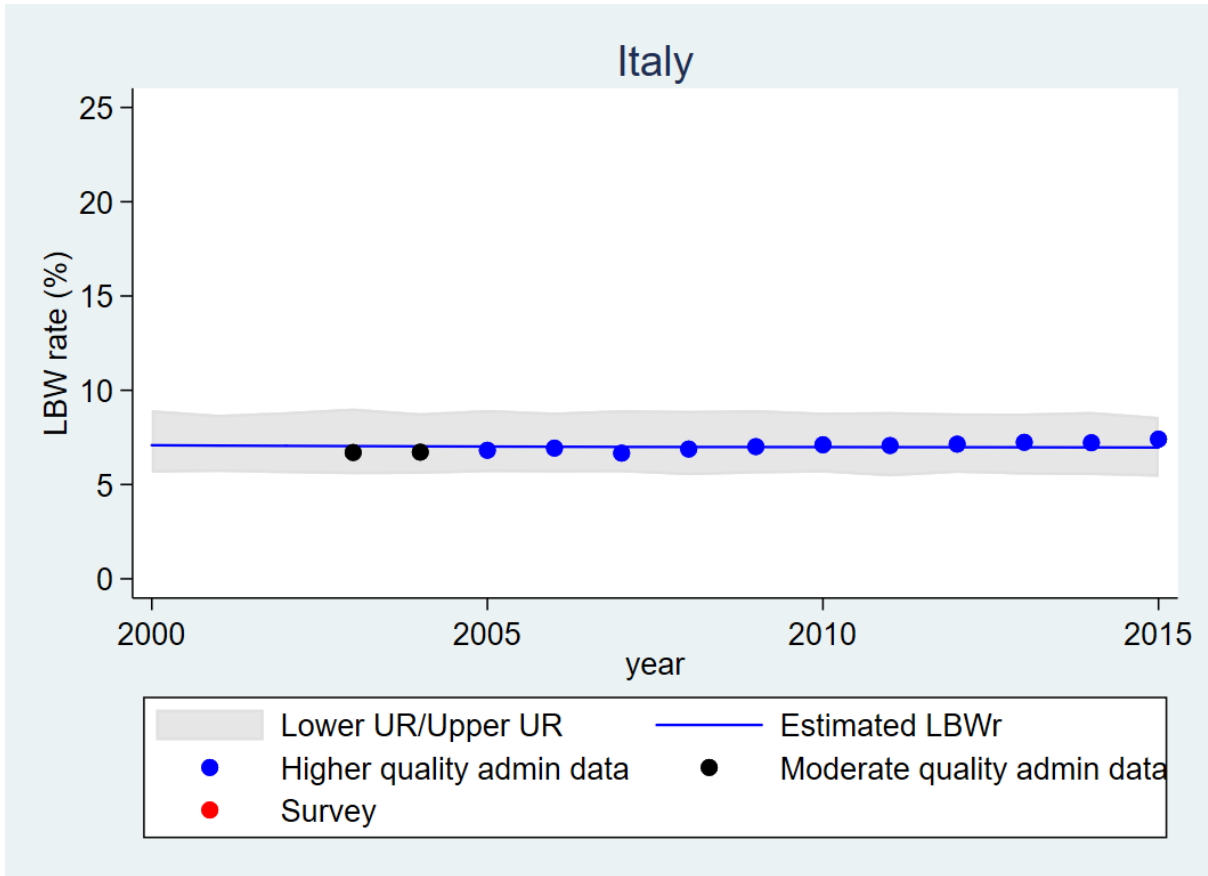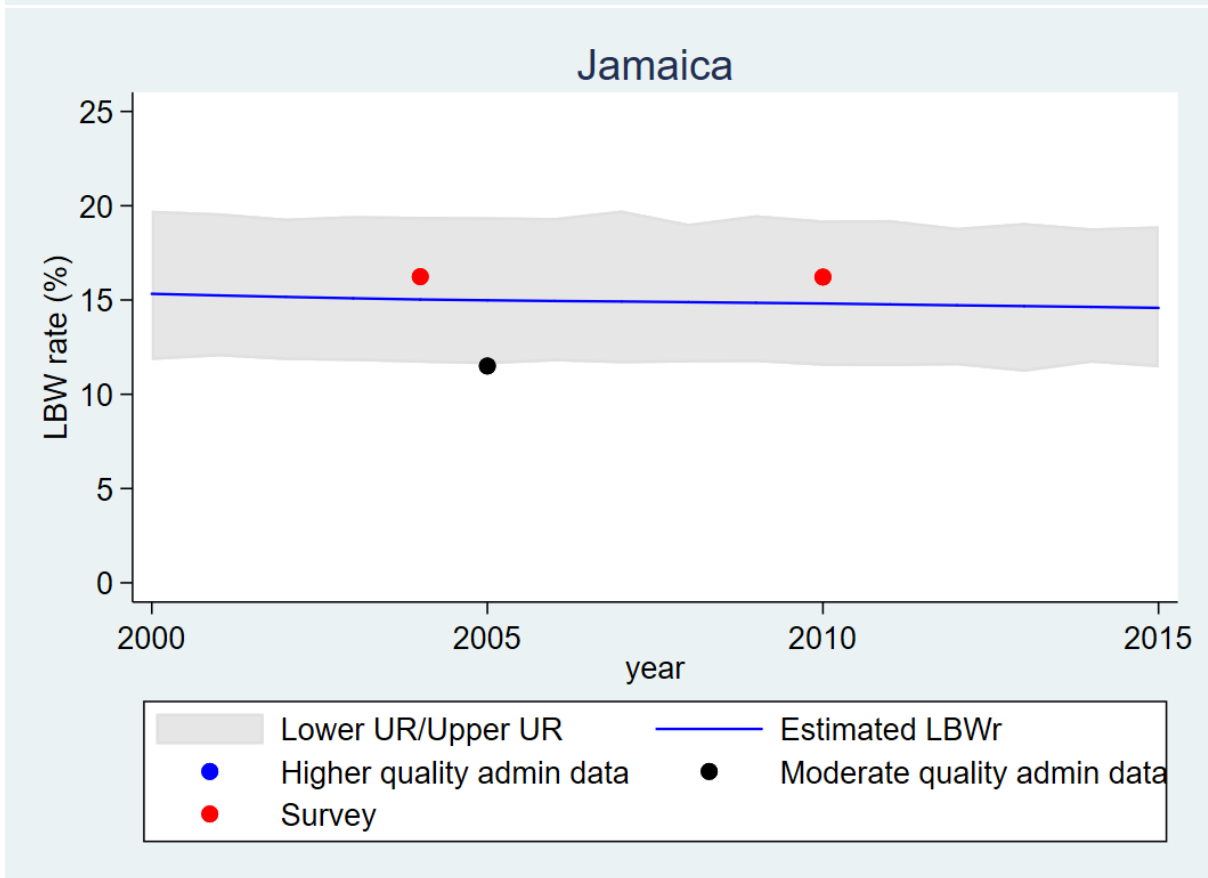

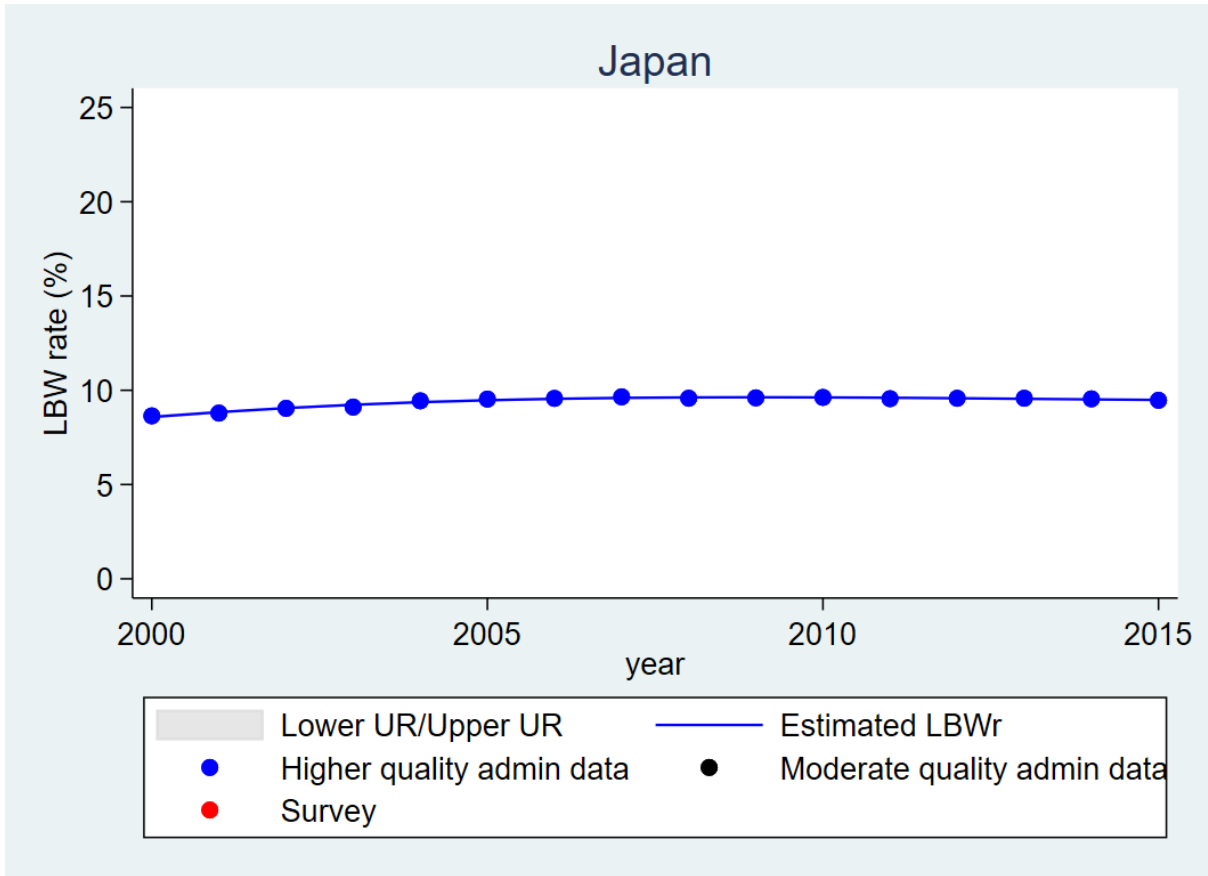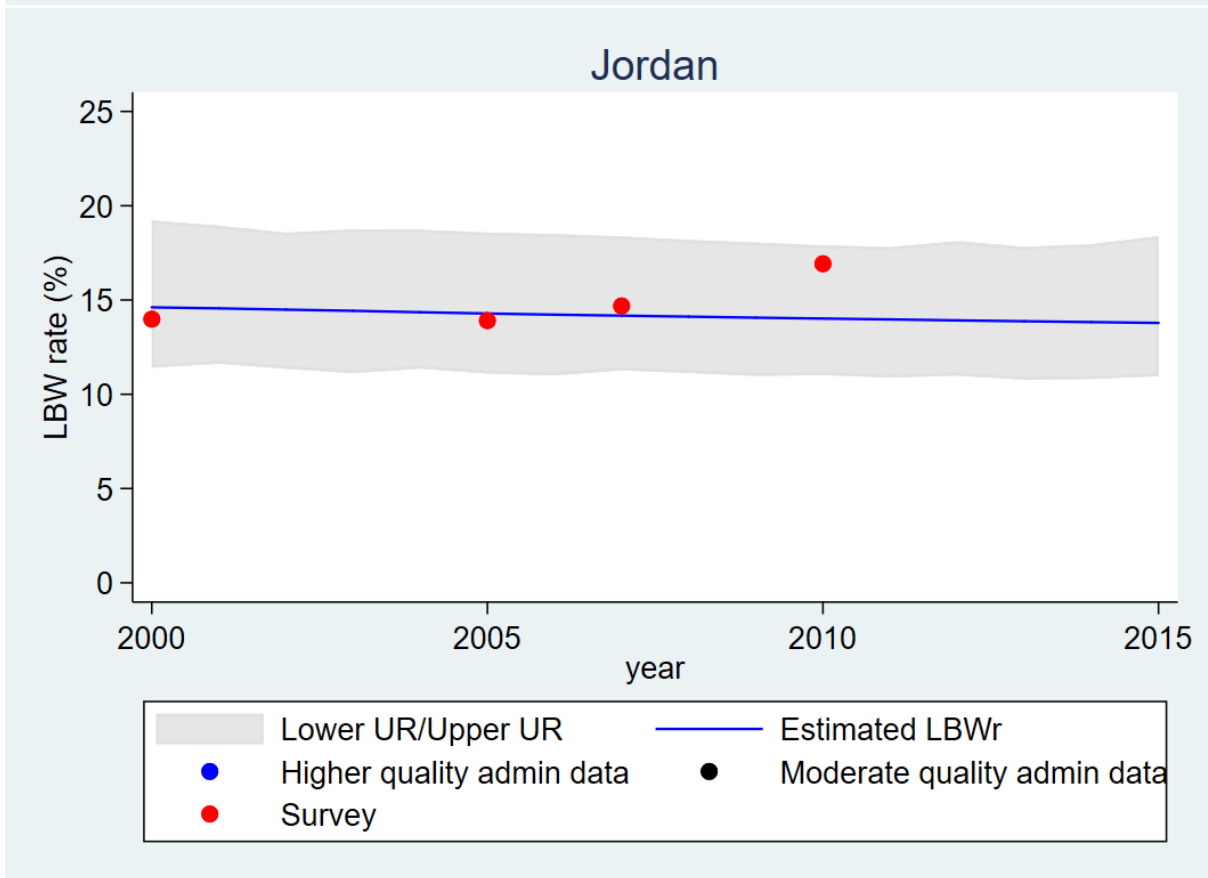

## Kazakhstan

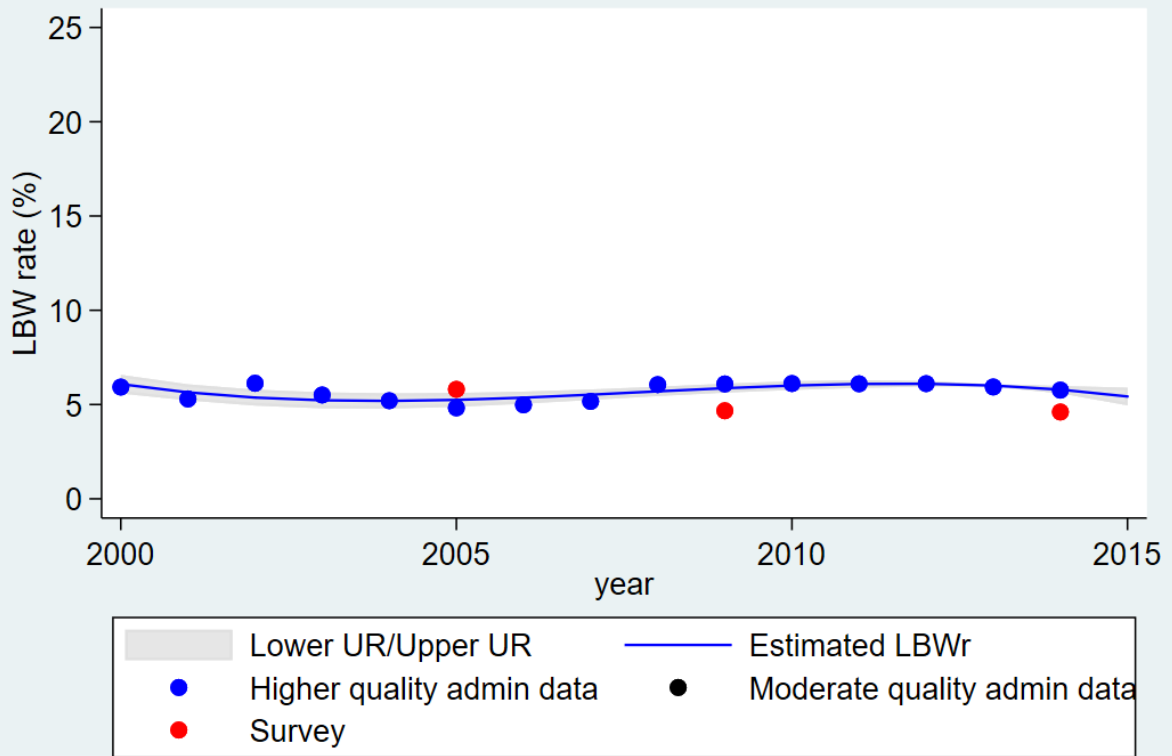

## Kenya

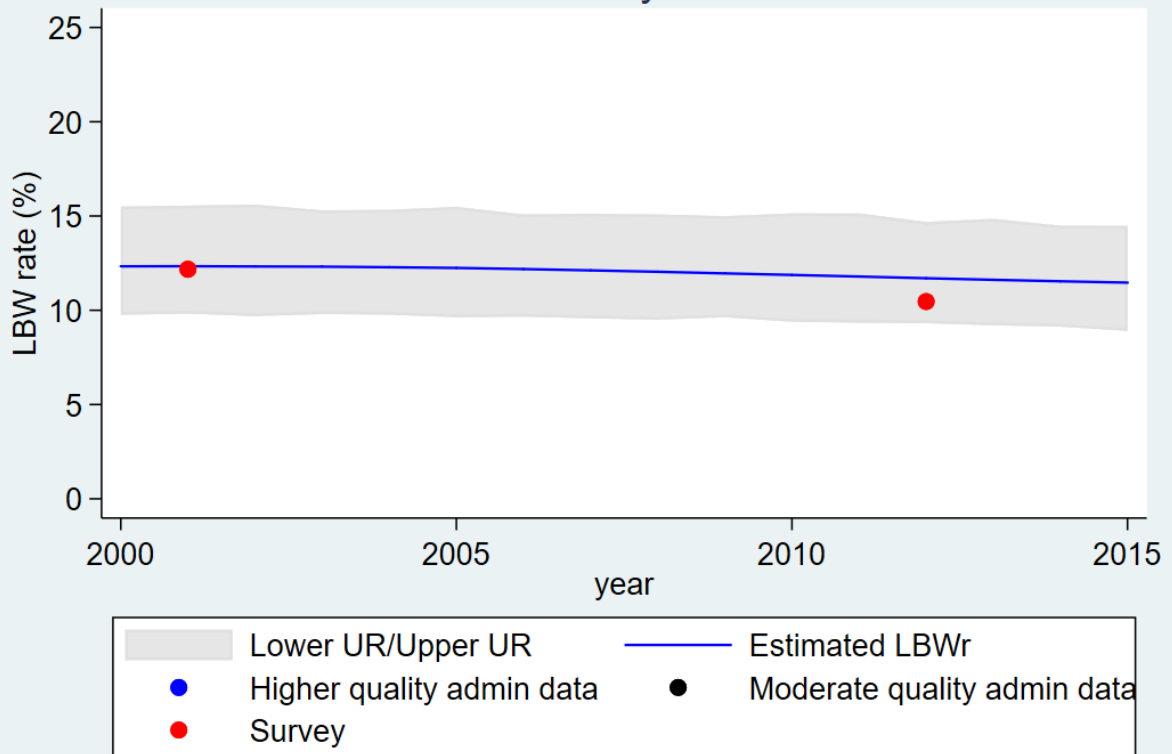

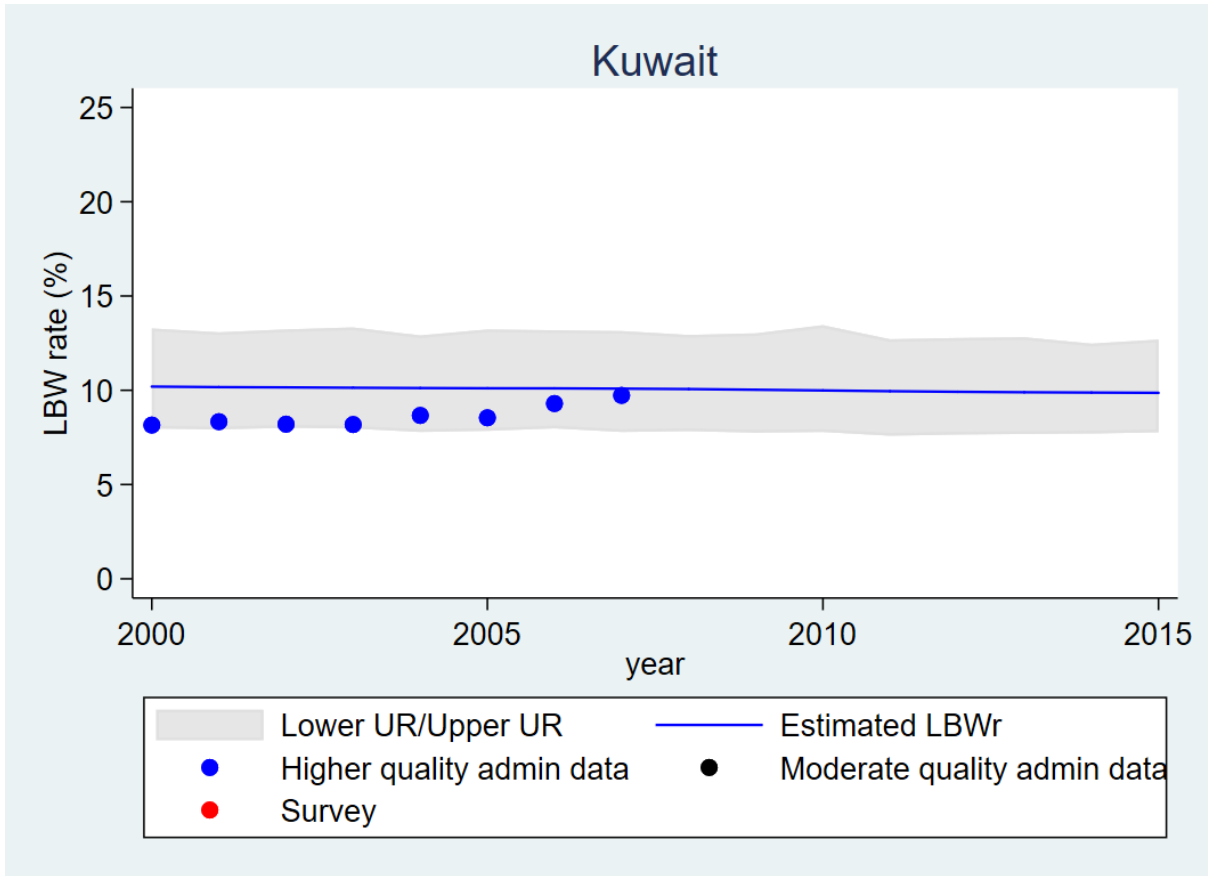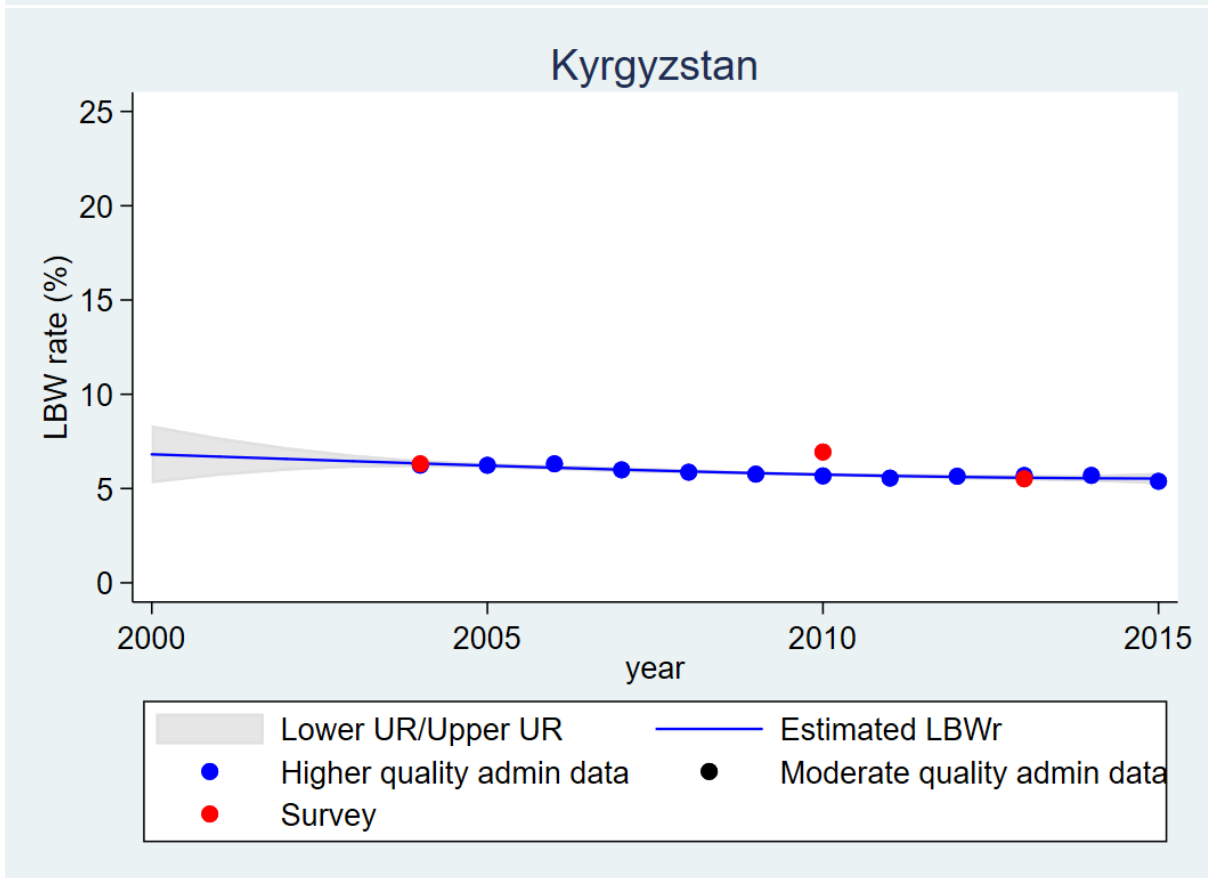

### Lao People's Democratic Republic

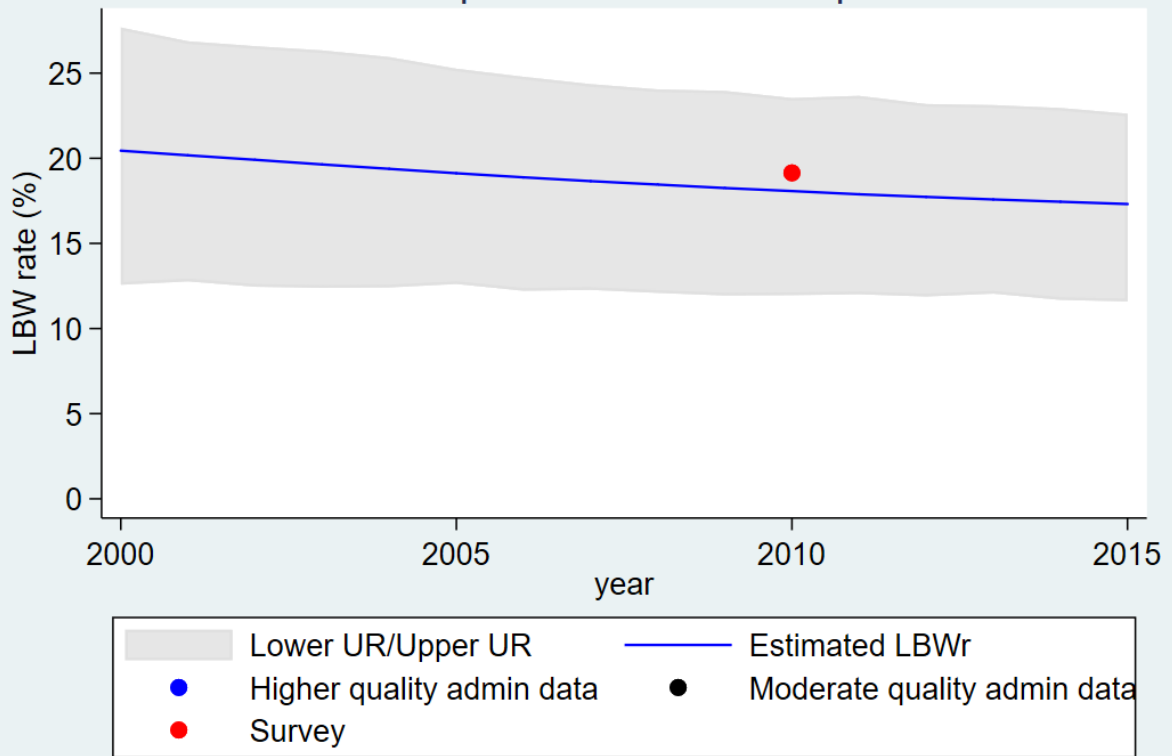

### Latvia

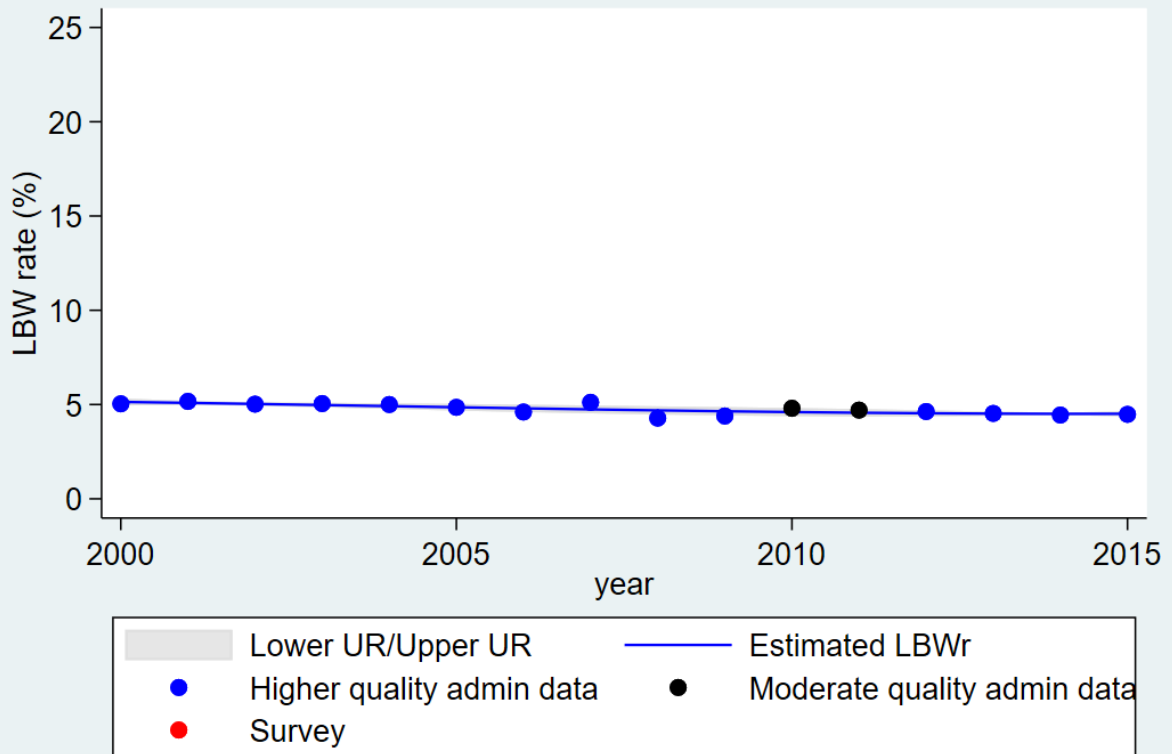

## Lebanon

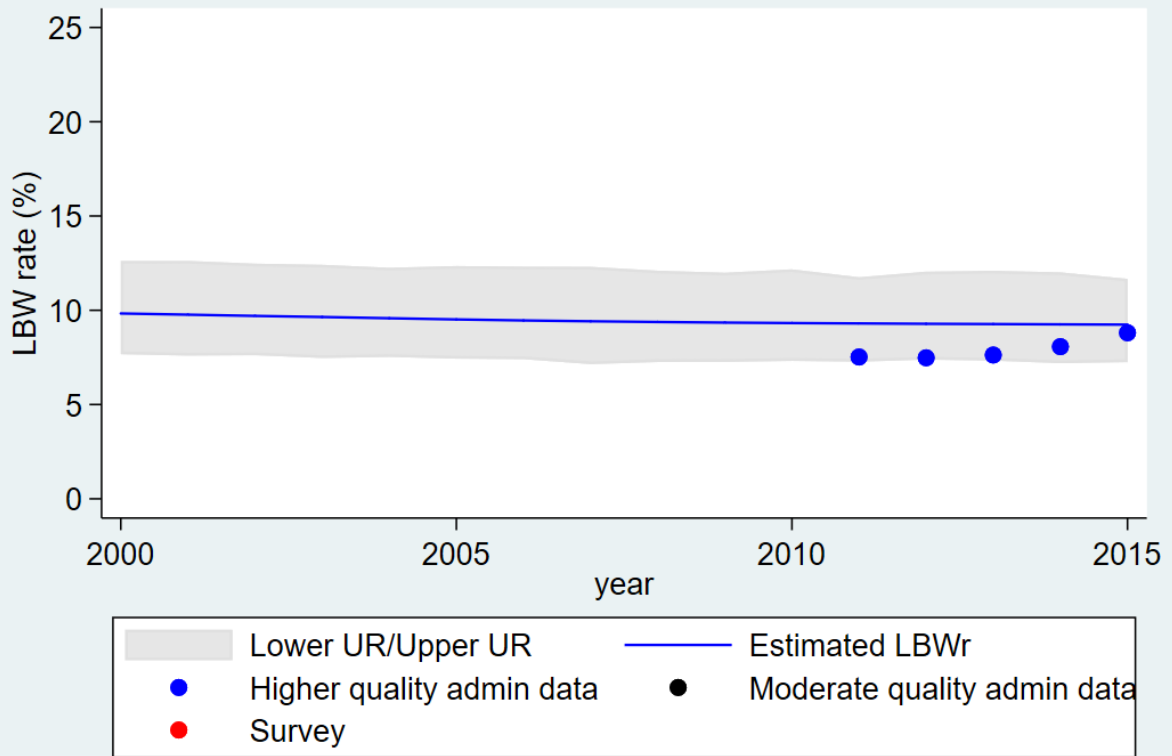

## Lesotho

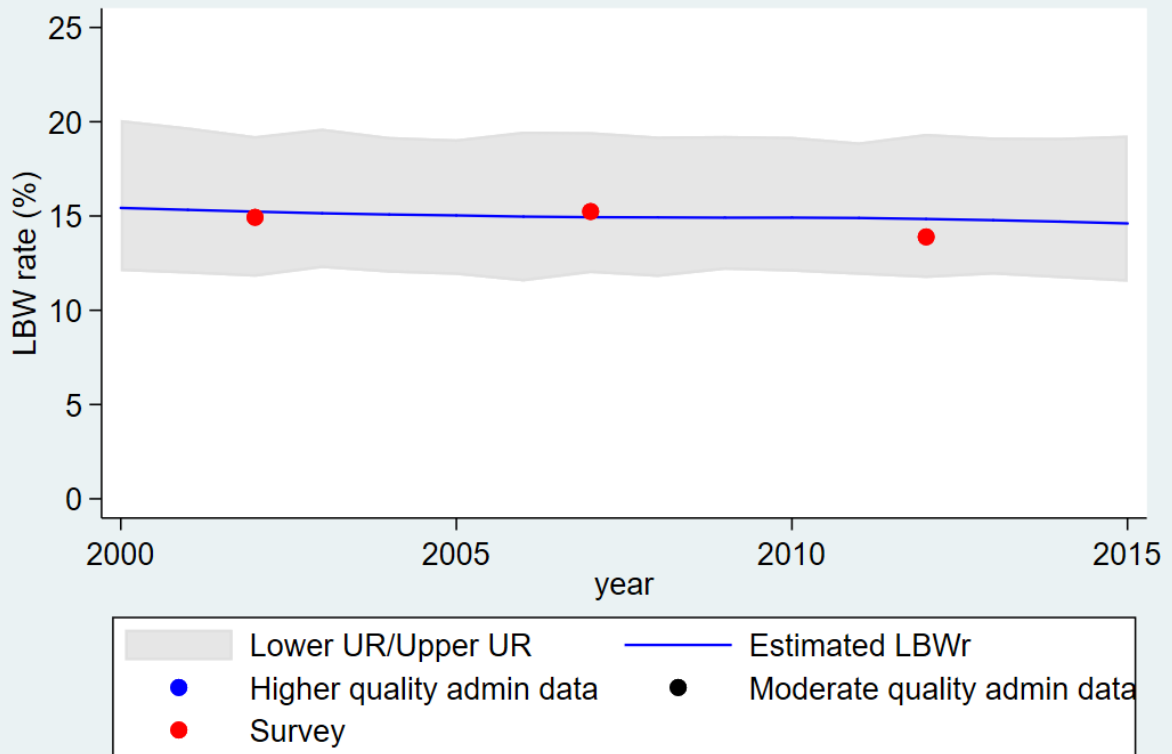

### Lithuania

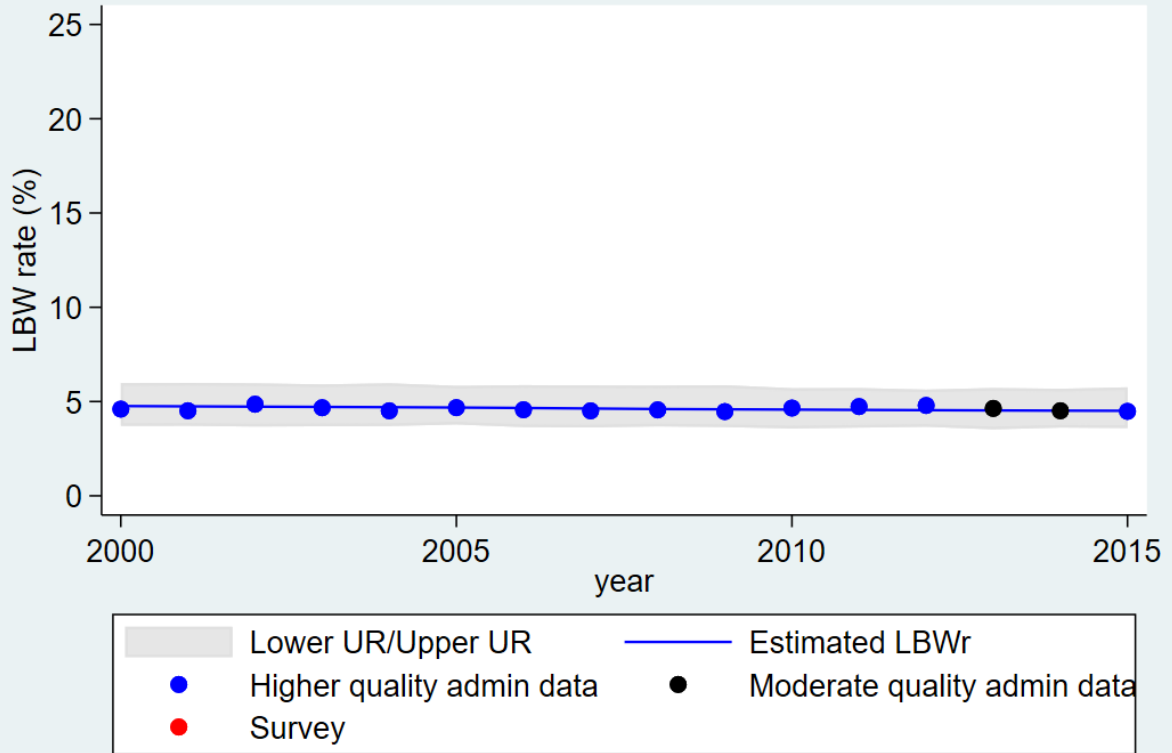

### Luxembourg

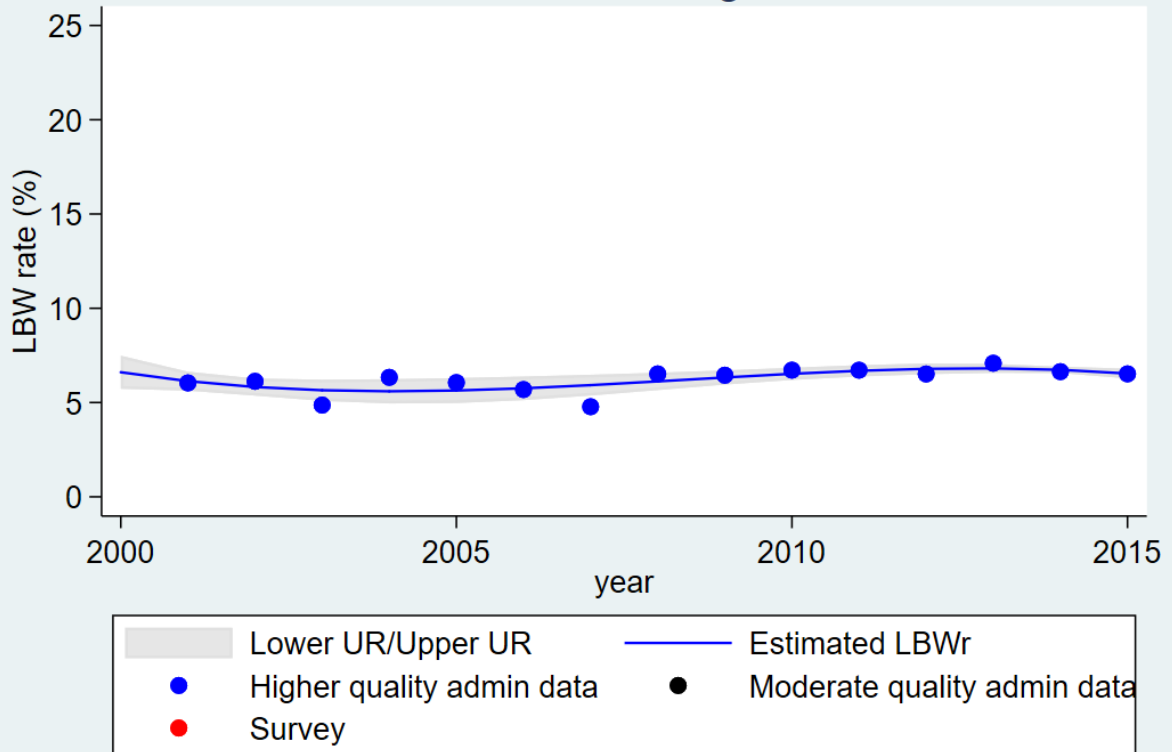

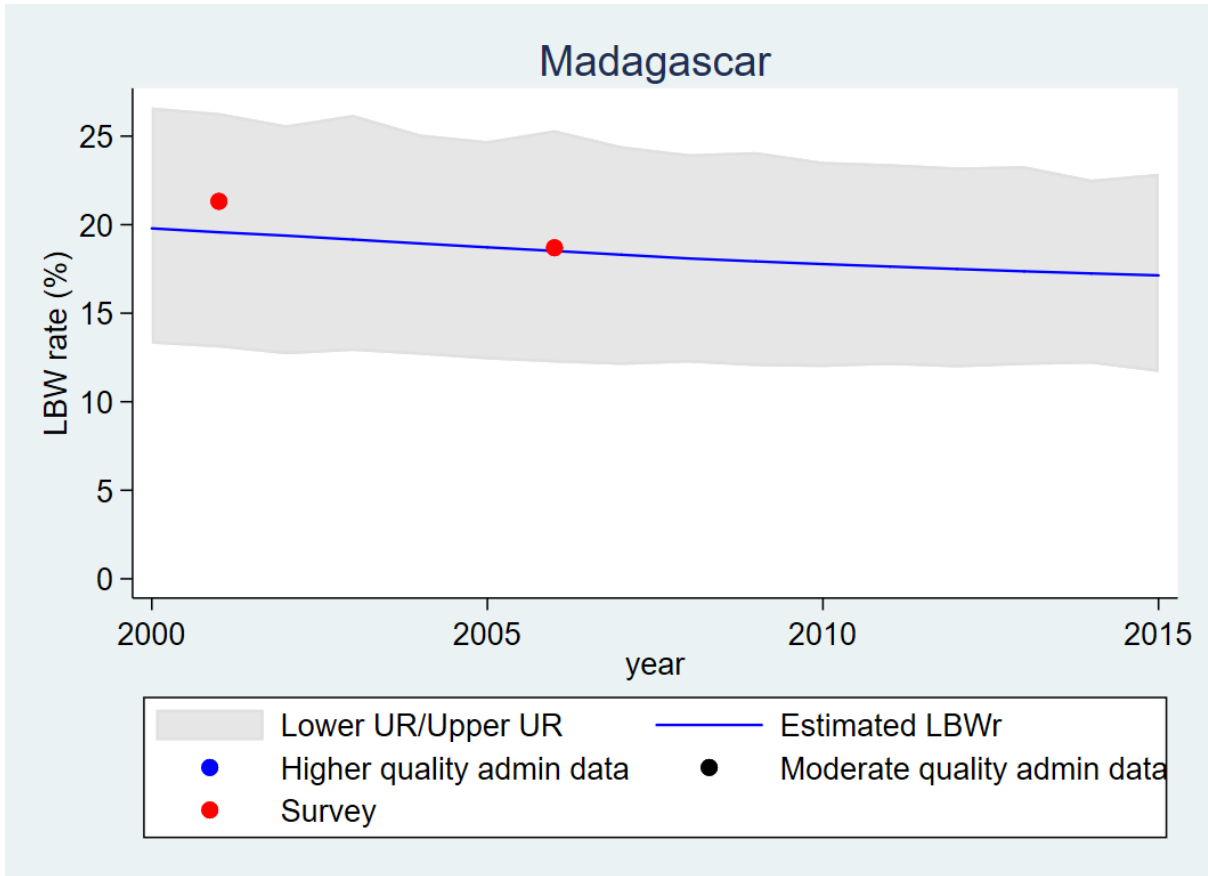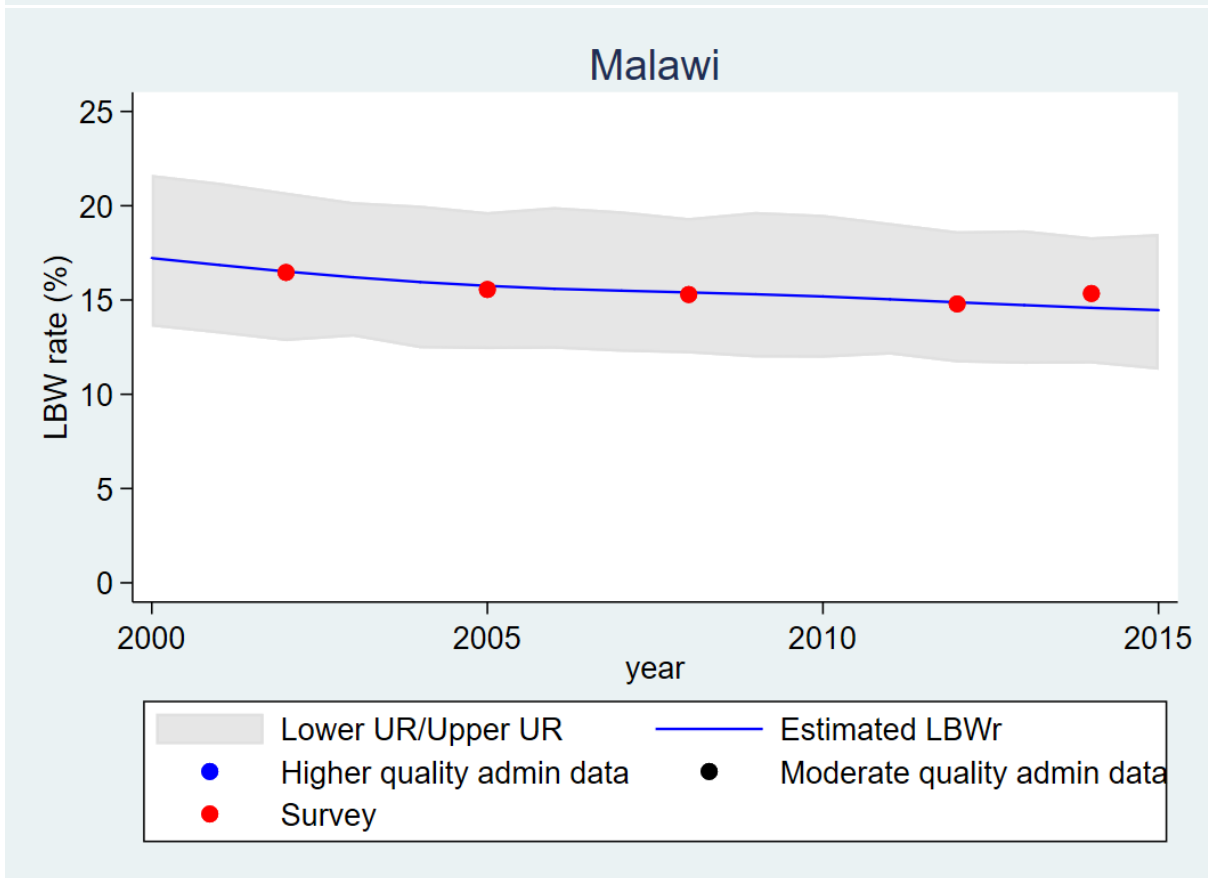



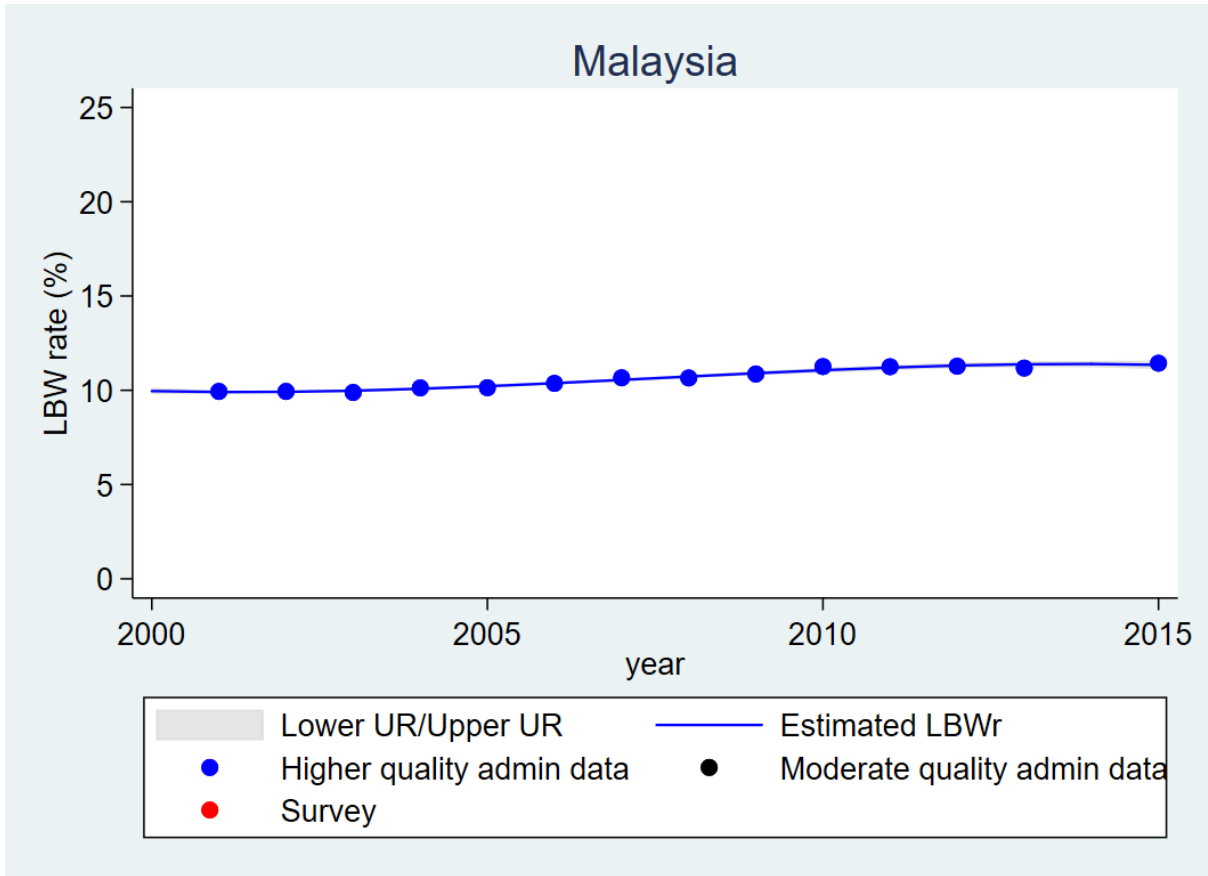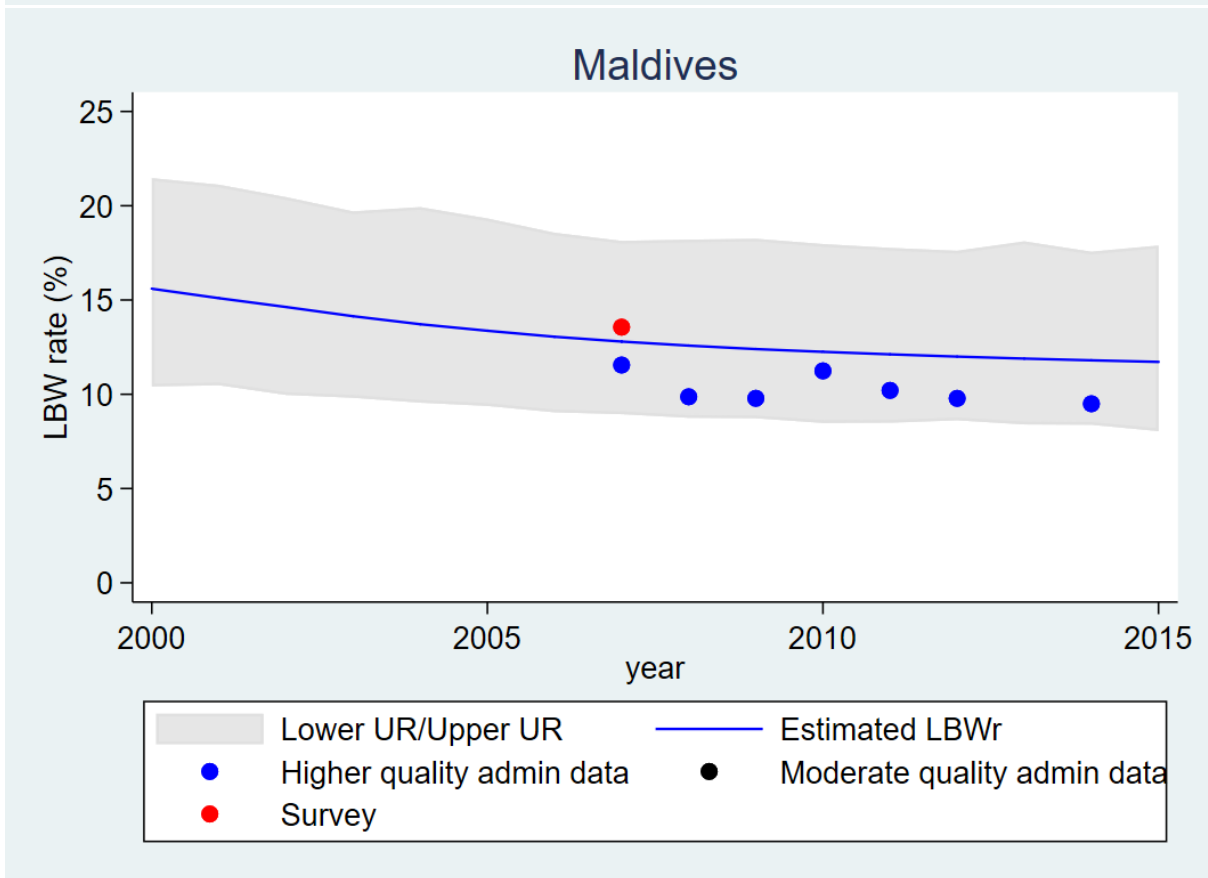

### Malta

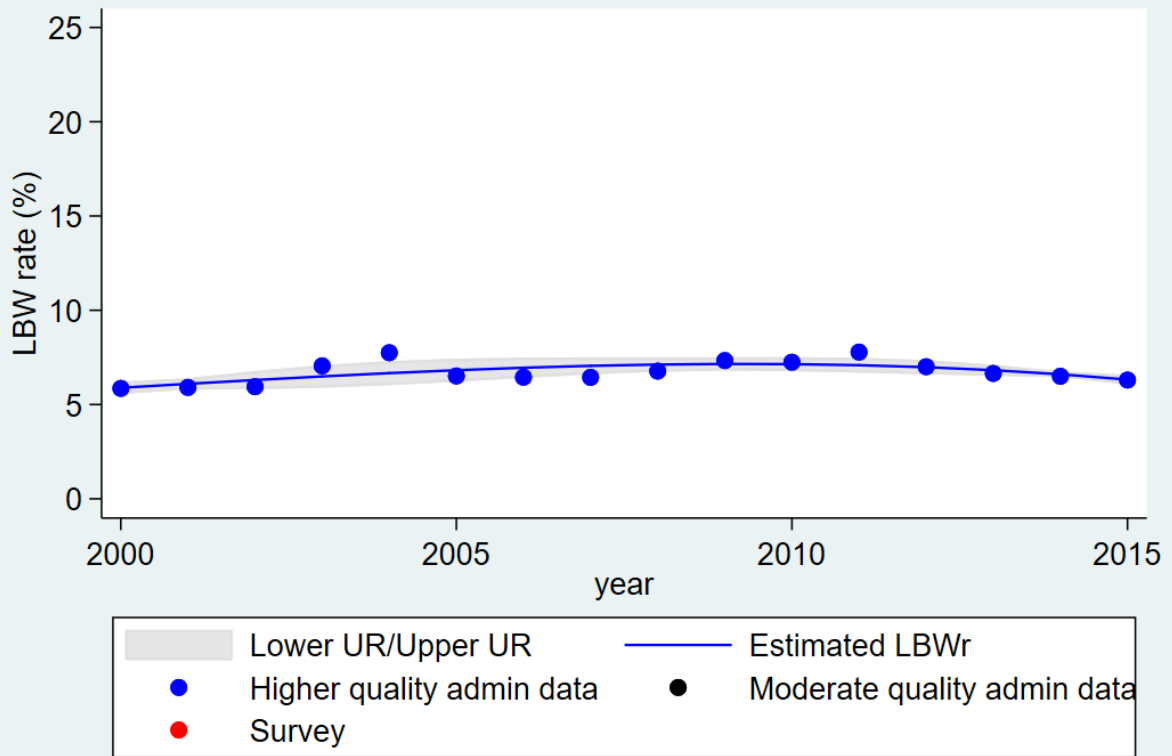

### Mauritius

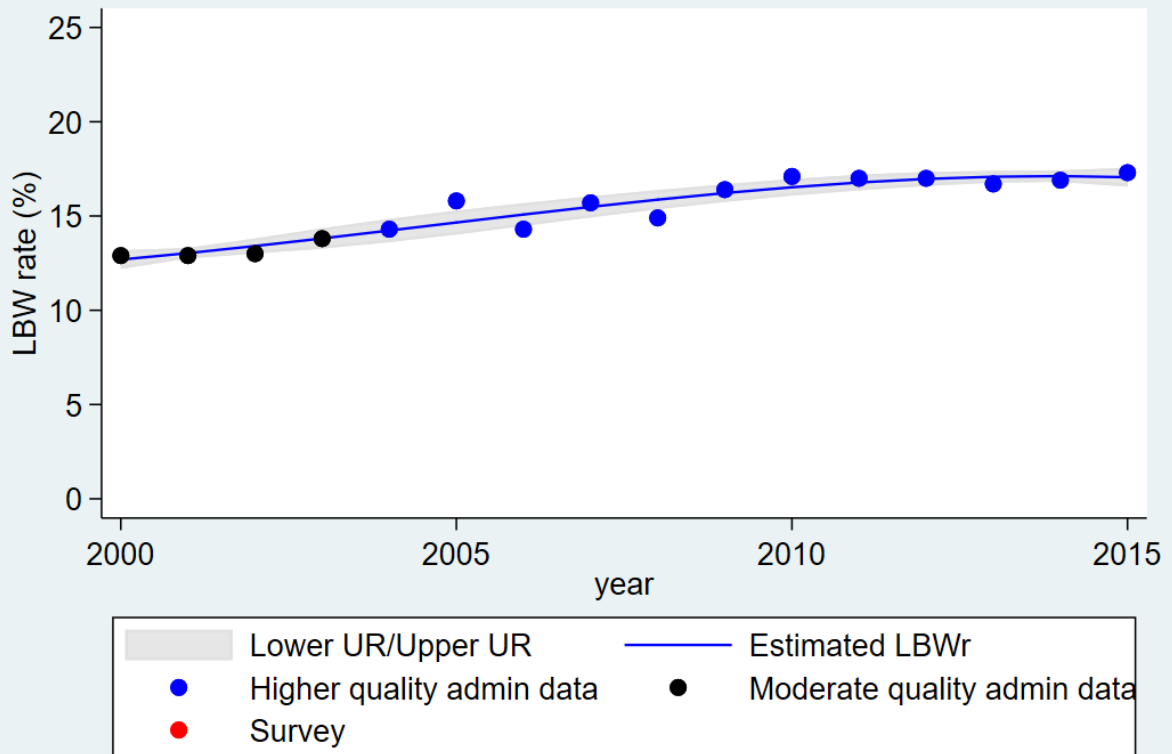

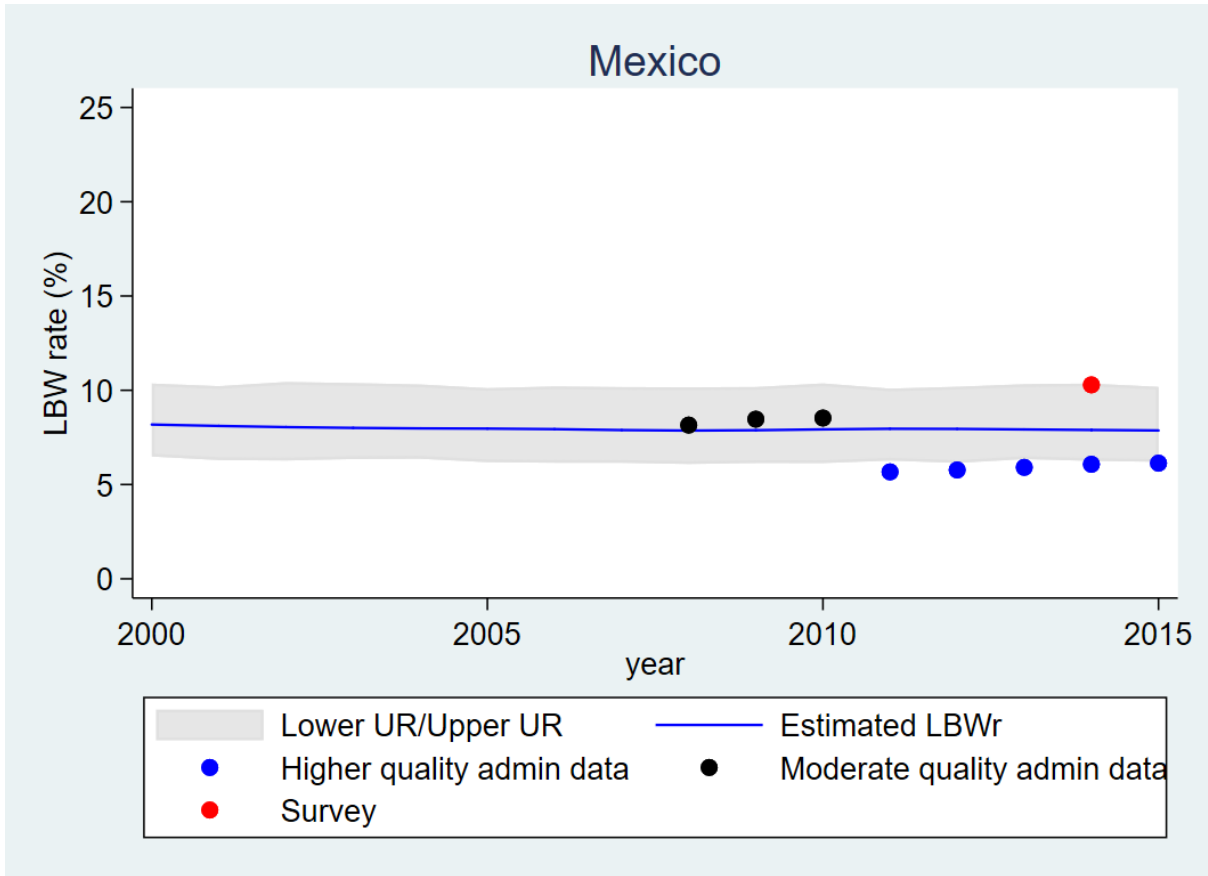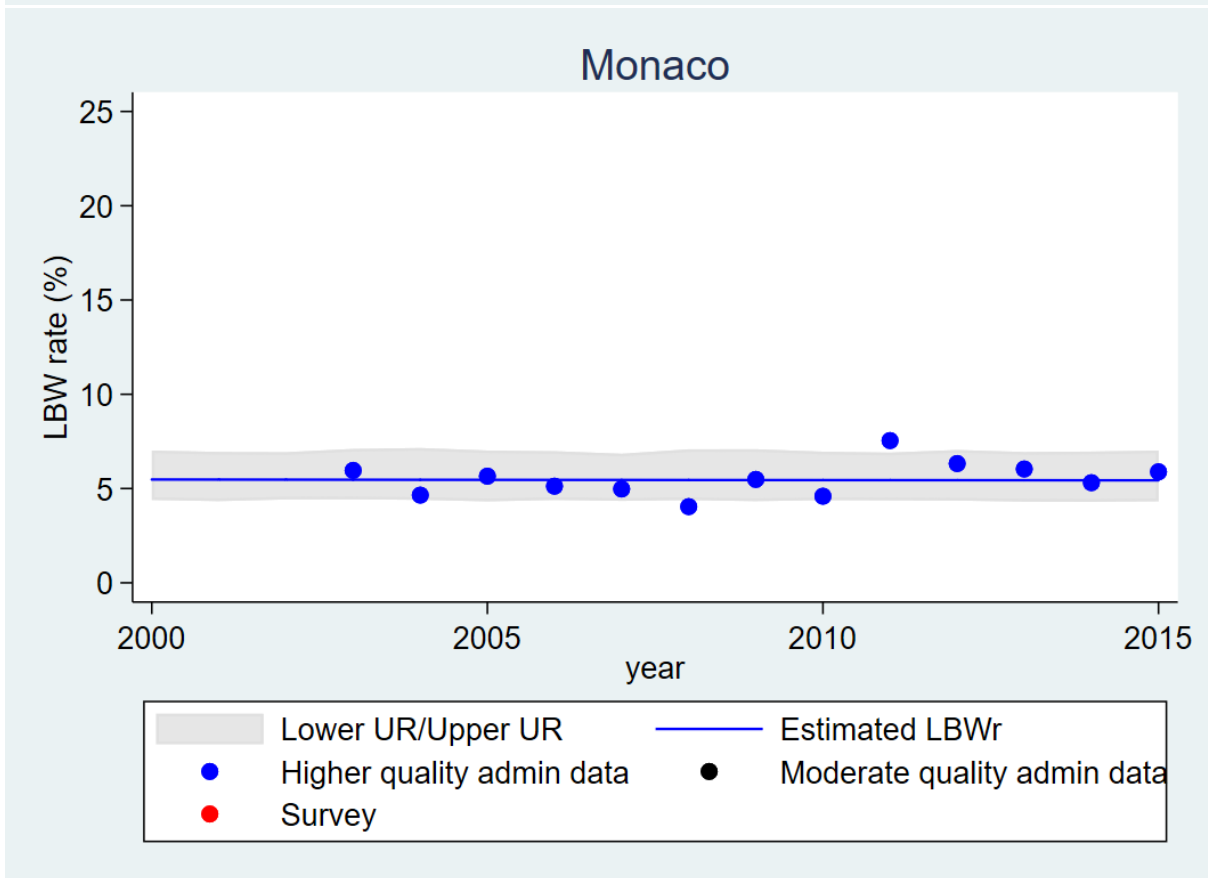

## Mongolia

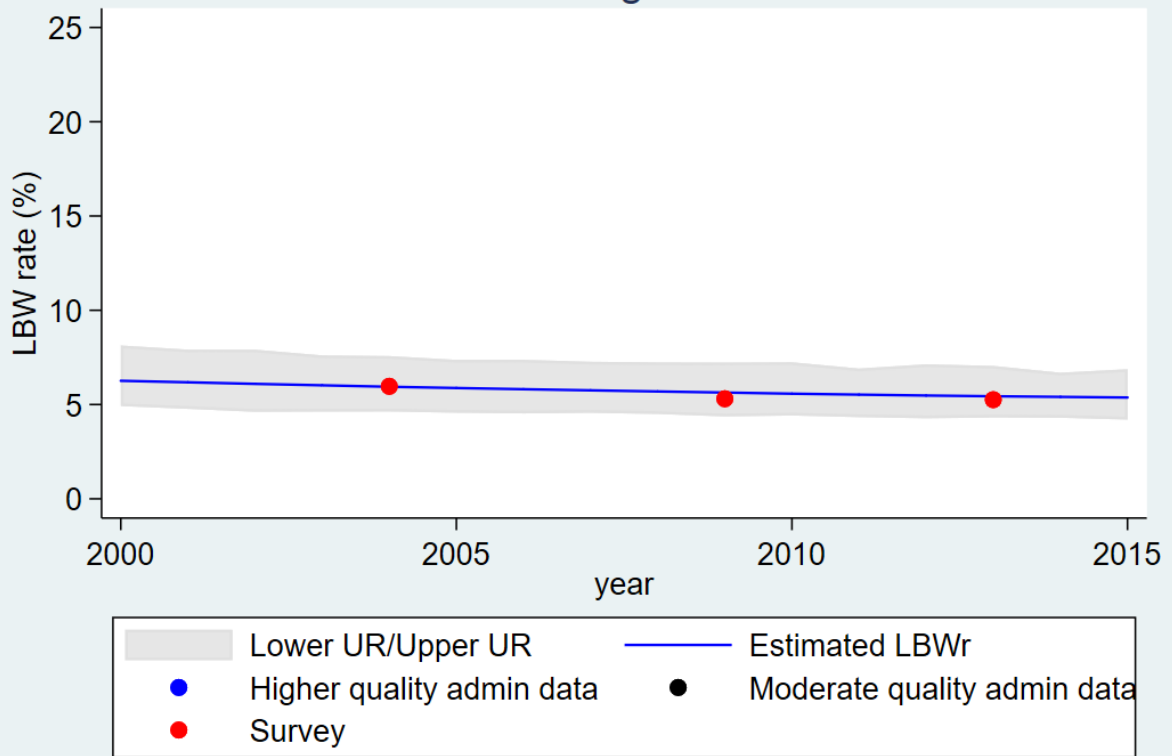

## Montenegro

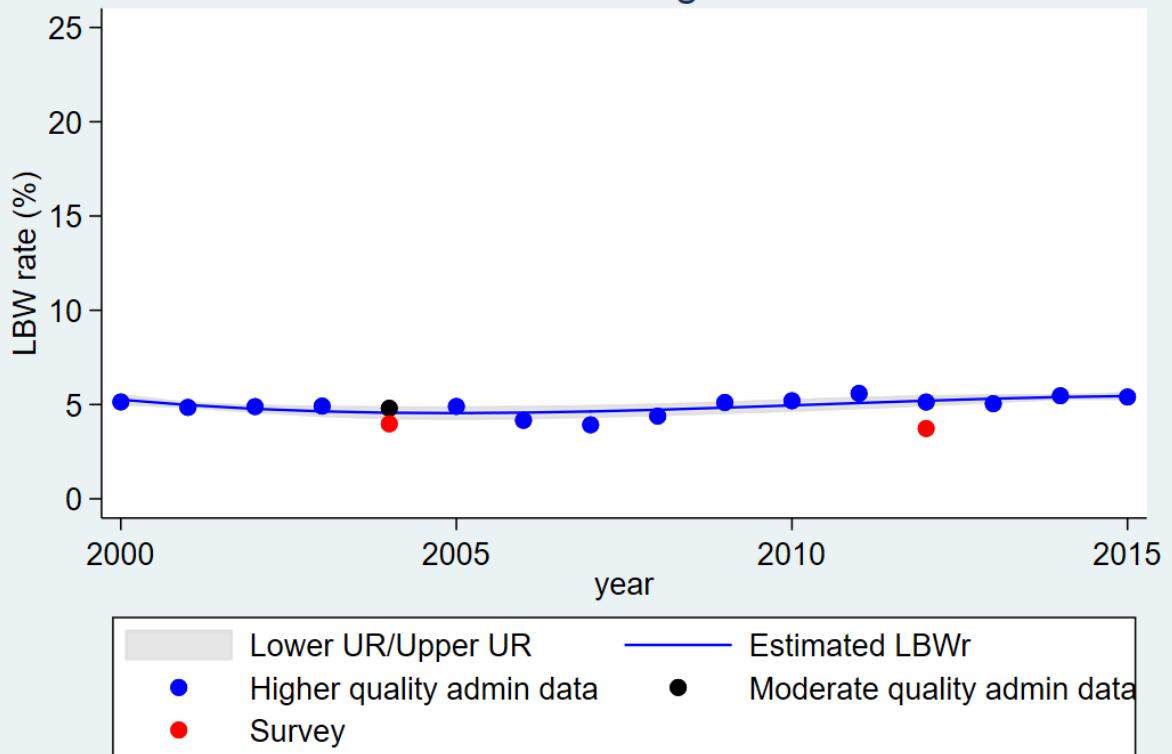

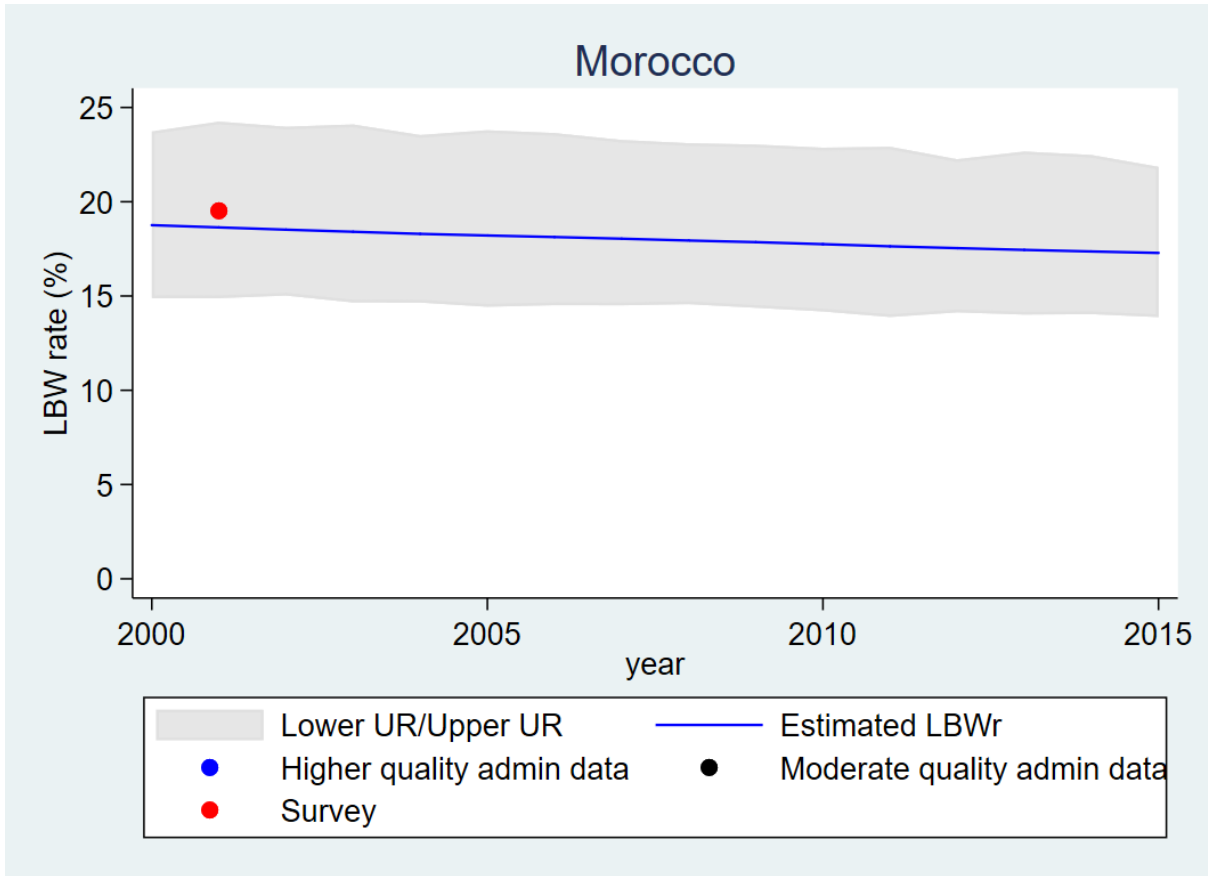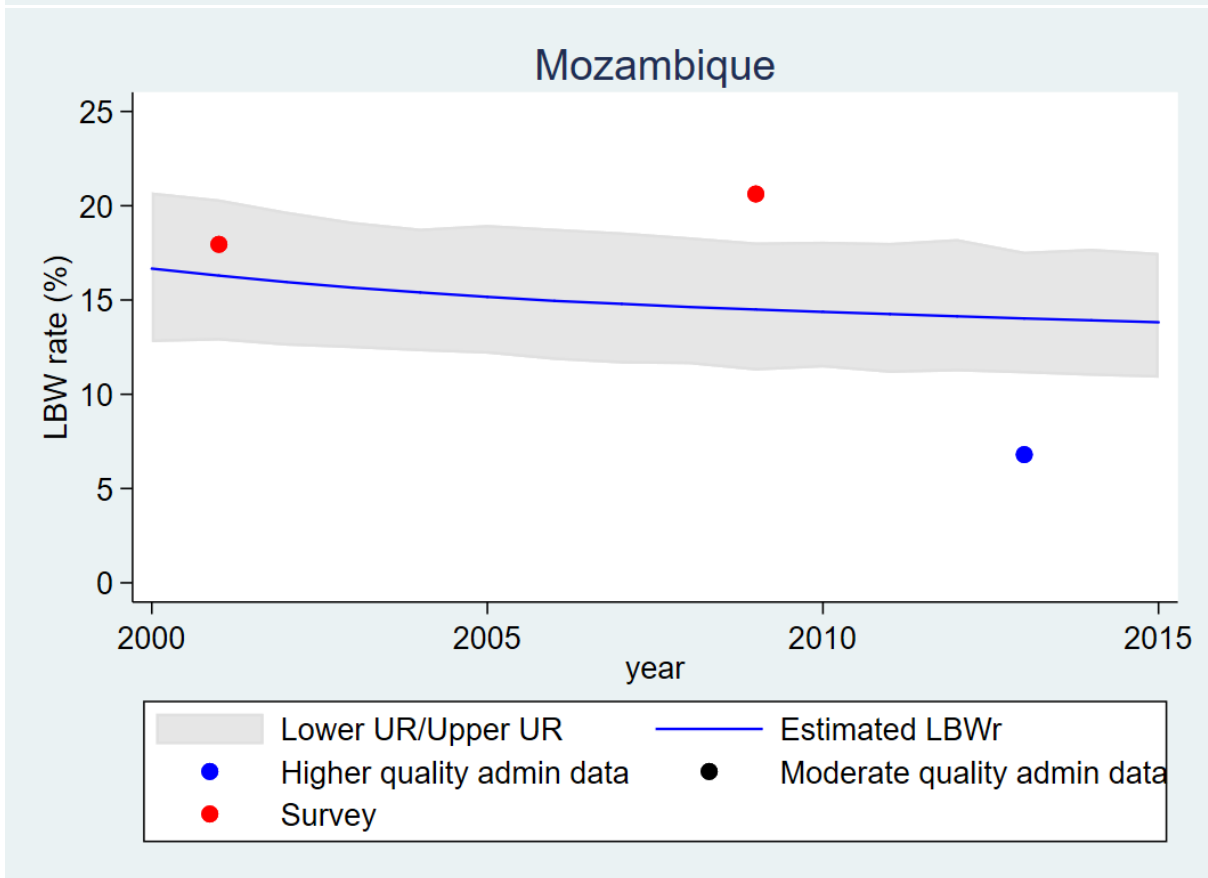

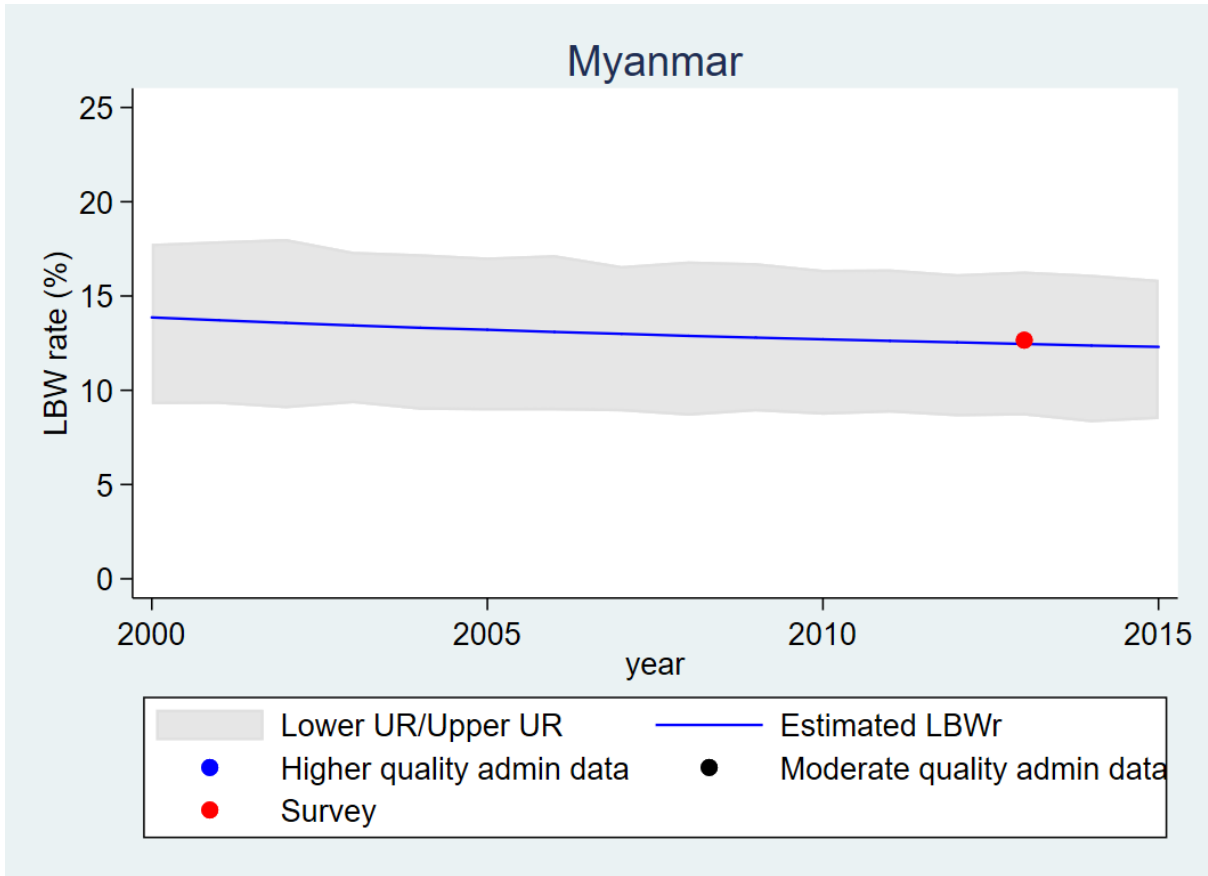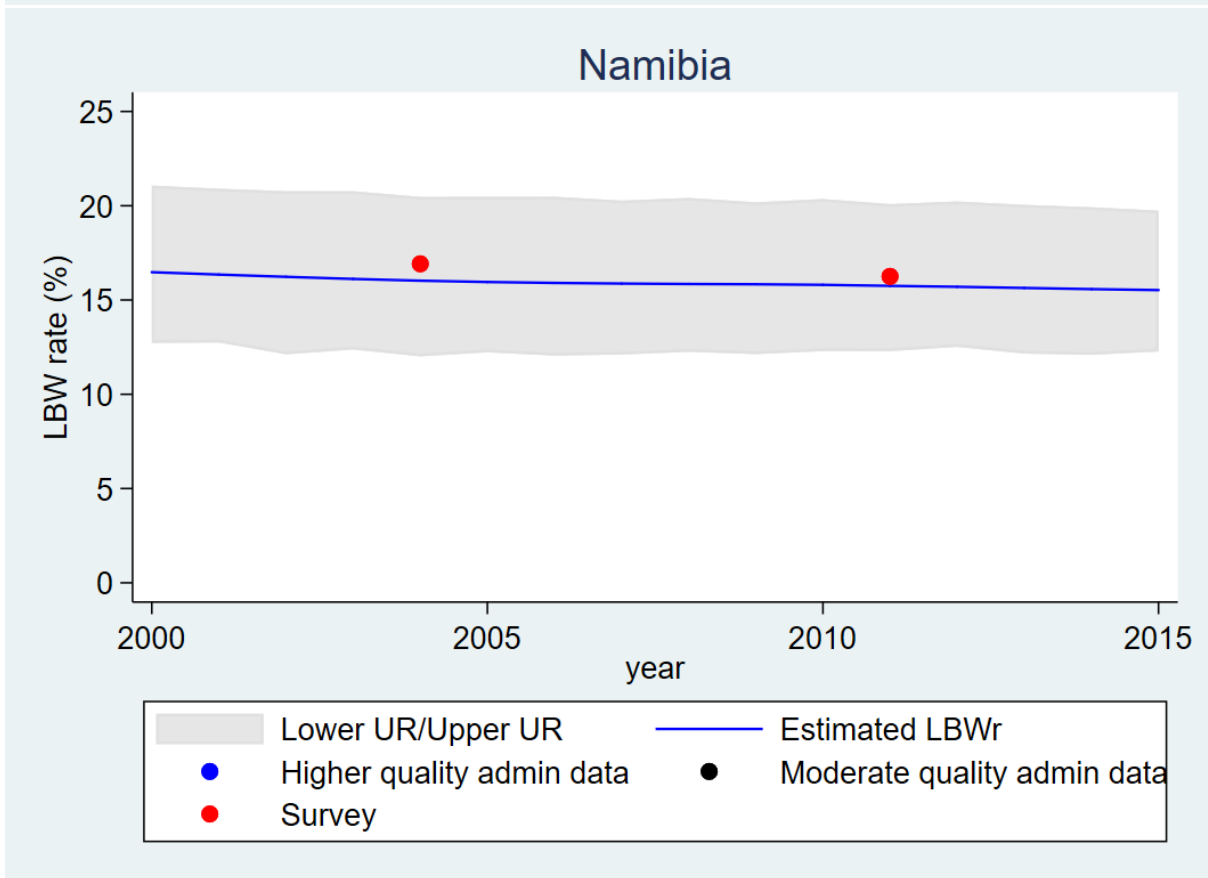

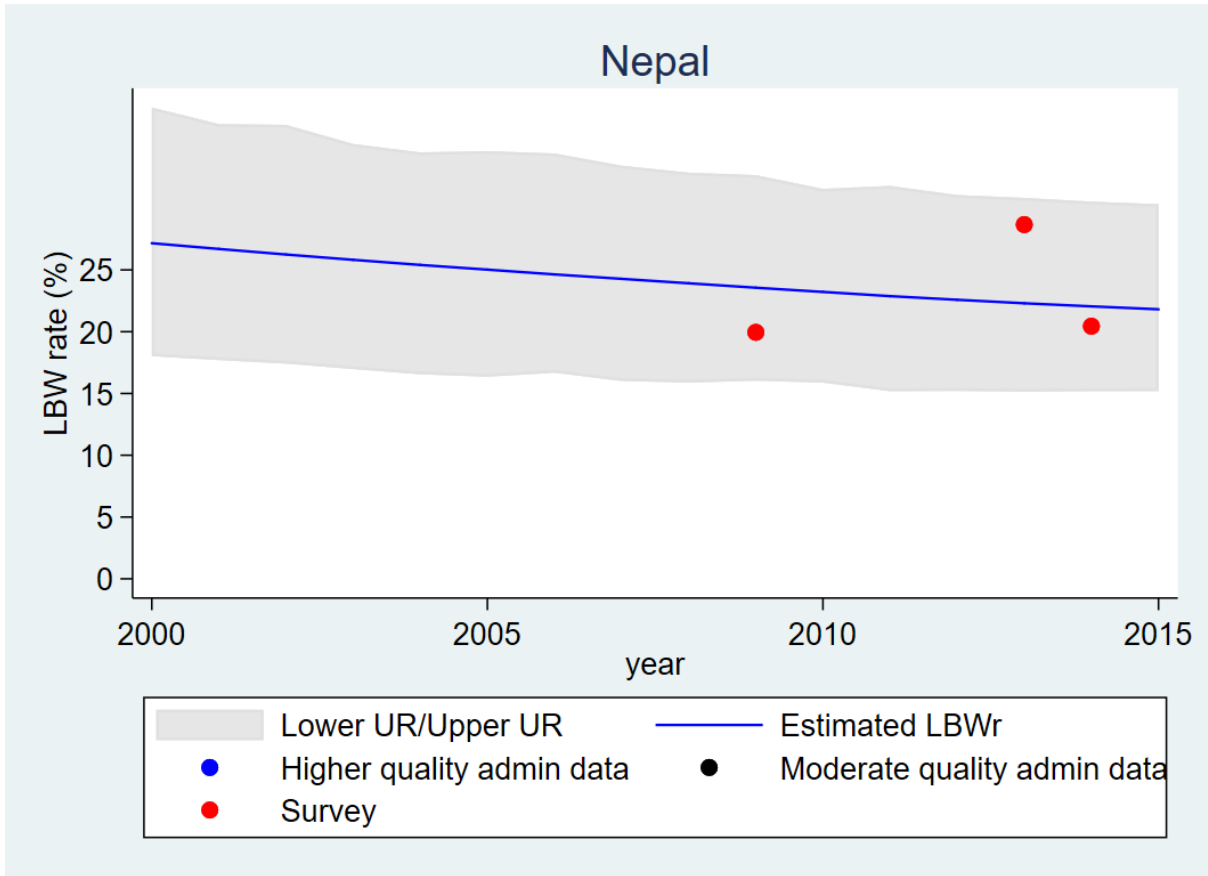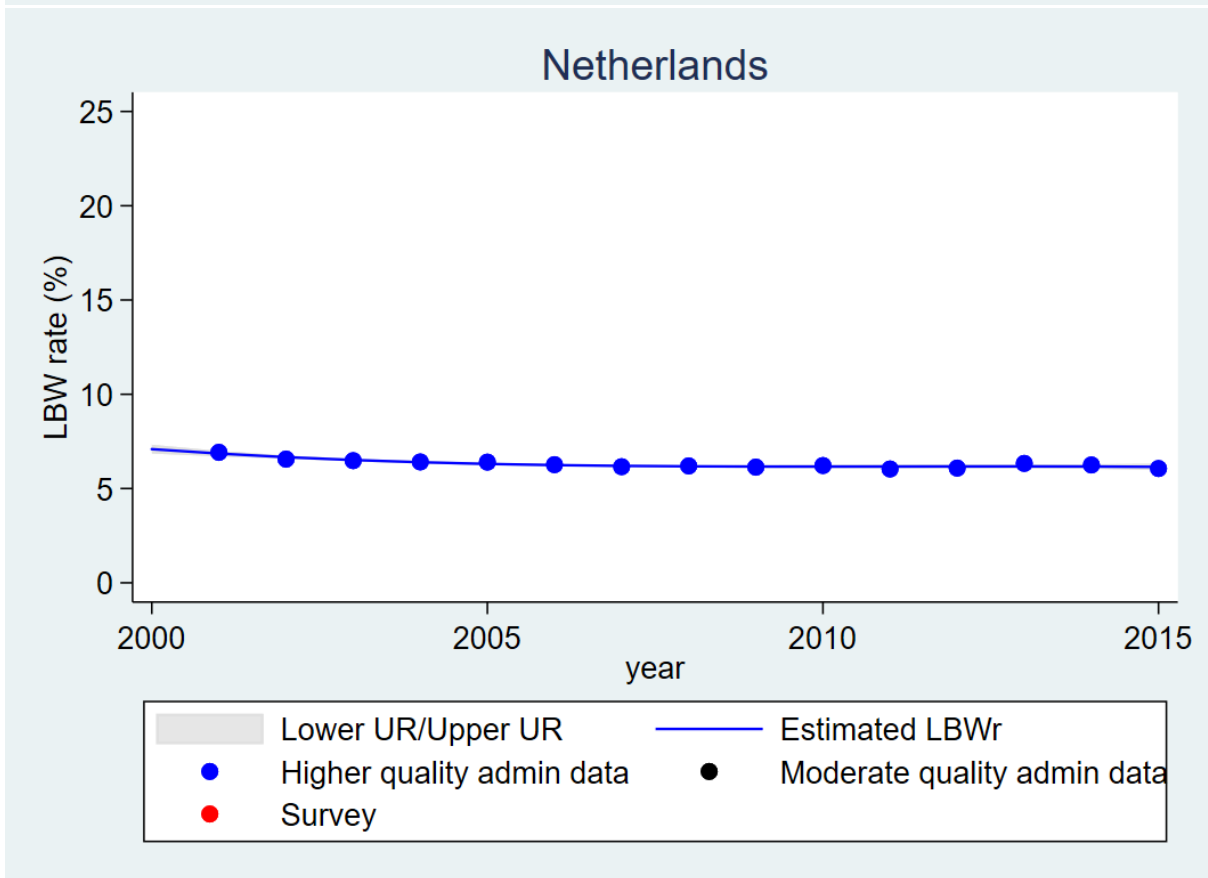

## New Zealand

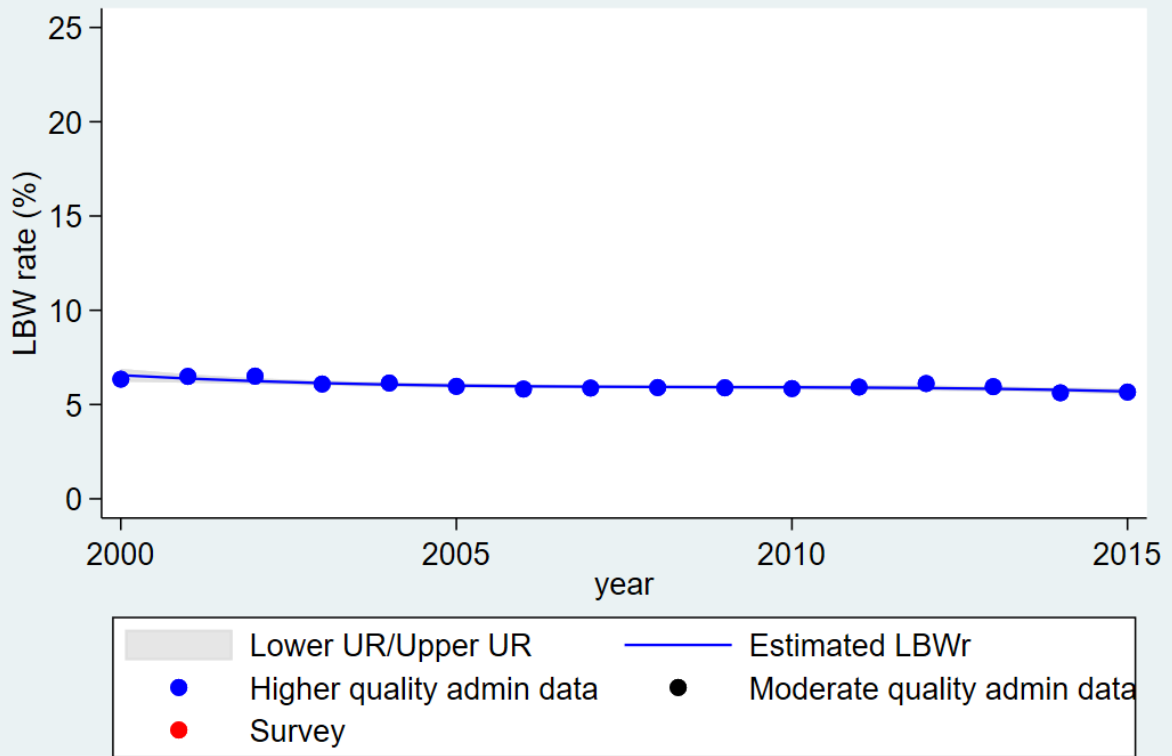

## Norway

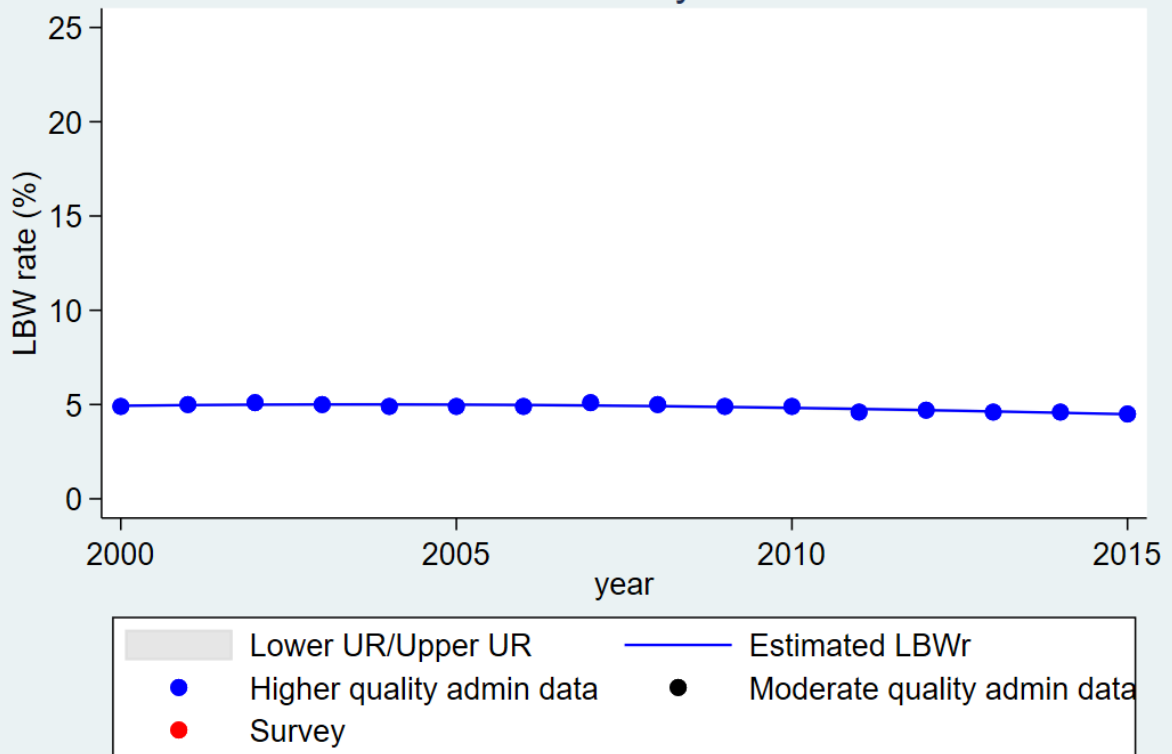



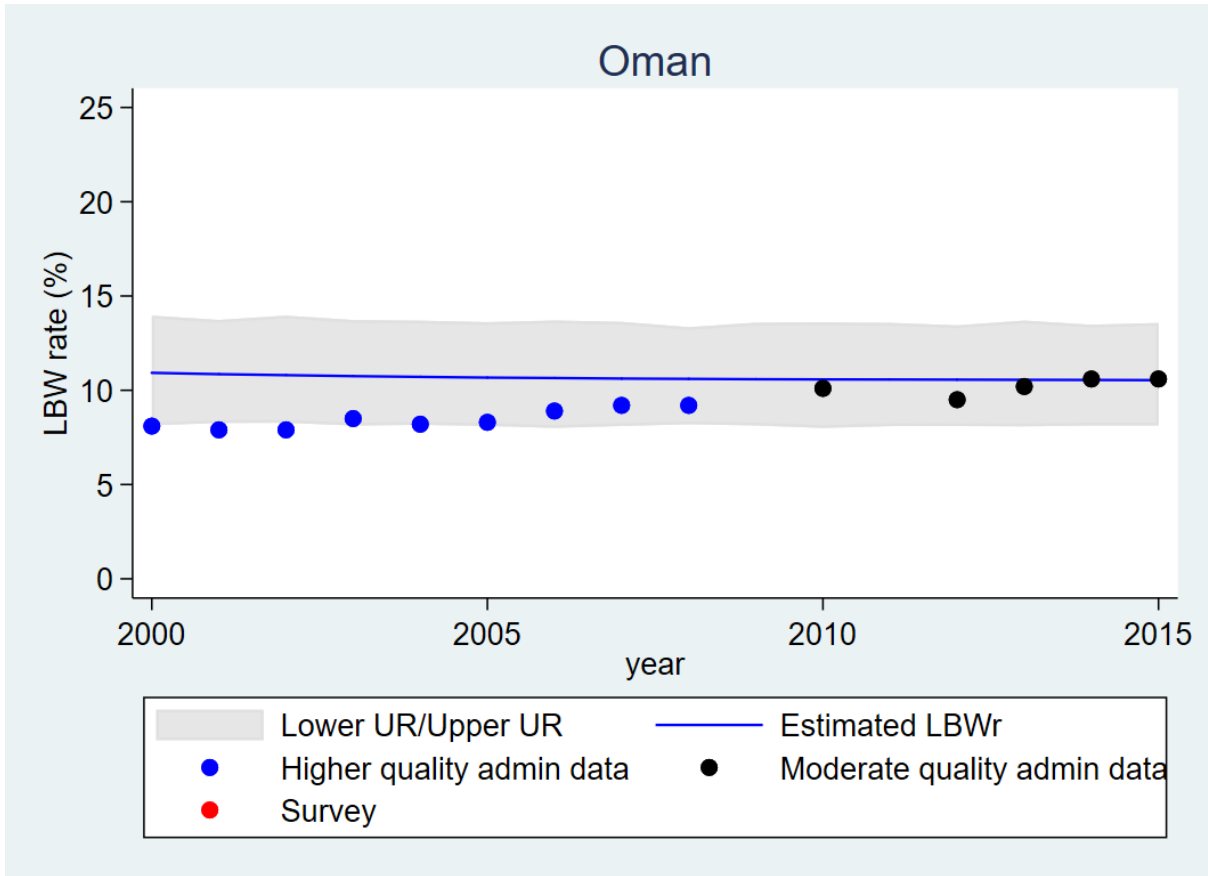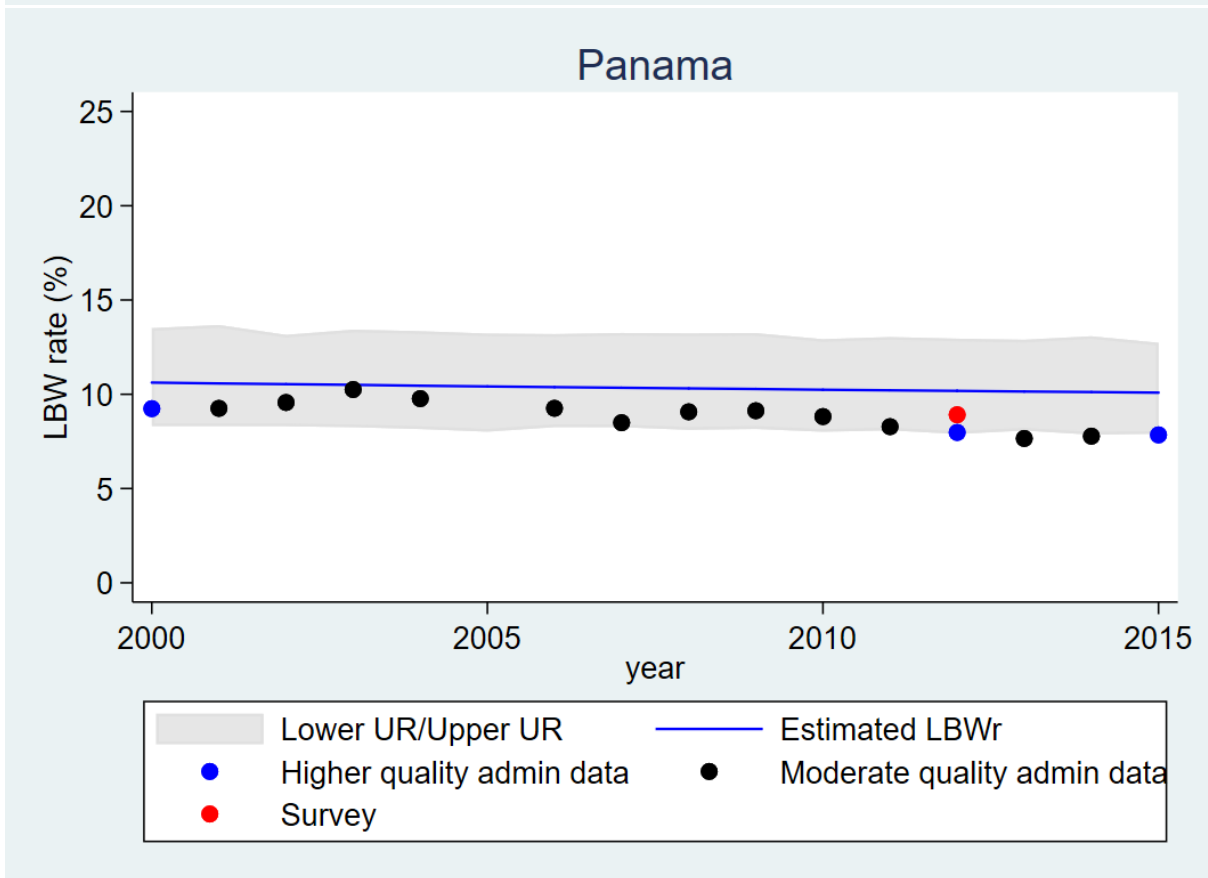

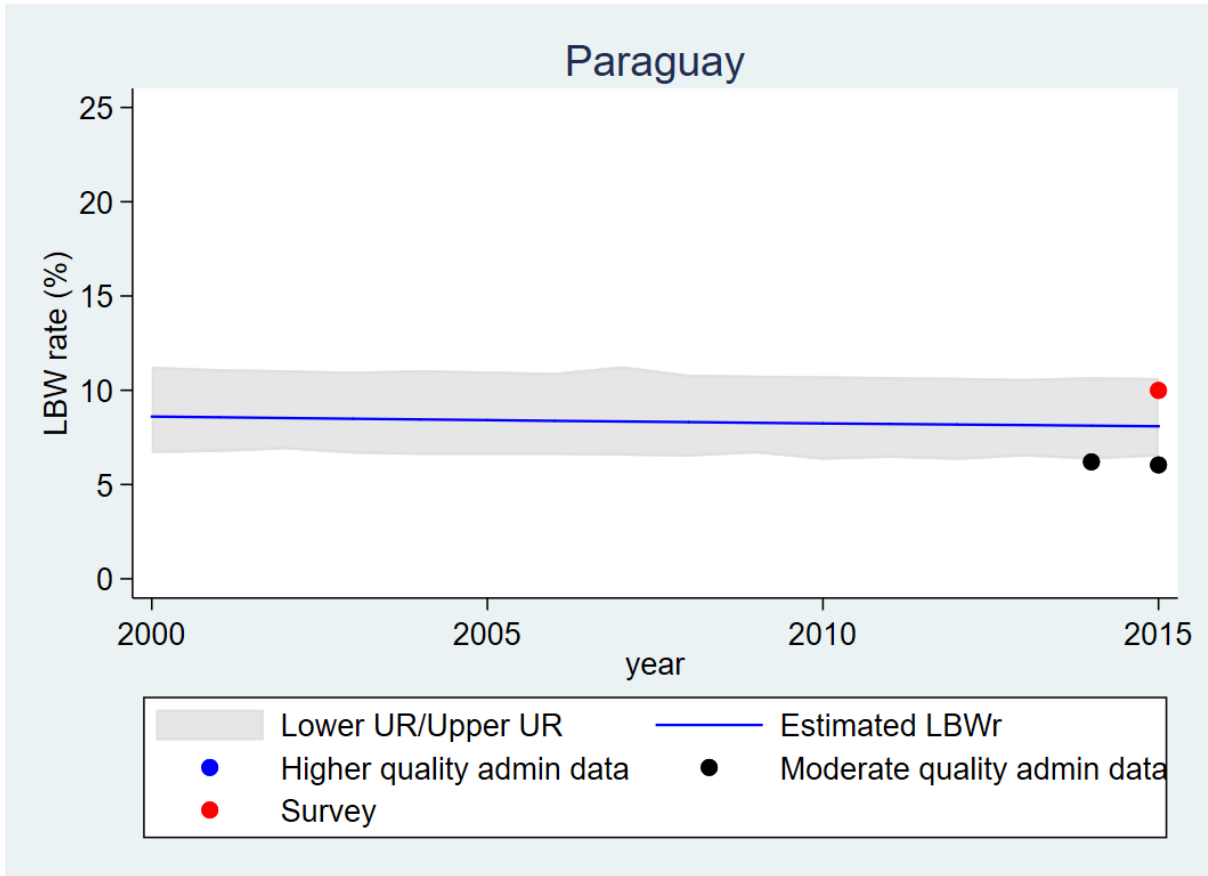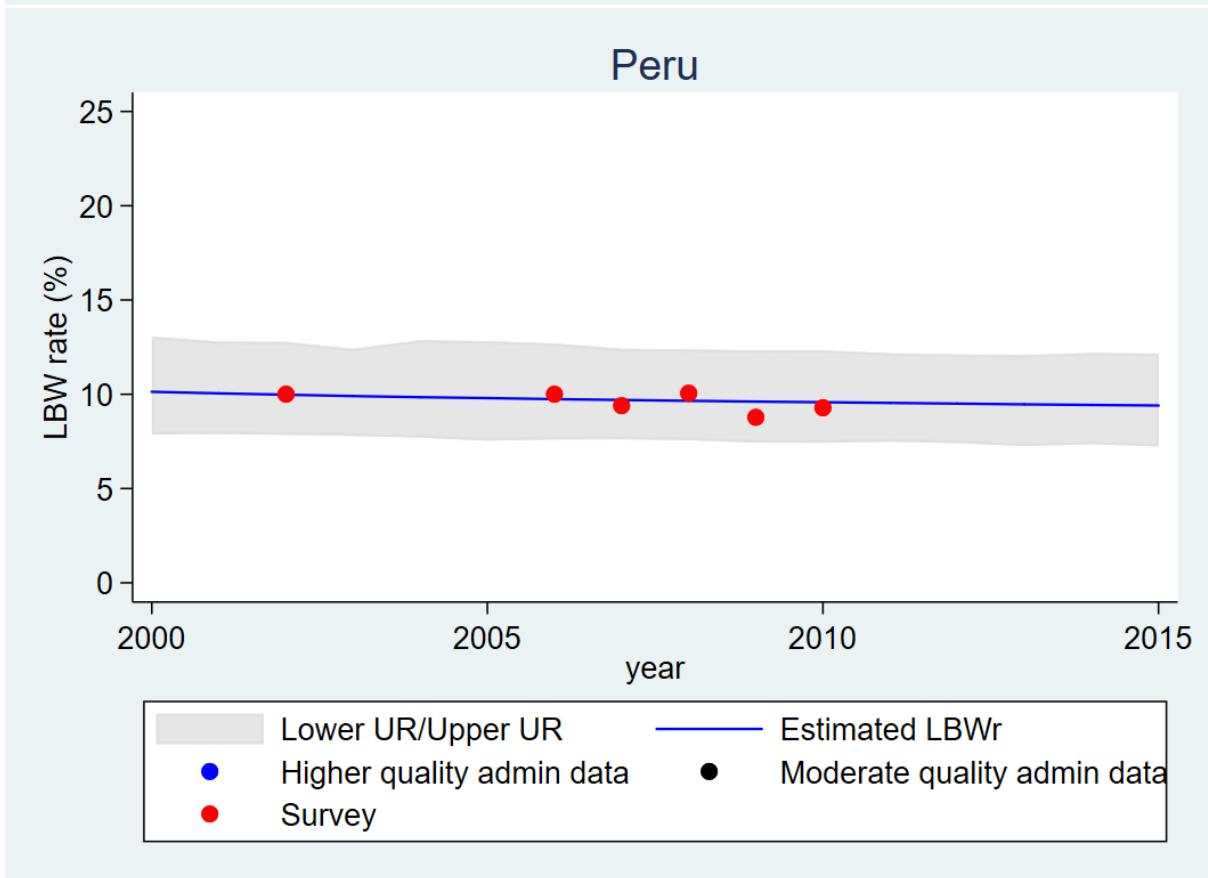

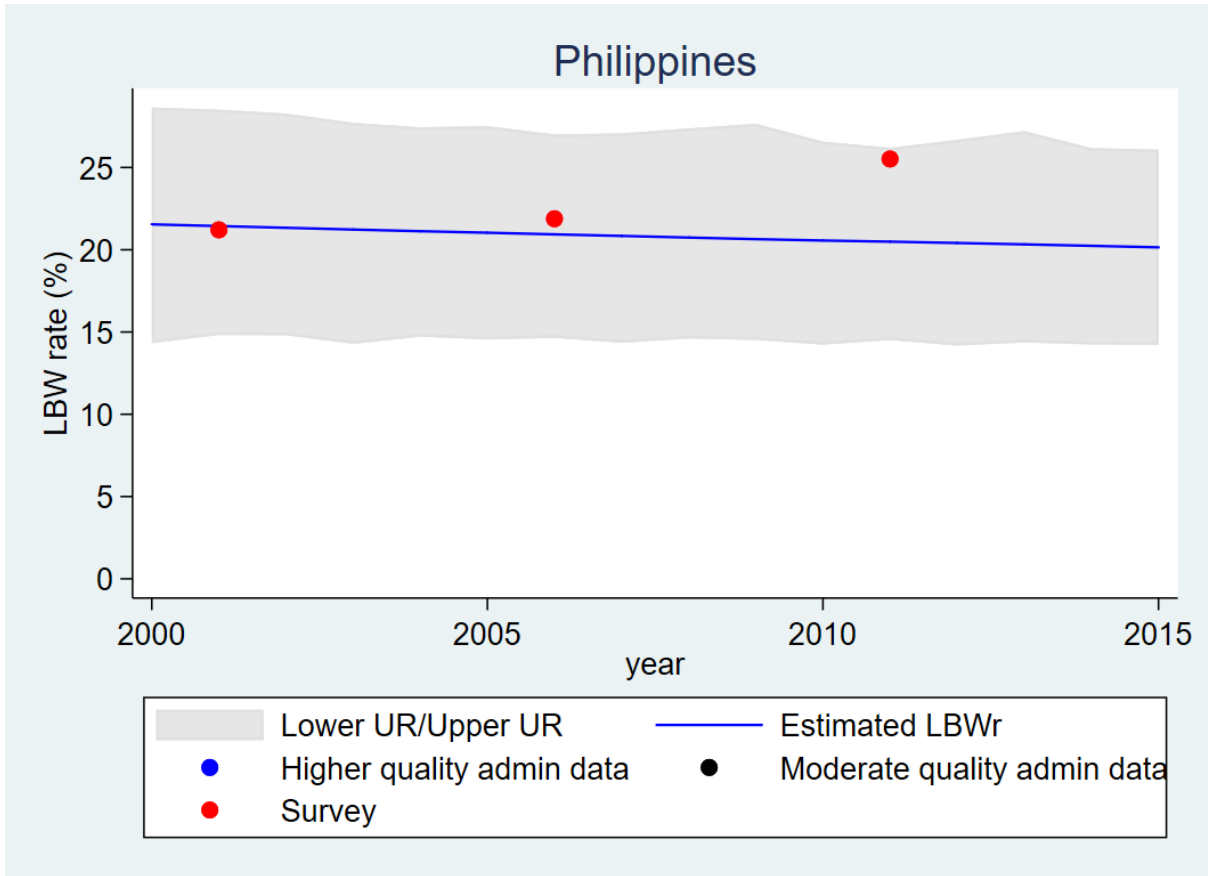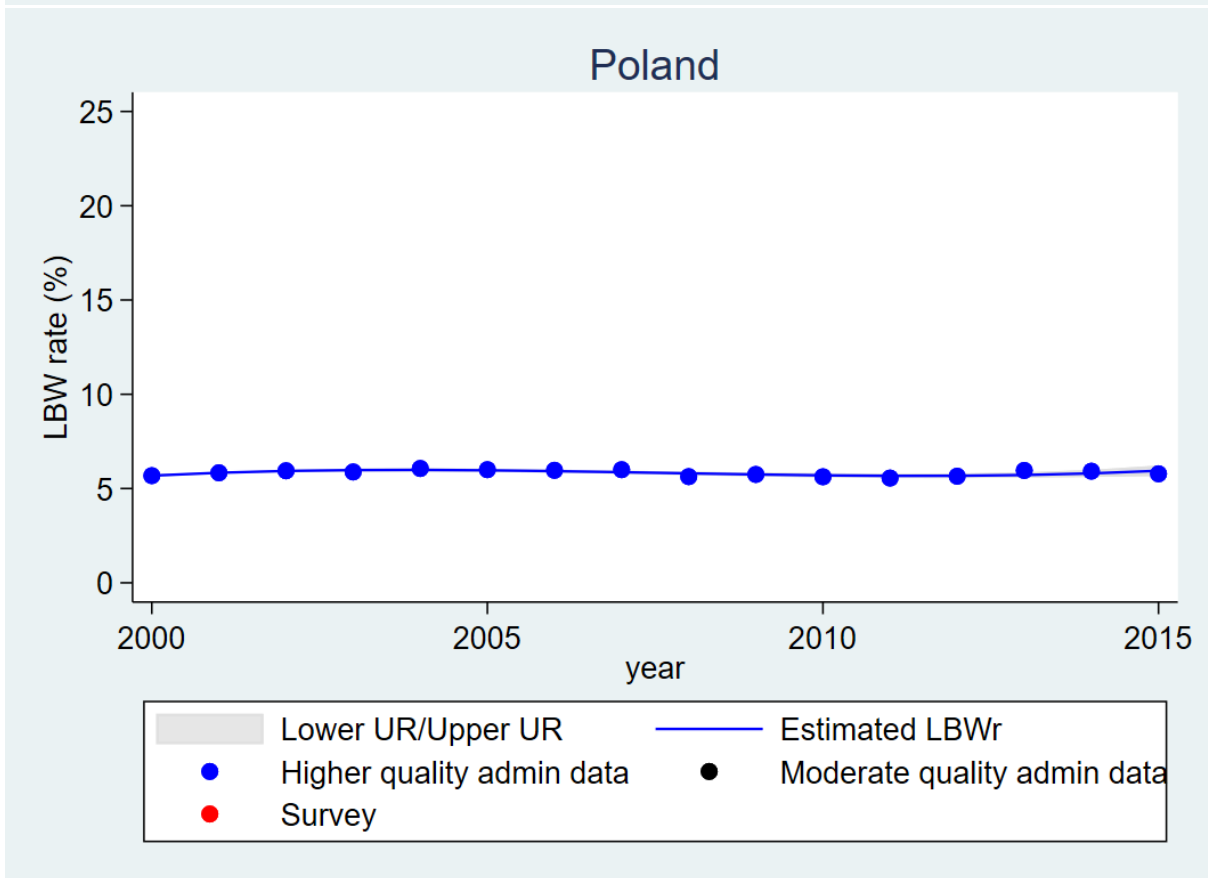

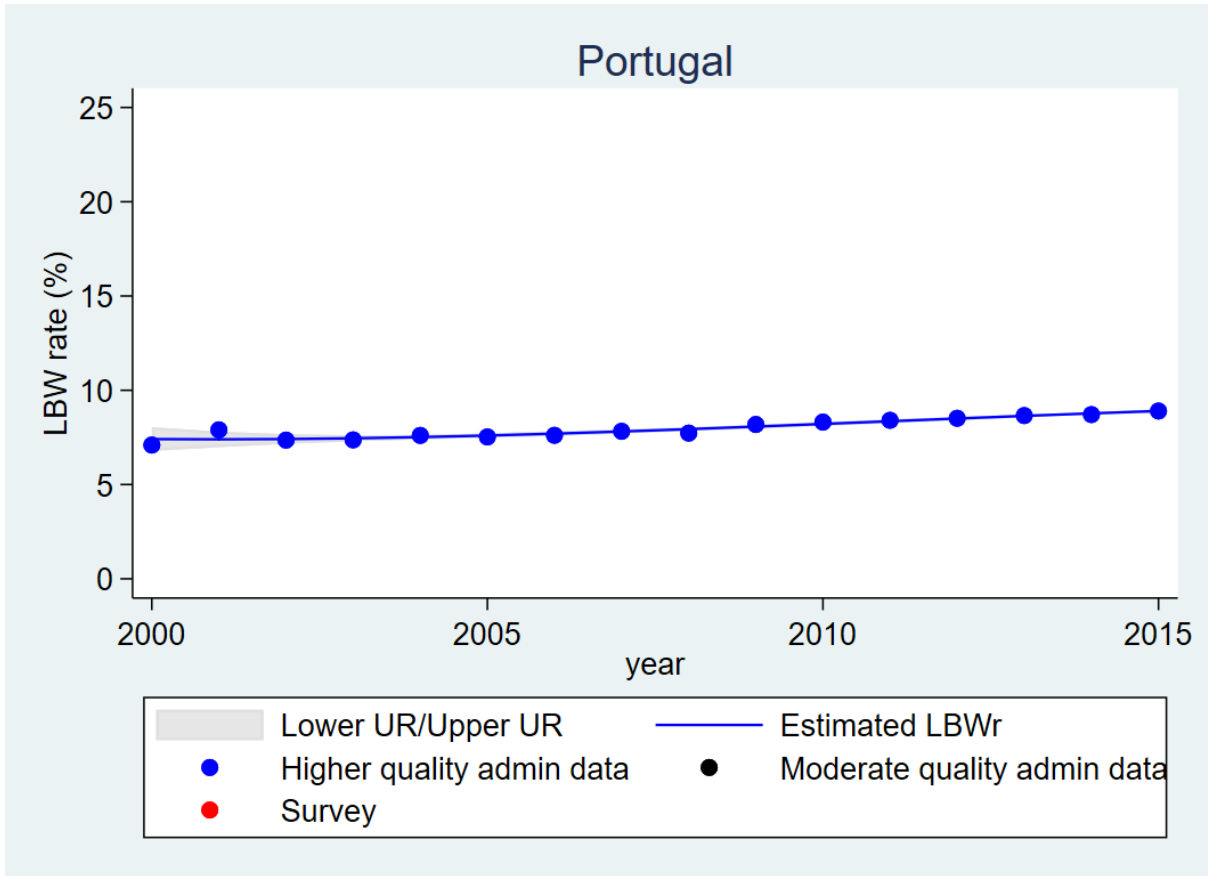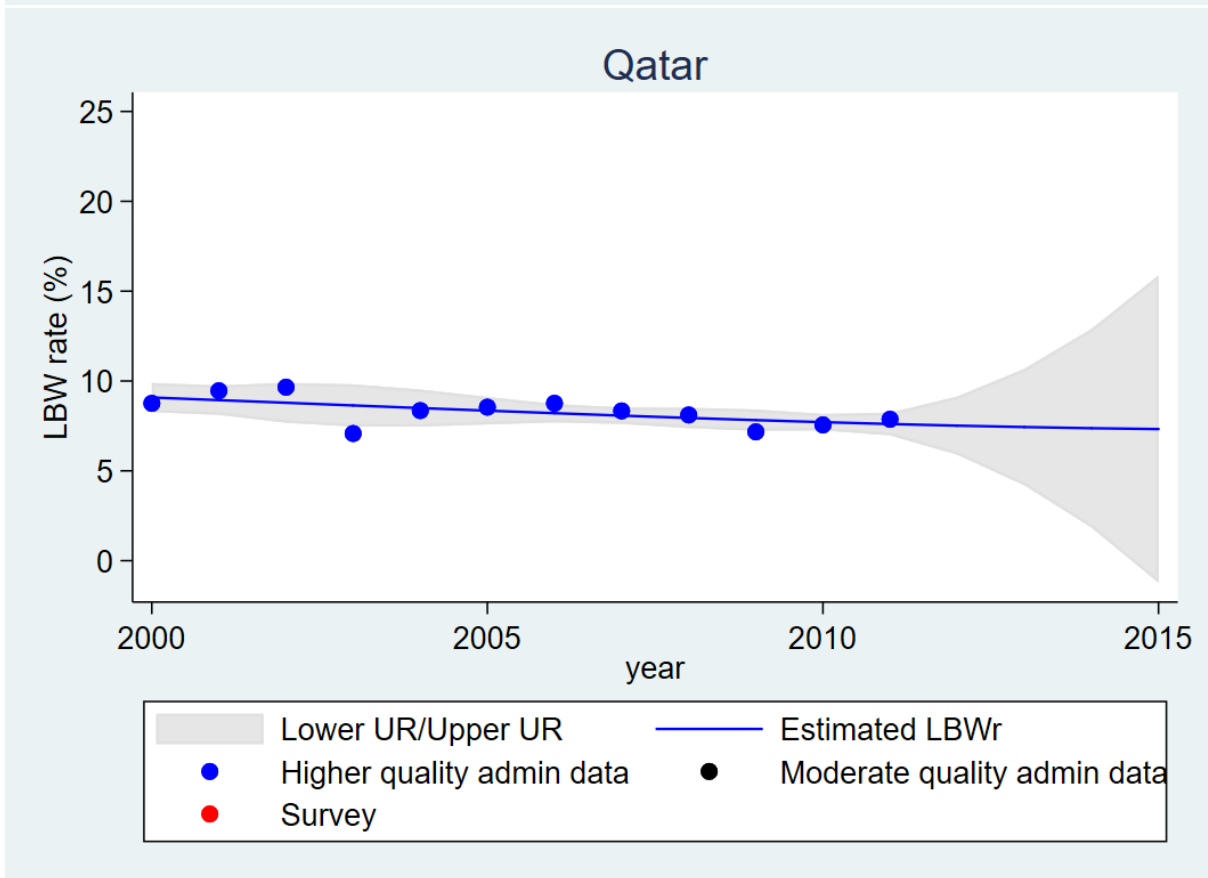

### Republic of Korea

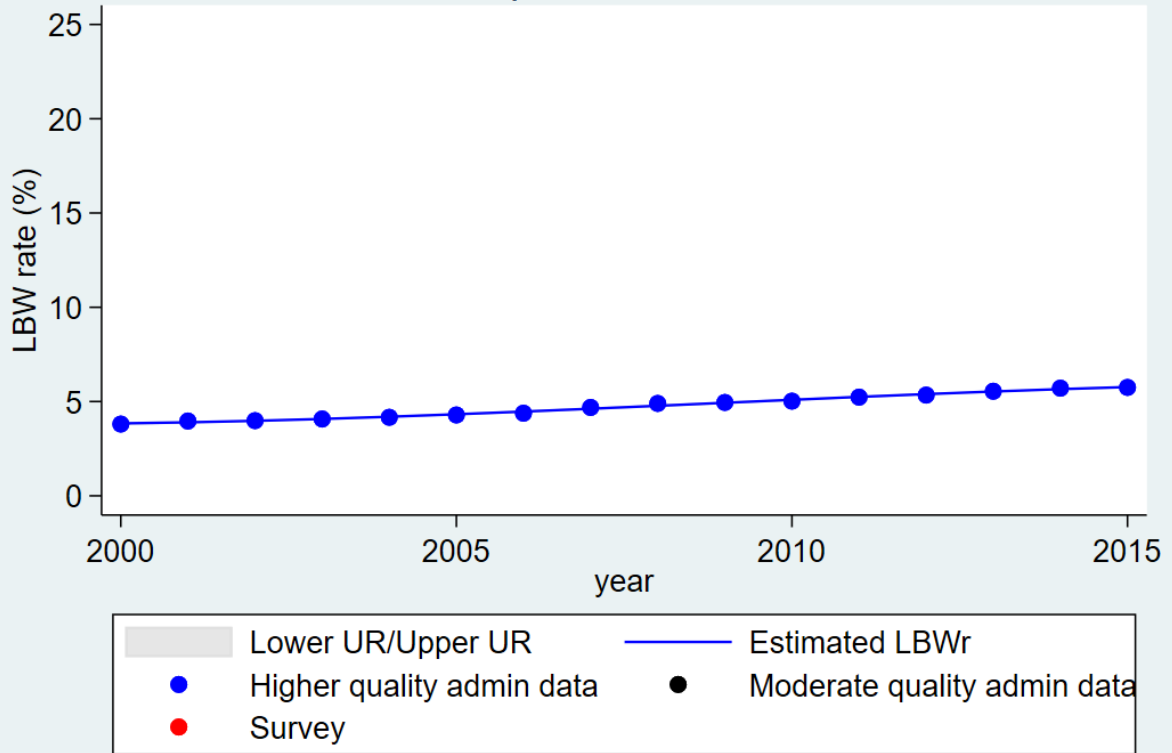

### Republic of Moldova

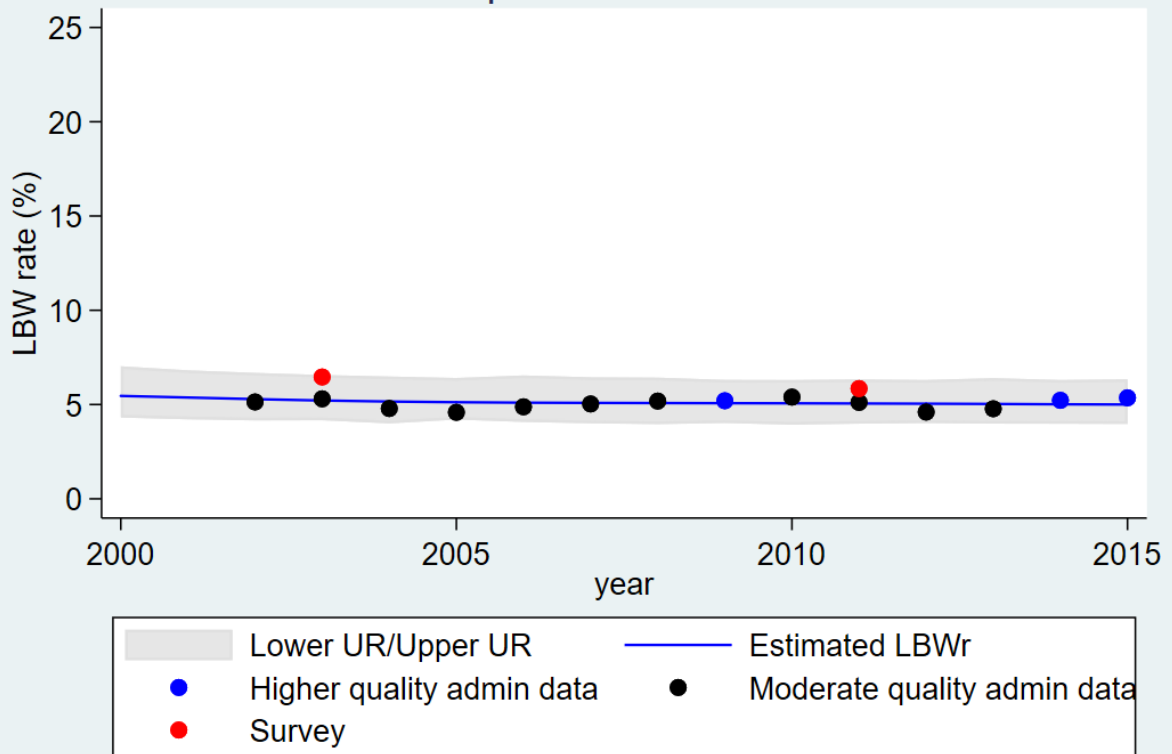

## Romania

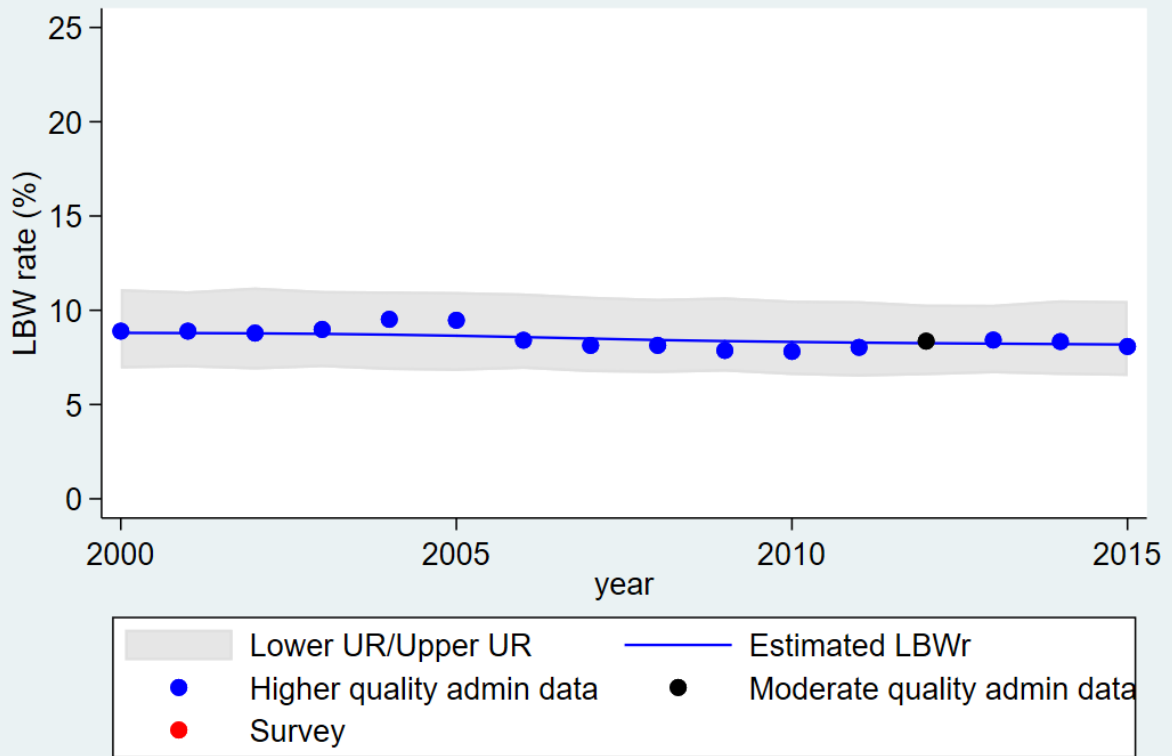

## Russian Federation

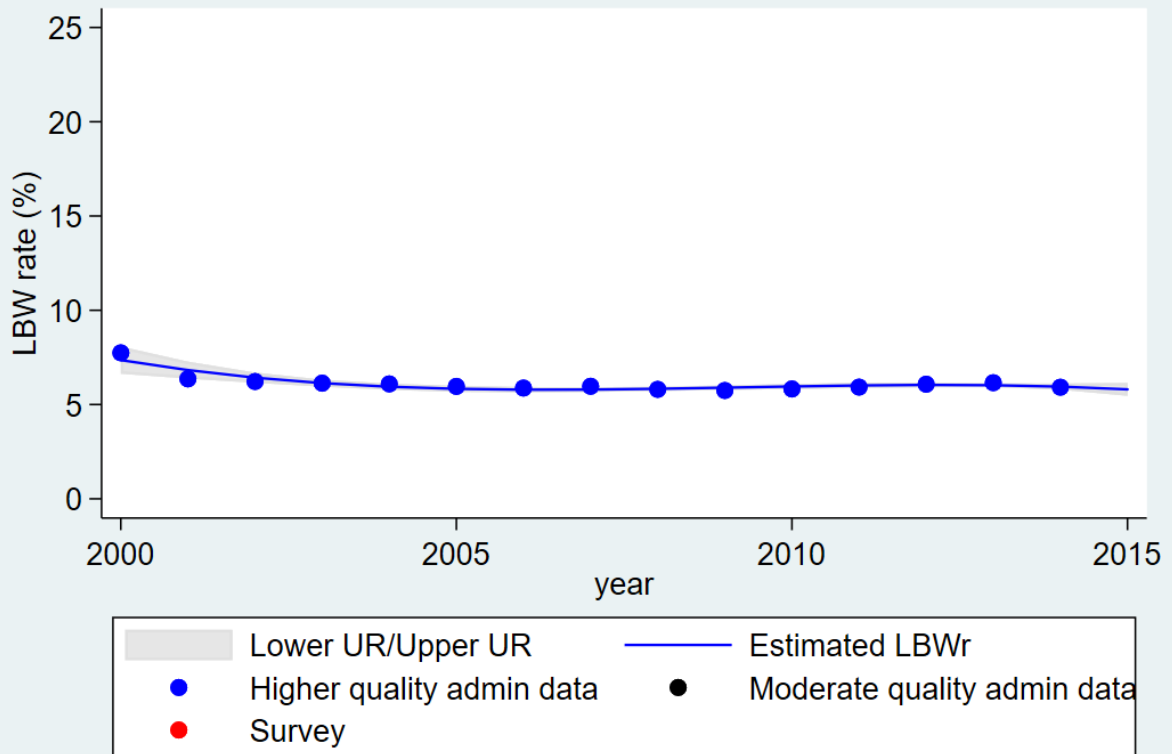

## Rwanda

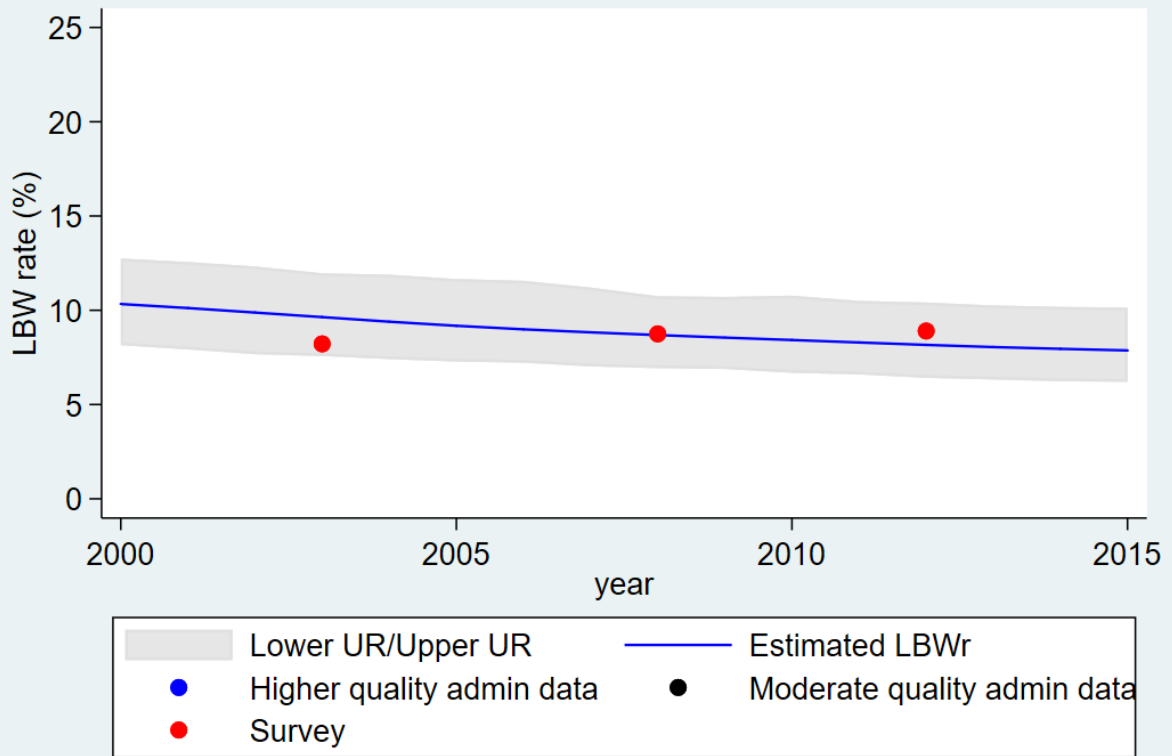

## San Marino

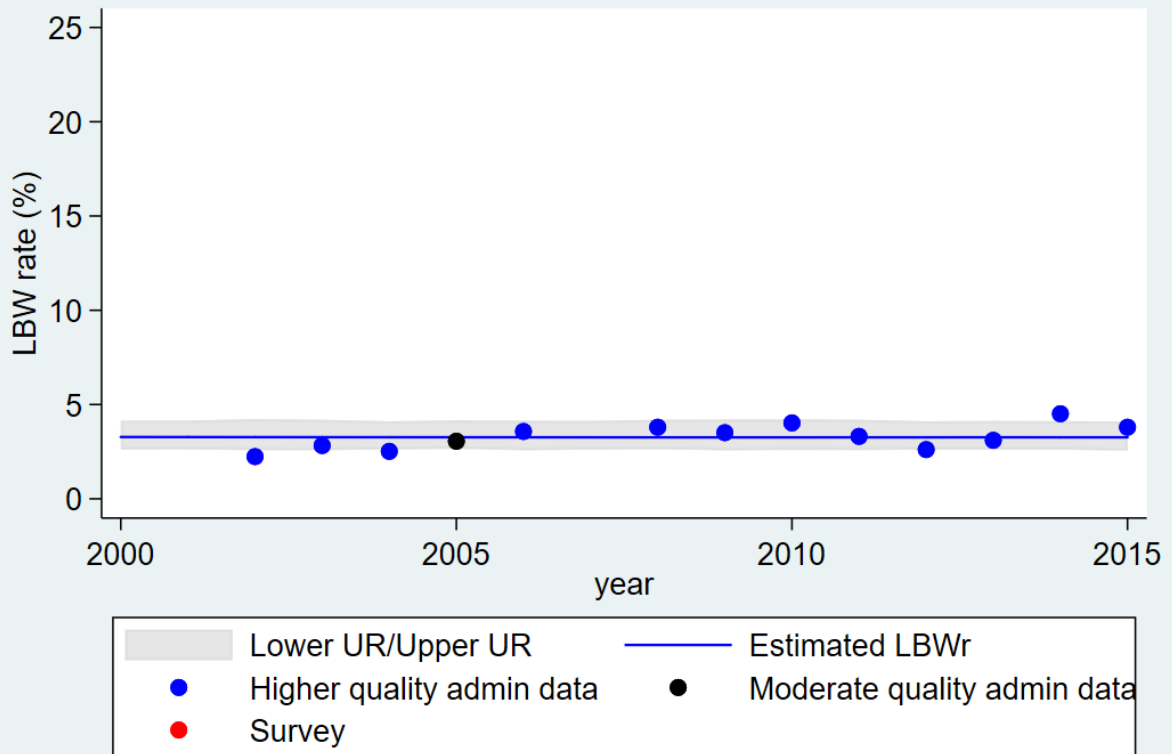

### Sao Tome and Principe

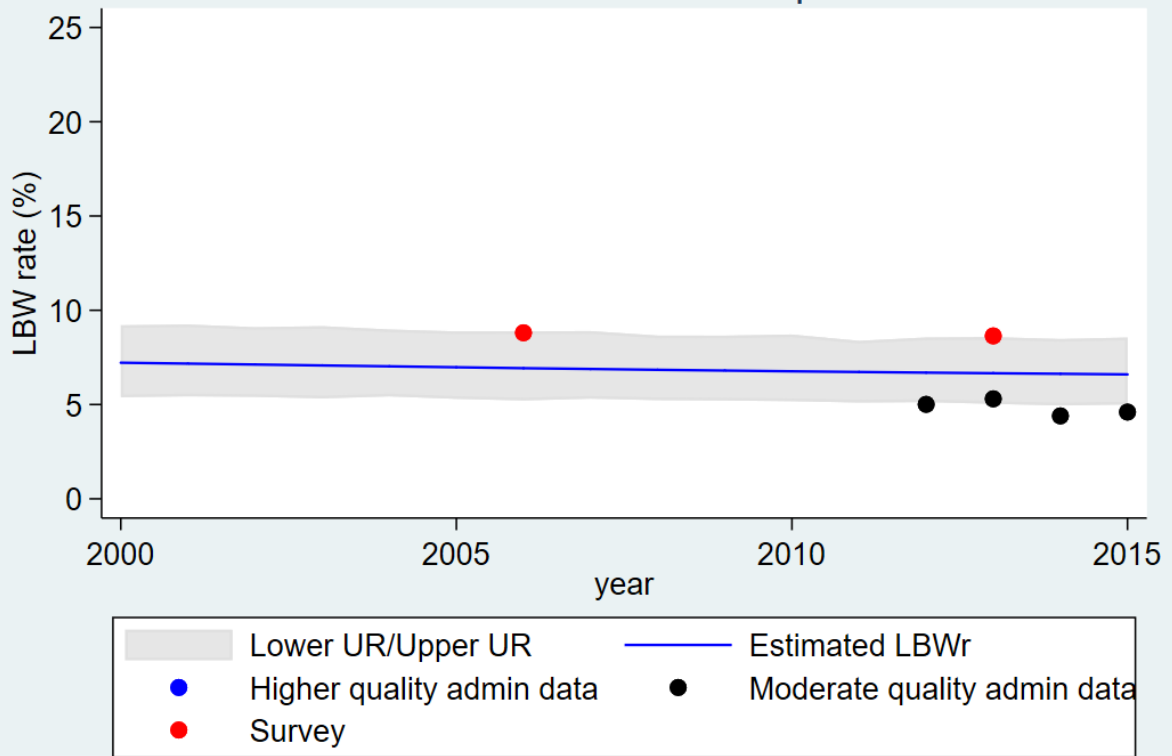

### Senegal

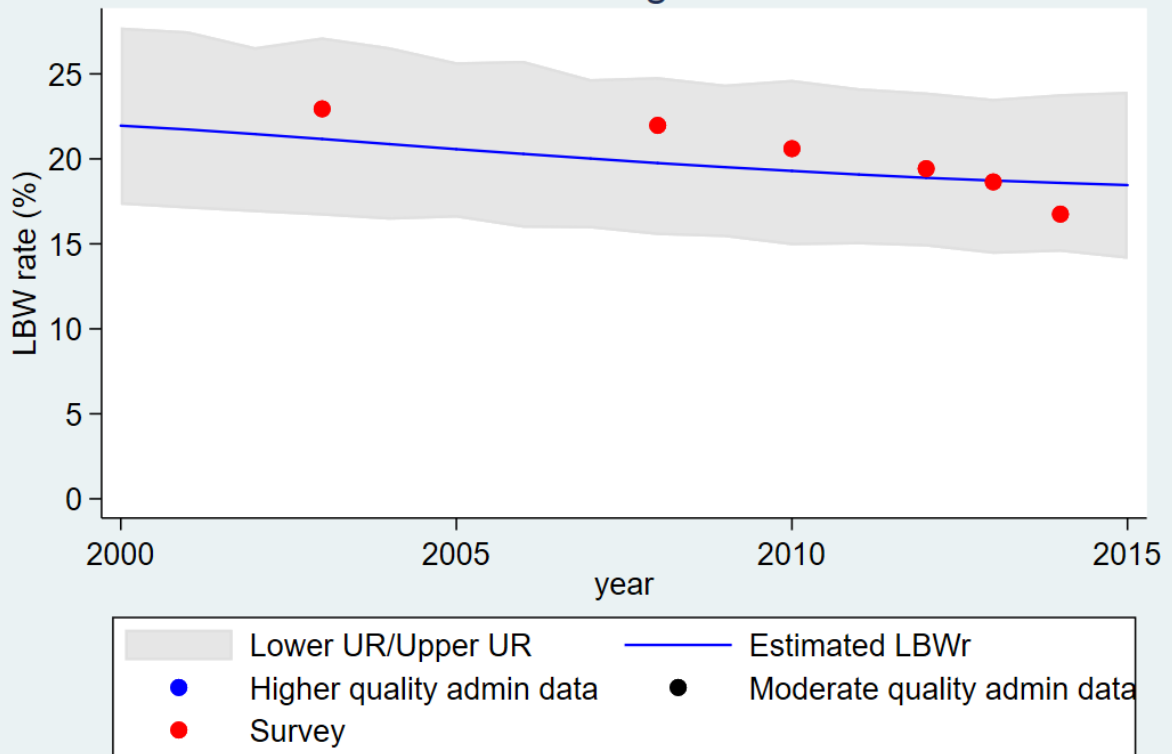



### Serbia

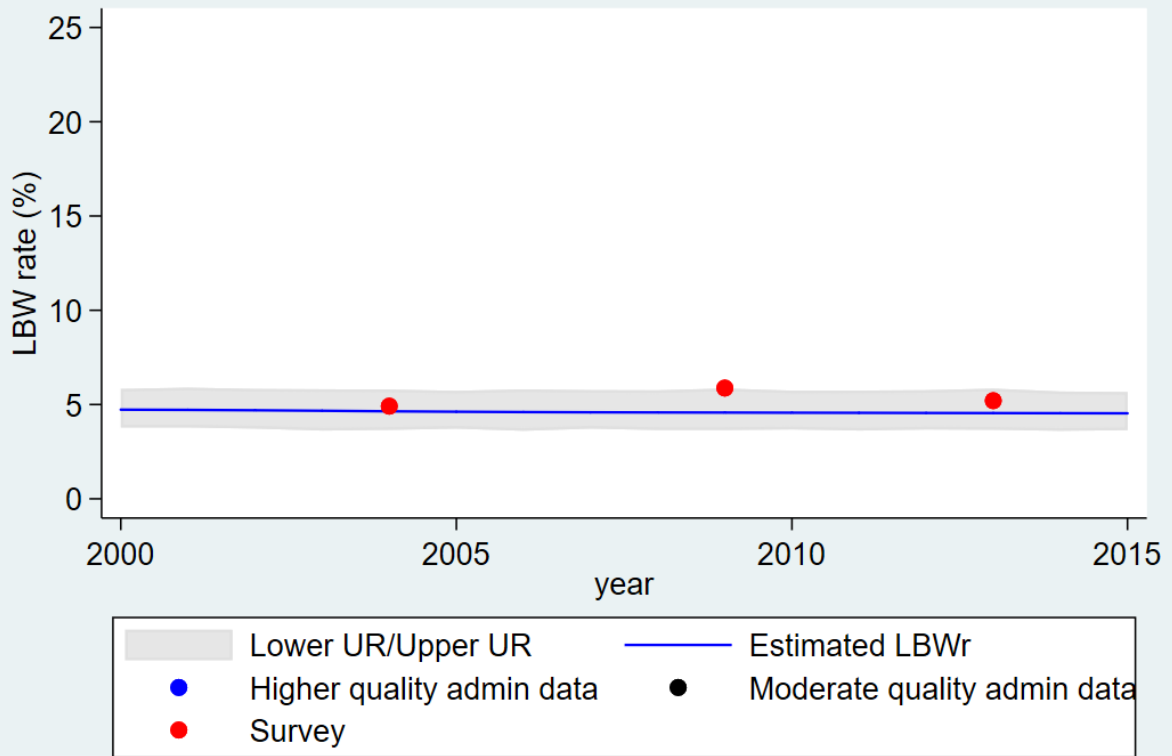

### Seychelles

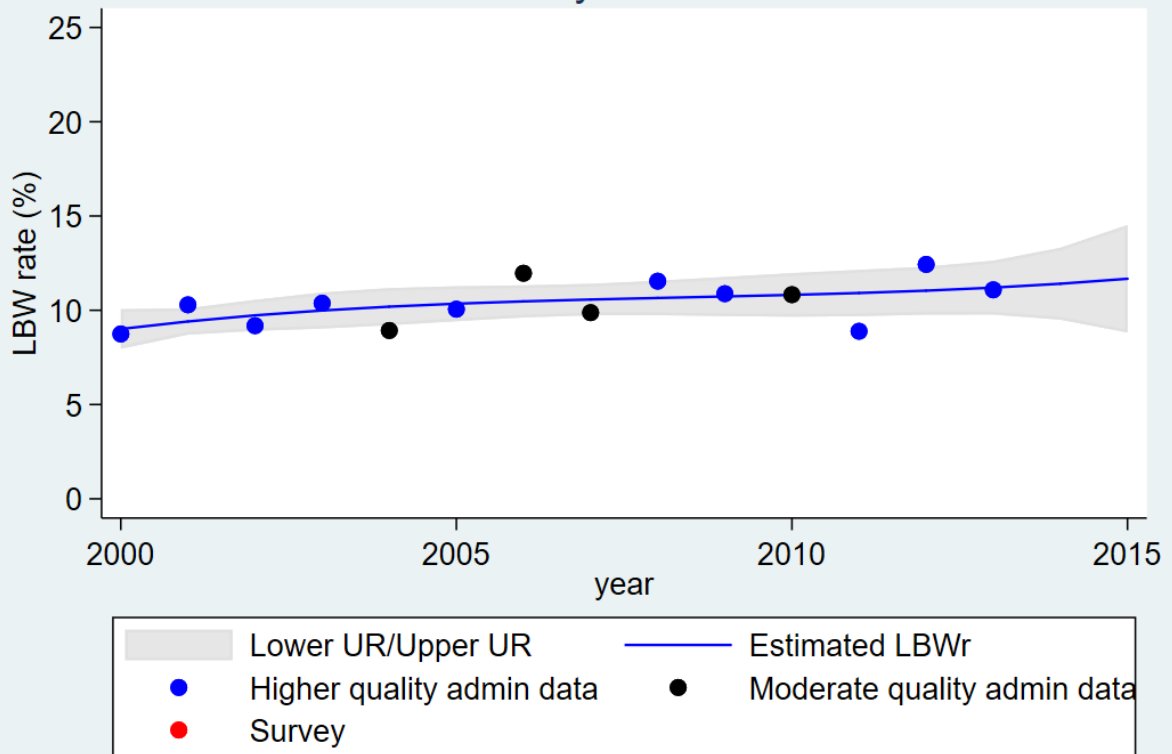

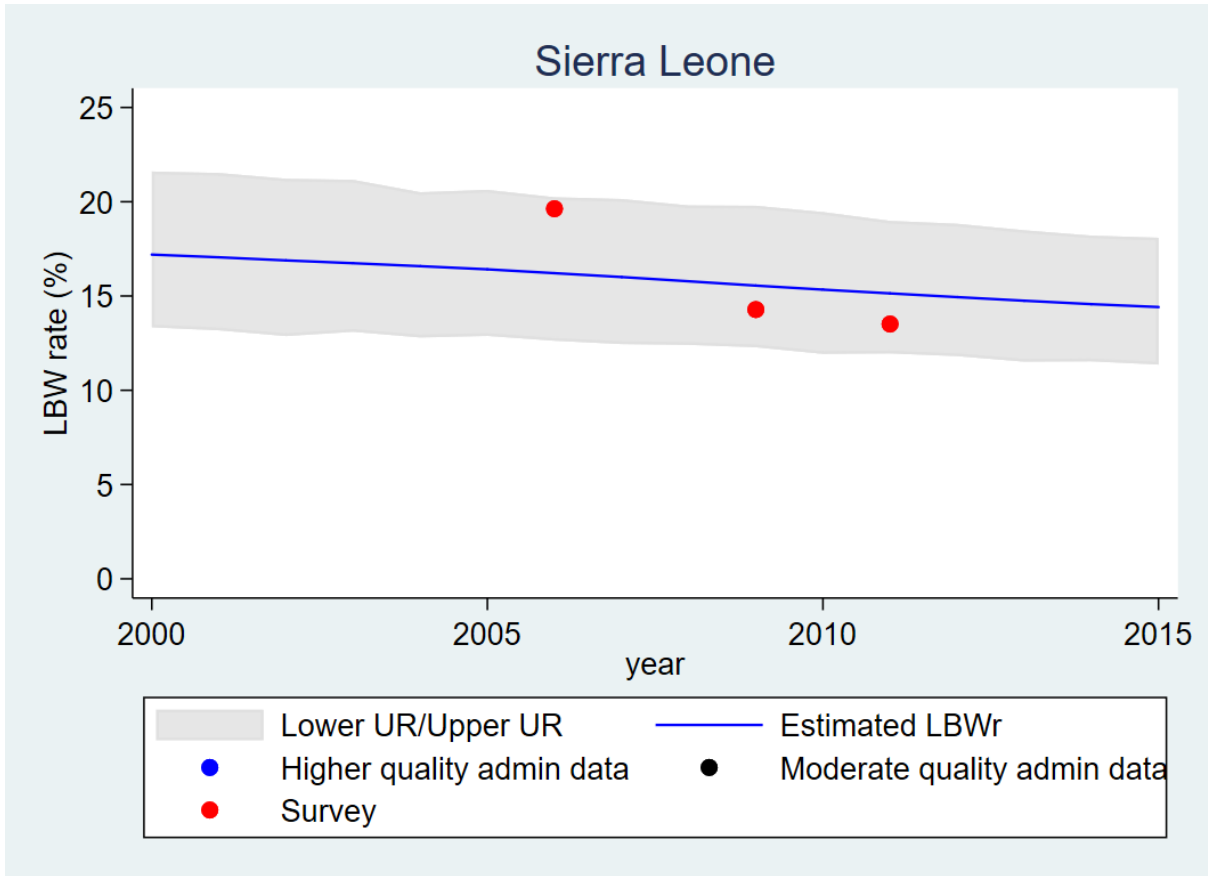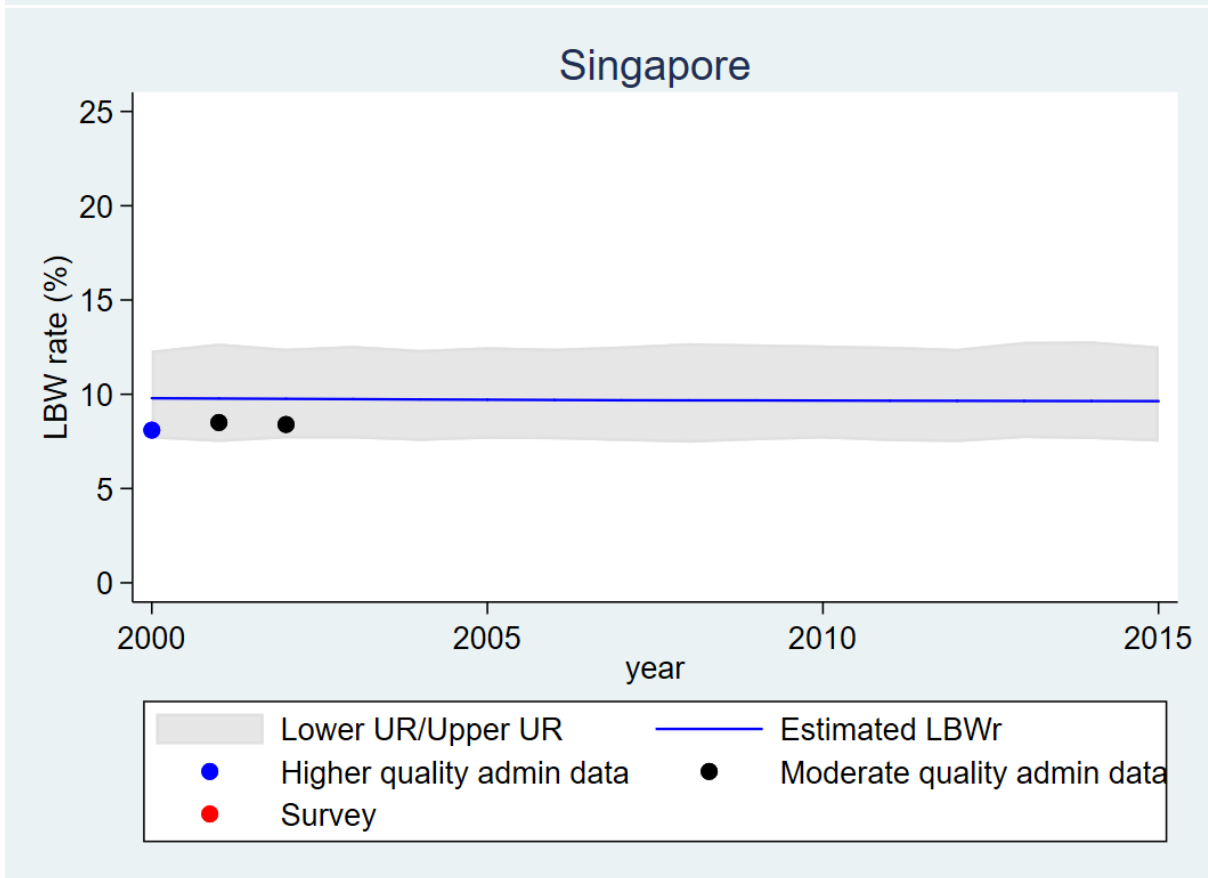

### Slovakia

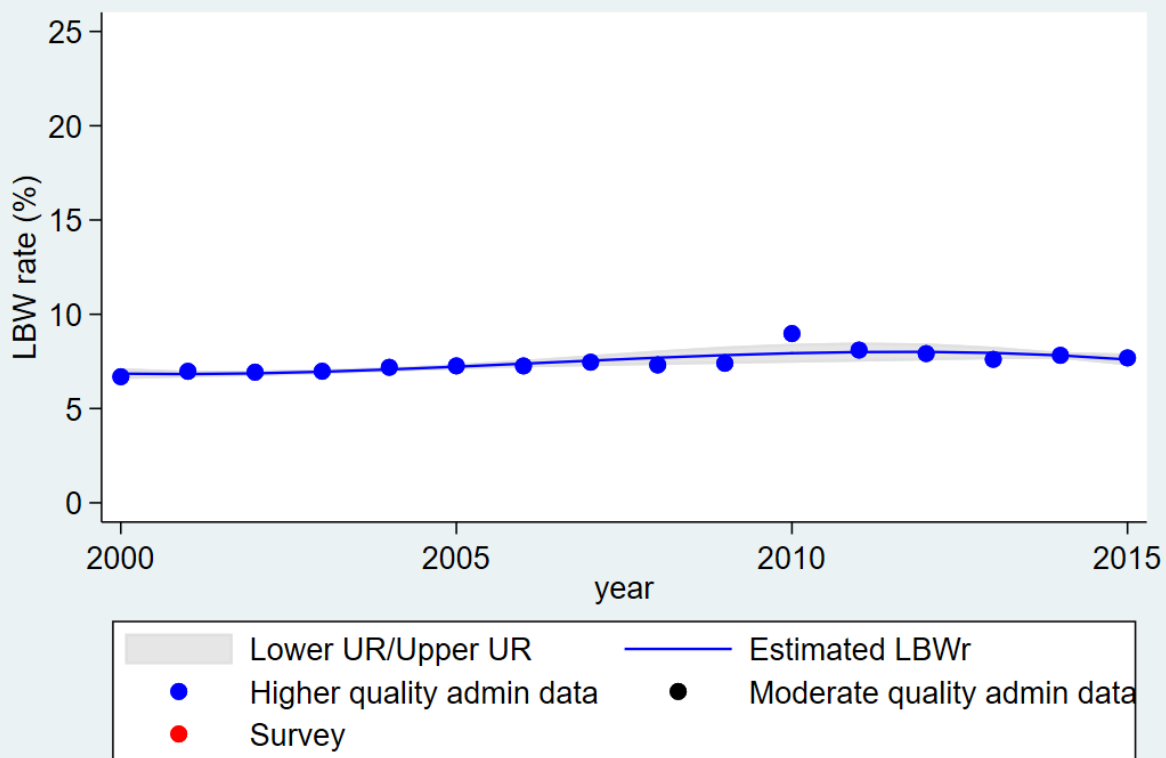

### Slovenia

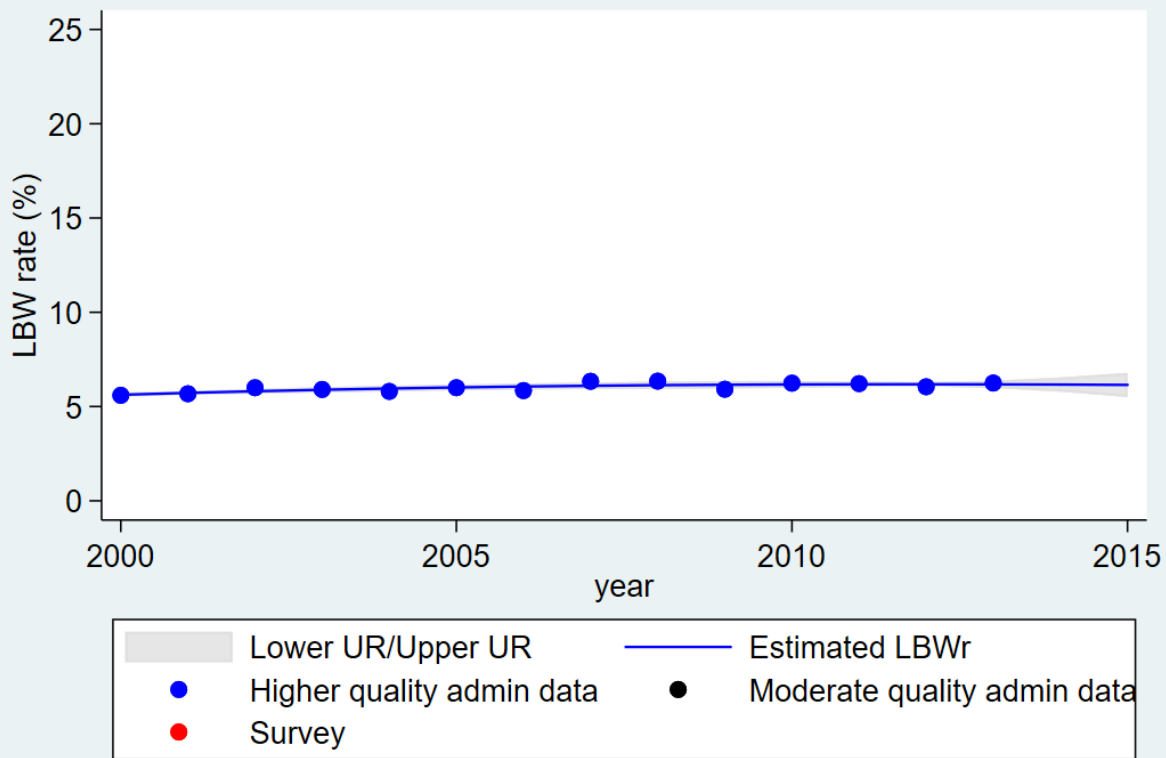

### South Africa

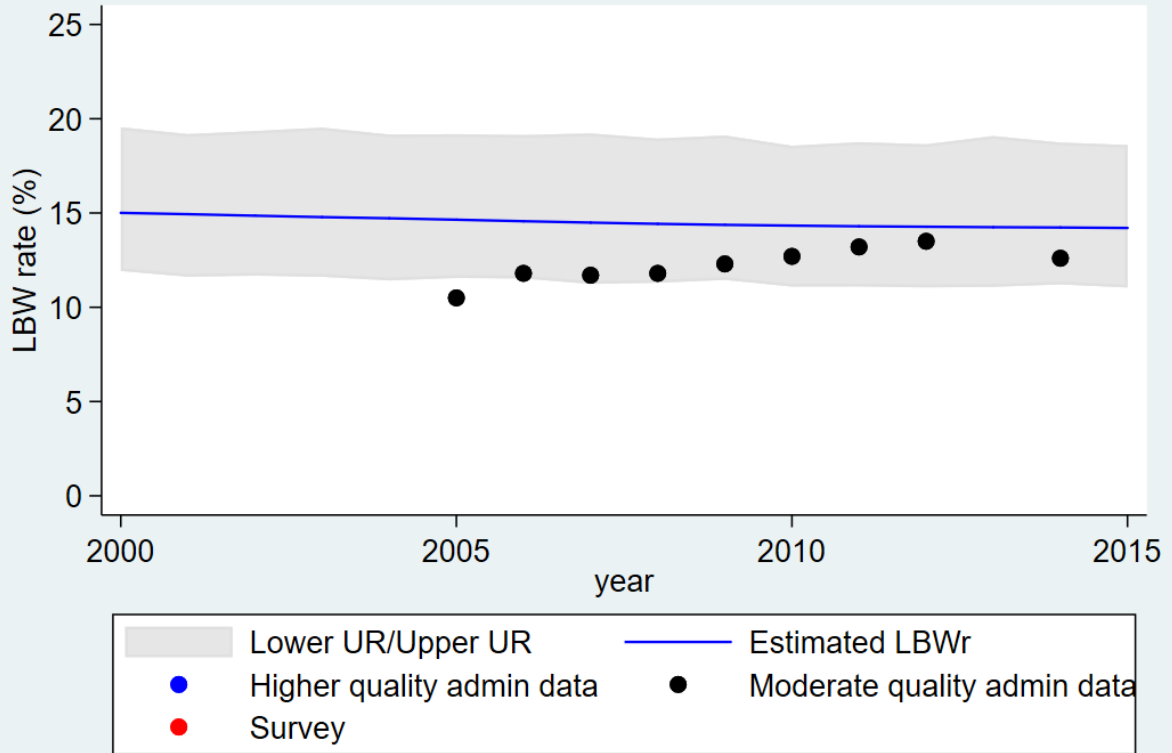

### Spain

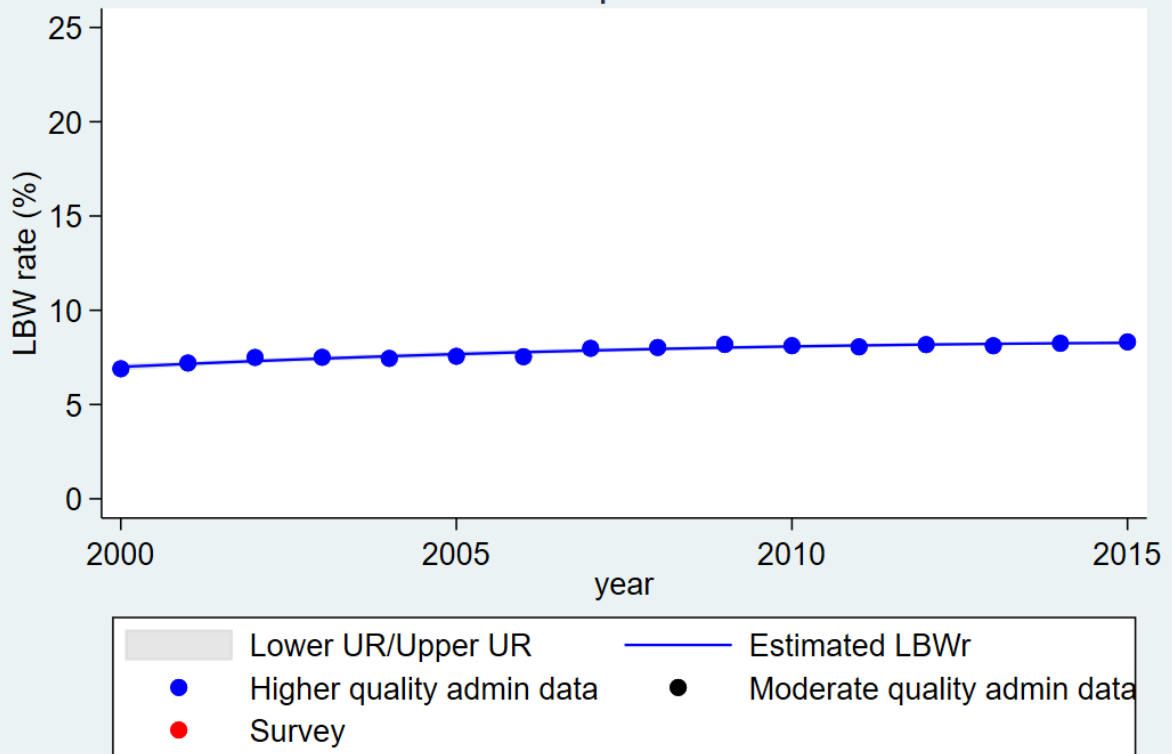

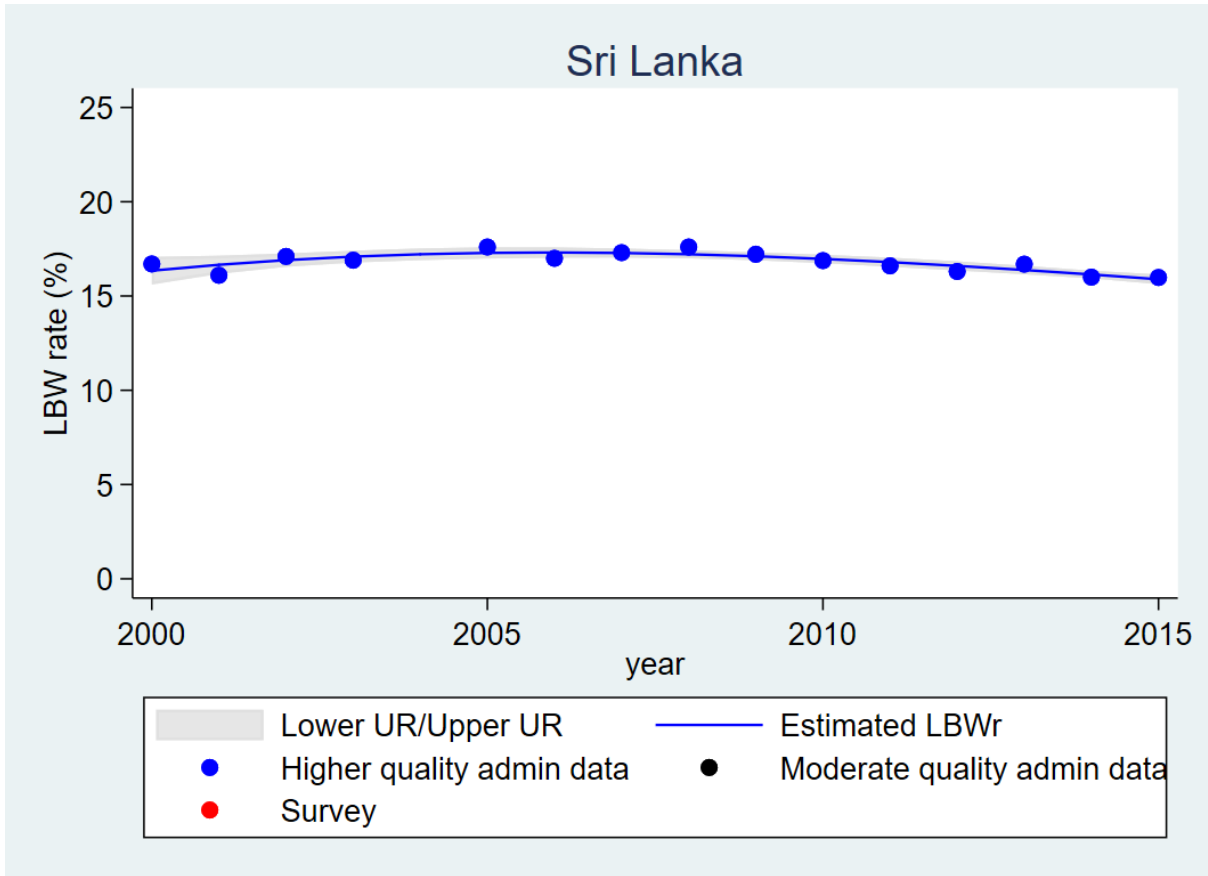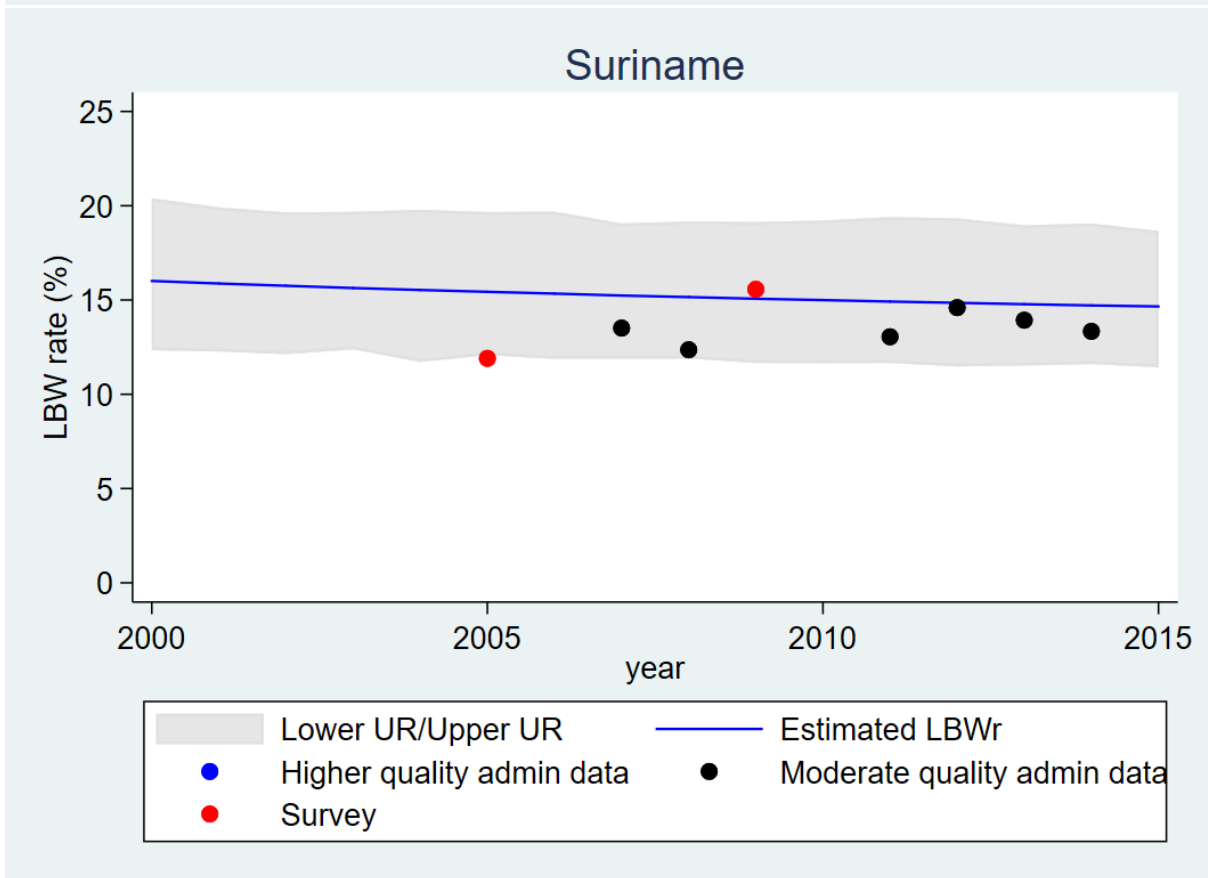

### Swaziland

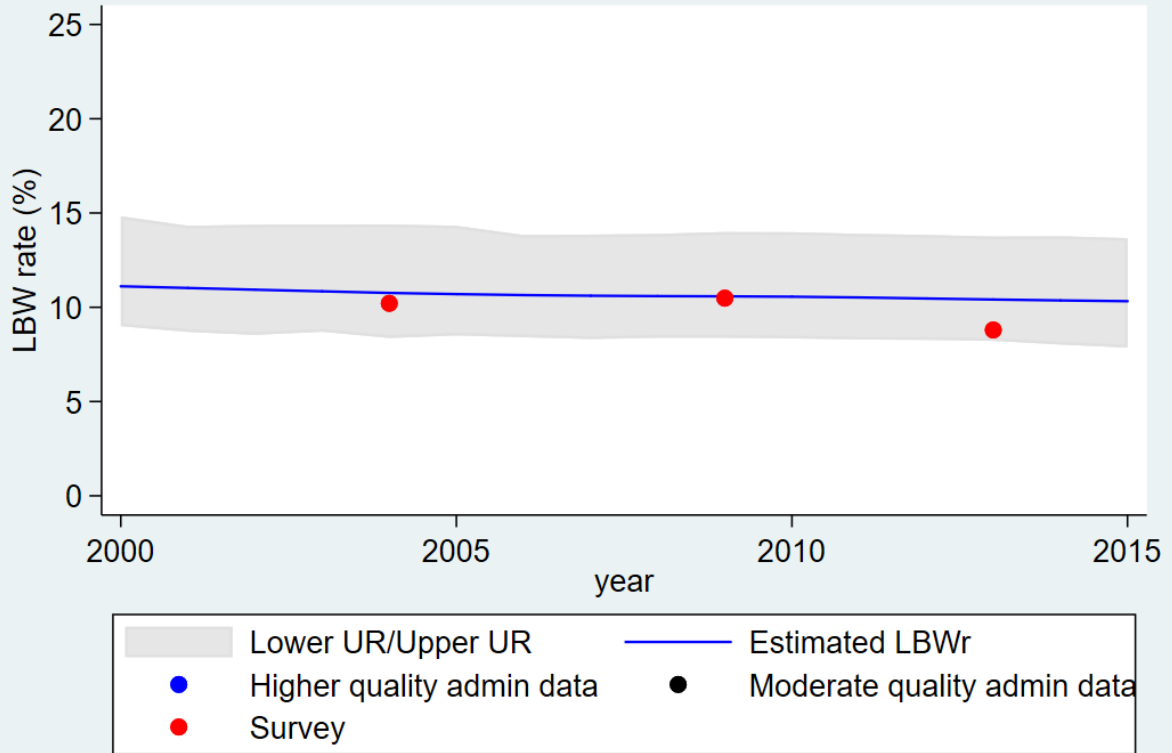

### Sweden

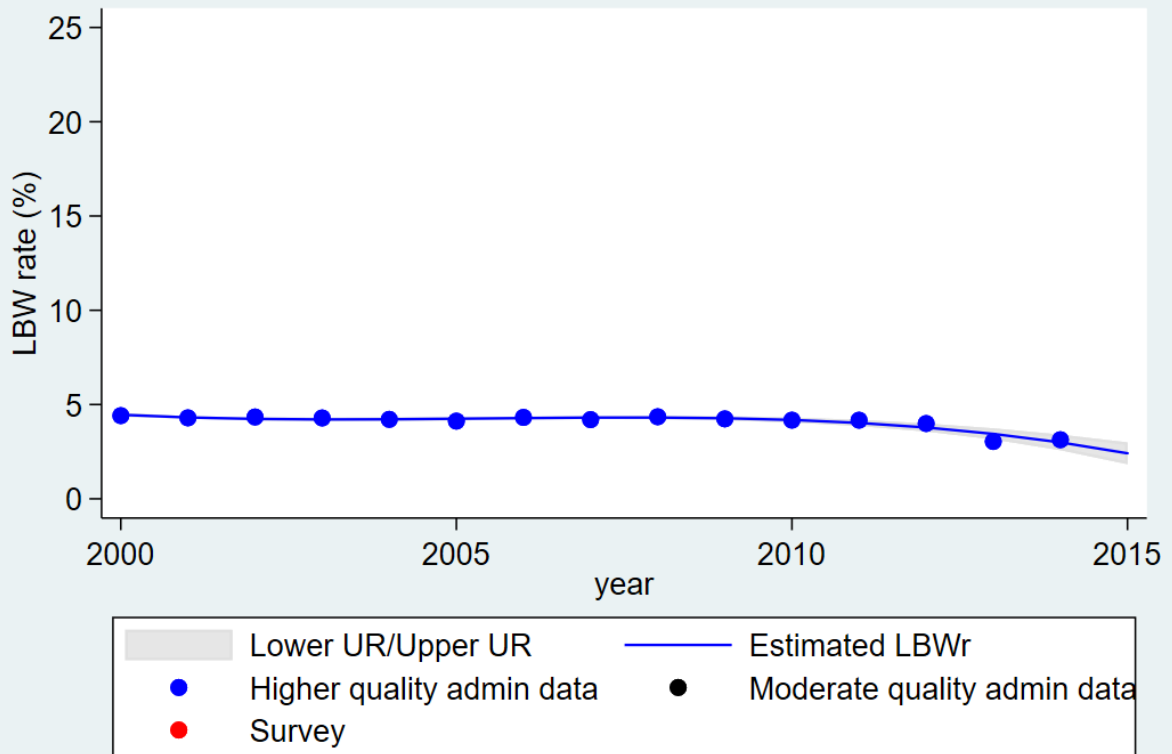

### Switzerland

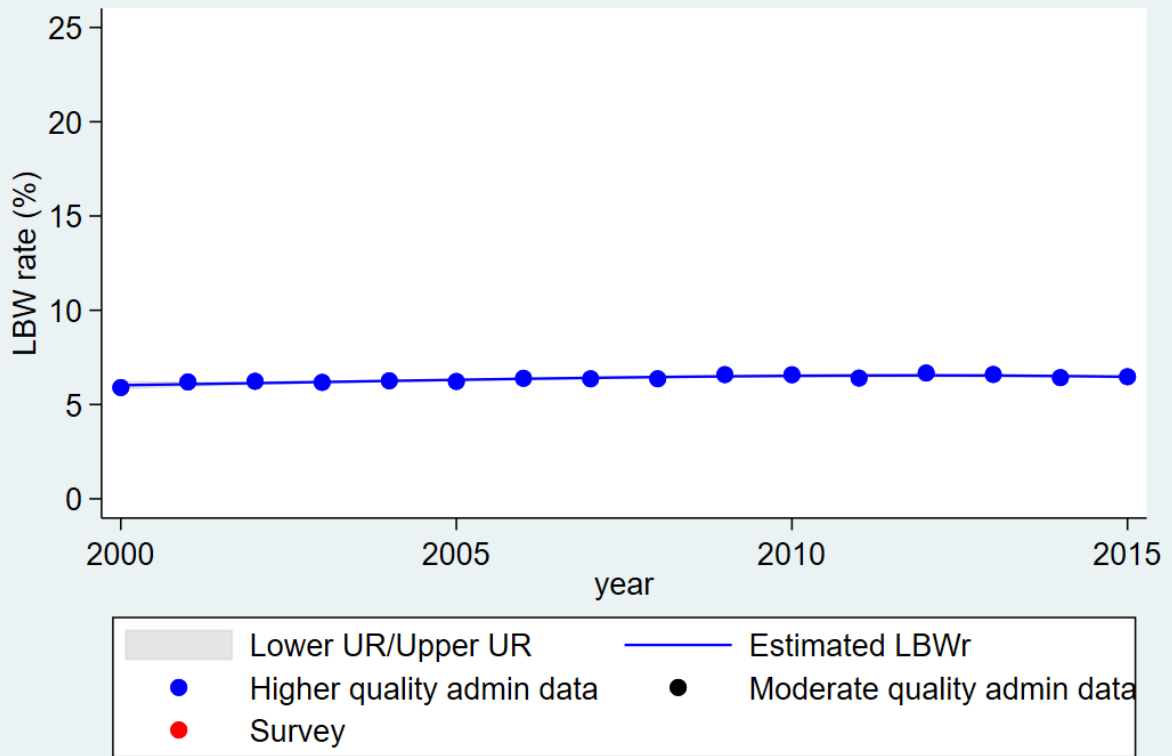

### Tajikistan

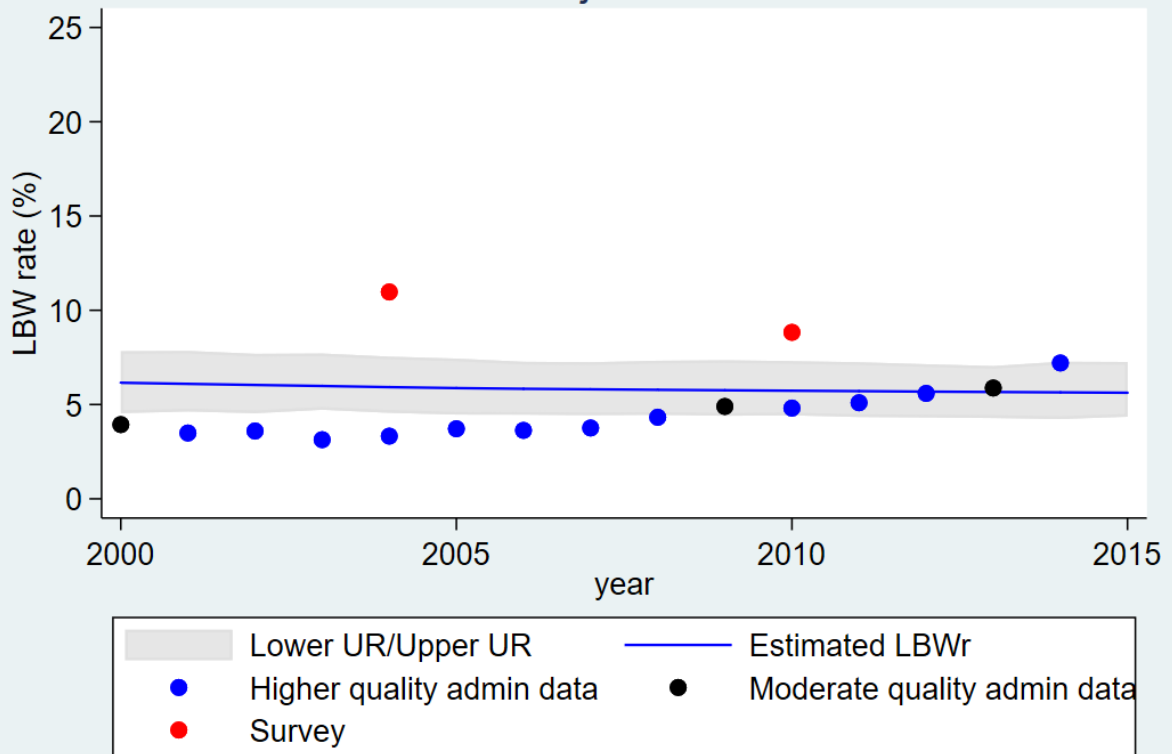

### Thailand

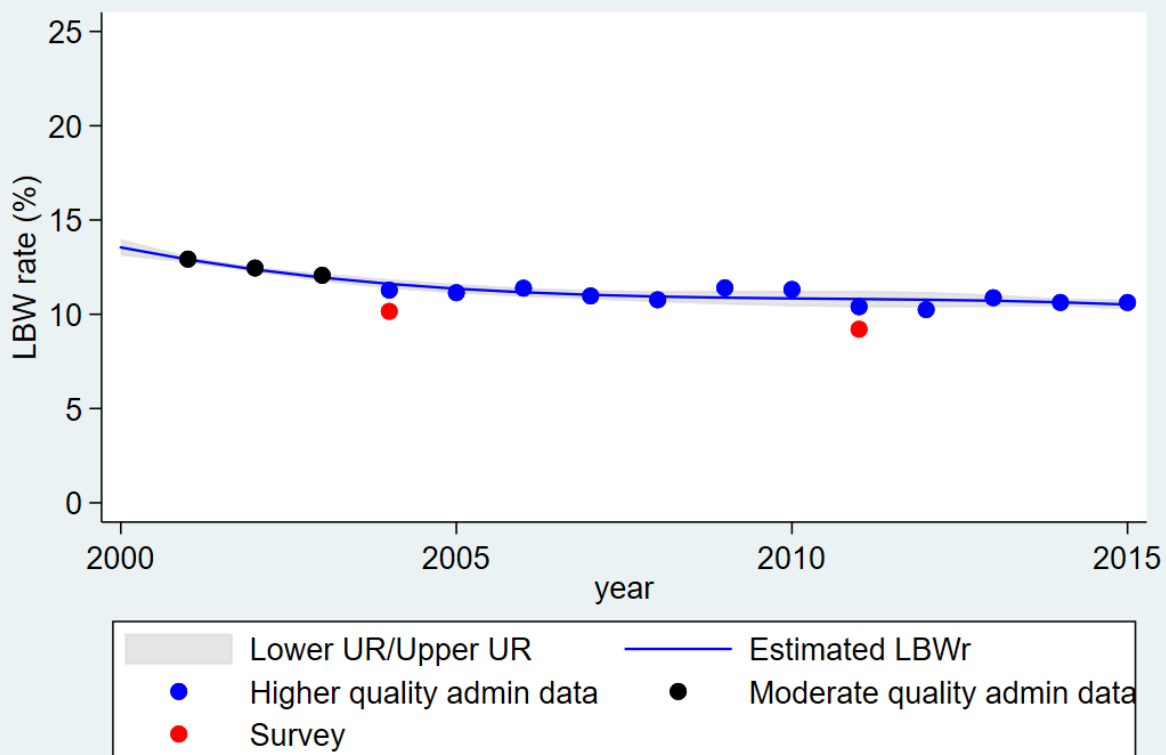

### The former Yugoslav Republic of Macedonia

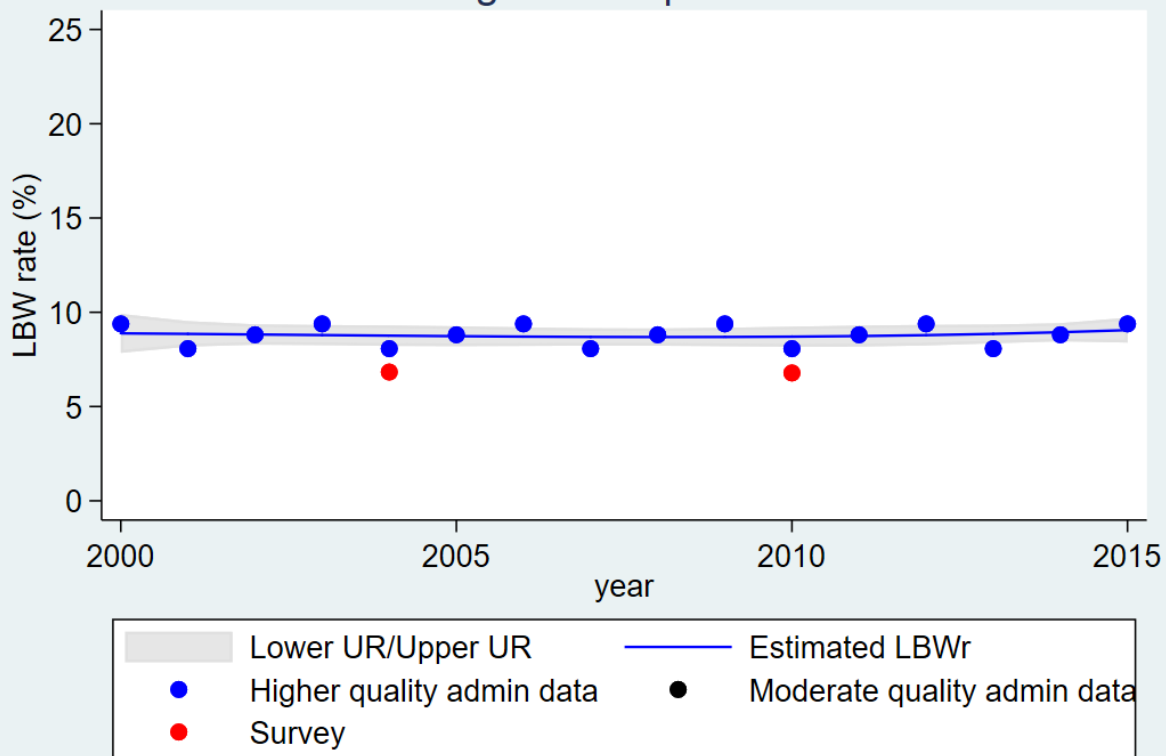



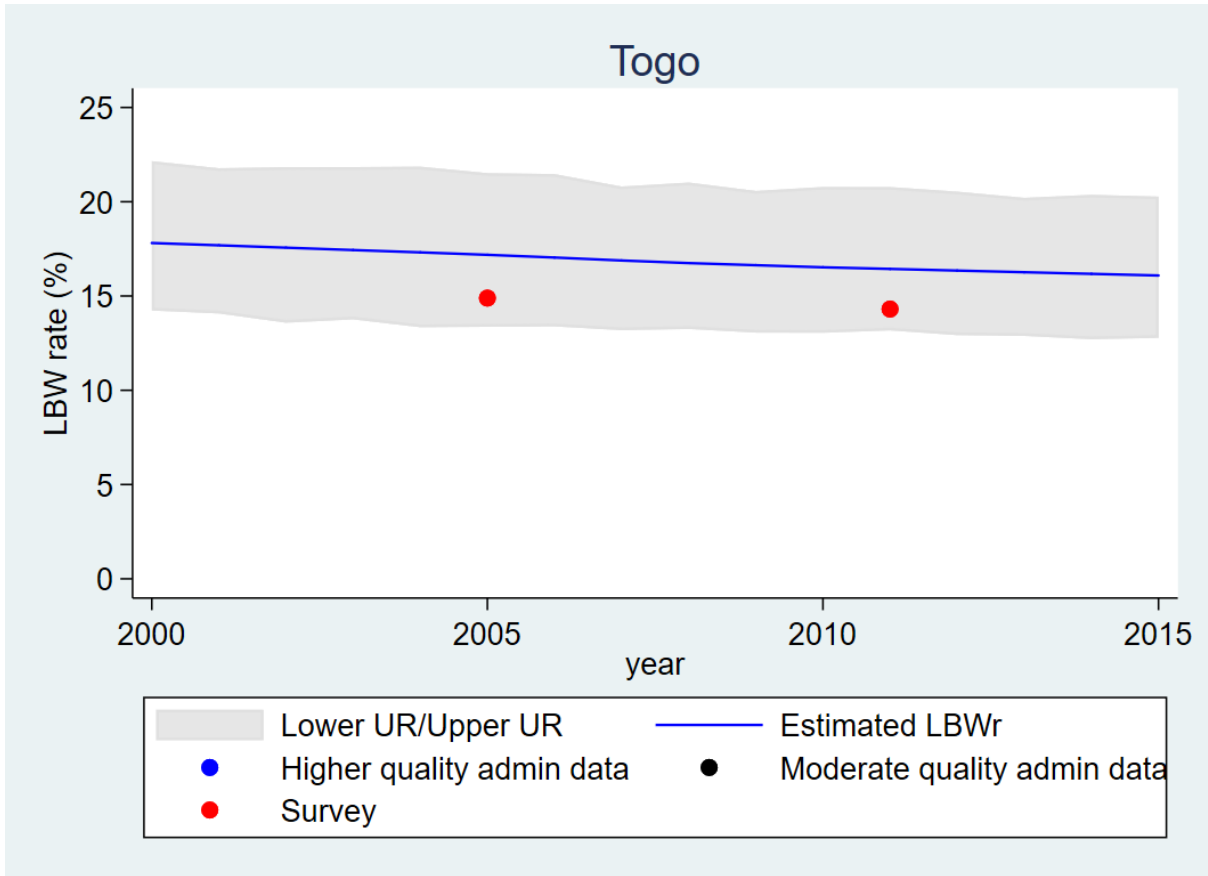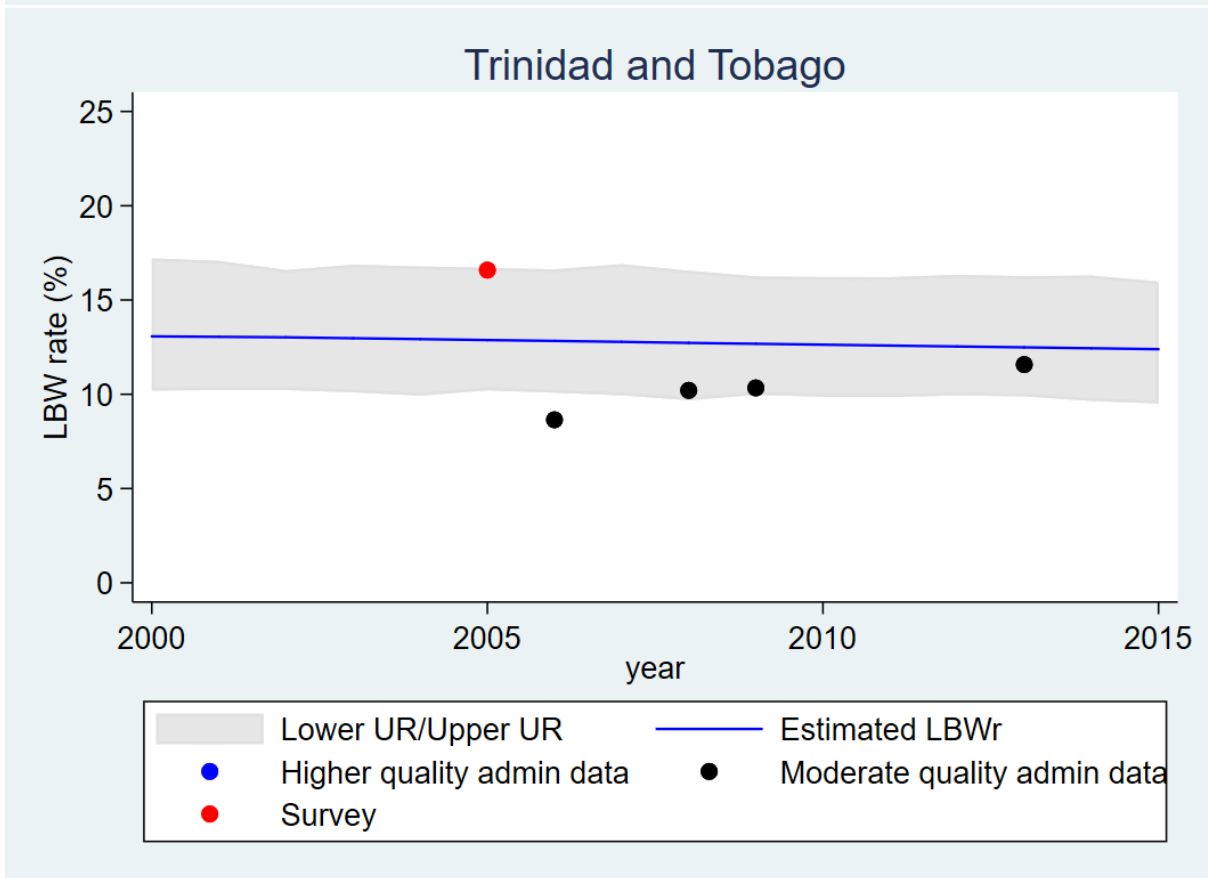

### Tunisia

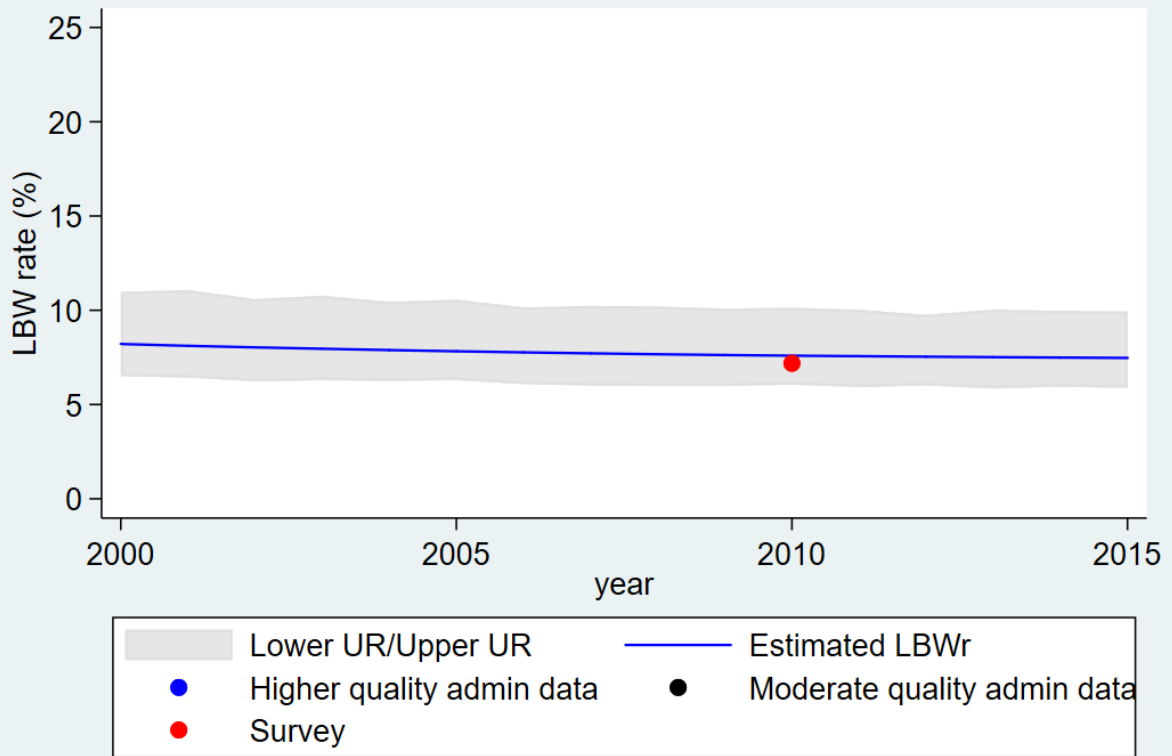

### Turkey

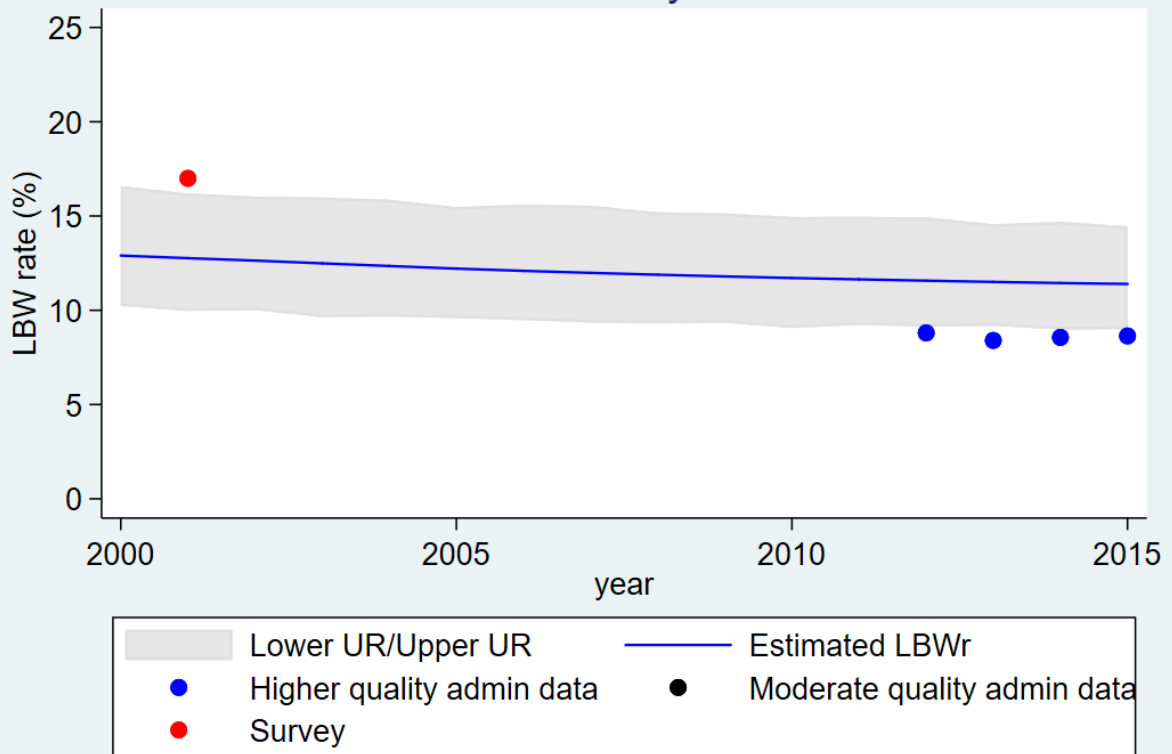

## Turkmenistan

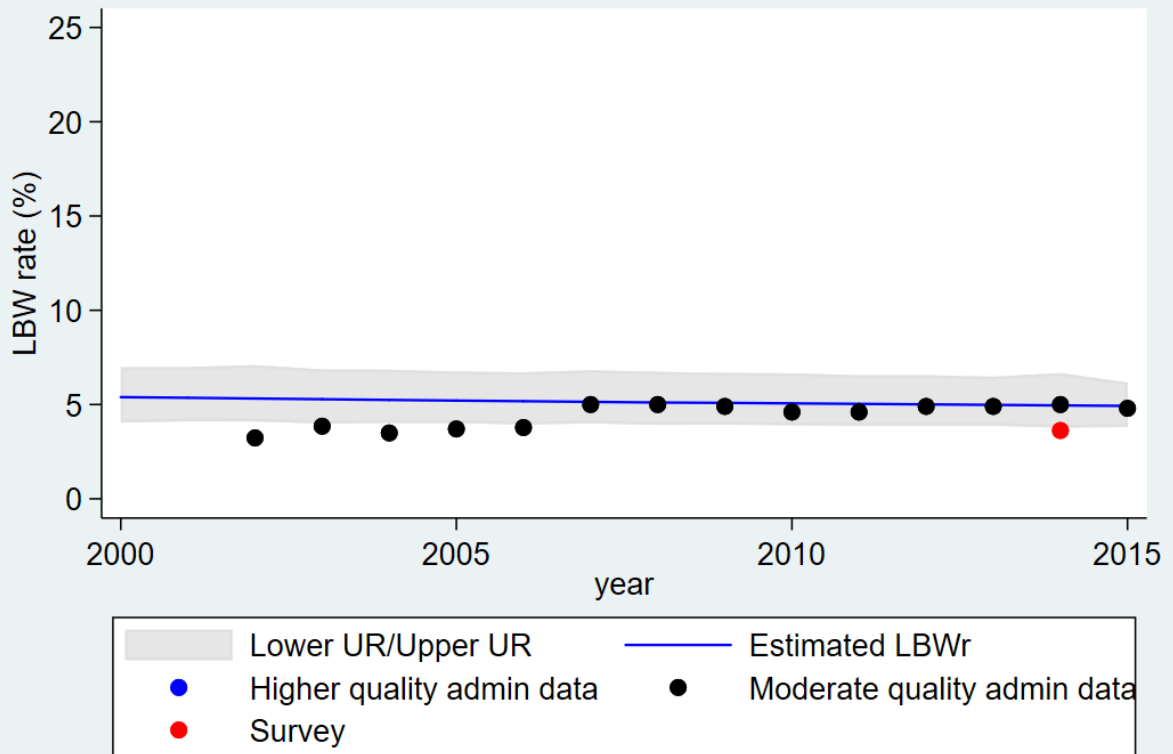

## Ukraine

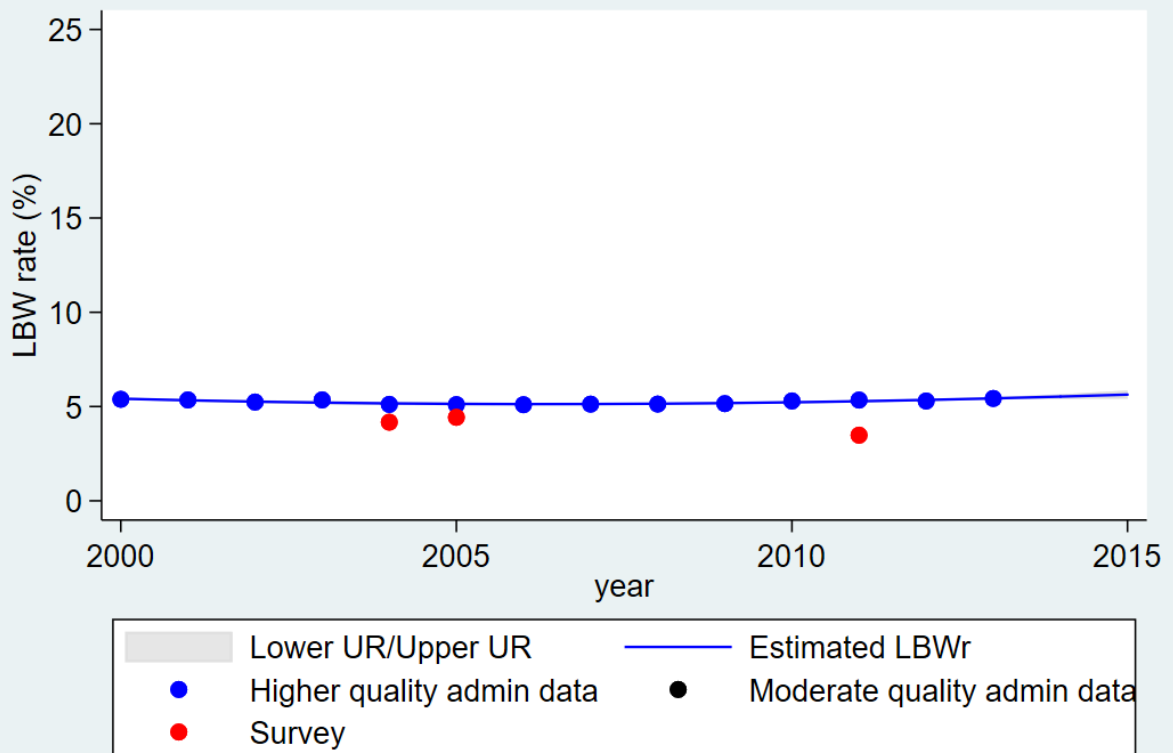

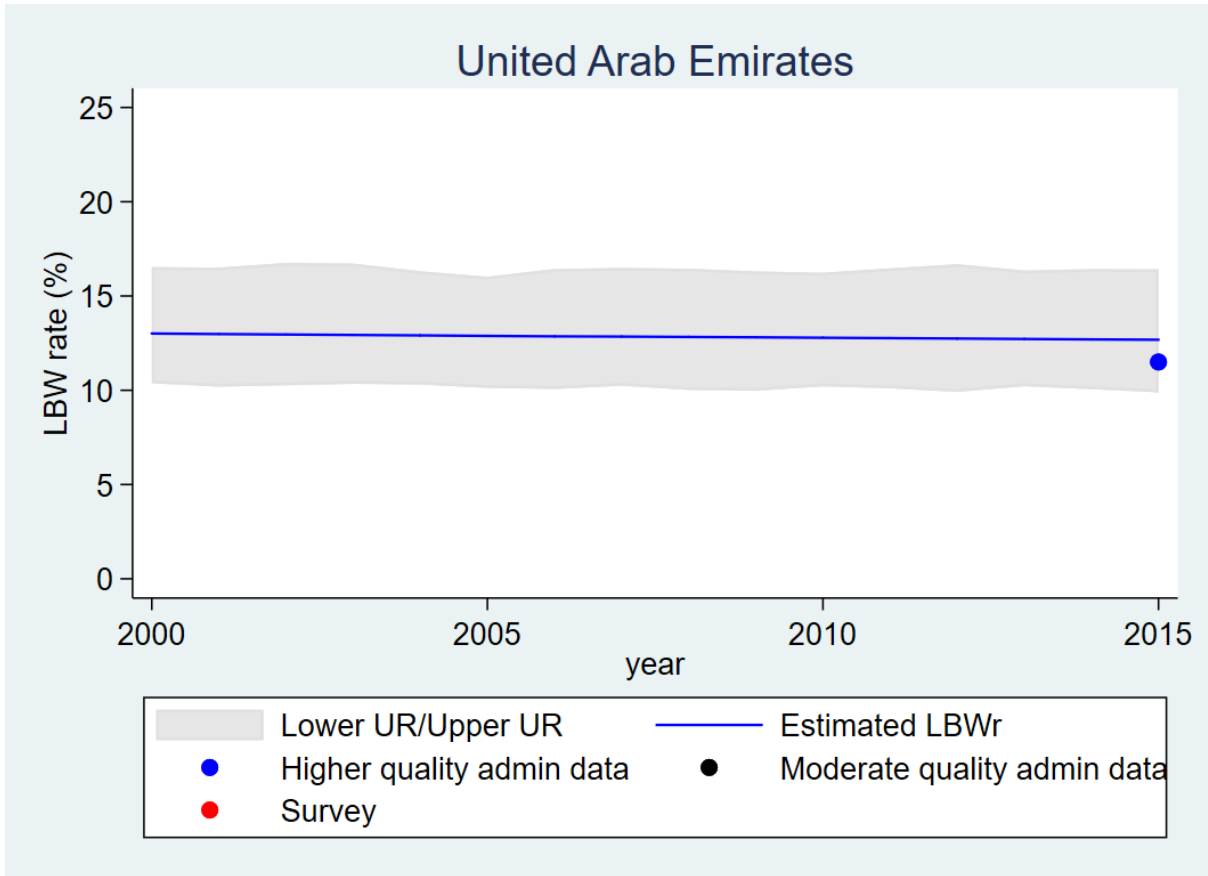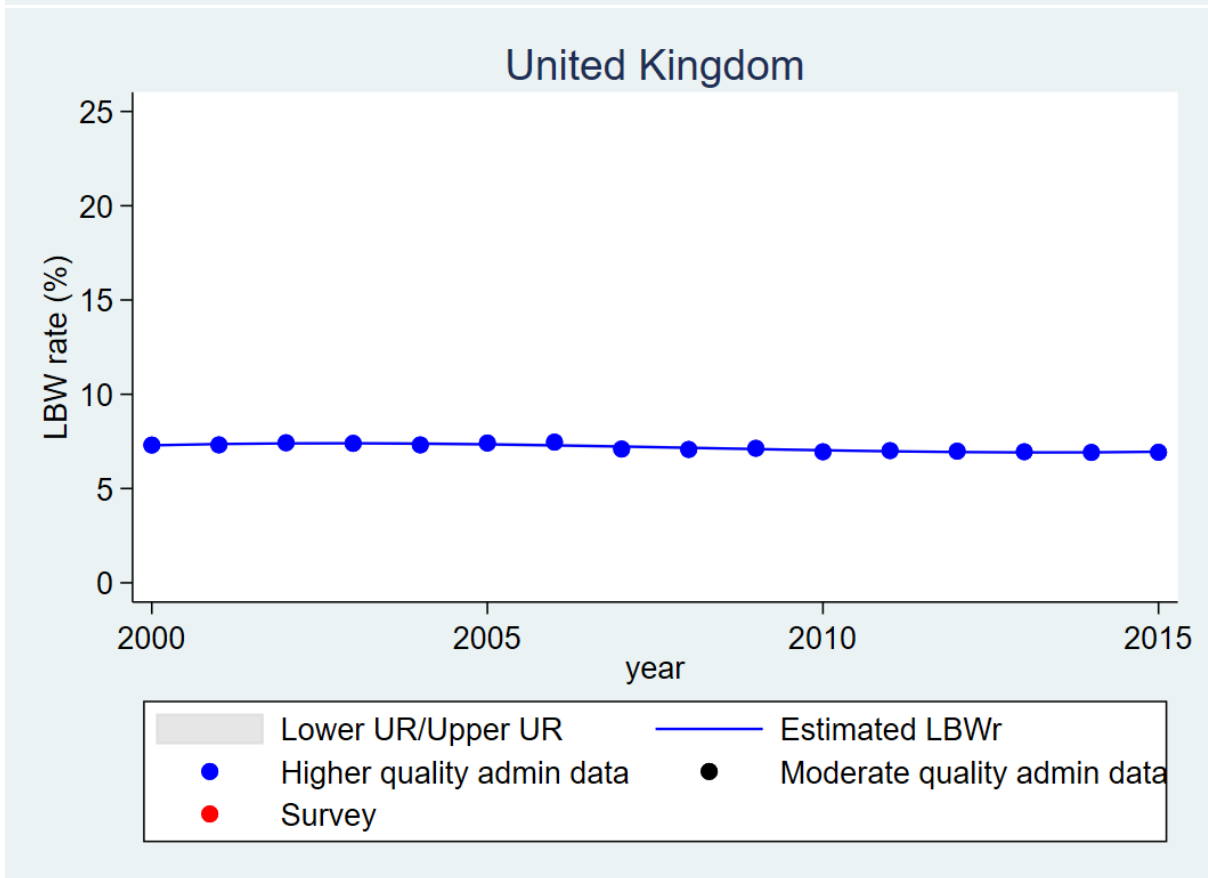

### United Republic of Tanzania

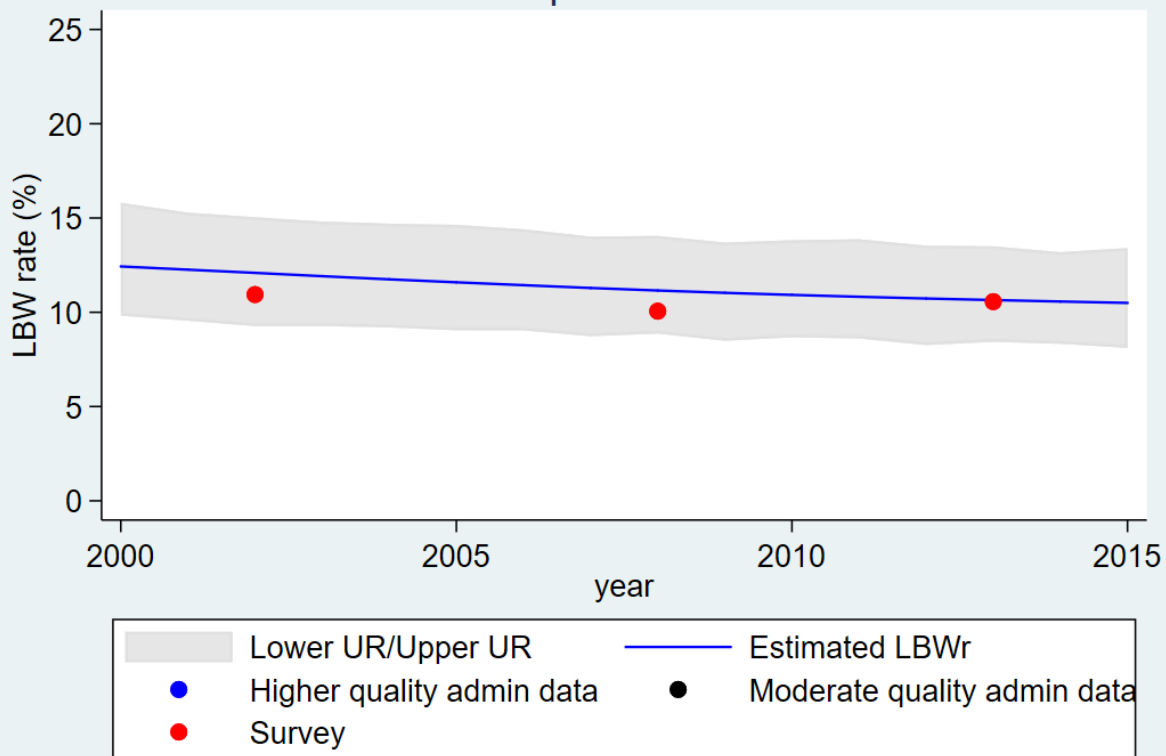

### United States of America

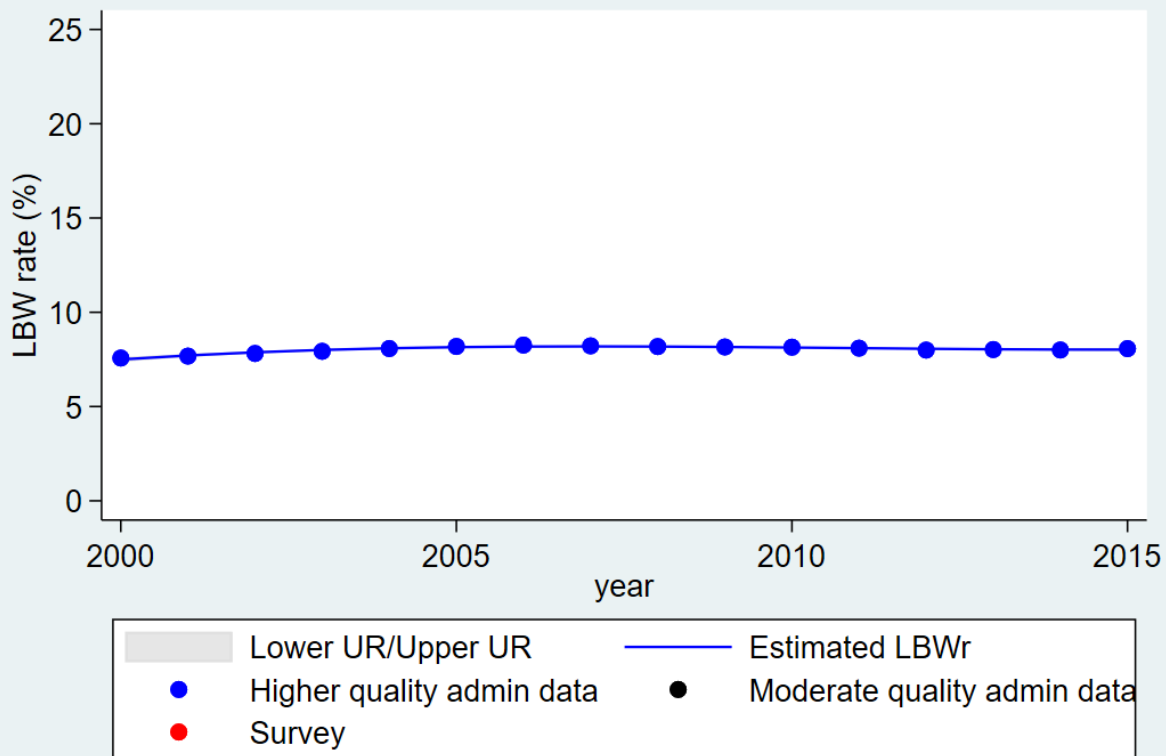

### Uruguay

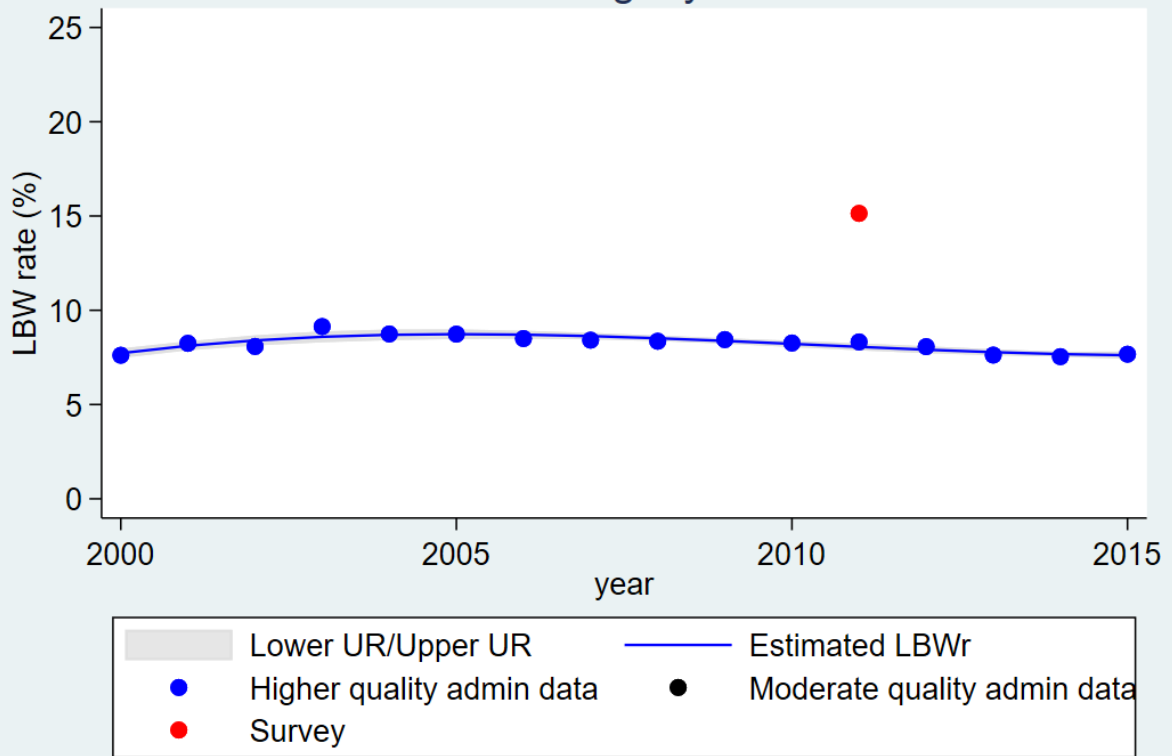

### Uzbekistan

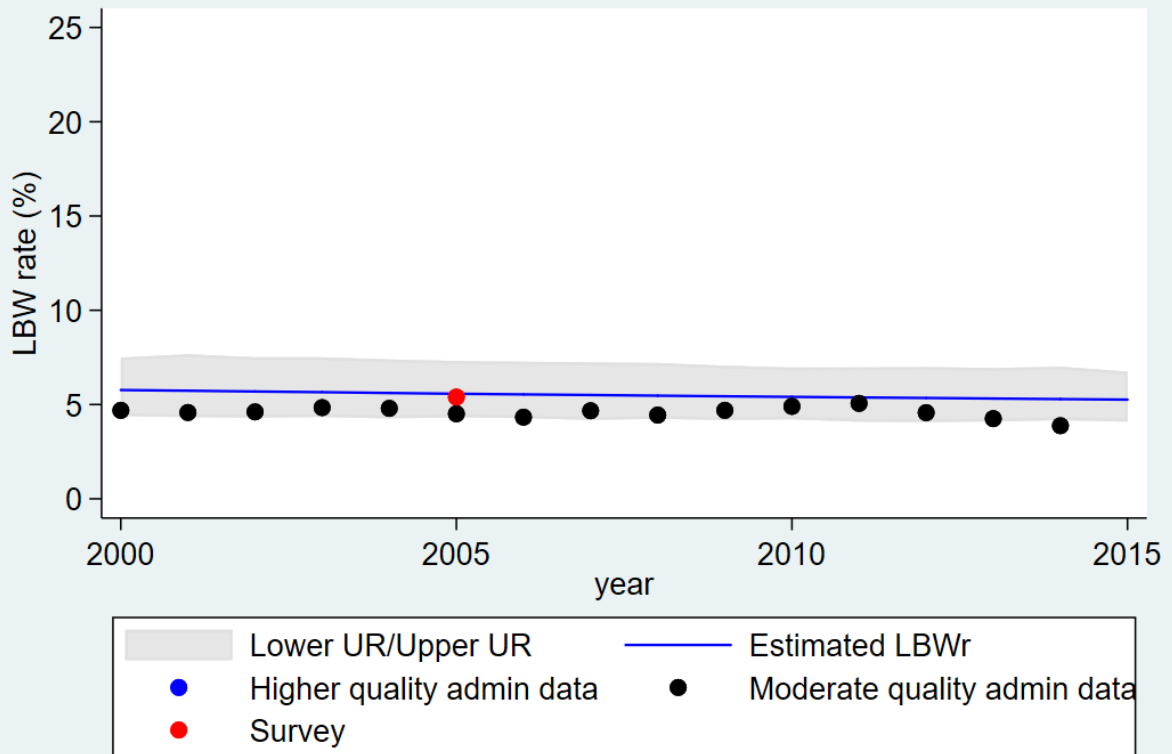

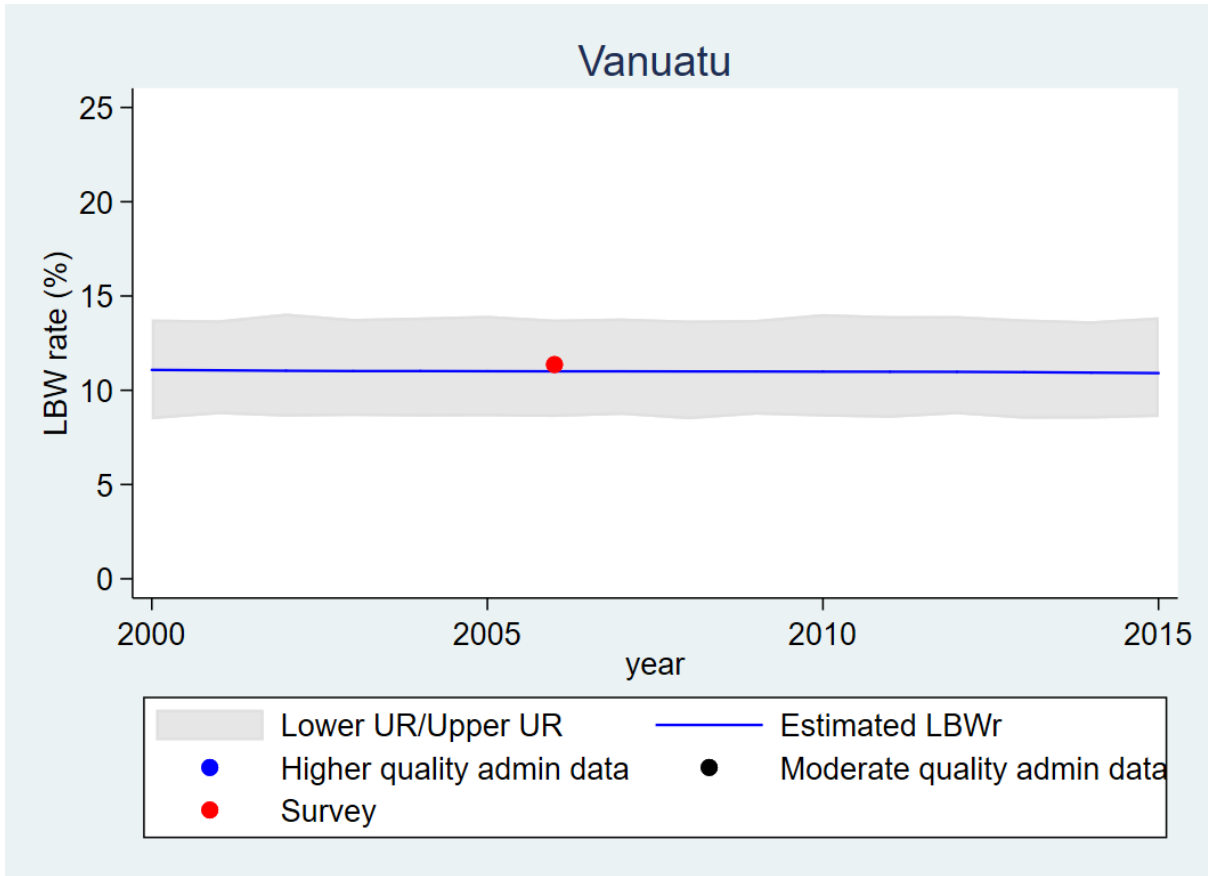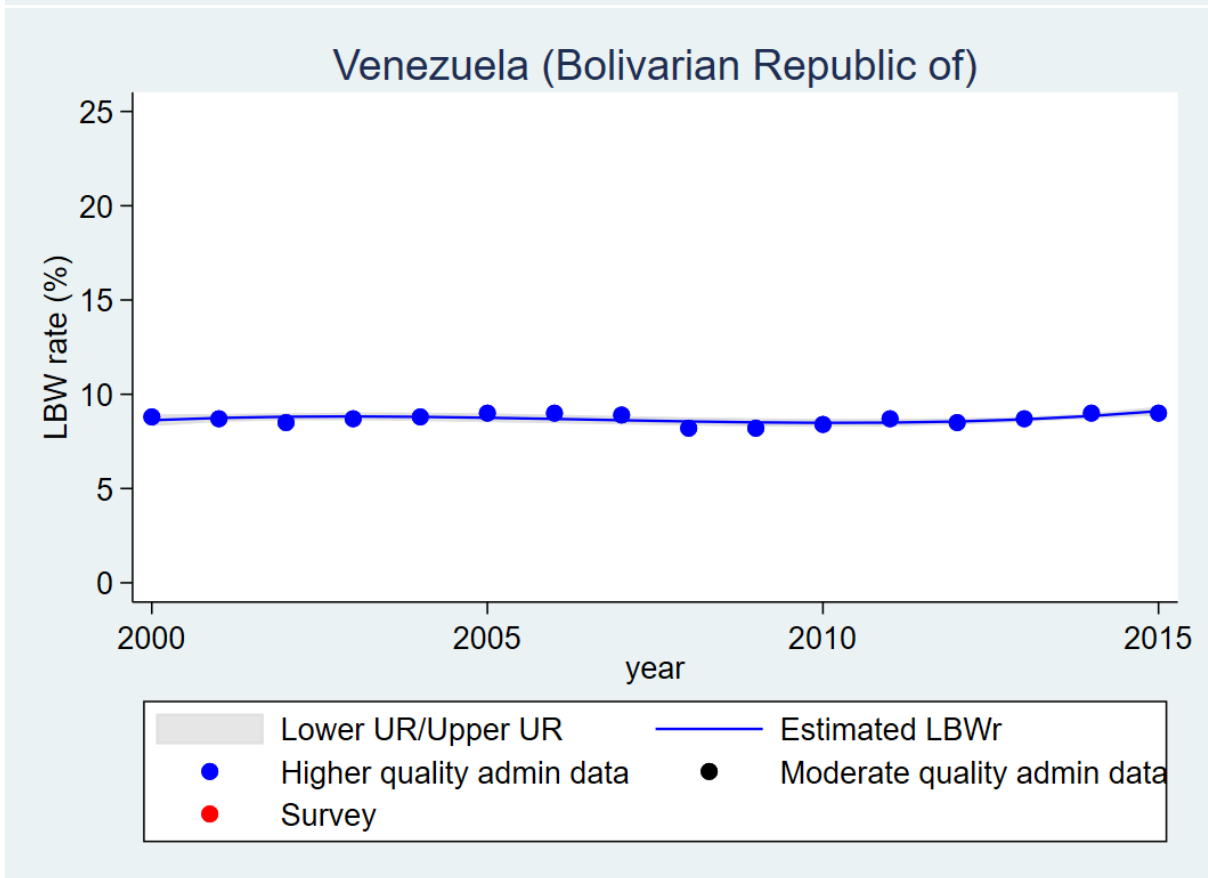

### Viet Nam

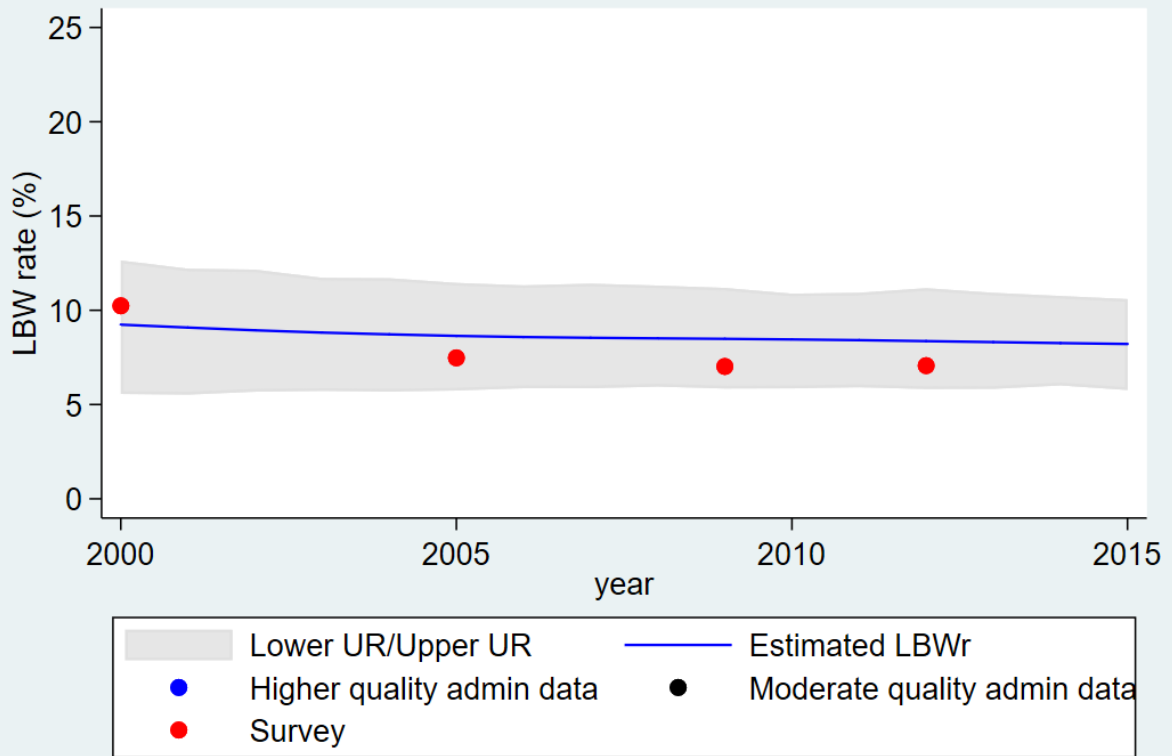

### West Bank and Gaza Strip

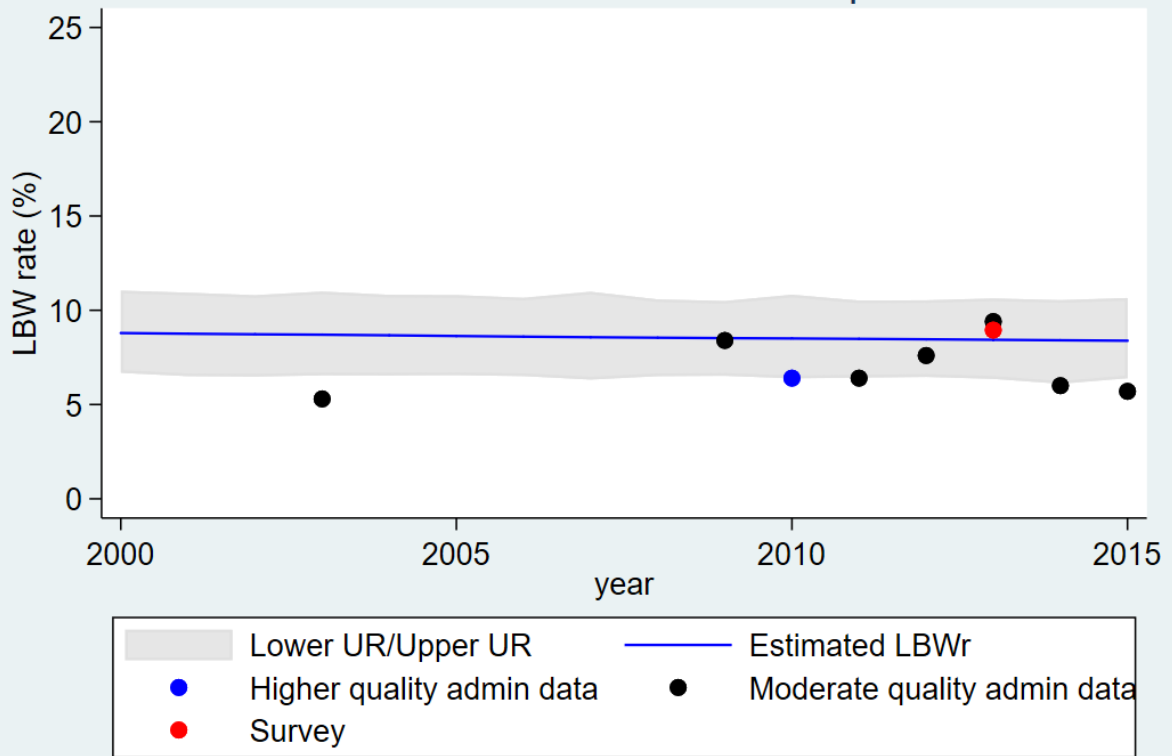



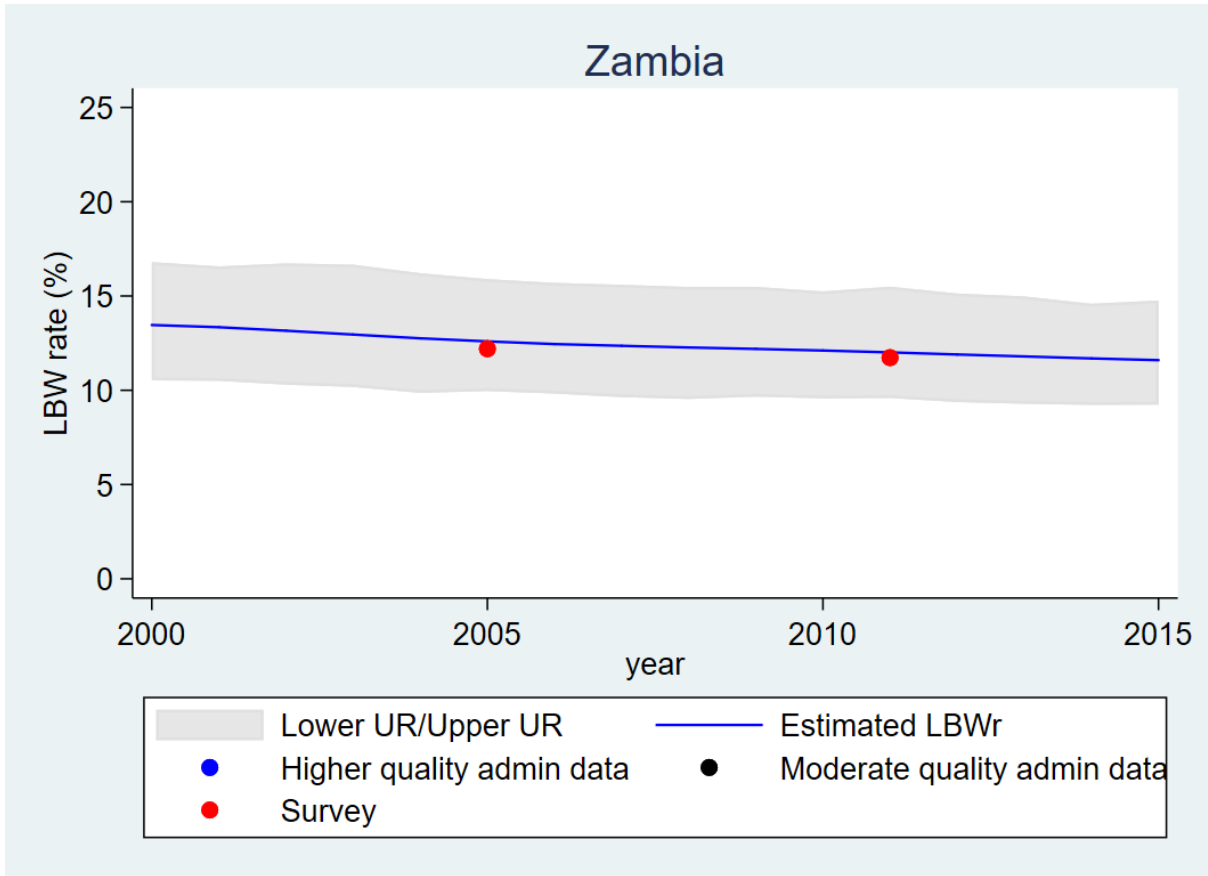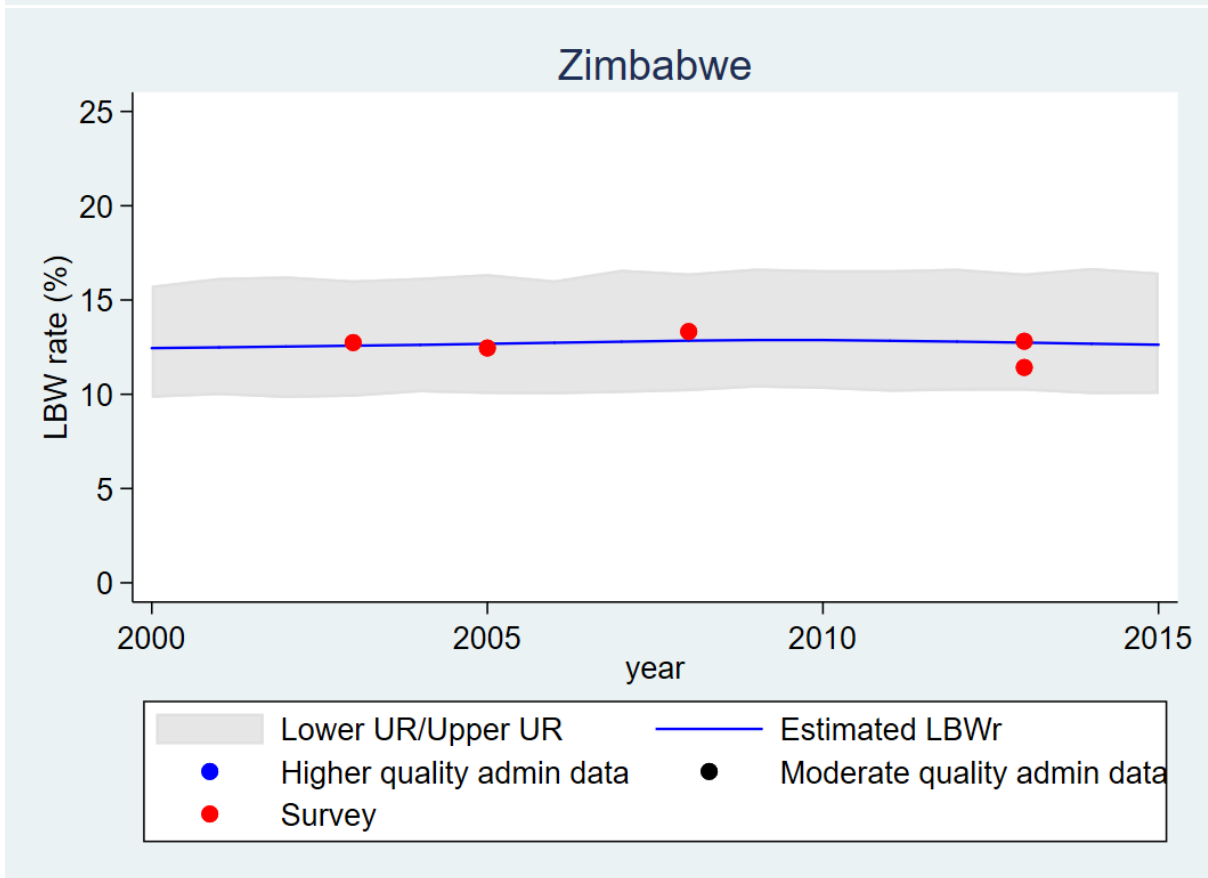



## 9. ReferencesReferences

1. Stevens, G.A., et al., *Guidelines for Accurate and Transparent Health Estimates Reporting: the GATHER statement*. Lancet, 2016. **388**(10062): p. e19-e23.
2. Phillips, D.E., et al., *A composite metric for assessing data on mortality and causes of death: the vital statistics performance index*. Popul Health Metr, 2014. **12**: p. 14.
3. WHO, et al., *Trends in Maternal Mortality: 1990 to 2013*  
<http://www.who.int/reproductivehealth/publications/monitoring/maternal-mortality-2013/en/>, 2014.
4. Blencowe, H., et al., *National, regional, and worldwide estimates of stillbirth rates in 2015, with trends from 2000: a systematic analysis*. Lancet Glob Health, 2016. **4**(2): p. e98-e108.
5. Barro R and Lee JW, *A new Data Set of Educational Attainment in the World, 1950 - 2010*. Journal of development Economics, 2013: p. 184 - 198.
6. Stevens, G.A., et al., *Trends in mild, moderate, and severe stunting and underweight, and progress towards MDG 1 in 141 developing countries: a systematic analysis of population representative data*. Lancet, 2012. **380**(9844): p. 824-34.
7. UN Population Division, *World Population Prospects: the 2017 Revision*.  
<http://esa.un.org/wpp/index.htm>, 2017.
